# Supplementary material for: Deciphering the molecular mechanisms of mother-to-egg immune protection in the mealworm beetle Tenebrio molitor
Source: PLoS Pathog. 2020 Oct 15;16(10):e1008935. doi: 10.1371/journal.ppat.1008935 (PMC7591081; doi:10.1371/journal.ppat.1008935)
Supplement: S4 Table — (XLSX) [file ppat.1008935.s005.xlsx]

## Sheet: Sheet1
						Datafile	5939	5942	5951	5954	5957
						Sample	Bacillus t 1	Control 1	Control 2	Bacillus t 2	Serratia 1
Accession	Description	ΣCoverage	Σ# Proteins	Σ# Unique Peptides	Σ# Peptides	Σ# PSMs	Score A3	Score B3	Score C3	Score D3	Score E3	Coverage A3	Coverage B3	Coverage C3	Coverage D3	Coverage E3	# Peptides A3	# Peptides B3	# Peptides C3	# Peptides D3	# Peptides E3	# AAs	MW [kDa]	calc. pI
c100668_g2_i1:1277:2201:2:+	len=308 acc=c100668_g2_i1:1277:2201:2:+ = interpro_raw=IPR008160 id=c100668_g2_i1:1277:2201:2:+ def=IPR008160:Collagen triple helix repeat;	100	1	196	229	287	444.014	404.694	316.554	186.059	376.593	96.1	96.75	100	90.91	97.08	69	61	52	29	46	308	29.725	8.22119
c102471_g2_i2:1:294:1:+	len=98 acc=c102471_g2_i2:1:294:1:+ go=GO:0005515 interpro_raw=IPR002110,IPR020683 interpro_domain=IPR020683 id=c102471_g2_i2:1:294:1:+ def=IPR020683:Ankyrin repeat-containing domain;	100	1	8	11	12	27.409	16.1679	4.98316		22.5556	82.65	72.45	42.86		65.31	5	2	1		4	98	10.8468	6.27783
c103069_g2_i1:281:461:2:+	len=60	100	1	2	2	2				2.96094	3.44988	0			60	100				1	1	60	6.55007	4.32275
c103479_g6_i1:1:247:2:+	len=82 acc=c103479_g6_i1:1:247:2:+ ec=3.4.21.- interpro_domain=IPR009003 id=c103479_g6_i1:1:247:2:+ go=GO:0006508,GO:0004252 interpro_raw=IPR009003,IPR001254 def=IPR009003:Trypsin-like cysteine/serine peptidase domain;	100	1	3	6	8	27.6368		4.05905		36.6237	95.06		56.79		100	3		1		3	81	9.06784	9.59814
c104011_g1_i2:1:523:2:+	len=174 acc=c104011_g1_i2:1:523:2:+ interpro_raw=IPR005521,IPR019729 interpro_family=IPR019729 go=GO:0005576 interpro_domain=IPR005521 id=c104011_g1_i2:1:523:2:+ def=IPR005521:Attacin, C-terminal; IPR019729:Gloverin-like protein;	100	1	19	44	107	178.832		8.30037	240.747	45.6797	53.18	0	30.06	100	36.42	20		2	28	6	173	19.0735	8.14795
c105080_g1_i4:619:1293:1:+	len=225 acc=c105080_g1_i4:619:1293:1:+ interpro_raw=IPR013723,IPR003652 go=GO:0003723,GO:0005515 interpro_domain=IPR013723 id=c105080_g1_i4:619:1293:1:+ def=IPR013723:Ataxin-1/HBP1 module (AXH);	100	2	2	10	10	3.11793	28.4741	11.6457		13.7171	21.43	55.8	58.48	0	29.46	1	4	2		3	224	24.4868	10.0815
c105493_g1_i1:70:390:1:+	len=107 acc=c105493_g1_i1:70:390:1:+ interpro_domain=IPR016188 id=c105493_g1_i1:70:390:1:+ interpro_raw=IPR016188 go=GO:0003824 def=IPR016188:PurM, N-terminal-like;	100	1	1	25	35	77.3647	36.0321	23.036	37.1478	61.9921	89.72	83.18	79.44	93.46	88.79	10	4	3	5	10	107	11.3056	8.48486
c43905_g1_i1:1:478:2:+	len=159 acc=c43905_g1_i1:1:478:2:+ interpro_domain=IPR024084 id=c43905_g1_i1:1:478:2:+ ec=1.1.1.42 pathways=MetaCyc:PWY-7124,MetaCyc:PWY-6549,KEGG:ec00020+1.1.1.42,MetaCyc:PWY-7254,MetaCyc:PWY-6969,KEGG:ec00720+1.1.1.42,KEGG:ec00480+1.1.1.42,MetaCyc:PWY-6728,MetaCyc:PWY-5913,MetaCyc:PWY-7268 interpro_raw=IPR024084,IPR004790,IPR019818 interpro_family=IPR004790 go=GO:0006102,GO:0000287,GO:0051287,G…	100	1	1	6	6	7.23032	17.2152	3.8219			47.17	83.02	19.5	0	0	2	2	2			159	17.8239	4.99561
c68689_g1_i1:1:294:1:+	len=98	100	1	1	28	43	83.6937	32.2793	37.5012	41.0327	142.887	100	85.71	97.96	93.88	94.9	10	4	5	4	12	98	10.3615	11.561
c69183_g1_i1:1:232:2:+	len=77 acc=c69183_g1_i1:1:232:2:+ interpro_domain=IPR027417 id=c69183_g1_i1:1:232:2:+ interpro_raw=IPR001208,IPR027417 interpro_family=IPR001208 go=GO:0005524,GO:0003677,GO:0006260 def=IPR001208:Mini-chromosome maintenance, DNA-dependent ATPase; IPR027417:P-loop containing nucleoside triphosphate hydrolase;	100	1	1	8	9	12.208	18.4158	2.93111			100	77.92	36.36		0	2	5	1			77	7.63502	7.25439
c77400_g2_i1:1:286:1:+	len=95	100	1	4	41	54	33.4119	18.0347	10.6234	17.4168	34.5624	84.21	93.68	73.68	49.47	86.32	12	10	5	4	15	95	9.75483	4.50049
c80235_g1_i1:1:355:2:+	len=118 acc=c80235_g1_i1:1:355:2:+ interpro_raw=IPR006875 go=GO:0016021,GO:0016012 interpro_family=IPR006875 id=c80235_g1_i1:1:355:2:+ def=IPR006875:Sarcoglycan complex subunit protein;	100	1	1	4	4	6.0861	3.26532	6.56572	4.06528		32.2	43.22	53.39	27.12		1	1	1	1		118	12.7436	8.1626
c94080_g1_i1:1:529:2:+	len=176 acc=c94080_g1_i1:1:529:2:+ go=GO:0005576 interpro_raw=IPR005521 id=c94080_g1_i1:1:529:2:+ interpro_domain=IPR005521 def=IPR005521:Attacin, C-terminal;	100	1	77	79	135	290.521	24.7095	15.3916	268.593	130.864	64	80	56.57	68.57	73.14	33	4	2	38	17	175	18.7717	10.77
c97487_g1_i2:1:402:1:+	len=134 acc=c97487_g1_i2:1:402:1:+ interpro_family=IPR022727 interpro_raw=IPR022727 id=c97487_g1_i2:1:402:1:+ def=IPR022727:Pupal cuticle protein C1;	100	1	2	34	45	85.5284	91.2613	32.5127	21.3674	87.2349	93.28	100	97.76	88.06	87.31	7	14	5	3	9	134	13.4459	9.08545
c97655_g4_i3:97:462:1:+	len=122 acc=c97655_g4_i3:97:462:1:+ interpro_raw=IPR015876 go=GO:0016717,GO:0055114 interpro_family=IPR015876 id=c97655_g4_i3:97:462:1:+ ec=1.14.19.- def=IPR015876:Fatty acid desaturase, type 1, core;	100	2	1	9	13	12.7613	13.4658		3.83854	28.0975	61.48	60.66	0	21.31	100	3	2		1	4	122	14.1555	9.71533
c99413_g1_i2:1:217:2:+	len=72	100	1	1	5	5	9.4105		3.95397		3.72938	49.3		38.03		90.14	2		1		2	71	7.18644	4.00537
c99893_g1_i1:1149:1316:3:-	len=56	100	1	3	5	14	18.8361	12.5749	13.499		3.50906	100	81.82	81.82		76.36	3	2	1		1	55	6.26722	9.24658
c103724_g3_i10:362:544:2:-	len=61	100	2	1	4	4		8.1742	9.87899		15.0743		68.33	100		81.67		1	1		2	60	6.78358	9.70068
c88958_g1_i1:1:247:3:+	len=81 acc=c88958_g1_i1:1:247:3:+ interpro_raw=IPR015256,IPR009001 id=c88958_g1_i1:1:247:3:+ interpro_domain=IPR009001 def=IPR009001:Translation elongation factor EF1A/initiation factor IF2gamma, C-terminal;	100	1	1	9	10		26.4285	2.70439	2.99793	10.1583		98.77	32.1	20.99	95.06		5	1	1	2	81	8.69476	10.3452
c98134_g1_i5:382:1341:1:+	len=320 acc=c98134_g1_i5:382:1341:1:+ id=c98134_g1_i5:382:1341:1:+ interpro_domain=IPR023395 go=GO:0055085 interpro_family=IPR002067 interpro_raw=IPR002067,IPR023395,IPR018108 def=IPR002067:Mitochondrial carrier protein; IPR023395:Mitochondrial carrier domain;	99.69	2	1	23	30	68.4985	15.3114	6.35998	20.6924	50.7183	86.21	48.9	33.23	24.45	50.16	9	4	3	1	7	319	35.3452	9.5542
CL633Contig1:3298:5112:1:+	len=605	99.67	1	87	128	154	148.688	192.38	119.972	145.358	166.502	90.4	85.43	89.9	71.69	79.64	27	36	21	23	30	604	59.6093	9.5835
c98786_g3_i1:219:962:3:+	len=248 acc=c98786_g3_i1:219:962:3:+ id=c98786_g3_i1:219:962:3:+ interpro_domain=IPR013785 ec=5.3.1.1 pathways=MetaCyc:PWY-7003,UniPathway:UPA00109,KEGG:ec00010+5.3.1.1,MetaCyc:PWY-1042,KEGG:ec00710+5.3.1.1,MetaCyc:PWY-5484,UniPathway:UPA00138,KEGG:ec00562+5.3.1.1,KEGG:ec00051+5.3.1.1,MetaCyc:PWY-6142 interpro_raw=IPR000652,IPR022896,IPR020861,IPR013785 go=GO:0003824,GO:0008152,GO:0004807,GO:0006…	99.6	2	31	36	44	29.5249	90.1472	98.7924	33.0256	5.49095	44.13	96.76	91.09	73.28	5.26	6	15	14	7	1	247	26.6628	6.354
c102914_g1_i3:35:752:2:+	len=239 acc=c102914_g1_i3:35:752:2:+ id=c102914_g1_i3:35:752:2:+ ec=1.-.-.- interpro_raw=IPR002198,IPR016040,IPR020904,IPR002347 interpro_family=IPR002347 go=GO:0008152,GO:0016491 def=IPR002347:Glucose/ribitol dehydrogenase;	99.58	1	1	17	24	44.8968	21.5497	4.79391	26.8082	58.1	82.01	54.39	16.74	38.08	76.57	7	3	1	2	8	239	26.224	9.37842
CL8914Contig1:1:661:2:+	len=220 acc=CL8914Contig1:1:661:2:+ interpro_raw=IPR029047,IPR018181,IPR013126 interpro_family=IPR013126 id=CL8914Contig1:1:661:2:+ interpro_domain=IPR029047 def=IPR013126:Heat shock protein 70 family; IPR029047:Heat shock protein 70kD, peptide-binding domain;	99.55	1	1	19	33	46.7824	27.1627	15.7829	20.3473	71.7832	67.73	73.64	42.27	33.18	71.36	7	4	3	4	7	220	23.8837	7.38623
CL2956Contig1:326:949:2:+	len=208 acc=CL2956Contig1:326:949:2:+ interpro_raw=IPR020892,IPR024936,IPR029000,IPR002130 interpro_family=IPR024936 go=GO:0006457,GO:0000413,GO:0003755 interpro_domain=IPR002130,IPR029000 id=CL2956Contig1:326:949:2:+ ec=5.2.1.8 def=IPR002130:Cyclophilin-type peptidyl-prolyl cis-trans isomerase domain; IPR024936:Cyclophilin-type peptidyl-prolyl cis-trans isomerase; IPR029000:Cyclophilin-like doma…	99.52	1	37	38	156	163.336	165.729	180.263	163.841	86.9102	71.98	80.19	42.03	50.72	71.98	11	14	21	20	10	207	22.3823	9.43701
c106000_g1_i2:2878:3394:1:+	len=172 acc=c106000_g1_i2:2878:3394:1:+ interpro_raw=IPR014744,IPR009110 go=GO:0004402,GO:0005634,GO:0006355,GO:0016573,GO:0003713,GO:0000123 pathways= interpro_domain=IPR009110 id=c106000_g1_i2:2878:3394:1:+ ec=2.3.1.48 def=IPR009110:Nuclear receptor coactivator, interlocking;	99.42	1	25	56	81	34.4511	88.7049	57.2836	56.901	79.2208	51.16	78.49	76.16	73.26	99.42	10	22	12	7	13	172	18.9915	8.04541
c80059_g1_i2:57:1058:3:+	len=334 acc=c80059_g1_i2:57:1058:3:+ id=c80059_g1_i2:57:1058:3:+ interpro_domain=IPR027266,IPR027368,IPR027417,IPR005225 go=GO:0005515,GO:0005525 interpro_raw=IPR027417,IPR006073,IPR018948,IPR005225,IPR027266,IPR027368 def=IPR005225:Small GTP-binding protein domain; IPR027266:GTP-binding protein TrmE/Glycine cleavage system T protein, domain 1; IPR027368:tRNA modification GTPase MnmE domain 2; IP…	99.4	1	8	26	35	60.7786	38.4285	33.8428	16.5345	92.3393	71.86	47.31	41.32	33.23	67.07	9	4	5	3	8	334	36.7313	6.30322
c97966_g1_i1:1:496:2:+	len=165 acc=c97966_g1_i1:1:496:2:+ id=c97966_g1_i1:1:496:2:+ interpro_raw=IPR022727 interpro_family=IPR022727 def=IPR022727:Pupal cuticle protein C1;	99.39	1	19	43	51	54.8754	82.6542	37.2877	54.2317	86.7826	93.9	98.17	76.22	91.46	87.8	8	11	7	10	11	164	16.1924	9.74463
c99346_g2_i2:601:2070:1:+	len=490	99.39	1	15	99	125	106.986	174.412	119.31	74.2877	149.658	76.94	96.73	83.88	67.76	92.24	21	33	17	14	21	490	52.7666	10.2866
c92448_g1_i1:75:530:3:+	len=152 acc=c92448_g1_i1:75:530:3:+ id=c92448_g1_i1:75:530:3:+ interpro_raw=IPR018102,IPR001971 go=GO:0006412,GO:0005840,GO:0003735 interpro_family=IPR001971 def=IPR001971:Ribosomal protein S11;	99.34	2	23	27	62	89.8277	38.5353	68.4557	63.8374	36.0981	71.52	94.7	54.97	66.23	95.36	9	9	7	10	5	151	16.2267	10.4478
c105077_g1_i1:1:429:2:+	len=142	99.3	1	1	100	196	154.055	277.916	91.4881	67.4516	204.046	77.46	95.07	84.51	95.77	87.32	22	47	23	14	21	142	14.5731	5.09717
CL5401Contig1:1:418:3:+	len=138 acc=CL5401Contig1:1:418:3:+ interpro_domain=IPR027413 id=CL5401Contig1:1:418:3:+ pathways= interpro_family=IPR002423 go=GO:0006457,GO:0051082,GO:0005524 interpro_raw=IPR002194,IPR017998,IPR027413,IPR002423 def=IPR002423:Chaperonin Cpn60/TCP-1 family; IPR027413:GroEL-like equatorial domain;	99.28	1	1	20	28	57.5951	28.2454	17.6483	22.308	24.1292	99.28	47.1	36.96	60.14	52.17	7	5	3	4	4	138	14.782	6.55127
c108008_g1_i1:1:368:3:+	len=122	99.18	1	4	8	9	15.3949	3.33772	4.49223	6.3765	3.34126	54.1	30.33	30.33	27.87	49.18	4	1	1	2	1	122	13.4078	9.0415
c97487_g1_i1:162:518:3:+	len=119 acc=c97487_g1_i1:162:518:3:+ id=c97487_g1_i1:162:518:3:+ interpro_raw=IPR022727 interpro_family=IPR022727 def=IPR022727:Pupal cuticle protein C1;	99.16	1	18	47	57	120.74	83.4849	70.7276	30.1177	90.469	97.48	94.96	99.16	73.11	93.28	14	12	9	5	10	119	12.1151	9.18799
c104283_g1_i3:416:1812:2:+	len=465 acc=c104283_g1_i3:416:1812:2:+ id=c104283_g1_i3:416:1812:2:+ interpro_raw=IPR008160 = def=IPR008160:Collagen triple helix repeat;	99.14	2	3	168	220	215.146	348.196	129.208	130.887	268.273	76.77	91.18	76.77	83.23	85.16	41	61	30	29	28	465	45.4477	8.89502
c104283_g1_i10:416:1776:2:+	len=453 acc=c104283_g1_i10:416:1776:2:+ = interpro_raw=IPR008160 id=c104283_g1_i10:416:1776:2:+ def=IPR008160:Collagen triple helix repeat;	99.12	2	1	177	231	234.741	345.931	141.638	147.398	296.61	98.68	90.73	82.56	83.66	92.27	44	60	31	32	32	453	44.1802	8.92432
CL1752Contig1:2064:2402:3:-	len=113	99.11	1	1	4	6	14.208			18.3418	28.324	69.64			97.32	73.21	1			2	2	112	13.5281	9.84717
c102724_g3_i2:38:354:2:+	len=105 acc=c102724_g3_i2:38:354:2:+ id=c102724_g3_i2:38:354:2:+ interpro_domain=IPR011047 interpro_raw=IPR011047 def=IPR011047:Quinonprotein alcohol dehydrogenase-like superfamily;	99.05	1	1	15	17	28.8787	16.409	19.5134	9.73433	48.6188	77.14	88.57	80.95	57.14	84.76	5	3	2	1	4	105	11.4287	4.83057
c99776_g1_i1:33:338:3:+	len=102	99.01	1	2	40	56	102.856	49.7048	47.443	38.3577	104.37	97.03	93.07	91.09	89.11	98.02	16	5	6	6	14	101	9.91114	4.31006
c93902_g1_i1:949:1251:1:+	len=101	99	1	1	12	13	14.6973	8.97662	15.0528	14.5907		81	83	69	56		3	2	4	3		100	11.1908	7.91357
c97306_g1_i2:1:858:3:+	len=285 acc=c97306_g1_i2:1:858:3:+ interpro_raw=IPR011701,IPR020846 go=GO:0055085,GO:0016021 interpro_family=IPR011701 id=c97306_g1_i2:1:858:3:+ interpro_domain=IPR020846 def=IPR011701:Major facilitator superfamily; IPR020846:Major facilitator superfamily domain;	98.95	2	1	45	57	62.3773	65.0922	76.6349	44.6017	83.1849	47.02	30.88	62.11	86.67	74.74	11	11	7	8	12	285	31.6169	8.77783
c102199_g2_i3:340:615:1:-	len=92	98.9	1	1	6	8	4.40394	1.35155	7.30615	7.52472	3.58012	68.13	13.19	32.97	32.97	29.67	1	1	3	1	1	91	9.32277	4.94482
c12263_g1_i1:164:712:2:+	len=183	98.9	1	1	35	43	25.4842	42.1865	41.8137	39.357	60.2861	32.97	40.11	36.26	55.49	96.7	5	9	8	8	10	182	18.265	6.78564
c94754_g3_i2:509:780:2:+	len=90	98.89	1	1	8	8	7.13288	3.6303	8.03511	4.1529	15.2938	75.56	41.11	45.56	36.67	98.89	2	1	2	1	2	90	9.81465	4.34814
c105434_g1_i1:1:270:1:+	len=90 acc=c105434_g1_i1:1:270:1:+ ec=3.4.21.- id=c105434_g1_i1:1:270:1:+ go=GO:0006508,GO:0004252 interpro_family=IPR015500 interpro_raw=IPR023828,IPR000209,IPR015500 def=IPR015500:Peptidase S8, subtilisin-related; IPR023828:Peptidase S8, subtilisin, Ser-active site;	98.88	1	2	12	14	7.67227	37.29	31.7155	2.93269	12.5142	93.26	96.63	93.26	31.46	85.39	2	5	4	1	2	89	9.13789	10.9604
c91687_g1_i1:1:534:1:+	len=178 acc=c91687_g1_i1:1:534:1:+ go=GO:0046872,GO:0000166 interpro_family=IPR006415 interpro_raw=IPR004014,IPR023298,IPR008250 id=c91687_g1_i1:1:534:1:+ interpro_domain=IPR023298 def=IPR006415:P-type ATPase, subfamily IIIB; IPR023298:P-type ATPase, transmembrane domain;	98.88	1	2	10	14	24.3559	43.0122			3.95976	56.74	83.71	0	0	21.35	5	4			1	178	19.8654	5.14795
CL550Contig1:1:526:2:+	len=175	98.85	2	23	27	36	24.2784	46.8499	27.2745	31.6334	42.4681	90.23	72.99	89.08	50	40.23	5	10	6	6	6	174	17.6738	3.61182
c105897_g2_i2:1:262:3:+	len=86 acc=c105897_g2_i2:1:262:3:+ interpro_raw=IPR013519 = pathways= id=c105897_g2_i2:1:262:3:+ def=IPR013519:Integrin alpha beta-propellor;	98.84	1	1	10	11	13.1488	9.8974		8.92361	24.0018	55.81	58.14	0	72.09	98.84	2	2		2	5	86	9.5536	5.45264
c105925_g1_i2:1:254:3:+	len=84	98.8	1	50	77	96	145.315	113.496	65.5209	66.3712	61.3464	98.8	95.18	92.77	98.8	87.95	26	21	16	13	10	83	7.68886	6.59521
CL8544Contig1:1:738:1:+	len=246 acc=CL8544Contig1:1:738:1:+ interpro_domain=IPR013968 id=CL8544Contig1:1:738:1:+ ec=1.-.-.- interpro_raw=IPR016040,IPR002198,IPR020904,IPR013968,IPR002347 interpro_family=IPR002347 go=GO:0008152,GO:0016491 def=IPR002347:Glucose/ribitol dehydrogenase; IPR013968:Polyketide synthase, ketoreductase domain;	98.78	1	2	20	28	36.3327	42.6779	24.5587	17.1693	20.3112	61.22	84.9	33.47	41.22	37.96	5	10	3	2	3	245	25.9717	7.18115
c105218_g2_i6:1099:1821:1:+	len=241	98.75	2	65	85	131	84.3105	75.7112	117.075	110.914	125.274	95	79.58	72.5	55	93.33	16	18	28	17	22	240	24.0399	5.45264
c82255_g1_i1:1:238:1:+	len=79	98.73	1	1	16	21	28.9069	18.5942	16.4307	16.2086	38.8455	89.87	83.54	68.35	62.03	93.67	5	3	3	3	5	79	8.62562	12.5425
c94311_g1_i1:1:473:1:+	len=157 acc=c94311_g1_i1:1:473:1:+ id=c94311_g1_i1:1:473:1:+ interpro_family=IPR015725 go=GO:0005515 interpro_raw=IPR013783,IPR013098,IPR003599,IPR007110,IPR003598 def=IPR015725:Telokin/Myosin light chain kinase;	98.73	1	1	16	18	18.8173	19.0829	10.0112	4.69628	50.0678	65.61	73.89	50.32	17.83	84.71	3	4	2	1	6	157	17.571	5.14795
c99843_g3_i1:1:472:2:+	len=157	98.73	1	1	6	7	5.61358				34.6907	28.03		0	0	98.73	1				5	157	16.3911	4.37354
c94870_g1_i2:1:937:2:+	len=312 acc=c94870_g1_i2:1:937:2:+ id=c94870_g1_i2:1:937:2:+ go=GO:0005643,GO:0006913 interpro_family=IPR024882 interpro_raw=IPR024882 def=IPR024882:Nucleoporin p58/p45;	98.71	1	4	68	84	113.649	95.1612	60.9482	61.4292	103.024	72.03	79.74	50.16	62.06	47.59	19	18	10	16	12	311	33.8983	7.18115
c114323_g1_i1:1:228:1:+	len=76	98.68	1	1	2	2	13.2505					98.68		0			2					76	8.26545	10.2573
c88359_g2_i1:1:228:2:+	len=75 acc=c88359_g2_i1:1:228:2:+ id=c88359_g2_i1:1:228:2:+ ec=2.4.1.- interpro_raw=IPR003674 go=GO:0006486,GO:0016020,GO:0004576 interpro_family=IPR003674 pathways=UniPathway:UPA00378 def=IPR003674:Oligosaccharyl transferase, STT3 subunit;	98.67	1	3	6	7	16.7346	13.8324		6.01822	6.4059	94.67	96		65.33	68	2	2		2	1	75	7.9731	7.98682
CL521Contig1:1608:2051:1:-	len=148 acc=CL521Contig1:1608:2051:1:- interpro_raw=IPR030491,IPR000814,IPR012295 go=GO:0006352,GO:0003677 interpro_family=IPR000814 id=CL521Contig1:1608:2051:1:- def=IPR000814:TATA-box binding protein; IPR030491:TATA-box binding protein, conserved site;	98.64	1	1	21	27	20.0764	19.5729	10.2162	23.8982	71.6468	72.11	63.95	35.37	38.78	84.35	4	5	3	5	6	147	15.9593	9.33447
c91452_g1_i1:1:435:1:+	len=145	98.61	1	62	82	143	194.078	91.6729	65.4977	150.588	286.902	87.5	98.61	80.56	88.89	86.11	24	15	12	19	36	144	13.6122	6.96143
CL2102Contig1:565:987:1:+	len=141 acc=CL2102Contig1:565:987:1:+ interpro_domain=IPR002379 id=CL2102Contig1:565:987:1:+ interpro_raw=IPR000454,IPR020537,IPR002379 interpro_family=IPR000454 go=GO:0033177,GO:0015078,GO:0015986,GO:0045263,GO:0015991 def=IPR000454:ATPase, F0 complex, subunit C; IPR002379:V-ATPase proteolipid subunit C-like domain;	98.57	1	51	67	88	186.911	92.4868	64.6974	28.1426	199.333	82.86	86.43	71.43	67.86	92.86	22	14	12	5	24	140	14.6788	10.1255
c105960_g1_i2:831:2930:3:+	len=700 acc=c105960_g1_i2:831:2930:3:+ id=c105960_g1_i2:831:2930:3:+ = interpro_raw=IPR008160 def=IPR008160:Collagen triple helix repeat;	98.57	2	208	227	293	417.304	450.788	295.624	191.946	325.912	88.56	85.84	72.39	73.82	78.25	62	71	44	35	49	699	68.6697	9.64209
c98134_g1_i4:330:1370:3:+	len=347 acc=c98134_g1_i4:330:1370:3:+ interpro_raw=IPR018108,IPR023395 = interpro_domain=IPR023395 id=c98134_g1_i4:330:1370:3:+ def=IPR023395:Mitochondrial carrier domain;	98.55	2	1	32	36	54.3683	29.9082	19.6961	6.6069	92.2124	83.24	64.74	38.15	23.12	56.07	8	6	5	1	12	346	38.3486	9.30518
c103353_g1_i4:243:653:3:+	len=137	98.53	1	5	9	9	3.60519		15.6225	7.52656		27.94	0	62.5	52.21	0	1		4	3		136	14.5253	9.99365
c106903_g1_i1:1:595:2:+	len=198	98.48	1	2	34	48	86.6413	56.5127	35.1581	47.173	75.077	67.17	77.78	82.32	88.38	98.48	11	6	5	6	10	198	20.9339	4.98291
CL4568Contig1:1:198:1:+	len=66	98.46	1	43	49	72	43.2015	33.7461	29.4471	26.9892	33.8012	96.92	66.15	75.38	69.23	76.92	16	11	10	9	12	65	6.41999	4.00537
CL1449Contig1:190:771:1:+	len=194 acc=CL1449Contig1:190:771:1:+ interpro_raw=IPR021625 interpro_family=IPR021625 id=CL1449Contig1:190:771:1:+ def=IPR021625:Fbxo7/PI31 domain;	98.45	1	5	12	13	6.52032	22.5667	36.0701	4.2378	18.8614	37.31	38.86	81.87	11.4	44.56	2	3	4	1	2	193	20.9947	6.01123
c104235_g3_i5:1:196:2:+	len=65	98.44	1	1	2	2	2.35685				4.20572	45.31		0		68.75	1				1	64	7.37761	8.03076
c105689_g1_i2:834:2150:3:+	len=439	98.4	1	30	70	93	79.7858	128.491	61.8035	47.4945	118.178	65.3	87.21	65.98	49.32	70.55	15	21	12	8	21	438	47.2097	9.67139
CL8169Contig1:1302:1484:3:+	len=61	98.33	1	1	1	1		5.35914					98.33			0		1				60	7.20776	9.87646
c88540_g1_i1:24:200:3:+	len=59	98.28	1	2	3	3	3.114	8.59881				41.38	91.38				1	2				58	6.73543	8.17725
CL1355Contig1:339:665:3:+	len=109 acc=CL1355Contig1:339:665:3:+ interpro_raw=IPR016349,IPR008387 interpro_family=IPR008387 go=GO:0000276,GO:0015078,GO:0015986 id=CL1355Contig1:339:665:3:+ def=IPR008387:ATPase, F0 complex, subunit F6, mitochondrial;	98.15	1	6	8	11	22.3471	19.0329		15.3044	9.77604	96.3	59.26		76.85	65.74	4	3		2	1	108	11.9123	8.11865
c104323_g2_i1:1:973:3:+	len=323	98.14	1	57	74	92	113.178	101.109	65.6279	80.2472	64.4235	88.24	86.07	77.09	70.59	65.94	22	15	15	16	13	323	31.4885	4.75439
c106130_g1_i3:77:1338:2:+	len=420 acc=c106130_g1_i3:77:1338:2:+ go=GO:0005488 interpro_raw=IPR016024,IPR011989 id=c106130_g1_i3:77:1338:2:+ interpro_domain=IPR016024 def=IPR016024:Armadillo-type fold;	98.1	1	18	40	58	51.6258	74.8682	33.4662	24.3941	148.611	64.05	34.76	16.67	55.95	58.1	9	11	6	4	18	420	45.8503	8.68994
c98588_g1_i2:487:1875:1:+	len=463 acc=c98588_g1_i2:487:1875:1:+ interpro_domain=IPR001452,IPR013606 id=c98588_g1_i2:487:1875:1:+ interpro_family=IPR027681 go=GO:0005515,GO:0007009 interpro_raw=IPR013606,IPR027681,IPR001452 def=IPR001452:SH3 domain; IPR013606:IMD/I-BAR domain; IPR027681:I-BAR domain containing protein IRSp53/IRTKS/Pinkbar;	98.05	2	17	30	31	26.5669	34.7303	25.6432	50.8239	33.5684	38.53	65.37	40.48	72.73	54.55	5	8	6	7	5	462	51.7139	8.63135
c105711_g1_i1:93:245:3:+	len=51	98	1	1	1	5				32.4943			0		98	0				1		50	4.96775	4.34814
c61693_g1_i1:1:153:1:+	len=51	98	1	1	2	2			8.95767		4.4478			98		52			1		1	50	5.99618	11.4731
c101733_g2_i1:1:297:1:+	len=99	97.98	1	22	35	37	12.0128	5.07247	28.7554	49.2433	5.28196	77.78	36.36	90.91	95.96	46.46	6	4	12	11	4	99	7.43134	9.53955
c84429_g1_i1:66:359:3:+	len=98	97.94	1	2	11	14	42.8915	15.12	9.5437	5.35558	10.433	94.85	93.81	82.47	57.73	71.13	4	3	2	1	2	97	10.7876	8.1626
c98651_g4_i1:1:429:2:+	len=142 acc=c98651_g4_i1:1:429:2:+ id=c98651_g4_i1:1:429:2:+ = interpro_raw=IPR008160 def=IPR008160:Collagen triple helix repeat;	97.89	1	32	70	78	133.975	101.337	61.9337	22.3406	89.9121	91.55	97.18	66.9	77.46	90.14	25	19	13	6	13	142	13.1726	4.52588
c98722_g1_i1:89:646:2:+	len=186 acc=c98722_g1_i1:89:646:2:+ id=c98722_g1_i1:89:646:2:+ interpro_family=IPR001436,IPR031107 interpro_raw=IPR031107,IPR001436,IPR002068,IPR008978 def=IPR001436:Alpha crystallin/Heat shock protein; IPR031107:Small heat shock protein HSP20;	97.84	2	71	77	397	395.167	283.169	761.632	554.108	189.211	82.16	71.35	96.76	92.97	75.68	19	18	55	42	13	185	21.3999	6.7124
c97112_g2_i1:1603:1872:1:+	len=90 acc=c97112_g2_i1:1603:1872:1:+ interpro_raw=IPR001816,IPR014039 interpro_family=IPR001816 go=GO:0003746,GO:0006414,GO:0005622 id=c97112_g2_i1:1603:1872:1:+ def=IPR001816:Translation elongation factor EFTs/EF1B;	97.75	1	1	7	9	9.94016	5.24706	3.61838		4.14879	73.03	56.18	87.64	0	52.81	2	2	2		1	89	9.75717	5.50342
c104509_g2_i2:137:406:2:+	len=90	97.75	1	2	4	5		15.3633		2.80799			76.4		25.84	0		3		1		89	9.62876	4.81787
c91487_g1_i1:207:341:3:+	len=45	97.73	1	3	3	5			7.04064	13.1389				95.45	70.45				2	2		44	4.90528	4.65283
c103481_g4_i8:1:1048:2:+	len=349 acc=c103481_g4_i8:1:1048:2:+ ec=1.3.99.3 interpro_domain=IPR009100,IPR013786,IPR009075 id=c103481_g4_i8:1:1048:2:+ go=GO:0016627,GO:0050660,GO:0055114,GO:0003995,GO:0008152 interpro_raw=IPR006091,IPR009100,IPR013786,IPR009075,IPR006089 def=IPR009075:Acyl-CoA dehydrogenase/oxidase C-terminal; IPR009100:Acyl-CoA dehydrogenase/oxidase, N-terminal and middle domain; IPR013786:Acyl-CoA dehydro…	97.7	1	1	29	41	38.778	53.318	26.1731	14.2782	33.9351	50.86	57.47	63.79	44.54	60.92	6	9	6	5	7	348	37.4251	8.36768
c95173_g1_i1:1:261:1:+	len=87 acc=c95173_g1_i1:1:261:1:+ go=GO:0005515,GO:0006289,GO:0005634 interpro_family=IPR004806 interpro_raw=IPR009060,IPR015940,IPR000449,IPR004806 id=c95173_g1_i1:1:261:1:+ interpro_domain=IPR009060 def=IPR004806:UV excision repair protein Rad23; IPR009060:UBA-like;	97.67	1	35	52	56	20.5124	41.2298	43.2453	41.2648	8.03027	55.81	79.07	55.81	73.26	33.72	7	14	14	14	5	86	8.6022	4.51318
c113278_g1_i1:1:515:2:+	len=171 acc=c113278_g1_i1:1:515:2:+ pathways=KEGG:ec00983+1.1.1.205,KEGG:ec00230+1.1.1.205,MetaCyc:PWY-6596,UniPathway:UPA00601,MetaCyc:PWY-7221,MetaCyc:PWY-5695 interpro_family=IPR005990 go=GO:0003938,GO:0003824,GO:0006164,GO:0055114 interpro_raw=IPR005990,IPR015813,IPR013785,IPR001093,IPR000644 ec=1.1.1.205 interpro_domain=IPR013785,IPR015813 id=c113278_g1_i1:1:515:2:+ def=IPR005990:Inosine-5'-…	97.66	1	7	11	16	4.80646	39.0794	14.3779	11.5938		19.88	90.64	54.39	40.35		1	6	4	3		171	18.6506	5.13525
c64313_g1_i1:1:257:2:+	len=85 acc=c64313_g1_i1:1:257:2:+ interpro_domain=IPR027417 id=c64313_g1_i1:1:257:2:+ interpro_raw=IPR027417 def=IPR027417:P-loop containing nucleoside triphosphate hydrolase;	97.65	1	2	6	7	9.1146	13.5633	4.70395		3.26464	85.88	80	25.88	0	54.12	2	3	1		1	85	9.31978	5.8335
c96884_g1_i1:1:383:3:+	len=127 acc=c96884_g1_i1:1:383:3:+ interpro_family=IPR013126 interpro_raw=IPR018181,IPR013126 id=c96884_g1_i1:1:383:3:+ def=IPR013126:Heat shock protein 70 family;	97.64	2	1	7	11		3.6962	4.93997	29.0216	10.2155	0	33.07	24.41	91.34	46.46		1	2	5	1	127	13.8068	8.11865
c90373_g2_i1:1:490:2:+	len=163	97.53	1	13	31	39	20.4231	19.8837	17.1338	36.5095	42.7711	68.52	82.72	96.3	81.48	93.83	3	10	8	7	8	162	15.233	4.58936
c94063_g1_i1:143:622:2:+	len=160 acc=c94063_g1_i1:143:622:2:+ id=c94063_g1_i1:143:622:2:+ interpro_domain=IPR002379 go=GO:0015991,GO:0015078,GO:0033177,GO:0033179 interpro_family=IPR000245 interpro_raw=IPR002379,IPR011555,IPR000245 def=IPR000245:V-ATPase proteolipid subunit; IPR002379:V-ATPase proteolipid subunit C-like domain;	97.48	2	24	43	46	48.6968	35.5221	33.0992	42.4846	53.7334	82.39	72.33	62.89	75.47	88.68	10	9	8	8	8	159	16.1777	7.23975
c75696_g1_i1:1:589:2:+	len=196 acc=c75696_g1_i1:1:589:2:+ interpro_raw=IPR002004 go=GO:0003723 id=c75696_g1_i1:1:589:2:+ interpro_domain=IPR002004 def=IPR002004:Polyadenylate-binding protein/Hyperplastic disc protein;	97.44	1	2	27	54	46.6264	53.5126	25.1293	18.5364	23.6016	85.13	49.74	64.62	57.95	68.72	8	8	5	5	5	195	21.5002	9.33447
CL2395Contig1:1:584:3:+	len=194	97.41	1	18	36	43	56.7398	49.1782	31.1136	49.1908	63.2288	54.4	77.72	64.77	92.75	80.31	9	7	6	10	9	193	19.3102	12.4399
c32230_g1_i1:1:229:3:+	len=75 acc=c32230_g1_i1:1:229:3:+ id=c32230_g1_i1:1:229:3:+ go=GO:0055085,GO:0015075,GO:0016020,GO:0006811 interpro_family=IPR004686 interpro_raw=IPR004686 def=IPR004686:Tricarboxylate/iron carrier;	97.33	1	2	6	7	3.90414	12.8969		5.67695	8.29021	58.67	85.33	0	61.33	81.33	1	3		1	1	75	8.17152	10.1108
c88875_g2_i1:1:335:1:+	len=111 acc=c88875_g2_i1:1:335:1:+ ec=2.7.1.11 interpro_domain=IPR000023 id=c88875_g2_i1:1:335:1:+ go=GO:0003872,GO:0006096 interpro_raw=IPR000023 pathways=MetaCyc:PWY-1861,KEGG:ec00010+2.7.1.11,KEGG:ec00052+2.7.1.11,MetaCyc:PWY-5484,MetaCyc:PWY-1042,UniPathway:UPA00109,KEGG:ec00051+2.7.1.11,KEGG:ec00030+2.7.1.11,MetaCyc:PWY-7385,KEGG:ec00680+2.7.1.11 def=IPR000023:Phosphofructokinase domain;	97.3	1	2	12	14	11.6623	9.4292	25.5702	9.76987	1.9839	62.16	53.15	95.5	71.17	15.32	3	2	4	2	1	111	11.7642	8.63135
c105656_g3_i1:301:633:1:+	len=111 acc=c105656_g3_i1:301:633:1:+ id=c105656_g3_i1:301:633:1:+ interpro_raw=IPR007632 interpro_family=IPR007632 def=IPR007632:Anoctamin;	97.27	1	3	4	5	8.74353	2.35448			8.33248	67.27	17.27			53.64	2	1			1	110	12.5556	8.49951
CL125Contig2:1140:1250:3:+	len=37	97.22	1	2	3	3	3.89511	2.42661		3.11157		69.44	61.11		55.56		1	1		1		36	3.93193	4.75439
c103396_g1_i1:445:1092:1:+	len=216 acc=c103396_g1_i1:445:1092:1:+ interpro_raw=IPR024880 interpro_family=IPR024880 go=GO:0048208 id=c103396_g1_i1:445:1092:1:+ def=IPR024880:COPII coat assembly protein, Sec16;	97.21	1	1	24	31	22.4403	28.1507	7.12353	37.096	49.7073	77.67	69.77	19.07	51.16	60.47	6	7	3	4	6	215	23.2476	8.22119
CL8221Contig1:1:539:3:+	len=179 acc=CL8221Contig1:1:539:3:+ id=CL8221Contig1:1:539:3:+ interpro_raw=IPR000618 go=GO:0042302 interpro_family=IPR000618 def=IPR000618:Insect cuticle protein;	97.19	1	8	13	19	12.5663	18.7278	3.34392	9.36009	34.69	62.36	53.37	14.61	33.71	53.93	3	4	1	2	6	178	18.2174	8.95361
c105223_g4_i2:375:584:3:+	len=70	97.14	1	1	11	15	30.4905	3.03031	15.8997	15.3627		97.14	34.29	58.57	67.14		5	1	4	4		70	6.80462	9.01221
c111566_g1_i1:1:315:1:+	len=105 acc=c111566_g1_i1:1:315:1:+ id=c111566_g1_i1:1:315:1:+ interpro_family=IPR000618 go=GO:0042302 interpro_raw=IPR000618 def=IPR000618:Insect cuticle protein;	97.12	1	1	7	8	4.81996	10.4191	19.8933	16.0185		43.27	86.54	97.12	75.96	0	1	1	3	3		104	10.9045	7.57666
c103275_g1_i3:15:1046:3:+	len=344 acc=c103275_g1_i3:15:1046:3:+ go=GO:0003723,GO:0005488 interpro_raw=IPR016024,IPR011989,IPR001313 interpro_domain=IPR016024 id=c103275_g1_i3:15:1046:3:+ def=IPR016024:Armadillo-type fold;	97.09	1	13	74	83	114.924	130.244	103.245	48.8806	81.5132	89.53	70.35	56.98	48.84	45.64	20	19	16	11	13	344	37.753	8.70459
c98502_g1_i1:507:818:3:+	len=104 acc=c98502_g1_i1:507:818:3:+ interpro_family=IPR009432 interpro_raw=IPR009432 id=c98502_g1_i1:507:818:3:+ def=IPR009432:Protein of unknown function DUF1075;	97.09	1	2	9	17	25.2542		8.63665	9.69947	17.0641	97.09		43.69	58.25	80.58	3		2	2	2	103	11.8852	10.1108
c105076_g1_i3:151:1272:1:+	len=374	97.06	1	4	92	123	97.1473	76.9354	113.272	232.923	61.6104	70.05	79.14	81.02	91.18	61.5	22	15	24	30	12	374	39.7162	9.99365
c104177_g2_i1:1:305:1:+	len=101 acc=c104177_g2_i1:1:305:1:+ id=c104177_g2_i1:1:305:1:+ interpro_raw=IPR010629 = def=IPR010629:Insect allergen-related;	97.03	1	1	8	8	10.6159	3.75697	17.3424		7.48648	71.29	32.67	68.32		55.45	2	1	3		2	101	10.9985	3.70068
c100907_g2_i1:751:951:1:+	len=67 acc=c100907_g2_i1:751:951:1:+ interpro_domain=IPR012336 id=c100907_g2_i1:751:951:1:+ interpro_raw=IPR012336,IPR004045 go=GO:0005515 def=IPR012336:Thioredoxin-like fold;	97.01	1	2	5	6	5.14409	9.84556	2.64493		4.20634	62.69	62.69	55.22		58.21	1	2	1		1	67	7.49987	7.41553
c99278_g2_i1:347:643:2:+	len=99 acc=c99278_g2_i1:347:643:2:+ interpro_family=IPR024130 interpro_raw=IPR024130 id=c99278_g2_i1:347:643:2:+ def=IPR024130:DAP1/DAPL1;	96.94	1	14	16	28	54.3396	16.0748	48.1297	23.9424	39.6264	86.73	75.51	93.88	96.94	80.61	5	2	5	3	4	98	10.3424	9.75928
c94018_g3_i1:1:780:1:+	len=260 acc=c94018_g3_i1:1:780:1:+ interpro_raw=IPR013103 pathways=KEGG:ec00240+2.7.7.7,KEGG:ec00230+2.7.7.7 interpro_domain=IPR013103 id=c94018_g3_i1:1:780:1:+ def=IPR013103:Reverse transcriptase, RNA-dependent DNA polymerase;	96.92	1	9	11	11	9.11459	30.9478	18.2789	7.13935		26.92	85	45.77	20.77		1	6	3	1		260	29.1904	9.61279
CL6839Contig1:1:491:3:+	len=163	96.91	1	7	15	18	9.44102	21.6136	17.9519	6.3761	9.24504	37.65	90.74	77.16	67.28	43.83	2	5	4	3	3	162	17.497	8.96826
CL964Contig2:1713:2006:3:+	len=98	96.91	1	2	20	24	41.8624	30.9188	22.1104	9.95871	17.1115	87.63	85.57	87.63	41.24	87.63	6	6	3	2	3	97	10.3943	8.04541
CL1387Contig1:3689:4459:2:-	len=257 acc=CL1387Contig1:3689:4459:2:- interpro_raw=IPR020904,IPR002347,IPR002198,IPR016040 interpro_family=IPR002347 go=GO:0008152,GO:0016491 id=CL1387Contig1:3689:4459:2:- ec=1.-.-.- def=IPR002347:Glucose/ribitol dehydrogenase;	96.88	1	3	13	13	13.5796	14.3904	33.524		23.6976	35.16	45.7	83.98		62.89	3	2	4		4	256	27.1064	8.95361
c102857_g2_i2:226:516:1:+	len=97	96.88	1	2	3	3		12.3506		4.70889			96.88		44.79			2		1		96	10.3562	6.72705
c104015_g1_i2:1:944:3:+	len=314 acc=c104015_g1_i2:1:944:3:+ interpro_raw=IPR012791,IPR004164,IPR004165 interpro_family=IPR004165 go=GO:0008410,GO:0008152 id=c104015_g1_i2:1:944:3:+ ec=2.8.3.-:succinyl-CoA def=IPR004165:Coenzyme A transferase family I;	96.81	1	10	21	33	22.8723	22.122	20.104	23.1433	31.6207	49.84	46.65	38.98	52.4	55.59	5	4	3	5	5	313	33.8973	5.50342
c87993_g1_i1:1:97:2:+	len=32 acc=c87993_g1_i1:1:97:2:+ ec=3.5.1.28 interpro_domain=IPR002502 id=c87993_g1_i1:1:97:2:+ go=GO:0008745,GO:0009253 interpro_raw=IPR002502 def=IPR002502:N-acetylmuramoyl-L-alanine amidase domain;	96.77	1	3	3	14		13.5563	10.5451	19.0112	7.09075		48.39	48.39	96.77	45.16		2	2	3	1	31	3.47065	8.25049
c92808_g2_i1:455:640:2:+	len=62	96.72	1	1	3	3					5.64211		0	0		96.72					1	61	6.78038	7.18115
c98296_g1_i4:1:277:3:+	len=91 acc=c98296_g1_i4:1:277:3:+ id=c98296_g1_i4:1:277:3:+ interpro_domain=IPR011527 interpro_raw=IPR011527 go=GO:0016021,GO:0005524,GO:0055085,GO:0042626,GO:0006810 def=IPR011527:ABC transporter type 1, transmembrane domain;	96.7	1	2	20	27	37.2587	22.0882	20.3619	21.7699	83.2858	84.62	73.63	76.92	93.41	90.11	7	4	2	2	7	91	9.96139	10.0962
c92231_g1_i1:121:936:1:+	len=272 acc=c92231_g1_i1:121:936:1:+ interpro_family=IPR007726 interpro_raw=IPR007726 id=c92231_g1_i1:121:936:1:+ def=IPR007726:SS18 family;	96.68	1	1	57	71	22.1382	70.2701	81.4623	72.4332	9.91286	34.69	80.81	77.49	49.45	22.88	8	21	19	13	3	271	29.517	8.95361
c103771_g1_i1:1:365:3:+	len=121 acc=c103771_g1_i1:1:365:3:+ interpro_domain=IPR027417 id=c103771_g1_i1:1:365:3:+ interpro_raw=IPR027417 def=IPR027417:P-loop containing nucleoside triphosphate hydrolase;	96.67	1	2	16	21	29.7876	37.5666	13.6614	6.24261	12.8615	94.17	92.5	52.5	55.83	46.67	4	6	3	3	2	120	13.0987	9.43701
c102253_g8_i2:11:1180:2:+	len=390 acc=c102253_g8_i2:11:1180:2:+ interpro_family=IPR009146 go=GO:0005515,GO:0006355,GO:0005634 interpro_raw=IPR001680,IPR019775,IPR009146,IPR015943,IPR017986 interpro_domain=IPR015943 id=c102253_g8_i2:11:1180:2:+ def=IPR009146:Groucho/transducin-like enhancer; IPR015943:WD40/YVTN repeat-like-containing domain;	96.66	1	8	26	27	42.3946	36.2907	15.4098	38.981	10.3137	60.67	81.49	33.93	69.15	19.02	6	7	4	8	2	389	41.7867	6.91748
c97559_g1_i1:124:393:1:+	len=90 acc=c97559_g1_i1:124:393:1:+ id=c97559_g1_i1:124:393:1:+ interpro_domain=IPR014352 go=GO:0000062 interpro_raw=IPR022408,IPR000582,IPR014352 def=IPR014352:FERM/acyl-CoA-binding protein, 3-helical bundle;	96.63	1	24	25	124	147.861	124.884	142.934	165.834	111.417	95.51	95.51	95.51	96.63	31.46	6	8	13	15	3	89	9.94212	8.89502
c49339_g1_i1:1:265:1:+	len=88 acc=c49339_g1_i1:1:265:1:+ interpro_raw=IPR027417,IPR003960,IPR003959 go=GO:0005524 id=c49339_g1_i1:1:265:1:+ interpro_domain=IPR027417,IPR003959 def=IPR003959:ATPase, AAA-type, core; IPR027417:P-loop containing nucleoside triphosphate hydrolase;	96.59	1	3	8	10	31.5123	5.23879	6.39943	7.1557	13.6046	92.05	86.36	86.36	86.36	55.68	5	1	1	1	2	88	9.91733	8.67529
c99598_g1_i1:1:531:1:+	len=177	96.59	1	1	10	10	5.41273	10.9516	14.9156	6.72936	7.53926	18.18	49.43	56.25	45.45	57.95	2	1	3	2	2	176	18.9485	7.48877
c100321_g1_i2:254:592:2:+	len=113 acc=c100321_g1_i2:254:592:2:+ interpro_domain=IPR020683 id=c100321_g1_i2:254:592:2:+ interpro_raw=IPR002110,IPR020683 go=GO:0005515 def=IPR020683:Ankyrin repeat-containing domain;	96.43	1	1	3	4	9.51457	5.28801				61.61	96.43				2	2				112	11.8163	6.52197
c93553_g3_i1:1:257:3:+	len=85	96.43	1	2	8	11	11.1945	6.30293	3.06585	6.29478	4.2194	78.57	92.86	51.19	53.57	27.38	3	2	1	2	1	84	9.09655	10.2573
c57283_g1_i1:1:335:1:+	len=111	96.4	1	39	40	57	38.912	27.8921	49.0531	14.7856	22.3698	95.5	87.39	96.4	58.56	87.39	14	10	11	6	6	111	11.683	8.85107
c74020_g2_i1:1:252:1:+	len=84	96.39	1	4	5	8	7.44635	10.7243	13.8069	2.63814	14.6672	87.95	87.95	87.95	21.69	96.39	1	1	2	1	3	83	8.87868	7.34229
c85922_g1_i1:1:744:2:+	len=247 acc=c85922_g1_i1:1:744:2:+ id=c85922_g1_i1:1:744:2:+ interpro_domain=IPR001747 go=GO:0005319,GO:0006869 interpro_raw=IPR001747,IPR011030,IPR015816,IPR015819 pathways= def=IPR001747:Lipid transport protein, N-terminal;	96.36	1	243	248	2390	3835.93	2862.64	2266.64	2405.99	2556.13	83	92.31	76.52	79.76	83	144	148	132	140	114	247	27.164	8.23584
c103918_g5_i1:190:762:1:+	len=191 acc=c103918_g5_i1:190:762:1:+ id=c103918_g5_i1:190:762:1:+ interpro_family=IPR022730 interpro_raw=IPR022730 def=IPR022730:DAZ associated protein 2;	96.32	2	8	21	22	28.1403	16.1	14.0292	5.66769	19.6414	94.74	59.47	55.26	23.16	44.74	7	5	3	2	5	190	19.7607	8.29443
c100163_g2_i5:1:326:3:+	len=108	96.3	1	5	56	128	136.102	99.7638	77.9229	66.0837	185.497	84.26	88.89	87.04	95.37	88.89	14	14	9	12	25	108	10.9901	5.49072
c95983_g1_i2:105:431:3:+	len=109 acc=c95983_g1_i2:105:431:3:+ id=c95983_g1_i2:105:431:3:+ interpro_raw=IPR013970,IPR012340 go=GO:0006281,GO:0006260,GO:0005634,GO:0006310,GO:0003677 interpro_family=IPR013970 def=IPR013970:Replication factor A protein 3;	96.3	1	6	8	12	4.10765	13.6874	2.70107	13.2115	19.5702	27.78	50	12.04	32.41	81.48	1	2	1	3	3	108	11.6458	8.30908
c101312_g1_i10:85:726:1:+	len=214 acc=c101312_g1_i10:85:726:1:+ interpro_raw=IPR011009 id=c101312_g1_i10:85:726:1:+ interpro_domain=IPR011009 def=IPR011009:Protein kinase-like domain;	96.24	1	3	18	22	9.70893	33.4163	4.2423	23.5263	5.71301	25.35	64.79	20.66	64.32	48.36	2	9	1	4	3	213	23.8519	10.0669
c92420_g2_i1:1:241:3:+	len=79 acc=c92420_g2_i1:1:241:3:+ interpro_raw=IPR001650,IPR027417 id=c92420_g2_i1:1:241:3:+ interpro_domain=IPR027417,IPR001650 def=IPR001650:Helicase, C-terminal; IPR027417:P-loop containing nucleoside triphosphate hydrolase;	96.2	1	2	11	12	19.4623	17.8573	19.4564	5.86146	2.61011	77.22	44.3	96.2	74.68	25.32	2	3	4	1	1	79	8.15838	9.62744
c94820_g1_i1:1:478:2:+	len=159	96.2	1	6	10	14	33.804	8.19506	31.4758	26.6899	4.82299	80.38	32.91	79.75	94.3	42.41	3	1	4	3	1	158	16.9918	9.80322
c98754_g4_i2:1:392:3:+	len=130 acc=c98754_g4_i2:1:392:3:+ interpro_domain=IPR020683 id=c98754_g4_i2:1:392:3:+ interpro_raw=IPR002110,IPR020683 go=GO:0005515 def=IPR020683:Ankyrin repeat-containing domain;	96.12	1	1	12	12	8.15055	22.9915	14.2175	11.8447	5.23266	61.24	89.92	62.02	78.29	31.78	2	4	2	2	2	129	13.7673	6.93213
c94354_g2_i1:314:775:2:+	len=154 acc=c94354_g2_i1:314:775:2:+ id=c94354_g2_i1:314:775:2:+ interpro_domain=IPR025398 interpro_raw=IPR025398 def=IPR025398:Domain of unknown function DUF4371;	96.08	1	4	9	11	10.1774	16.2544		15.7944		76.47	51.63		62.09		3	3		4		153	17.648	5.85889
c42091_g1_i1:1:599:3:+	len=199 acc=c42091_g1_i1:1:599:3:+ id=c42091_g1_i1:1:599:3:+ ec=1.1.1.27 interpro_raw=IPR015955,IPR022383,IPR001236,IPR018177,IPR016040,IPR001557 go=GO:0016491,GO:0019752,GO:0005975,GO:0016616,GO:0003824,GO:0004459,GO:0055114 interpro_family=IPR001557 pathways=MetaCyc:PWY-5481,KEGG:ec00010+1.1.1.27,UniPathway:UPA00554,KEGG:ec00620+1.1.1.27,KEGG:ec00270+1.1.1.27,MetaCyc:PWY-6901,KEGG:ec00640+1.1.1…	95.96	1	3	22	28	61.8064	30.0721	11.5009	10.4954	63.394	45.96	89.39	35.86	38.89	62.12	7	5	2	1	7	198	20.9196	6.78564
c95730_g2_i1:1:524:3:+	len=174 acc=c95730_g2_i1:1:524:3:+ interpro_raw=IPR000618 interpro_family=IPR000618 go=GO:0042302 id=c95730_g2_i1:1:524:3:+ def=IPR000618:Insect cuticle protein;	95.95	1	3	5	7	2.80133	32.4245	2.72822		8.21222	12.14	80.35	12.14		39.31	1	3	1		1	173	18.5725	6.30322
CL9010Contig1:113:1078:2:+	len=322 acc=CL9010Contig1:113:1078:2:+ id=CL9010Contig1:113:1078:2:+ interpro_raw=IPR017986,IPR020472,IPR015943,IPR001680,IPR019775 go=GO:0005515 interpro_family=IPR017399 def=IPR017399:WD repeat protein DCAF11/LEC14B; IPR019775:WD40 repeat, conserved site;	95.95	1	3	7	8		4.92164	2.77394		19.684		49.22	9.66	0	69.47		2	1		4	321	34.8422	6.44287
CL3794Contig1:187:1221:1:+	len=345 acc=CL3794Contig1:187:1221:1:+ interpro_family=IPR007726 interpro_raw=IPR007726 id=CL3794Contig1:187:1221:1:+ def=IPR007726:SS18 family;	95.93	1	11	65	87	22.1382	89.1776	94.8698	90.8063	22.0896	27.33	82.56	63.66	62.21	34.59	8	26	22	16	6	344	37.0704	8.17725
	>sp|LYSC_LYSEN|	95.91	1	1	13	16	15.9924	8.90243	12.443	25.9992	10.1945	77.32	30.11	54.65	66.17	42.01	3	2	3	4	2	269	27.9432	6.7124
c104247_g2_i4:1:734:3:+	len=244 acc=c104247_g2_i4:1:734:3:+ go=GO:0003676,GO:0003723 interpro_raw=IPR004087,IPR004088,IPR015096 interpro_domain=IPR015096,IPR004087 id=c104247_g2_i4:1:734:3:+ def=IPR004087:K Homology domain;	95.88	1	7	36	106	150.884	13.2311	146.629	437.01	25.3445	69.55	55.97	43.21	84.77	37.86	9	5	11	24	6	243	26.3433	6.56592
CL1093Contig1:722:1228:2:+	len=169	95.86	1	1	23	25	31.2178	27.7971	9.66367	15.2499	71.3361	72.19	62.13	57.99	52.66	84.62	5	4	2	3	10	169	16.9831	12.3521
c104914_g2_i3:245:533:2:+	len=96	95.83	1	1	16	20	45.3708	33.3226	28.3478	16.3501	5.1469	81.25	77.08	92.71	88.54	65.63	6	6	3	2	1	96	10.4173	7.84033
c97750_g1_i5:1:292:2:+	len=97 acc=c97750_g1_i5:1:292:2:+ interpro_domain=IPR001763 id=c97750_g1_i5:1:292:2:+ interpro_raw=IPR001763 def=IPR001763:Rhodanese-like domain;	95.83	2	2	5	6		6.97545	11.0732	9.26136			50	54.17	95.83			1	2	2		96	10.469	7.88428
c98994_g1_i1:2336:3199:2:+	len=288 acc=c98994_g1_i1:2336:3199:2:+ id=c98994_g1_i1:2336:3199:2:+ interpro_domain=IPR023395 = interpro_raw=IPR018108,IPR023395 def=IPR023395:Mitochondrial carrier domain;	95.82	1	2	25	30	54.019	22.018	18.9207	14.7748	39.4002	75.26	25.78	40.07	35.89	87.46	11	3	4	2	6	287	31.592	9.74463
c100819_g2_i2:290:721:2:+	len=144	95.8	1	2	18	24	90.4337	13.324		11.999	55.0586	95.8	59.44	0	49.65	60.14	11	2		1	6	143	15.2338	9.12939
c94870_g3_i1:1:361:3:+	len=119	95.8	1	74	99	106	145	130.896	103.69	73.2195	61.2668	73.95	73.11	64.71	61.34	88.24	28	25	22	16	13	119	11.0184	8.83643
c104126_g2_i1:1:642:1:+	len=214	95.79	1	40	43	54	48.7067	67.3181	21.3881	17.8945	20.3851	88.79	88.79	70.09	73.83	47.2	12	17	7	7	4	214	25.4486	9.02686
c104921_g3_i1:5:431:2:+	len=142 acc=c104921_g3_i1:5:431:2:+ id=c104921_g3_i1:5:431:2:+ ec=1.2.1.- interpro_raw=IPR020830,IPR020831,IPR020829 go=GO:0055114,GO:0016620 interpro_family=IPR020831 pathways= def=IPR020831:Glyceraldehyde/Erythrose phosphate dehydrogenase family;	95.77	1	1	13	14	10.3963	4.23245	4.17062	14.8488	25.6962	80.99	69.72	11.97	71.13	83.8	2	2	1	4	5	142	14.6836	8.63135
CL3459Contig1:1:359:3:+	len=119	95.76	1	14	30	63	36.5748	50.3078	100.857	270.417	55.7374	83.05	80.51	93.22	88.14	90.68	3	3	13	17	4	118	12.1136	6.50732
CL9555Contig1:285:1199:3:+	len=305 acc=CL9555Contig1:285:1199:3:+ id=CL9555Contig1:285:1199:3:+ interpro_domain=IPR023395 = interpro_raw=IPR023395,IPR018108 def=IPR023395:Mitochondrial carrier domain;	95.72	1	1	17	18	7.05251	11.4263	10.5471	10.0593	20.7496	28.62	57.24	25.66	36.84	52.96	2	4	4	4	4	304	33.5042	8.93896
c100110_g1_i1:64:1116:1:+	len=351 acc=c100110_g1_i1:64:1116:1:+ interpro_raw=IPR018108,IPR023395 = interpro_domain=IPR023395 id=c100110_g1_i1:64:1116:1:+ def=IPR023395:Mitochondrial carrier domain;	95.71	2	1	38	48	30.9978	64.163	66.3283	52.6978	69.2281	56.29	80.86	68	67.14	78	7	11	10	7	8	350	38.6841	9.62744
c92862_g1_i1:30:380:3:+	len=117	95.69	1	55	78	100	121.937	116.955	77.0201	82.9453	97.6551	71.55	81.03	68.1	92.24	89.66	22	21	13	14	19	116	11.4945	4.1958
c93470_g1_i1:36:662:3:+	len=209 acc=c93470_g1_i1:36:662:3:+ ec=5.2.1.8 interpro_domain=IPR002130,IPR029000 id=c93470_g1_i1:36:662:3:+ interpro_family=IPR024936 go=GO:0000413,GO:0006457,GO:0003755 interpro_raw=IPR024936,IPR002130,IPR029000 def=IPR002130:Cyclophilin-type peptidyl-prolyl cis-trans isomerase domain; IPR024936:Cyclophilin-type peptidyl-prolyl cis-trans isomerase; IPR029000:Cyclophilin-like domain;	95.67	1	1	12	12	4.49294	11.4026	18.1037	6.20156		32.21	81.73	43.27	27.88		1	5	4	2		208	22.3009	6.66846
c83576_g2_i1:1:205:1:+	len=68 acc=c83576_g2_i1:1:205:1:+ interpro_family=IPR015700 go=GO:0006351,GO:0008270,GO:0005634,GO:0003899,GO:0032549 interpro_raw=IPR015700 pathways=KEGG:ec00230+2.7.7.6,KEGG:ec00240+2.7.7.6 ec=2.7.7.6 id=c83576_g2_i1:1:205:1:+ def=IPR015700:DNA-directed RNA polymerase III subunit RPC1;	95.59	1	1	4	5		6.0173	17.1865		2.72283	0	36.76	88.24		25		1	2		1	68	7.38686	8.67529
c100809_g1_i2:185:865:2:+	len=227 acc=c100809_g1_i2:185:865:2:+ interpro_domain=IPR020846 id=c100809_g1_i2:185:865:2:+ interpro_family=IPR011701 go=GO:0055085,GO:0016021 interpro_raw=IPR011701,IPR020846 def=IPR011701:Major facilitator superfamily; IPR020846:Major facilitator superfamily domain;	95.58	2	2	39	52	63.109	67.6184	42.3166	40.2248	43.0325	84.96	91.15	65.49	66.37	51.33	8	14	8	6	6	226	23.8944	8.73389
c94472_g1_i1:259:804:1:+	len=182 acc=c94472_g1_i1:259:804:1:+ interpro_family=IPR007274 go=GO:0016021,GO:0035434,GO:0005375 interpro_raw=IPR007274 id=c94472_g1_i1:259:804:1:+ def=IPR007274:Ctr copper transporter;	95.58	2	1	10	15	3.96237	17.3925	28.8154	3.35367	11.3211	23.76	86.19	39.78	16.57	46.96	1	4	4	1	2	181	20.3909	6.49365
c98694_g2_i2:1:680:3:+	len=226	95.58	1	36	42	58	104.818	26.3406	19.8755	22.4917	110.784	94.25	53.54	71.24	59.73	95.58	14	7	7	9	13	226	21.5877	5.30029
c99598_g1_i3:1:612:1:+	len=204	95.57	1	2	14	17	5.41273	24.3884	23.7231	6.72936	6.69676	15.76	77.83	61.08	39.41	60.59	2	3	5	2	2	203	22.0209	6.80029
c84212_g1_i1:1:270:1:+	len=90 acc=c84212_g1_i1:1:270:1:+ interpro_raw=IPR017945,IPR006070 go=GO:0003725 id=c84212_g1_i1:1:270:1:+ interpro_domain=IPR017945 def=IPR017945:DHBP synthase RibB-like alpha/beta domain;	95.56	1	2	4	5	8.81418	2.40524	7.24936	10.1881		33.33	23.33	55.56	84.44		1	1	1	1		90	10.2353	9.90576
c95554_g2_i1:1:409:2:+	len=136 acc=c95554_g2_i1:1:409:2:+ id=c95554_g2_i1:1:409:2:+ interpro_domain=IPR027417 interpro_raw=IPR003578,IPR027417,IPR020849,IPR003579,IPR001806 go=GO:0016020,GO:0005525,GO:0015031,GO:0007165,GO:0007264,GO:0005622 interpro_family=IPR001806 pathways= def=IPR001806:Small GTPase superfamily; IPR027417:P-loop containing nucleoside triphosphate hydrolase;	95.56	1	1	3	3		9.95477	1.69305				90.37	8.89				2	1			135	15.0962	4.53857
CL3668Contig1:1186:3669:1:+	len=828	95.53	1	84	117	141	79.7305	134.404	113.343	293.063	117.397	67.35	66.75	55.74	66.26	49.94	18	29	25	34	23	827	85.8969	9.65674
c101490_g1_i3:374:1435:2:+	len=354 acc=c101490_g1_i3:374:1435:2:+ interpro_raw=IPR011527 go=GO:0005524,GO:0006810,GO:0042626,GO:0016021,GO:0055085 interpro_domain=IPR011527 id=c101490_g1_i3:374:1435:2:+ def=IPR011527:ABC transporter type 1, transmembrane domain;	95.47	2	1	60	82	114.59	112.125	85.2628	70.7296	140.091	68.56	65.16	57.79	52.97	66.86	15	17	12	10	15	353	38.3162	9.48096
c102011_g2_i1:1:266:3:+	len=88 acc=c102011_g2_i1:1:266:3:+ interpro_family=IPR010562 interpro_raw=IPR010562 id=c102011_g2_i1:1:266:3:+ def=IPR010562:Haemolymph juvenile hormone binding;	95.45	1	2	6	6	11.6439		7.21959		1.27415	87.5		81.82		13.64	3		2		1	88	9.95709	6.55127
c105314_g1_i2:189:1313:3:+	len=375 acc=c105314_g1_i2:189:1313:3:+ id=c105314_g1_i2:189:1313:3:+ interpro_raw=IPR002657 interpro_family=IPR002657 go=GO:0016020 def=IPR002657:Bile acid:sodium symporter/arsenical resistance protein Acr3;	95.45	4	1	28	40	32.1034	40.6433	18.4678	22.8322	23.2074	49.73	45.45	31.55	54.28	43.05	5	10	6	6	5	374	41.2752	8.93896
c103835_g1_i1:1:329:1:+	len=109 acc=c103835_g1_i1:1:329:1:+ interpro_raw=IPR007110,IPR003599,IPR013783,IPR013098,IPR003598 go=GO:0005515 id=c103835_g1_i1:1:329:1:+ interpro_domain=IPR007110,IPR013783 def=IPR007110:Immunoglobulin-like domain; IPR013783:Immunoglobulin-like fold;	95.41	1	1	12	14	24.2181	17.0107		4.58837	40.0056	82.57	60.55	0	44.04	95.41	3	3		1	6	109	12.0141	7.13721
c90262_g1_i1:1:982:2:+	len=327 acc=c90262_g1_i1:1:982:2:+ id=c90262_g1_i1:1:982:2:+ interpro_domain=IPR024605 ec=1.6.1.2 pathways=KEGG:ec00760+1.6.1.2 interpro_raw=IPR012136,IPR024605 go=GO:0055114,GO:0016021,GO:0008750,GO:0050661 interpro_family=IPR012136 def=IPR012136:NADP transhydrogenase, beta subunit; IPR024605:NAD(P) transhydrogenase, alpha subunit, C-terminal;	95.41	1	85	253	352	494.131	583.932	305.673	357.718	677.518	85.02	95.11	71.25	87.16	89.6	63	64	39	41	79	327	33.3446	7.81104
c66757_g4_i1:1:262:2:+	len=87 acc=c66757_g4_i1:1:262:2:+ id=c66757_g4_i1:1:262:2:+ interpro_domain=IPR029058 ec=3.1.1.1 interpro_raw=IPR029058,IPR000734,IPR013818 go=GO:0052689 interpro_family=IPR000734 def=IPR000734:Triacylglycerol lipase family; IPR029058:Alpha/Beta hydrolase fold;	95.4	1	1	17	24	22.0137	21.6243	51.2717	9.54365	61.2231	83.91	83.91	83.91	87.36	94.25	5	3	2	2	8	87	9.2099	6.34131
c775_g1_i1:1:589:2:+	len=196	95.38	1	2	18	18	16.9163	27.2606	18.77	17.4804	12.4763	30.77	60.51	51.28	55.38	45.64	4	6	3	3	2	195	21.2578	10.1108
c101355_g1_i8:413:739:2:+	len=109 acc=c101355_g1_i8:413:739:2:+ id=c101355_g1_i8:413:739:2:+ interpro_raw=IPR000618 interpro_family=IPR000618 go=GO:0042302 def=IPR000618:Insect cuticle protein;	95.37	2	1	15	18	39.959	37.8874	26.0277	25.6713		82.41	90.74	82.41	95.37	0	5	5	4	2		108	11.5237	4.36084
c102340_g3_i4:141:1426:3:+	len=428 acc=c102340_g3_i4:141:1426:3:+ go=GO:0016021,GO:0055085 interpro_family=IPR011701 interpro_raw=IPR020846,IPR011701 id=c102340_g3_i4:141:1426:3:+ interpro_domain=IPR020846 def=IPR011701:Major facilitator superfamily; IPR020846:Major facilitator superfamily domain;	95.33	2	3	19	27	12.4546	23.0834	28.5314	32.9744	55.5824	36.68	53.27	33.64	42.99	68.22	4	5	4	4	7	428	47.0557	8.63135
c98500_g1_i1:1:1797:1:+	len=599	95.32	2	88	113	156	168.564	132.964	183.739	123.979	237.851	50.33	59.36	58.03	56.86	55.69	28	21	31	21	30	598	64.5131	8.57275
c104613_g1_i1:42:677:3:+	len=212 acc=c104613_g1_i1:42:677:3:+ id=c104613_g1_i1:42:677:3:+ go=GO:0042302 interpro_family=IPR000618 interpro_raw=IPR000618 def=IPR000618:Insect cuticle protein;	95.26	1	14	20	21	4.17582	32.2319	20.4073	9.12476	43.5021	23.22	75.83	31.28	32.23	56.4	1	6	4	2	8	211	22.2568	6.16357
CL7815Contig1:1:815:3:+	len=271 acc=CL7815Contig1:1:815:3:+ go=GO:0016491,GO:0008152 interpro_family=IPR002347 interpro_raw=IPR002198,IPR016040,IPR013968,IPR020904,IPR002347 ec=1.-.-.- id=CL7815Contig1:1:815:3:+ def=IPR002347:Glucose/ribitol dehydrogenase;	95.19	1	1	17	22	25.0822	15.1885	18.8357	6.65705	25.2667	55.19	55.19	30.37	16.3	72.96	5	3	5	1	5	270	29.0099	8.99756
c87071_g2_i2:198:385:3:+	len=62	95.16	1	1	10	21	29.041	31.0614	14.002	17.9179	29.0115	93.55	93.55	93.55	95.16	88.71	5	5	2	3	3	62	6.13689	4.729
c94531_g1_i1:135:569:3:+	len=145	95.14	1	2	3	4	4.86972		6.8541			95.14	0	42.36			3		1			144	15.6764	4.37354
c98312_g2_i1:189:620:3:+	len=144	95.1	1	2	11	12	15.6561	15.5756	23.8809		20.071	62.94	60.14	70.63	0	60.14	2	2	5		2	143	14.7801	10.272
c101006_g5_i2:81:572:3:+	len=164 acc=c101006_g5_i2:81:572:3:+ interpro_raw=IPR016035 go=GO:0008152 interpro_domain=IPR016035 id=c101006_g5_i2:81:572:3:+ def=IPR016035:Acyl transferase/acyl hydrolase/lysophospholipase;	95.09	2	1	8	11	10.5943	6.86108	27.3213	10.6007	4.38539	68.71	28.83	50.31	49.08	26.38	2	1	2	2	1	163	18.7317	7.28369
c95410_g2_i1:1:486:1:+	len=162 acc=c95410_g2_i1:1:486:1:+ id=c95410_g2_i1:1:486:1:+ interpro_raw=IPR002293 go=GO:0003333,GO:0015171,GO:0016020 interpro_family=IPR002293 def=IPR002293:Amino acid/polyamine transporter I;	95.06	1	3	27	33	56.2622	17.7513	33.6044	6.10074	37.1582	86.42	30.25	78.4	21.6	78.4	10	3	7	2	7	162	17.9447	8.48486
c104283_g1_i6:1:1458:1:+	len=486 acc=c104283_g1_i6:1:1458:1:+ id=c104283_g1_i6:1:1458:1:+ = interpro_raw=IPR008160 def=IPR008160:Collagen triple helix repeat;	95.05	2	2	252	351	313.42	504.279	280.644	212.821	341.142	88.25	93.81	88.25	81.65	88.04	55	87	54	44	46	485	47.4237	8.96826
c88474_g1_i1:83:691:2:+	len=203 acc=c88474_g1_i1:83:691:2:+ interpro_raw=IPR020849,IPR027417,IPR001806 go=GO:0005525,GO:0007165,GO:0016020,GO:0007264 interpro_family=IPR001806 id=c88474_g1_i1:83:691:2:+ interpro_domain=IPR027417 def=IPR001806:Small GTPase superfamily; IPR027417:P-loop containing nucleoside triphosphate hydrolase;	95.05	1	2	7	7	11.8414	13.11	7.374	4.55828		37.13	62.38	17.82	22.28		2	2	2	1		202	22.6287	8.98291
c30766_g1_i1:1:963:1:+	len=321 acc=c30766_g1_i1:1:963:1:+ id=c30766_g1_i1:1:963:1:+ interpro_domain=IPR020846 go=GO:0055085,GO:0016021 interpro_family=IPR011701 interpro_raw=IPR011701,IPR020846 def=IPR011701:Major facilitator superfamily; IPR020846:Major facilitator superfamily domain;	95.02	2	4	30	45	8.41469	70.187	22.2782	24.4617	55.7957	44.24	63.24	38.94	43.93	82.87	3	10	6	5	9	321	35.3985	8.1333
CL1408Contig1:2699:2881:1:-	len=61	95	1	1	3	3	2.80838	3.70942		2.46181		23.33	70		40		1	1		1		60	6.68554	10.9604
c60302_g1_i1:1:422:3:+	len=140 acc=c60302_g1_i1:1:422:3:+ id=c60302_g1_i1:1:422:3:+ interpro_raw=IPR005502 interpro_family=IPR005502 def=IPR005502:ADP-ribosylation/Crystallin J1;	95	1	2	9	11	4.53099	13.5361	8.8063	6.00518	32.052	28.57	65.71	46.43	30	86.43	1	2	2	1	3	140	14.6393	4.91943
c98381_g1_i1:678:860:3:+	len=61	95	1	1	7	7	3.80928	23.2652	5.09917		4.64066	68.33	91.67	46.67	0	71.67	1	4	1		1	60	6.46324	10.7847
c112264_g1_i1:1:185:3:+	len=61 acc=c112264_g1_i1:1:185:3:+ interpro_raw=IPR014722,IPR003256,IPR008991 go=GO:0005622,GO:0003735,GO:0005840,GO:0006412 interpro_family=IPR003256 id=c112264_g1_i1:1:185:3:+ def=IPR003256:Ribosomal protein L24;	95	1	1	4	4			9.71479	6.33045	3.12156			93.33	66.67	68.33			2	1	1	60	6.53155	9.40771
c84713_g2_i1:1:419:1:+	len=139 acc=c84713_g2_i1:1:419:1:+ interpro_raw=IPR000276,IPR017452 go=GO:0007186,GO:0016021,GO:0004930 interpro_family=IPR000276 pathways= id=c84713_g2_i1:1:419:1:+ interpro_domain=IPR017452 def=IPR000276:G protein-coupled receptor, rhodopsin-like; IPR017452:GPCR, rhodopsin-like, 7TM;	94.96	1	1	10	11	18.1802	3.05989	18.3129	5.15007	6.1042	68.35	51.08	82.01	29.5	30.22	3	2	2	1	2	139	15.9705	9.51025
CL6984Contig1:1:477:2:+	len=158 acc=CL6984Contig1:1:477:2:+ id=CL6984Contig1:1:477:2:+ interpro_family=IPR020636 go=GO:0004672,GO:0005524,GO:0006468 interpro_raw=IPR017441,IPR000719,IPR011009,IPR002290 def=IPR017441:Protein kinase, ATP binding site; IPR020636:Calcium/calmodulin-dependent/calcium-dependent protein kinase;	94.94	1	1	13	17	13.3912	31.016	9.09595	4.93316	21.2365	42.41	74.05	29.11	16.46	72.78	1	6	1	1	5	158	18.4834	8.95361
CL9949Contig1:430:1494:2:-	len=355 acc=CL9949Contig1:430:1494:2:- interpro_domain=IPR027363 id=CL9949Contig1:430:1494:2:- pathways=KEGG:ec00270+5.3.1.23,MetaCyc:PWY-7174,MetaCyc:PWY-4361,UniPathway:UPA00904 interpro_raw=IPR005251,IPR000649,IPR027363,IPR011559 interpro_family=IPR000649 go=GO:0044249,GO:0044237 def=IPR000649:Initiation factor 2B-related; IPR027363:Methylthioribose-1-phosphate isomerase-like, N-terminal domai…	94.92	1	17	48	61	84.4004	78.0741	52.7109	46.8588	101.443	64.41	79.94	57.63	65.25	41.81	13	14	9	7	13	354	38.8391	6.53662
c87450_g1_i5:61:474:1:+	len=138 acc=c87450_g1_i5:61:474:1:+ interpro_domain=IPR000463 id=c87450_g1_i5:61:474:1:+ interpro_raw=IPR000566,IPR011038,IPR000463,IPR012674 interpro_family=IPR002968 go=GO:0008289,GO:0006810,GO:0005215 def=IPR000463:Cytosolic fatty-acid binding; IPR002968:Alpha-1-microglobulin;	94.89	1	23	24	49	19.6148	67.52	58.2142	53.7042	4.81562	79.56	91.97	81.02	83.21	20.44	6	10	12	9	1	137	15.1598	6.18896
c93658_g1_i1:1:413:3:+	len=137 acc=c93658_g1_i1:1:413:3:+ interpro_domain=IPR000477 id=c93658_g1_i1:1:413:3:+ interpro_raw=IPR000477 def=IPR000477:Reverse transcriptase domain;	94.89	1	4	6	10		17.8735	36.5727	3.28966	9.64196	0	85.4	37.96	59.85	47.45		3	1	2	1	137	15.2492	9.67139
c91527_g1_i1:1:941:3:+	len=313 acc=c91527_g1_i1:1:941:3:+ interpro_raw=IPR003961,IPR013783 go=GO:0005515 interpro_domain=IPR013783 id=c91527_g1_i1:1:941:3:+ def=IPR013783:Immunoglobulin-like fold;	94.87	1	3	28	32	29.8532	32.7074	26.3816	16.7092	58.928	71.15	35.9	25.32	31.09	76.28	5	9	6	3	8	312	34.0058	9.81787
c38512_g1_i1:17:309:2:+	len=97 acc=c38512_g1_i1:17:309:2:+ interpro_domain=IPR027413 id=c38512_g1_i1:17:309:2:+ pathways= interpro_raw=IPR002423,IPR027413,IPR002194,IPR017998 interpro_family=IPR002423 go=GO:0006457,GO:0005524,GO:0051082 def=IPR002423:Chaperonin Cpn60/TCP-1 family; IPR027413:GroEL-like equatorial domain;	94.85	1	2	34	54	52.0072	57.2128	98.5466	26.078	60.7863	75.26	88.66	89.69	84.54	85.57	7	10	10	4	10	97	10.1262	6.55127
c104247_g2_i5:170:628:2:+	len=153 acc=c104247_g2_i5:170:628:2:+ interpro_raw=IPR015096 id=c104247_g2_i5:170:628:2:+ interpro_domain=IPR015096 def=IPR015096:Domain of unknown function DUF1897;	94.74	1	7	51	137	142.365	9.24279	221.999	555.196	39.6672	86.18	55.92	88.82	88.82	86.18	8	3	22	32	10	152	16.0262	4.32275
c24143_g1_i1:1:401:3:+	len=133 acc=c24143_g1_i1:1:401:3:+ interpro_raw=IPR000719,IPR017441,IPR011009 go=GO:0004672,GO:0005524,GO:0006468 interpro_domain=IPR011009 id=c24143_g1_i1:1:401:3:+ def=IPR011009:Protein kinase-like domain;	94.74	1	1	13	16	15.6129	10.6219	11.896	17.8773	7.97863	54.89	62.41	57.14	71.43	36.84	4	4	3	3	2	133	14.5453	8.93896
c43717_g1_i1:1:679:2:+	len=226 acc=c43717_g1_i1:1:679:2:+ pathways= interpro_raw=IPR004837 go=GO:0055085,GO:0016021 interpro_domain=IPR004837 id=c43717_g1_i1:1:679:2:+ def=IPR004837:Sodium/calcium exchanger membrane region;	94.69	1	2	10	11	12.188	17.2437	25.0026	4.55547		47.79	39.38	80.97	15.04		3	3	4	1		226	25.5873	7.54736
CL812Contig1:169:789:1:+	len=207 acc=CL812Contig1:169:789:1:+ interpro_domain=IPR013024 id=CL812Contig1:169:789:1:+ interpro_family=IPR006840 interpro_raw=IPR006840,IPR013024 def=IPR006840:ChaC-like protein; IPR013024:Butirosin biosynthesis, BtrG-like;	94.66	2	4	11	12	14.8276	24.4656	7.11935	14.227	14.2209	31.55	41.75	44.17	53.4	49.51	3	3	2	2	2	206	23.3708	7.57666
c103255_g1_i2:77:1708:2:+	len=544 acc=c103255_g1_i2:77:1708:2:+ ec=2.7.1.- id=c103255_g1_i2:77:1708:2:+ go=GO:0005975,GO:0016773 interpro_family=IPR000577 interpro_raw=IPR018485,IPR018484,IPR006003,IPR000577 pathways=MetaCyc:PWY-4261,KEGG:ec00561+2.7.1.30,UniPathway:UPA00618 def=IPR000577:Carbohydrate kinase, FGGY;	94.66	1	2	40	42	39.9361	16.0193	61.7802	24.8982	67.4681	44.2	30.39	44.94	43.65	55.8	8	4	10	8	12	543	58.6048	6.52197
c71415_g1_i1:1:173:3:+	len=57	94.64	1	16	28	39	30.5968	31.1633	23.6602	33.0747	23.9747	91.07	92.86	91.07	92.86	78.57	7	7	8	6	5	56	4.78044	4.50049
c101934_g1_i1:129:298:3:+	len=56 acc=c101934_g1_i1:129:298:3:+ id=c101934_g1_i1:129:298:3:+ interpro_raw=IPR004327 interpro_family=IPR004327 go=GO:0019211 def=IPR004327:Phosphotyrosyl phosphatase activator, PTPA;	94.64	1	1	4	4		12.9814	1.41458				91.07	21.43		0		3	1			56	6.09503	8.88037
c92168_g1_i1:112:282:1:+	len=57	94.64	1	1	1	1			3.96484					94.64					1			56	6.25103	4.71631
c106398_g2_i1:1:281:1:+	len=93 acc=c106398_g2_i1:1:281:1:+ interpro_raw=IPR001101 = go=GO:0005856 id=c106398_g2_i1:1:281:1:+ def=IPR001101:Plectin repeat;	94.62	1	5	6	8			18.6945	10.2213			0	94.62	64.52	0			5	2		93	10.2985	5.40186
c99413_g3_i1:1:661:2:+	len=220	94.55	1	1	27	32	45.8333	33.278	18.4444	4.19412	32.281	86.82	55.91	44.09	40	86.36	8	6	5	2	7	220	23.1355	4.55127
c105886_g3_i1:712:2793:1:+	len=694 acc=c105886_g3_i1:712:2793:1:+ interpro_raw=IPR017868,IPR014756,IPR001298,IPR013783 go=GO:0005515 interpro_domain=IPR014756,IPR013783 id=c105886_g3_i1:712:2793:1:+ def=IPR013783:Immunoglobulin-like fold; IPR014756:Immunoglobulin E-set;	94.52	1	35	52	78	93.6105	89.6516	46.8212	65.1658	72.4366	71.14	68.4	25.54	52.96	52.81	16	15	10	12	13	693	74.1065	6.94678
c80527_g1_i1:1:329:2:+	len=109	94.5	1	38	51	69	27.9598	72.345	77.6596	26.2609	16.2715	39.45	88.99	59.63	84.4	46.79	10	17	21	8	5	109	11.1814	4.32275
c96301_g2_i1:1:331:2:+	len=110	94.5	1	16	21	81	65.663	51.0955	25.143	16.8581	58.5883	55.96	94.5	56.88	45.87	59.63	5	9	5	3	6	109	11.5596	4.14502
c106000_g1_i7:1:386:3:+	len=128 acc=c106000_g1_i7:1:386:3:+ interpro_domain=IPR009110 id=c106000_g1_i7:1:386:3:+ ec=2.3.1.48 interpro_raw=IPR009110,IPR014744 go=GO:0005634,GO:0004402,GO:0016573,GO:0006355,GO:0003713,GO:0000123 pathways= def=IPR009110:Nuclear receptor coactivator, interlocking;	94.49	1	1	21	29	23.9509	32.8628	19.3665	10.721	22.8059	31.5	51.97	70.08	44.88	73.23	5	8	5	3	4	127	13.1227	7.25439
c112459_g1_i1:1:220:3:+	len=72	94.44	1	1	3	4	9.04782			3.07457	6.80801	38.89			25	79.17	1			1	1	72	8.27247	10.3599
c25472_g1_i1:1:217:1:+	len=72 acc=c25472_g1_i1:1:217:1:+ ec=2.7.7.6 interpro_domain=IPR007083 id=c25472_g1_i1:1:217:1:+ pathways=KEGG:ec00230+2.7.7.6,KEGG:ec00240+2.7.7.6 go=GO:0003899,GO:0006351,GO:0003677 interpro_raw=IPR007083 def=IPR007083:RNA polymerase Rpb1, domain 4;	94.44	1	1	11	13	21.0528	5.90635	7.42158	15.1759		90.28	90.28	81.94	80.56		5	3	1	3		72	7.87603	9.72998
c104537_g3_i4:58:273:1:+	len=72 acc=c104537_g3_i4:58:273:1:+ interpro_family=IPR008081 interpro_raw=IPR008081 id=c104537_g3_i4:58:273:1:+ def=IPR008081:Cytoplasmic FMR1-interacting;	94.44	1	1	1	1		9.16196					94.44					1				72	8.07504	8.90967
c99287_g1_i4:1:268:1:+	len=89 acc=c99287_g1_i4:1:268:1:+ id=c99287_g1_i4:1:268:1:+ go=GO:0016021,GO:0006810,GO:0005215 interpro_family=IPR026082 interpro_raw=IPR026082 def=IPR026082:ABC transporter A, ABCA;	94.38	2	1	3	3	3.14969				7.21597	39.33		0	0	94.38	1				2	89	10.3755	8.38232
c100242_g1_i1:291:665:3:+	len=125 acc=c100242_g1_i1:291:665:3:+ interpro_raw=IPR000620 go=GO:0016020,GO:0016021 interpro_domain=IPR000620 id=c100242_g1_i1:291:665:3:+ def=IPR000620:EamA domain;	94.35	2	1	9	14	15.4517	12.1628	12.9195		6.59694	81.45	33.06	74.19		30.65	4	3	2		1	124	13.2918	7.03467
c100769_g6_i1:153:575:3:+	len=141 acc=c100769_g6_i1:153:575:3:+ interpro_family=IPR000973 go=GO:0005515 interpro_raw=IPR007110,IPR013783,IPR013098,IPR003599 interpro_domain=IPR013098 id=c100769_g6_i1:153:575:3:+ def=IPR000973:T-cell surface antigen CD4; IPR013098:Immunoglobulin I-set;	94.33	1	1	6	6	7.5414	13.7013			3.50564	21.28	91.49			17.73	2	3			1	141	15.2838	8.79248
c100163_g2_i6:1:373:2:+	len=124	94.31	1	2	31	45	42.6855	36.3705	16.9858	31.4865	73.5718	65.04	76.42	47.15	86.18	79.67	9	8	3	4	12	123	12.4799	9.45166
c90749_g1_i1:76:447:1:+	len=124 acc=c90749_g1_i1:76:447:1:+ id=c90749_g1_i1:76:447:1:+ interpro_raw=IPR001854,IPR018254 interpro_family=IPR001854 go=GO:0006412,GO:0003735,GO:0005840,GO:0005622 def=IPR001854:Ribosomal protein L29;	94.31	1	10	10	16			57.1156	12.6735		0	0	73.17	36.59	0			7	3		123	14.5355	10.8286
c99681_g1_i1:311:1207:2:+	len=299 acc=c99681_g1_i1:311:1207:2:+ = interpro_raw=IPR018108,IPR023395 id=c99681_g1_i1:311:1207:2:+ interpro_domain=IPR023395 def=IPR023395:Mitochondrial carrier domain;	94.3	1	2	25	36	24.3326	34.1587	17.6822	23.145	68.5671	56.04	52.01	39.26	33.56	80.87	7	7	4	2	8	298	31.7885	9.05615
c99755_g6_i1:1770:1981:3:+	len=70	94.29	1	9	12	16	25.0445	23.753	17.0852	15.2404		92.86	91.43	91.43	84.29	0	5	3	3	3		70	7.02851	5.80811
c104020_g1_i2:3351:3665:3:+	len=105	94.23	1	1	15	16	40.6132		19.2359	4.09552	13.9353	94.23	0	93.27	37.5	72.12	7		5	1	3	104	10.8243	9.24658
c104807_g1_i2:291:1382:3:+	len=364 acc=c104807_g1_i2:291:1382:3:+ interpro_raw=IPR003767 go=GO:0016491,GO:0055114,GO:0008152 interpro_family=IPR003767 id=c104807_g1_i2:291:1382:3:+ ec=1.-.-.- def=IPR003767:Malate/L-lactate dehydrogenase;	94.21	3	7	60	66	65.352	78.8946	83.8638	51.3399	70.281	72.45	74.93	73	54.27	84.3	12	15	14	8	14	363	38.5453	6.60986
c98927_g1_i1:605:1786:2:+	len=394 acc=c98927_g1_i1:605:1786:2:+ interpro_family=IPR019176 interpro_raw=IPR019176 id=c98927_g1_i1:605:1786:2:+ def=IPR019176:Cytochrome B561-related;	94.15	1	2	19	20	5.02991	14.1885	15.6065	16.3086	44.8972	39.19	26.72	21.12	32.32	41.98	3	4	3	3	6	393	44.7227	8.74854
c94833_g2_i1:1:717:2:+	len=238 acc=c94833_g2_i1:1:717:2:+ go=GO:0008152,GO:0003824 interpro_raw=IPR000873 id=c94833_g2_i1:1:717:2:+ interpro_domain=IPR000873 def=IPR000873:AMP-dependent synthetase/ligase;	94.12	1	1	7	9	5.88959	9.07464	13.0369	18.4492		18.91	26.47	25.21	88.66	0	1	2	2	3		238	26.2753	5.42725
c104119_g1_i3:1:458:1:+	len=152 acc=c104119_g1_i3:1:458:1:+ interpro_domain=IPR008979 id=c104119_g1_i3:1:458:1:+ ec=3.2.1.- interpro_raw=IPR006104,IPR008979 go=GO:0005975,GO:0004553 def=IPR008979:Galactose-binding domain-like;	94.08	1	1	10	11	5.88968	8.85199	13.1811	15.8529	9.01632	53.29	55.26	62.5	50	21.05	1	1	3	4	2	152	17.2186	5.79541
CL6698Contig1:1013:1318:2:+	len=102	94.06	1	1	10	10	9.0914	26.6795	7.30769		6.78463	48.51	93.07	61.39	0	54.46	1	7	1		1	101	10.2667	4.53857
c73566_g1_i1:1:203:2:+	len=67 acc=c73566_g1_i1:1:203:2:+ interpro_raw=IPR020846 id=c73566_g1_i1:1:203:2:+ interpro_domain=IPR020846 def=IPR020846:Major facilitator superfamily domain;	94.03	1	3	7	15	25.3216	27.0263	15.205		8.34055	70.15	94.03	94.03		73.13	2	1	3		2	67	7.63911	9.24658
c94424_g1_i1:31:585:1:+	len=185 acc=c94424_g1_i1:31:585:1:+ id=c94424_g1_i1:31:585:1:+ interpro_raw=IPR000133 interpro_family=IPR000133 go=GO:0006621,GO:0016021,GO:0046923 def=IPR000133:ER lumen protein retaining receptor;	94.02	1	1	4	5		9.54221	8.01033	6.90169			39.67	42.93	41.3			1	2	1		184	21.7352	8.03076
c88129_g2_i1:1:303:3:+	len=100 acc=c88129_g2_i1:1:303:3:+ interpro_domain=IPR000432,IPR027417 id=c88129_g2_i1:1:303:3:+ go=GO:0005524,GO:0006298,GO:0030983 interpro_raw=IPR027417,IPR000432 def=IPR000432:DNA mismatch repair protein MutS, C-terminal; IPR027417:P-loop containing nucleoside triphosphate hydrolase;	94	1	2	5	7	16.6873		7.80694		4.36826	86	0	49	0	54	3		1		1	100	10.9249	7.41553
c98173_g1_i1:1:154:2:+	len=51	94	1	2	6	6		5.48008	4.61699	10.4082	1.90728		70	62	84	42		1	1	3	1	50	5.11063	9.18799
c47893_g1_i1:1:250:1:+	len=83	93.98	1	1	11	14	13.2727	3.844	24.6506	10.2134	9.71185	92.77	46.99	57.83	81.93	62.65	4	1	4	2	1	83	8.89222	4.97021
c88332_g7_i1:1:398:1:+	len=132 acc=c88332_g7_i1:1:398:1:+ id=c88332_g7_i1:1:398:1:+ interpro_domain=IPR000904,IPR023394 interpro_raw=IPR023394,IPR000904 go=GO:0032012,GO:0005086 def=IPR000904:Sec7 domain; IPR023394:Sec7 domain, alpha orthogonal bundle;	93.94	1	1	8	14	27.4108		10.3344		32.5488	84.85	0	63.64	0	75.76	4		1		5	132	14.3003	4.75439
c99592_g1_i6:1:547:2:+	len=182 acc=c99592_g1_i6:1:547:2:+ go=GO:0016790,GO:0098599,GO:0008474 interpro_family=IPR002472 interpro_raw=IPR002472,IPR029058,IPR030295 ec=3.1.2.22 id=c99592_g1_i6:1:547:2:+ interpro_domain=IPR029058 def=IPR002472:Palmitoyl protein thioesterase; IPR029058:Alpha/Beta hydrolase fold;	93.92	2	2	3	3		3.39699		4.45927		0	52.49		45.3	0		2		1		181	20.7594	5.49072
c68185_g1_i1:100:590:1:+	len=163 acc=c68185_g1_i1:100:590:1:+ id=c68185_g1_i1:100:590:1:+ interpro_domain=IPR000426,IPR029055 ec=3.4.25.- pathways= interpro_raw=IPR029055,IPR001353,IPR023332,IPR000426 go=GO:0051603,GO:0006511,GO:0019773,GO:0005839,GO:0004175,GO:0004298 interpro_family=IPR001353 def=IPR000426:Proteasome alpha-subunit, N-terminal domain; IPR001353:Proteasome, subunit alpha/beta; IPR029055:Nucleophile amino…	93.87	1	1	7	7		4.55604		7.48986	19.1865	0	29.45	0	21.47	75.46		1		2	4	163	17.6801	8.26514
c94870_g1_i1:1:1072:2:+	len=357 acc=c94870_g1_i1:1:1072:2:+ id=c94870_g1_i1:1:1072:2:+ interpro_raw=IPR024882 interpro_family=IPR024882 go=GO:0005643,GO:0006913 def=IPR024882:Nucleoporin p58/p45;	93.82	1	1	74	92	134.52	98.8103	77.0728	68.4068	95.1318	71.07	76.97	51.4	60.67	48.6	22	19	13	17	11	356	38.5197	8.35303
c86892_g1_i1:258:599:3:+	len=114	93.81	1	3	6	6	2.53482	4.89382	15.5512		7.55823	19.47	44.25	90.27		38.05	1	1	3		1	113	12.6345	7.09326
c103889_g3_i2:1:197:3:+	len=65 acc=c103889_g3_i2:1:197:3:+ interpro_raw=IPR003959,IPR027417 go=GO:0005524 interpro_domain=IPR003959,IPR027417 id=c103889_g3_i2:1:197:3:+ def=IPR003959:ATPase, AAA-type, core; IPR027417:P-loop containing nucleoside triphosphate hydrolase;	93.75	1	1	6	6	9.62515	26.0667			10.0878	85.94	90.63			75	1	4			1	64	6.91463	8.03076
c78657_g2_i1:1:335:1:+	len=111	93.69	1	1	7	7	4.42182	19.4781	3.87044			29.73	93.69	32.43	0	0	2	4	1			111	10.6521	4.86865
c102471_g2_i5:1:571:1:+	len=190 acc=c102471_g2_i5:1:571:1:+ go=GO:0005515 interpro_raw=IPR020683,IPR002110 interpro_domain=IPR020683 id=c102471_g2_i5:1:571:1:+ def=IPR020683:Ankyrin repeat-containing domain;	93.68	1	16	31	36	38.3219	25.5866	34.0534	24.537	78.992	93.68	72.63	56.84	65.79	80	9	5	5	5	9	190	21.0812	6.0874
c76613_g1_i1:1:525:2:+	len=174 acc=c76613_g1_i1:1:525:2:+ interpro_domain=IPR004087 id=c76613_g1_i1:1:525:2:+ interpro_raw=IPR004087,IPR004088 go=GO:0003723,GO:0003676 def=IPR004087:K Homology domain;	93.68	1	38	44	55	36.9775	69.864	29.5023	30.7641	109.993	68.39	92.53	51.15	66.67	91.95	9	13	7	7	15	174	18.2744	6.55127
c101312_g1_i4:1:333:1:+	len=111 acc=c101312_g1_i4:1:333:1:+ interpro_domain=IPR011009 id=c101312_g1_i4:1:333:1:+ interpro_raw=IPR000719,IPR011009 go=GO:0006468,GO:0004672,GO:0005524 def=IPR011009:Protein kinase-like domain;	93.64	1	1	5	5	7.55866	3.3098	5.58851		2.73144	39.09	48.18	31.82	0	20.91	1	1	2		1	110	13.2485	9.02686
c103356_g1_i1:1:334:3:+	len=110 acc=c103356_g1_i1:1:334:3:+ id=c103356_g1_i1:1:334:3:+ interpro_domain=IPR020683 go=GO:0005515 interpro_raw=IPR002110,IPR020683 def=IPR020683:Ankyrin repeat-containing domain;	93.64	1	3	10	12	23.6763	16.5686			15.7203	82.73	64.55	0		45.45	5	2			3	110	12.0194	5.79541
c99611_g2_i2:1:286:3:+	len=94 acc=c99611_g2_i2:1:286:3:+ id=c99611_g2_i2:1:286:3:+ interpro_domain=IPR020846 interpro_raw=IPR011701,IPR020846 go=GO:0055085,GO:0016021 interpro_family=IPR011701 def=IPR011701:Major facilitator superfamily; IPR020846:Major facilitator superfamily domain;	93.62	1	1	14	24	54.1205		21.3217	49.0549	21.2725	93.62		86.17	85.11	90.43	8		2	4	2	94	10.4816	5.90967
c69393_g2_i1:1:284:3:+	len=94 acc=c69393_g2_i1:1:284:3:+ id=c69393_g2_i1:1:284:3:+ interpro_domain=IPR011527 interpro_raw=IPR011527 go=GO:0016021,GO:0005524,GO:0055085,GO:0042626,GO:0006810 def=IPR011527:ABC transporter type 1, transmembrane domain;	93.62	1	1	4	4			8.98907		7.12397			93.62		47.87			3		1	94	10.9106	9.5542
c96957_g3_i1:73:402:1:+	len=110	93.58	1	15	19	25	13.6053	33.0115	21.0693	25.5398	6.95443	62.39	71.56	77.06	77.98	20.18	4	7	5	5	2	109	11.0553	4.01807
c104847_g1_i3:1:283:3:+	len=93 acc=c104847_g1_i3:1:283:3:+ interpro_domain=IPR020846 id=c104847_g1_i3:1:283:3:+ interpro_raw=IPR020846 def=IPR020846:Major facilitator superfamily domain;	93.55	1	1	6	6		4.30474	10.4067	14.4048	3.66048	0	46.24	82.8	93.55	62.37		1	2	2	1	93	9.8854	9.37842
CL3534Contig1:188:607:2:+	len=140	93.53	1	1	80	92	83.0099	112.31	75.4201	44.1658	100.146	75.54	84.89	65.47	92.81	90.65	17	25	16	11	17	139	14.252	8.55811
c81956_g1_i1:1:232:1:+	len=77	93.51	1	7	12	12		7.84861	21.5268	7.5483	16.4488		72.73	84.42	51.95	87.01		2	5	2	3	77	8.52431	8.74854
c104822_g2_i1:2232:2738:3:+	len=169 acc=c104822_g2_i1:2232:2738:3:+ interpro_raw=IPR008160 = id=c104822_g2_i1:2232:2738:3:+ def=IPR008160:Collagen triple helix repeat;	93.49	1	9	17	20	33.1655	24.7544	6.84757	3.57543	11.8061	76.33	51.48	71.01	18.34	56.21	7	6	4	1	2	169	17.5502	8.06006
c88420_g2_i1:1:280:3:+	len=92 acc=c88420_g2_i1:1:280:3:+ pathways=MetaCyc:PWY-5484,KEGG:ec00680+3.1.3.11,UniPathway:UPA00138,KEGG:ec00051+3.1.3.11,KEGG:ec00710+3.1.3.11,KEGG:ec00010+3.1.3.11,KEGG:ec00030+3.1.3.11 interpro_raw=IPR000146,IPR028343 interpro_family=IPR000146 go=GO:0042132,GO:0042578,GO:0005975 id=c88420_g2_i1:1:280:3:+ ec=3.1.3.11,3.1.-.- def=IPR000146:Fructose-1,6-bisphosphatase class 1/Sedoheputulose-1,7…	93.48	1	1	3	8		20.154	12.2927	9.69573	38.0541		82.61	83.7	83.7	93.48		1	1	1	3	92	9.83908	8.17725
c19823_g1_i1:1:228:1:+	len=76 acc=c19823_g1_i1:1:228:1:+ interpro_domain=IPR013783 id=c19823_g1_i1:1:228:1:+ go=GO:0005515 interpro_raw=IPR013783,IPR007110 def=IPR013783:Immunoglobulin-like fold;	93.42	1	6	8	19	19.2502	20.1372	16.8571	14.4671	4.17666	93.42	81.58	73.68	31.58	65.79	4	4	2	1	1	76	8.12789	4.42432
CL299Contig1:248:1204:2:+	len=319 acc=CL299Contig1:248:1204:2:+ id=CL299Contig1:248:1204:2:+ interpro_raw=IPR005351 interpro_family=IPR005351 def=IPR005351:Uncharacterised protein family UPF0139;	93.4	1	1	24	27	28.1234	37.7987	35.9439	11.905	21.6957	55.66	69.81	57.55	25.79	44.34	5	6	6	4	5	318	33.4255	5.23682
c91466_g1_i2:102:557:3:+	len=152 acc=c91466_g1_i2:102:557:3:+ id=c91466_g1_i2:102:557:3:+ interpro_domain=IPR012606 pathways= go=GO:0005622,GO:0005840,GO:0003735,GO:0006412 interpro_family=IPR000589 interpro_raw=IPR000589,IPR012606,IPR009068 def=IPR000589:Ribosomal protein S15; IPR012606:Ribosomal protein S13/S15, N-terminal;	93.38	1	1	10	11	7.77657	13.9914	2.70559	5.57522	9.72995	50.33	39.74	50.99	69.54	33.11	2	2	2	3	1	151	17.0914	10.5796
c101246_g3_i1:110:1240:2:+	len=377 acc=c101246_g3_i1:110:1240:2:+ id=c101246_g3_i1:110:1240:2:+ interpro_raw=IPR004001,IPR004000,IPR020902 interpro_family=IPR004000 def=IPR004000:Actin family;	93.35	1	18	50	150	64.7417	106.502	198.453	209.591	36.4092	25.27	58.78	37.23	56.12	32.98	11	17	21	22	6	376	41.7948	5.47803
c102631_g2_i1:984:1390:3:+	len=135	93.33	1	8	11	12	3.93796	8.54166	9.87983	16.8846		20	48.15	60	91.11	0	2	3	3	3		135	14.8397	8.11865
c81532_g1_i1:1:723:2:+	len=240 acc=c81532_g1_i1:1:723:2:+ interpro_domain=IPR020846 id=c81532_g1_i1:1:723:2:+ interpro_raw=IPR011701,IPR020846 interpro_family=IPR011701 go=GO:0016021,GO:0055085 def=IPR011701:Major facilitator superfamily; IPR020846:Major facilitator superfamily domain;	93.33	1	3	18	22	12.0061	37.3973	50.9564	16.2555	20.2701	28.75	61.25	66.25	40.42	47.5	2	4	5	4	3	240	26.7426	7.50342
c88366_g1_i1:17:289:2:+	len=91 acc=c88366_g1_i1:17:289:2:+ interpro_raw=IPR009053,IPR027235,IPR002777 go=GO:0016272,GO:0006457,GO:0051082 interpro_family=IPR009053,IPR027235 id=c88366_g1_i1:17:289:2:+ def=IPR009053:Prefoldin; IPR027235:Prefoldin subunit 2;	93.33	1	1	7	7	3.63887		7.23049		25.2396	52.22	0	57.78		92.22	1		2		4	90	9.88614	5.51611
c70427_g2_i1:1:312:1:+	len=104 acc=c70427_g2_i1:1:312:1:+ interpro_raw=IPR023298,IPR006068,IPR023214 id=c70427_g2_i1:1:312:1:+ interpro_domain=IPR023298,IPR023214,IPR006068 def=IPR006068:Cation-transporting P-type ATPase, C-terminal; IPR023214:HAD-like domain; IPR023298:P-type ATPase, transmembrane domain;	93.27	1	8	15	15	19.5157	20.246	10.3611	12.5693	12.4859	65.38	56.73	82.69	60.58	47.12	4	4	3	2	2	104	10.9646	4.50049
c94346_g1_i1:1:316:3:+	len=104 acc=c94346_g1_i1:1:316:3:+ interpro_domain=IPR015916 id=c94346_g1_i1:1:316:3:+ go=GO:0005515 interpro_raw=IPR006652,IPR015916 def=IPR015916:Galactose oxidase, beta-propeller;	93.27	1	1	3	3		8.09314				0	93.27	0	0			3				104	11.3593	6.91748
c98011_g1_i3:1:941:3:+	len=313 acc=c98011_g1_i3:1:941:3:+ id=c98011_g1_i3:1:941:3:+ interpro_domain=IPR013320 go=GO:0030246 interpro_raw=IPR013320,IPR001079 def=IPR013320:Concanavalin A-like lectin/glucanase domain;	93.27	1	1	18	21	34.7659	9.72925	9.89121	21.7224	38.4928	63.14	26.92	39.74	35.9	42.63	5	3	2	4	6	312	35.007	7.6499
c100630_g1_i1:17:808:2:+	len=264 acc=c100630_g1_i1:17:808:2:+ id=c100630_g1_i1:17:808:2:+ interpro_raw=IPR000618 interpro_family=IPR000618 go=GO:0042302 def=IPR000618:Insect cuticle protein;	93.18	1	1	28	30	35.2711	40.1075	31.1004	51.3142	51.3214	44.7	64.39	37.5	74.24	52.27	5	6	4	8	7	264	29.2257	7.38623
c85355_g2_i1:1:264:1:+	len=88 acc=c85355_g2_i1:1:264:1:+ interpro_raw=IPR001734 go=GO:0005215,GO:0006810,GO:0055085,GO:0016020 interpro_family=IPR001734 id=c85355_g2_i1:1:264:1:+ def=IPR001734:Sodium/solute symporter;	93.18	1	1	10	12	14.425	17.9554	4.2517	18.2934	6.00065	90.91	86.36	50	93.18	72.73	3	3	1	3	1	88	9.33196	5.09717
c105593_g3_i6:1050:2540:3:+	len=497 acc=c105593_g3_i6:1050:2540:3:+ interpro_domain=IPR020683 id=c105593_g3_i6:1050:2540:3:+ go=GO:0005515 interpro_raw=IPR002110,IPR020683 def=IPR020683:Ankyrin repeat-containing domain;	93.16	1	9	53	69	66.8494	76.9082	39.6671	76.5765	92.7688	48.69	54.12	56.14	47.69	55.73	15	13	8	11	11	497	53.8943	8.29443
c12136_g1_i1:1:354:1:+	len=118	93.16	1	37	42	56	34.0325	55.6246	20.1883	17.5186	12.3802	92.31	66.67	58.97	89.74	18.8	13	15	8	6	9	117	10.5532	8.19189
c84283_g2_i2:6:359:3:+	len=118 acc=c84283_g2_i2:6:359:3:+ id=c84283_g2_i2:6:359:3:+ interpro_raw=IPR008429 interpro_family=IPR008429 go=GO:0016021 def=IPR008429:Cleft lip and palate transmembrane 1;	93.16	2	6	7	16	37.6737	36.6128	10.123	2.88044	49.2994	73.5	81.2	58.12	56.41	70.09	2	2	1	1	4	117	13.41	9.14404
c89599_g2_i1:1:655:2:+	len=218 acc=c89599_g2_i1:1:655:2:+ id=c89599_g2_i1:1:655:2:+ interpro_domain=IPR012337 interpro_raw=IPR001584,IPR012337 go=GO:0003676,GO:0015074 def=IPR012337:Ribonuclease H-like domain;	93.09	1	7	16	21	14.766	21.3714		9.68884	22.4864	82.49	47.93	0	60.37	65.44	5	4		4	5	217	24.2555	9.5249
c89512_g1_i1:1:263:3:+	len=87 acc=c89512_g1_i1:1:263:3:+ interpro_raw=IPR013816,IPR005615 go=GO:0005524,GO:0004363,GO:0006750 interpro_family=IPR005615 pathways=UniPathway:UPA00142,KEGG:ec00480+6.3.2.3 id=c89512_g1_i1:1:263:3:+ interpro_domain=IPR013816 ec=6.3.2.3 def=IPR005615:Glutathione synthase, eukaryotic; IPR013816:ATP-grasp fold, subdomain 2;	93.02	1	1	7	7	8.67864	7.55211	8.42744	7.48173		54.65	59.3	88.37	46.51	0	2	2	2	1		86	9.38783	4.88135
c105593_g3_i1:1:816:1:+	len=272	93.01	1	15	28	38	29.8017	75.3068	20.7423	19.575	47.5678	82.35	72.43	33.82	48.9	46.69	8	12	3	3	7	272	28.7377	10.5063
c100190_g3_i2:1:176:3:+	len=58	92.98	1	1	1	2				4.11937					92.98					1		57	6.13789	5.10986
c97337_g2_i1:1:388:2:+	len=129 acc=c97337_g2_i1:1:388:2:+ pathways=KEGG:ec00500+2.7.1.1,KEGG:ec00520+2.7.1.1,MetaCyc:PWY-2722,KEGG:ec00524+2.7.1.1,KEGG:ec00052+2.7.1.1,MetaCyc:PWY-621,KEGG:ec00051+2.7.1.1,MetaCyc:PWY-5661,KEGG:ec00010+2.7.1.1,KEGG:ec00521+2.7.1.1 interpro_family=IPR001312 go=GO:0005975,GO:0046835,GO:0005536,GO:0004396,GO:0005524,GO:0001678,GO:0016773 interpro_raw=IPR022673,IPR001312 ec=2.7.1.1 id=c9733…	92.97	1	1	21	23	21.2295	47.2559	11.3871	32.5704	48.2223	68.75	75	48.44	80.47	92.97	4	5	2	5	6	128	13.4481	7.84033
c86112_g1_i1:1:217:2:+	len=72	92.96	1	3	12	17	4.74299	14.3276	7.97038	30.3861		64.79	69.01	91.55	85.92	0	2	2	3	6		71	7.28723	3.80225
c101227_g1_i1:2230:2444:3:-	len=71	92.86	1	10	21	24	13.1647	17.0029	37.4246	25.8149	14.0187	65.71	77.14	91.43	67.14	55.71	3	3	9	5	4	70	7.52384	11.4292
c95224_g1_i1:797:967:2:+	len=57	92.86	1	1	2	2	5.07532		2.95686			87.5	0	55.36			1		1			56	6.28529	7.23975
c96112_g1_i1:1597:1851:1:+	len=85	92.86	1	4	4	7	27.5791	9.81989	10.1569	2.72083	12.8048	92.86	79.76	92.86	20.24	92.86	2	1	1	1	1	84	9.54975	8.49951
CL1487Contig1:360:1283:3:+	len=308 acc=CL1487Contig1:360:1283:3:+ id=CL1487Contig1:360:1283:3:+ interpro_domain=IPR012677 go=GO:0003676,GO:0000166 interpro_raw=IPR012677,IPR000504 def=IPR012677:Nucleotide-binding alpha-beta plait domain;	92.83	1	5	20	27	52.9831	23.0669	33.0624	10.9473	3.69973	64.17	49.84	44.95	20.85	31.92	9	6	6	2	2	307	34.2092	4.83057
c103827_g1_i2:19:312:1:+	len=98 acc=c103827_g1_i2:19:312:1:+ go=GO:0005515 interpro_raw=IPR015943,IPR001680,IPR017986 interpro_domain=IPR015943 id=c103827_g1_i2:19:312:1:+ def=IPR015943:WD40/YVTN repeat-like-containing domain;	92.78	1	1	3	3		8.294	3.28061				48.45	44.33				2	1			97	10.9305	5.8335
c38109_g1_i1:1:253:3:+	len=83	92.77	1	1	4	5	7.89231		11.7248	3.13604	6.54234	62.65		62.65	33.73	89.16	1		2	1	1	83	9.06665	9.14404
c100153_g3_i2:120:1349:3:+	len=410 acc=c100153_g3_i2:120:1349:3:+ go=GO:0000166,GO:0003676 interpro_raw=IPR012677,IPR000504 interpro_domain=IPR012677 id=c100153_g3_i2:120:1349:3:+ def=IPR012677:Nucleotide-binding alpha-beta plait domain;	92.67	2	2	48	77	59.6468	111.844	78.6308	63.4602	61.9414	62.84	63.57	49.39	56.48	65.04	12	20	11	12	9	409	43.5563	6.94678
c105665_g1_i3:261:1565:3:+	len=435 acc=c105665_g1_i3:261:1565:3:+ id=c105665_g1_i3:261:1565:3:+ go=GO:0005515 interpro_family=IPR005420 interpro_raw=IPR011511,IPR001452,IPR001478 def=IPR005420:Tight junction protein ZO-3;	92.63	1	10	27	32	41.7378	36.268	27.3801	51.955	10.6856	51.15	64.52	40.32	38.94	25.35	6	8	5	6	3	434	45.9999	6.75635
c103841_g1_i2:1:523:1:+	len=174	92.53	1	1	33	34	25.7004	46.7294	47.806	31.202	9.00057	56.32	69.54	59.77	69.54	32.18	5	9	10	7	2	174	18.9684	5.03369
	>sp|CATD_HUMAN|	92.48	1	10	29	34	42.7357	20.3333	25.5651	7.70061	61.8618	62.86	39.32	32.52	23.54	67.72	8	5	6	2	9	412	44.5236	6.53662
c103589_g3_i2:1:720:1:+	len=240 acc=c103589_g3_i2:1:720:1:+ interpro_raw=IPR014044,IPR001283 interpro_family=IPR001283 id=c103589_g3_i2:1:720:1:+ def=IPR001283:Cysteine-rich secretory protein, allergen V5/Tpx-1-related;	92.47	1	15	28	33	3.81657	70.1697	15.6124	16.4279	17.4618	27.62	66.53	42.26	49.37	31.8	2	14	5	4	4	239	26.7259	5.18604
c99375_g1_i1:1:759:1:+	len=253 acc=c99375_g1_i1:1:759:1:+ interpro_domain=IPR013968 id=c99375_g1_i1:1:759:1:+ ec=1.-.-.- interpro_raw=IPR002347,IPR013968,IPR016040,IPR002198 interpro_family=IPR002347 go=GO:0008152,GO:0016491 def=IPR002347:Glucose/ribitol dehydrogenase; IPR013968:Polyketide synthase, ketoreductase domain;	92.46	1	11	17	21	24.5389	17.0454	35.1883	18.9736	24.6602	49.6	38.89	47.62	69.44	57.54	4	4	4	3	4	252	26.56	7.31299
c98312_g3_i1:1:163:2:+	len=54	92.45	1	1	3	5	8.47302	2.71424	2.60091			71.7	71.7	32.08	0	0	1	2	1			53	4.83368	10.0083
CL6404Contig1:2837:3583:2:+	len=249 acc=CL6404Contig1:2837:3583:2:+ interpro_raw=IPR029026,IPR029028,IPR001537 go=GO:0008173,GO:0003723,GO:0006396 interpro_domain=IPR029026,IPR029028 id=CL6404Contig1:2837:3583:2:+ ec=2.1.1.- def=IPR029026:tRNA (guanine-N1-)-methyltransferase, N-terminal; IPR029028:Alpha/beta knot methyltransferases;	92.37	1	2	13	17	27.4431	4.15557	22.9554	37.0451	5.76969	44.98	21.69	70.68	56.22	19.28	3	2	4	4	1	249	28.2422	5.26221
CL4947Contig1:1:161:3:+	len=53 acc=CL4947Contig1:1:161:3:+ interpro_raw=IPR013781,IPR017853 go=GO:0005975 id=CL4947Contig1:1:161:3:+ interpro_domain=IPR017853 def=IPR017853:Glycoside hydrolase superfamily;	92.31	1	1	1	1	5.28356					92.31					1					52	5.64779	8.04541
c105426_g2_i2:66:652:3:+	len=195 acc=c105426_g2_i2:66:652:3:+ id=c105426_g2_i2:66:652:3:+ = interpro_raw=IPR017868,IPR029874,IPR013783,IPR001298,IPR014756 go=GO:0003779,GO:0005515,GO:0030154,GO:0030036 interpro_family=IPR029874,IPR006407 def=IPR006407:1,4-alpha-glucan-branching enzyme, GlgB; IPR029874:Filamin-B;	92.31	1	2	20	24	49.4345	63.2962	17.9629	15.4822	15.8395	79.49	55.9	52.82	51.79	59.49	8	6	2	3	3	195	20.5584	6.52197
c107511_g1_i1:17:329:2:+	len=104 acc=c107511_g1_i1:17:329:2:+ go=GO:0005515 interpro_raw=IPR001680,IPR017986,IPR015943 interpro_domain=IPR015943 id=c107511_g1_i1:17:329:2:+ def=IPR015943:WD40/YVTN repeat-like-containing domain;	92.31	1	2	7	8	13.1727	5.37616	5.97932	2.46402		35.58	46.15	46.15	20.19	0	2	2	2	1		104	11.1966	7.02002
c69094_g1_i1:128:364:2:+	len=79 acc=c69094_g1_i1:128:364:2:+ id=c69094_g1_i1:128:364:2:+ interpro_family=IPR001727 go=GO:0016020 interpro_raw=IPR001727 def=IPR001727:Uncharacterised protein family UPF0016;	92.31	1	11	18	42	46.9138	19.1141	57.1287	30.1286	102.786	92.31	85.9	92.31	85.9	89.74	4	3	5	4	7	78	8.00825	7.18115
c80376_g1_i1:851:1047:2:+	len=65	92.31	1	1	4	5	3.57122	16.7535	3.43798			46.15	92.31	40	0		1	2	1			65	7.11435	8.73389
c91410_g2_i1:1:393:3:+	len=130 acc=c91410_g2_i1:1:393:3:+ ec=2.7.7.6 interpro_domain=IPR007066 id=c91410_g2_i1:1:393:3:+ go=GO:0006351,GO:0003677,GO:0003899 interpro_raw=IPR007066 pathways=KEGG:ec00230+2.7.7.6,KEGG:ec00240+2.7.7.6 def=IPR007066:RNA polymerase Rpb1, domain 3;	92.31	1	1	11	12	29.0698	10.7398	1.47351	12.6331	8.57028	63.85	57.69	36.92	68.46	43.08	2	3	2	2	2	130	14.5896	8.646
CL3319Contig1:232:546:1:+	len=105 acc=CL3319Contig1:232:546:1:+ interpro_family=IPR008011 interpro_raw=IPR008011 id=CL3319Contig1:232:546:1:+ def=IPR008011:Complex 1 LYR protein;	92.31	1	1	4	5			14.1628		10.6348			26.92		92.31			2		2	104	12.0224	9.46631
c105348_g2_i1:1:1480:3:+	len=492 acc=c105348_g2_i1:1:1480:3:+ id=c105348_g2_i1:1:1480:3:+ interpro_domain=IPR015255,IPR001747 pathways= go=GO:0006869,GO:0005319 interpro_raw=IPR011030,IPR015255,IPR015818,IPR001747,IPR015819 def=IPR001747:Lipid transport protein, N-terminal; IPR015255:Vitellinogen, open beta-sheet;	92.28	1	492	503	4501	5807.7	4323.84	4694.56	3649.47	3141.9	82.11	73.98	80.28	79.88	64.02	283	273	329	266	177	492	55.4267	8.98291
c103432_g1_i2:1310:3013:2:+	len=568	92.24	1	60	79	106	91.8545	91.8921	89.9186	56.658	106.242	67.37	69.14	80.6	35.1	57.32	21	23	22	9	14	567	62.0275	8.68994
c69487_g1_i1:1:233:3:+	len=77 acc=c69487_g1_i1:1:233:3:+ interpro_raw=IPR020846,IPR005828 interpro_family=IPR005828 go=GO:0016021,GO:0055085,GO:0022857 interpro_domain=IPR020846 id=c69487_g1_i1:1:233:3:+ def=IPR005828:General substrate transporter; IPR020846:Major facilitator superfamily domain;	92.21	1	1	3	4	23.5155			3.16385		79.22			33.77		2			1		77	8.30437	8.20654
c104994_g4_i1:138:716:3:+	len=193 acc=c104994_g4_i1:138:716:3:+ id=c104994_g4_i1:138:716:3:+ interpro_raw=IPR008907 interpro_family=IPR008907 def=IPR008907:P25-alpha;	92.19	1	5	16	16	5.17818	12.7393	11.8263	14.2836	20.7827	27.6	41.15	53.65	56.77	68.75	1	3	2	4	6	192	20.8877	9.14404
c57102_g1_i1:1:309:3:+	len=102	92.16	1	57	62	80	54.4212	70.2723	52.7227	14.8794	50.1034	91.18	77.45	77.45	69.61	79.41	18	24	13	5	10	102	11.4248	6.23975
c84923_g1_i1:1:309:3:+	len=102 acc=c84923_g1_i1:1:309:3:+ interpro_domain=IPR000008 id=c84923_g1_i1:1:309:3:+ interpro_raw=IPR000008,IPR029996 interpro_family=IPR029996 go=GO:0016079,GO:0016021,GO:0005515,GO:0005509 def=IPR000008:C2 domain; IPR029996:Otoferlin;	92.16	1	2	7	7	17.8662	8.72531		8.57159	12.9524	70.59	76.47		65.69	53.92	3	1		1	2	102	11.4489	5.97314
c61403_g2_i1:1:267:1:+	len=89 acc=c61403_g2_i1:1:267:1:+ interpro_raw=IPR013781 go=GO:0005975 id=c61403_g2_i1:1:267:1:+ interpro_domain=IPR013781 def=IPR013781:Glycoside hydrolase, catalytic domain;	92.13	1	2	3	3		4.12118			3.42378	0	92.13	0	0	78.65		2			1	89	9.64242	5.2876
c100376_g2_i5:1:304:1:+	len=101 acc=c100376_g2_i5:1:304:1:+ go=GO:0005515 interpro_raw=IPR020683,IPR002110 interpro_domain=IPR020683 id=c100376_g2_i5:1:304:1:+ def=IPR020683:Ankyrin repeat-containing domain;	92.08	1	2	4	4	7.10619	12.725	2.6957			72.28	82.18	25.74	0		2	1	1			101	10.7164	5.32568
c101519_g1_i3:257:1315:2:+	len=353 acc=c101519_g1_i3:257:1315:2:+ go=GO:0016491,GO:0055114,GO:0008270 interpro_family=IPR002085 interpro_raw=IPR020843,IPR002085,IPR016040,IPR013149,IPR011032 ec=1.-.-.- id=c101519_g1_i3:257:1315:2:+ interpro_domain=IPR020843,IPR016040 def=IPR002085:Alcohol dehydrogenase superfamily, zinc-type; IPR016040:NAD(P)-binding domain; IPR020843:Polyketide synthase, enoylreductase domain;	92.07	1	25	49	64	81.3249	111.575	82.8634	55.4046	40.6644	50.71	75.64	54.39	43.63	44.76	13	18	9	9	7	353	38.5192	9.02686
c105915_g1_i1:1:266:3:+	len=88 acc=c105915_g1_i1:1:266:3:+ interpro_raw=IPR002018,IPR019826,IPR029058 id=c105915_g1_i1:1:266:3:+ interpro_domain=IPR029058 def=IPR029058:Alpha/Beta hydrolase fold;	92.05	1	4	4	15	19.5514		3.72523		41.6777	37.5		37.5		92.05	1		1		4	88	9.41098	5.2876
c108524_g1_i1:1:266:3:+	len=88	92.05	1	3	4	4	3.87825	2.92152	11.2623			20.45	92.05	63.64			1	2	1			88	9.61369	9.75928
CL4730Contig1:709:1308:1:+	len=200	91.96	1	24	51	74	73.9264	112.832	62.2966	36.5478	120.503	80.4	56.78	51.76	32.66	74.87	13	14	9	6	19	199	21.7914	9.08545
CL4274Contig1:1:450:3:+	len=149	91.95	1	1	12	12	9.41472	2.44114	14.9551	9.03013	9.34384	38.26	22.82	55.03	59.06	32.89	3	1	4	2	2	149	16.7612	4.70361
c92492_g1_i2:1:297:1:+	len=99	91.92	2	1	2	2		2.74012			4.13747	0	52.53	0	0	76.77		1			1	99	9.54948	4.08154
c74817_g1_i1:1:224:1:+	len=74 acc=c74817_g1_i1:1:224:1:+ interpro_domain=IPR020683 id=c74817_g1_i1:1:224:1:+ go=GO:0005515 interpro_raw=IPR002110,IPR020683 def=IPR020683:Ankyrin repeat-containing domain;	91.89	1	1	2	4	8.16058	16.0035	10.7288			82.43	91.89	91.89			1	1	1			74	7.70496	6.0874
c92889_g2_i3:457:606:1:-	len=50	91.84	1	1	3	3	4.39929			3.3692	5.80757	67.35			48.98	91.84	1			1	1	49	5.49771	5.66846
c88095_g1_i1:97:246:1:+	len=50	91.84	1	1	1	4				9.42033	10.1322		0	0	91.84	91.84				1	1	49	4.8366	10.3599
c97663_g1_i3:286:762:1:+	len=159 acc=c97663_g1_i3:286:762:1:+ interpro_raw=IPR027705,IPR001107 interpro_family=IPR001107 id=c97663_g1_i3:286:762:1:+ def=IPR001107:Band 7 protein;	91.82	1	1	11	12	36.212	3.43475	5.2291	3.46607	24.7518	79.87	20.13	18.87	13.84	44.65	5	2	1	1	3	159	18.0252	5.32568
c105129_g1_i2:1:224:3:+	len=74 acc=c105129_g1_i2:1:224:3:+ interpro_raw=IPR007667 id=c105129_g1_i2:1:224:3:+ interpro_domain=IPR007667 def=IPR007667:Hypoxia induced protein, domain;	91.78	1	1	6	10	14.9773	13.2473		2.55888	20.815	87.67	90.41	0	21.92	91.78	1	2		1	4	73	8.03823	9.99365
c105886_g3_i3:498:937:3:+	len=146 acc=c105886_g3_i3:498:937:3:+ = interpro_raw=IPR017868,IPR014756,IPR001298,IPR013783 go=GO:0005515 interpro_family=IPR006407 id=c105886_g3_i3:498:937:3:+ def=IPR006407:1,4-alpha-glucan-branching enzyme, GlgB;	91.78	1	1	15	21	6.57668	34.2504	6.33434	22.9832	23.048	23.29	91.1	32.88	84.25	71.92	2	6	3	4	4	146	15.534	6.27783
CL2001Contig1:1:1278:1:+	len=426	91.76	1	20	51	90	71.1867	47.1368	54.8048	135.641	25.4872	68.71	78.82	55.53	59.53	66.12	13	14	9	13	8	425	44.4974	9.36377
CL388Contig2:1898:2080:3:-	len=61 acc=CL388Contig2:1898:2080:3:- id=CL388Contig2:1898:2080:3:- interpro_family=IPR006721 go=GO:0046933,GO:0000275,GO:0015986,GO:0046961 interpro_raw=IPR006721 def=IPR006721:ATPase, F1 complex, epsilon subunit, mitochondrial;	91.67	2	4	4	22	9.08918	10.3108	29.5762	36.7053	10.9314	55	55	55	55	91.67	1	1	2	3	2	60	6.85566	10.4331
c101355_g1_i11:413:739:2:+	len=109 acc=c101355_g1_i11:413:739:2:+ interpro_raw=IPR000618 go=GO:0042302 interpro_family=IPR000618 id=c101355_g1_i11:413:739:2:+ def=IPR000618:Insect cuticle protein;	91.67	4	1	8	8	18.7568	11.0702	1.48584		2.38054	91.67	80.56	11.11	0	26.85	4	2	1		1	108	11.5097	4.4751
c112631_g1_i1:1:256:3:+	len=84 acc=c112631_g1_i1:1:256:3:+ interpro_family=IPR026983 go=GO:0003777,GO:0007018 interpro_raw=IPR026983 id=c112631_g1_i1:1:256:3:+ def=IPR026983:Dynein heavy chain;	91.67	1	1	8	10	2.98339	21.6425		15.8195	22.1516	64.29	80.95		77.38	89.29	1	3		2	3	84	9.35206	9.36377
c8778_g1_i1:95:276:2:+	len=60 acc=c8778_g1_i1:95:276:2:+ interpro_domain=IPR027413 id=c8778_g1_i1:95:276:2:+ pathways= interpro_family=IPR002423 go=GO:0051082,GO:0005524,GO:0006457 interpro_raw=IPR002194,IPR027413,IPR002423,IPR017998 def=IPR002423:Chaperonin Cpn60/TCP-1 family; IPR027413:GroEL-like equatorial domain;	91.67	1	1	4	4	5.42479	7.03853	8.79214			45	91.67	76.67			1	1	2			60	6.28614	4.42432
c77375_g1_i1:1:217:1:+	len=72 acc=c77375_g1_i1:1:217:1:+ interpro_raw=IPR027806 interpro_domain=IPR027806 id=c77375_g1_i1:1:217:1:+ def=IPR027806:Harbinger transposase-derived nuclease domain;	91.67	1	1	6	7		3.81718			24.6862		52.78			91.67		1			5	72	8.29429	9.81787
c103635_g1_i2:1:899:2:+	len=299 acc=c103635_g1_i2:1:899:2:+ interpro_raw=IPR000467 go=GO:0003676 id=c103635_g1_i2:1:899:2:+ interpro_domain=IPR000467 def=IPR000467:G-patch domain;	91.64	2	2	25	31	27.2895	50.1781	27.6307	25.0486	57.4348	50.5	63.21	37.79	50.84	72.58	5	6	5	5	8	299	33.1384	8.90967
CL3160Contig1:491:2136:2:+	len=548 acc=CL3160Contig1:491:2136:2:+ interpro_domain=IPR013087,IPR011991 id=CL3160Contig1:491:2136:2:+ go=GO:0006355,GO:0003676,GO:0043565,GO:0003700 interpro_raw=IPR013087,IPR001766,IPR011991 def=IPR011991:Winged helix-turn-helix DNA-binding domain; IPR013087:Zinc finger C2H2-type/integrase DNA-binding domain;	91.61	2	16	74	100	95.5477	81.0717	95.1177	59.355	190.656	43.8	57.66	48.72	40.51	66.79	14	15	16	9	28	548	61.5181	7.91357
c97627_g3_i3:180:644:3:+	len=155	91.61	1	1	10	11	18.2373	20.8952	4.51662	5.56758	9.73846	58.06	50.32	33.55	40.65	79.35	3	3	1	1	2	155	16.473	8.01611
c99476_g2_i1:25:490:1:+	len=155 acc=c99476_g2_i1:25:490:1:+ go=GO:0034244,GO:0032021 interpro_family=IPR026305 interpro_raw=IPR026305 id=c99476_g2_i1:25:490:1:+ def=IPR026305:Negative elongation factor A;	91.61	1	4	7	8	4.55378	6.53865		3.71926	19.1646	23.87	43.23	0	29.03	54.19	2	2		1	2	155	17.4192	9.15869
c103659_g3_i1:1:360:1:+	len=120	91.6	1	1	13	18		20.5903	11.4375	17.896	23.1725		79.83	49.58	57.14	79.83		4	3	4	3	119	11.8656	9.5542
c81614_g2_i1:1:501:2:+	len=166 acc=c81614_g2_i1:1:501:2:+ interpro_family=IPR001930 go=GO:0008270,GO:0006508,GO:0008237 interpro_raw=IPR001930,IPR014782 id=c81614_g2_i1:1:501:2:+ def=IPR001930:Peptidase M1, alanine aminopeptidase/leukotriene A4 hydrolase;	91.57	1	8	10	15	6.51309	3.9705	9.51522	3.15938	23.5035	40.96	29.52	39.16	19.28	75.3	1	1	3	1	4	166	18.7682	4.48779
c102905_g1_i1:842:1306:2:+	len=155	91.56	1	8	12	12	15.7747	20.0604	5.56884	5.61873	18.0135	66.23	74.68	20.13	20.78	55.19	2	3	1	2	4	154	17.3822	9.62744
c99764_g3_i6:299:763:2:+	len=155	91.56	1	2	13	14	5.71168	8.64868		29.5116	51.8106	20.13	48.7	0	70.13	82.47	1	3		4	6	154	16.2135	9.5542
c101891_g2_i3:96:1199:3:+	len=368 acc=c101891_g2_i3:96:1199:3:+ interpro_domain=IPR012677 id=c101891_g2_i3:96:1199:3:+ interpro_raw=IPR000504,IPR012677 go=GO:0000166,GO:0003676 def=IPR012677:Nucleotide-binding alpha-beta plait domain;	91.55	2	48	54	73	67.4406	38.4932	60.1097	147.729	36.1204	79.02	71.66	48.77	63.22	44.41	14	12	12	21	7	367	38.2728	5.17334
c72217_g3_i1:1:215:2:+	len=71 acc=c72217_g3_i1:1:215:2:+ interpro_domain=IPR000700,IPR000014 id=c72217_g3_i1:1:215:2:+ ec=2.7.3.- interpro_raw=IPR000700,IPR000014 go=GO:0000155,GO:0000160 def=IPR000014:PAS domain; IPR000700:PAS-associated, C-terminal;	91.55	1	1	3	3	8.789	5.00102		2.63084		64.79	59.15		46.48	0	1	1		1		71	7.743	4.56396
c105344_g2_i1:29:634:2:+	len=202 acc=c105344_g2_i1:29:634:2:+ interpro_raw=IPR000618 go=GO:0042302 interpro_family=IPR000618 id=c105344_g2_i1:29:634:2:+ def=IPR000618:Insect cuticle protein;	91.54	1	3	16	16	4.918	15.4039	14.0531	11.2228	7.12165	36.32	45.77	51.24	55.72	72.14	2	6	3	3	2	201	20.559	7.32764
c99869_g2_i3:1:391:2:+	len=130	91.54	1	24	26	30	54.2222	5.49964	24.8531	19.9453	61.2731	75.38	62.31	58.46	65.38	88.46	8	2	5	3	9	130	13.6524	12.7769
c90972_g2_i1:104:673:2:+	len=190	91.53	1	1	19	23	13.0415	18.7227	9.61608	23.8389	32.7376	38.1	67.2	47.09	71.43	91.53	3	3	3	5	7	189	19.5181	4.15771
c102904_g1_i2:192:650:3:+	len=153 acc=c102904_g1_i2:192:650:3:+ id=c102904_g1_i2:192:650:3:+ interpro_domain=IPR011074,IPR001251 interpro_raw=IPR011074,IPR001251 def=IPR001251:CRAL-TRIO domain; IPR011074:CRAL/TRIO, N-terminal domain;	91.5	1	1	10	10	38.2548			19.7818		67.32	0		88.24	0	6			4		153	17.3128	5.09717
c99067_g1_i1:89:550:2:+	len=154	91.5	1	1	83	93	66.0797	100.031	93.8785	52.5397	109.547	66.67	66.01	78.43	90.85	78.43	16	23	19	13	18	153	15.9599	9.15869
c105163_g2_i1:3856:4704:1:+	len=283	91.49	1	33	44	62	86.4284	53.4129	63.3338	27.7509	26.4933	67.38	61.7	74.11	45.39	53.9	13	11	15	7	6	282	29.8743	10.0815
c95969_g1_i2:35:565:2:+	len=177	91.48	1	3	48	54	71.9784	43.1094	29.7504	35.3164	106.6	50	67.61	42.61	61.93	69.32	12	10	6	7	16	176	19.3917	10.3745
c99400_g1_i1:1:1411:2:+	len=470 acc=c99400_g1_i1:1:1411:2:+ id=c99400_g1_i1:1:1411:2:+ interpro_domain=IPR020846 interpro_raw=IPR010291,IPR020846 interpro_family=IPR010291 def=IPR010291:Ion channel regulatory protein, UNC-93; IPR020846:Major facilitator superfamily domain;	91.47	1	3	40	58	51.2766	57.7196	22.4848	33.2515	19.9381	50.53	78.68	45.42	55.01	39.45	11	11	9	8	7	469	50.4756	7.95752
c16735_g2_i1:1:213:2:+	len=70 acc=c16735_g2_i1:1:213:2:+ interpro_domain=IPR020568 id=c16735_g2_i1:1:213:2:+ ec=3.4.21.- interpro_raw=IPR008269,IPR014721,IPR027065,IPR020568 interpro_family=IPR027065 go=GO:0004176,GO:0030163,GO:0004252,GO:0006508,GO:0005524 def=IPR020568:Ribosomal protein S5 domain 2-type fold; IPR027065:Lon protease;	91.43	1	1	2	2	2.65009		6.13246			32.86		91.43			1		1			70	7.6049	5.68115
c80525_g1_i1:1:214:3:+	len=70 acc=c80525_g1_i1:1:214:3:+ interpro_raw=IPR016040 id=c80525_g1_i1:1:214:3:+ interpro_domain=IPR016040 def=IPR016040:NAD(P)-binding domain;	91.43	1	2	10	17	14.0724	9.8497	16.8976	13.2899	29.6969	80	91.43	68.57	80	84.29	3	2	2	2	4	70	7.45393	6.50732
CL6420Contig1:139:1224:1:+	len=362	91.41	1	2	34	37	10.8906	78.4485	37.4174	7.64064	35.7291	49.31	77.29	41.55	18.56	39.89	6	15	7	2	6	361	39.0501	8.67529
c93296_g1_i1:1:492:1:+	len=164 acc=c93296_g1_i1:1:492:1:+ interpro_domain=IPR020846 id=c93296_g1_i1:1:492:1:+ interpro_raw=IPR011701,IPR020846 interpro_family=IPR011701 go=GO:0055085,GO:0016021 def=IPR011701:Major facilitator superfamily; IPR020846:Major facilitator superfamily domain;	91.41	1	2	9	10	2.89802	14.2691	16.6641	11.0741	4.39927	28.83	59.51	51.53	35.58	31.29	1	2	2	3	1	163	17.7603	6.29053
c32438_g1_i1:1:244:2:+	len=81 acc=c32438_g1_i1:1:244:2:+ interpro_raw=IPR013845,IPR000876 go=GO:0005840,GO:0003735,GO:0005622,GO:0006412 interpro_family=IPR000876 id=c32438_g1_i1:1:244:2:+ def=IPR000876:Ribosomal protein S4e;	91.36	1	1	12	12	28.446	18.9032	6.23747	6.82799	27.8659	91.36	59.26	81.48	64.2	72.84	4	3	1	1	3	81	8.84764	10.1987
c97428_g1_i1:120:920:3:+	len=267 acc=c97428_g1_i1:120:920:3:+ interpro_domain=IPR005639 id=c97428_g1_i1:120:920:3:+ interpro_raw=IPR005639,IPR006746 interpro_family=IPR006746 go=GO:0005838,GO:0009405,GO:0006508 def=IPR005639:Delta endotoxin, N-terminal; IPR006746:26S proteasome non-ATPase regulatory subunit Rpn12;	91.35	1	1	17	21	62.8448	14.5087	16.0828	13.9736	32.8229	89.85	43.23	53.76	30.45	43.98	6	4	4	2	2	266	30.5939	5.75732
c104507_g4_i1:1:212:3:+	len=70 acc=c104507_g4_i1:1:212:3:+ id=c104507_g4_i1:1:212:3:+ ec=3.4.-.- interpro_raw=IPR025660,IPR013128,IPR000668 interpro_family=IPR013128 go=GO:0008234,GO:0006508 def=IPR013128:Peptidase C1A; IPR025660:Cysteine peptidase, histidine active site;	91.3	1	2	3	3	2.51765	2.309		3.33182		52.17	36.23		36.23	0	1	1		1		69	7.23065	6.23975
c111725_g1_i1:1:212:3:+	len=70 acc=c111725_g1_i1:1:212:3:+ pathways=UniPathway:UPA00143 interpro_raw=IPR001841,IPR013083,IPR024766 go=GO:0008270,GO:0005515 interpro_domain=IPR013083 id=c111725_g1_i1:1:212:3:+ def=IPR013083:Zinc finger, RING/FYVE/PHD-type;	91.3	1	1	2	2			8.1601			0		91.3	0				2			69	8.08664	6.48096
c85861_g2_i1:101:241:2:+	len=47	91.3	1	1	2	2		2.99089			4.59906		73.91			54.35		1			1	46	5.04971	11.0044
c59006_g1_i1:1:412:1:+	len=137 acc=c59006_g1_i1:1:412:1:+ id=c59006_g1_i1:1:412:1:+ interpro_domain=IPR004088 interpro_raw=IPR004088 go=GO:0003723 def=IPR004088:K Homology domain, type 1;	91.24	1	1	9	12		59.0937	6.23799	7.59157		0	91.24	23.36	60.58			5	2	2		137	15.496	6.354
c96553_g1_i1:1:106:2:+	len=35	91.18	1	1	2	2	1.47333	3.62821				35.29	91.18		0	0	1	1				34	3.56466	4.99561
c99407_g1_i3:1:1089:1:+	len=363 acc=c99407_g1_i3:1:1089:1:+ id=c99407_g1_i3:1:1089:1:+ ec=1.2.1.- pathways=KEGG:ec00010+1.2.1.12,KEGG:ec00710+1.2.1.12,MetaCyc:PWY-5484,MetaCyc:PWY-6901,UniPathway:UPA00109,MetaCyc:PWY-1042,MetaCyc:PWY-7003 interpro_raw=IPR006424,IPR020829,IPR020831,IPR020830,IPR020828,IPR016040 interpro_family=IPR020831 go=GO:0016620,GO:0050661,GO:0055114,GO:0006006,GO:0051287 def=IPR020831:Glyceraldehyd…	91.16	1	95	98	274	549.929	337.219	196.332	106.42	159.405	74.31	81.49	59.12	57.73	66.02	57	37	29	21	18	362	38.551	8.5874
c98749_g3_i1:1:343:2:+	len=114 acc=c98749_g3_i1:1:343:2:+ id=c98749_g3_i1:1:343:2:+ interpro_domain=IPR029058 interpro_raw=IPR002018,IPR029058 def=IPR029058:Alpha/Beta hydrolase fold;	91.15	1	1	20	31	61.863	44.9173	47.6389	14.9164	14.5856	68.14	82.3	61.95	62.83	60.18	9	6	5	3	2	113	12.4894	4.7417
CL2349Contig1:42:413:3:+	len=124 acc=CL2349Contig1:42:413:3:+ id=CL2349Contig1:42:413:3:+ ec=1.-.-.- interpro_raw=IPR002198,IPR016040,IPR002347 go=GO:0008152,GO:0016491 interpro_family=IPR002347 def=IPR002347:Glucose/ribitol dehydrogenase;	91.13	1	1	9	11	6.09826	3.34659	10.0092	10.5474	12.463	39.52	23.39	54.03	56.45	69.35	1	1	2	4	2	124	13.7341	6.53662
c104502_g2_i2:233:742:2:+	len=170 acc=c104502_g2_i2:233:742:2:+ id=c104502_g2_i2:233:742:2:+ interpro_raw=IPR012423 interpro_family=IPR012423 go=GO:0043189,GO:0006355,GO:0005634 def=IPR012423:Chromatin modification-related protein Eaf7/MRGBP;	91.12	1	1	7	7	10.8949		4.47492		3.92563	53.25		16.57		42.6	4		1		2	169	19.4488	7.43018
c103113_g1_i2:228:2660:3:+	len=811 acc=c103113_g1_i2:228:2660:3:+ interpro_domain=IPR020846 id=c103113_g1_i2:228:2660:3:+ interpro_raw=IPR011701,IPR020846 interpro_family=IPR011701 go=GO:0055085,GO:0016021 def=IPR011701:Major facilitator superfamily; IPR020846:Major facilitator superfamily domain;	91.11	2	5	58	63	96.3973	84.0668	58.6239	24.6388	27.2994	60.74	48.77	39.88	17.28	38.89	19	17	12	5	6	810	86.5667	5.17334
c102202_g1_i3:1:505:2:+	len=168 acc=c102202_g1_i3:1:505:2:+ id=c102202_g1_i3:1:505:2:+ ec=1.-.-.- interpro_raw=IPR002347,IPR002198,IPR016040 go=GO:0016491,GO:0008152 interpro_family=IPR002347 def=IPR002347:Glucose/ribitol dehydrogenase;	91.07	1	1	8	9	17.9886	11.8778	7.06891	4.77169		44.64	57.14	41.07	30.36	0	3	2	2	1		168	18.0585	7.10791
c94185_g3_i1:27:731:3:+	len=235 acc=c94185_g3_i1:27:731:3:+ interpro_domain=IPR000873 id=c94185_g3_i1:27:731:3:+ go=GO:0003824,GO:0008152 interpro_raw=IPR000873,IPR020845 def=IPR000873:AMP-dependent synthetase/ligase;	91.06	1	1	11	13	5.60548	21.1438	8.28146	24.5462	3.50583	46.38	70.64	40.85	58.3	24.26	2	3	2	4	1	235	26.5696	8.29443
CL3279Contig1:169:1506:1:+	len=446 acc=CL3279Contig1:169:1506:1:+ interpro_raw=IPR011765,IPR011237,IPR007863,IPR011249 go=GO:0003824,GO:0046872 interpro_domain=IPR011249 id=CL3279Contig1:169:1506:1:+ def=IPR011249:Metalloenzyme, LuxS/M16 peptidase-like;	91.01	1	91	108	140	269.892	101.039	170.308	129.629	380.709	64.27	71.01	51.69	66.74	65.39	33	19	22	17	40	445	46.2373	9.26123
c103496_g1_i1:439:1440:1:+	len=334 acc=c103496_g1_i1:439:1440:1:+ id=c103496_g1_i1:439:1440:1:+ interpro_domain=IPR004853 interpro_raw=IPR004853 def=IPR004853:Triose-phosphate transporter domain;	90.99	2	31	36	52	77.4748	23.1112	29.3396	38.587	93.4329	56.46	42.64	56.76	44.74	39.64	13	5	6	5	12	333	37.3334	8.5874
c105116_g2_i4:394:4185:1:+	len=1264 acc=c105116_g2_i4:394:4185:1:+ go=GO:0005515,GO:0000166,GO:0003676 interpro_raw=IPR000504,IPR012677,IPR015940,IPR009060,IPR026805 id=c105116_g2_i4:394:4185:1:+ interpro_domain=IPR012677,IPR015940,IPR009060,IPR026805 def=IPR009060:UBA-like; IPR012677:Nucleotide-binding alpha-beta plait domain; IPR015940:Ubiquitin-associated/translation elongation factor EF1B, N-terminal, eukaryote; IPR026…	90.97	3	110	218	271	232.809	264.469	218.777	235.476	134.338	71.5	79.26	78.38	64.13	61.84	52	68	50	43	25	1263	134.726	6.60986
CL6763Contig1:316:813:1:+	len=166 acc=CL6763Contig1:316:813:1:+ id=CL6763Contig1:316:813:1:+ interpro_raw=IPR000618 go=GO:0042302 interpro_family=IPR000618 def=IPR000618:Insect cuticle protein;	90.91	1	24	52	64	33.9398	71.3833	65.2842	50.4459	50.6579	88.48	53.94	60.61	76.36	74.55	9	14	16	11	10	165	16.1191	7.72314
c100704_g1_i8:63:197:3:+	len=45	90.91	1	2	3	5	4.73613	6.23848	5.81805	2.62916		81.82	81.82	59.09	52.27		1	1	1	1		44	4.76937	4.729
c101942_g3_i1:61:921:1:+	len=287 acc=c101942_g3_i1:61:921:1:+ interpro_raw=IPR011989,IPR016024,IPR000225 go=GO:0005488,GO:0005515 id=c101942_g3_i1:61:921:1:+ interpro_domain=IPR016024 def=IPR016024:Armadillo-type fold;	90.91	1	1	13	14	8.66626	3.03296	26.5684	19.3485	3.62322	25.87	37.41	53.85	55.94	27.27	1	2	5	4	2	286	31.3994	7.02002
c67704_g2_i1:1:432:2:+	len=143 acc=c67704_g2_i1:1:432:2:+ id=c67704_g2_i1:1:432:2:+ ec=2.7.7.- interpro_raw=IPR007238 go=GO:0006269,GO:0003896 interpro_family=IPR007238 def=IPR007238:DNA primase large subunit, eukaryotic/archaeal;	90.91	1	1	4	4	17.428	3.24025				90.91	30.07		0		3	1				143	16.4948	9.5835
c87358_g1_i1:165:332:3:+	len=56 acc=c87358_g1_i1:165:332:3:+ interpro_raw=IPR012340 interpro_domain=IPR012340 id=c87358_g1_i1:165:332:3:+ def=IPR012340:Nucleic acid-binding, OB-fold;	90.91	1	2	3	4	6.14734				7.58269	60				89.09	1				2	55	5.97975	4.50049
c105907_g2_i1:1:169:2:+	len=56	90.91	1	2	3	3		2.4317			9.915		43.64			90.91		1			2	55	5.83395	5.10986
c105988_g1_i1:80:672:2:+	len=197 acc=c105988_g1_i1:80:672:2:+ interpro_domain=IPR020846 id=c105988_g1_i1:80:672:2:+ interpro_family=IPR011701 go=GO:0016021,GO:0055085 interpro_raw=IPR020846,IPR011701 def=IPR011701:Major facilitator superfamily; IPR020846:Major facilitator superfamily domain;	90.86	1	17	29	44	26.6674	32.5381	28.6448	27.5422	113.714	51.78	76.14	56.85	70.56	90.86	6	5	4	6	12	197	21.3242	9.93506
c80964_g1_i1:1:328:2:+	len=109 acc=c80964_g1_i1:1:328:2:+ id=c80964_g1_i1:1:328:2:+ interpro_raw=IPR004875 go=GO:0003676 interpro_family=IPR004875 def=IPR004875:DDE superfamily endonuclease, CENP-B-like;	90.83	1	1	11	12	19.207	24.1174	13.9679			88.99	83.49	60.55	0		3	5	3			109	12.1633	9.49561
c99486_g1_i1:1:263:1:+	len=87 acc=c99486_g1_i1:1:263:1:+ interpro_raw=IPR001816,IPR014039,IPR018101 go=GO:0003746,GO:0006414,GO:0005622 interpro_family=IPR001816 id=c99486_g1_i1:1:263:1:+ def=IPR001816:Translation elongation factor EFTs/EF1B;	90.8	1	1	11	13	22.0161	41.472	18.5662			64.37	90.8	49.43			4	4	3			87	9.65791	7.95752
c104405_g3_i8:1:916:2:+	len=305 acc=c104405_g3_i8:1:916:2:+ interpro_raw=IPR018483,IPR018485 go=GO:0016773,GO:0005975 pathways=MetaCyc:PWY-4261,UniPathway:UPA00618,KEGG:ec00561+2.7.1.30 id=c104405_g3_i8:1:916:2:+ interpro_domain=IPR018485 ec=2.7.1.- def=IPR018485:Carbohydrate kinase, FGGY, C-terminal;	90.79	1	1	23	25	52.3723	12.18	18.5597	24.6308	42.0938	69.41	26.32	40.13	54.61	55.59	7	2	3	5	6	304	33.4449	6.37939
c104837_g3_i8:945:1401:3:+	len=152 acc=c104837_g3_i8:945:1401:3:+ interpro_family=IPR001250 go=GO:0008270,GO:0005975,GO:0004476,GO:0009298 interpro_raw=IPR018050,IPR011051,IPR016305,IPR001250,IPR014710 pathways=MetaCyc:PWY-7586,KEGG:ec00520+5.3.1.8,MetaCyc:PWY-882,UniPathway:UPA00126,KEGG:ec00051+5.3.1.8,MetaCyc:PWY-7456,MetaCyc:PWY-5659,MetaCyc:PWY-3861,MetaCyc:PWY-3881 ec=5.3.1.8 id=c104837_g3_i8:945:1401:3:+ def=IPR0012…	90.79	1	1	12	14	47.6787	41.6141	8.48204	4.53115		69.74	88.16	30.92	24.34	0	7	4	1	1		152	17.193	8.88037
c83249_g2_i1:140:367:2:+	len=76 acc=c83249_g2_i1:140:367:2:+ id=c83249_g2_i1:140:367:2:+ interpro_domain=IPR017850 interpro_raw=IPR017849,IPR017850 go=GO:0008152,GO:0003824 def=IPR017850:Alkaline-phosphatase-like, core domain;	90.79	1	2	5	10	8.78723	6.51269	9.78003	9.02972		90.79	23.68	56.58	22.37		2	1	2	1		76	8.64631	5.36377
c110284_g1_i1:38:202:2:+	len=55	90.74	1	2	5	5		8.96674	2.05585		4.6896	0	90.74	38.89	0	79.63		2	1		2	54	6.37115	10.2866
c98754_g1_i1:1:295:3:+	len=97 acc=c98754_g1_i1:1:295:3:+ go=GO:0005515 interpro_raw=IPR002110,IPR020683 id=c98754_g1_i1:1:295:3:+ interpro_domain=IPR020683 def=IPR020683:Ankyrin repeat-containing domain;	90.72	1	1	6	9	29.9541	7.13598		7.64705	23.663	90.72	59.79	0	63.92	82.47	2	1		2	2	97	10.2684	5.08447
c94185_g2_i1:1:391:3:+	len=129 acc=c94185_g2_i1:1:391:3:+ interpro_raw=IPR000873 go=GO:0003824,GO:0008152 interpro_domain=IPR000873 id=c94185_g2_i1:1:391:3:+ def=IPR000873:AMP-dependent synthetase/ligase;	90.7	1	3	7	7	4.24987	15.3588		3.11695	7.31603	48.84	90.7	0	39.53	68.22	1	3		1	2	129	14.7553	4.97021
c99755_g5_i3:1:388:2:+	len=129 acc=c99755_g5_i3:1:388:2:+ go=GO:0000166 interpro_raw=IPR012677 id=c99755_g5_i3:1:388:2:+ interpro_domain=IPR012677 def=IPR012677:Nucleotide-binding alpha-beta plait domain;	90.7	1	2	12	13	7.5864	7.23174	14.3865	2.31777	24.4029	23.26	68.22	82.95	14.73	89.15	1	2	4	1	4	129	13.9528	8.80713
c106325_g1_i4:1:836:1:+	len=278	90.65	1	13	35	43	65.1369	59.0029	24.9696	42.3165	16.6915	67.27	77.34	42.09	77.7	46.76	12	12	5	7	4	278	30.0865	10.0376
CL7745Contig1:187:1914:1:+	len=576 acc=CL7745Contig1:187:1914:1:+ id=CL7745Contig1:187:1914:1:+ interpro_domain=IPR002075,IPR012677 interpro_raw=IPR000504,IPR012677,IPR018222,IPR002075 go=GO:0006810,GO:0005622,GO:0003676,GO:0000166 def=IPR002075:Nuclear transport factor 2; IPR012677:Nucleotide-binding alpha-beta plait domain;	90.61	1	1	63	72	41.1356	99.9451	72.2059	63.6686	42.9454	53.91	56.7	51.3	36.17	38.43	11	17	15	14	8	575	62.8509	6.55127
CL8605Contig1:28:635:1:+	len=202 acc=CL8605Contig1:28:635:1:+ pathways=UniPathway:UPA00245,KEGG:ec00750+4.3.3.6,MetaCyc:PWY-6466 go=GO:0042819,GO:0008152,GO:0003824,GO:0042823 interpro_family=IPR001852 interpro_raw=IPR011060,IPR001852,IPR013785 id=CL8605Contig1:28:635:1:+ interpro_domain=IPR013785 def=IPR001852:Pyridoxal 5'-phosphate synthase subunit PdxS/SNZ; IPR013785:Aldolase-type TIM barrel;	90.59	1	1	32	34	39.2878	44.8435	22.5314	20.4477	83.2579	83.66	76.24	57.43	49.01	59.9	9	8	4	3	9	202	21.6342	6.59521
c96313_g1_i1:1:259:3:+	len=85	90.59	1	1	4	4			10.8905	8.89574	6.64785			85.88	85.88	67.06			1	2	1	85	9.1716	7.91357
c100241_g1_i1:2154:2661:3:+	len=169	90.53	2	2	9	12	19.8219	9.75911	17.0771	11.426	7.46182	43.79	58.58	63.31	57.99	29.59	2	2	2	2	1	169	17.9792	10.4478
c102443_g4_i3:106:900:1:+	len=265 acc=c102443_g4_i3:106:900:1:+ id=c102443_g4_i3:106:900:1:+ interpro_raw=IPR010562 interpro_family=IPR010562 def=IPR010562:Haemolymph juvenile hormone binding;	90.53	2	1	8	8	3.78028	11.2839	5.44204	10.1626		29.55	54.55	21.21	23.86		2	3	2	1		264	30.272	4.50049
c92160_g1_i1:162:449:3:+	len=96 acc=c92160_g1_i1:162:449:3:+ id=c92160_g1_i1:162:449:3:+ interpro_raw=IPR016482,IPR030671 interpro_family=IPR016482 go=GO:0006886,GO:0005784 def=IPR016482:Protein transport protein SecG/Sec61-beta/Sbh;	90.53	1	1	2	2		12.2279			3.1522		90.53	0	0	51.58		1			1	95	9.91014	11.7954
c92068_g1_i2:58:471:1:+	len=138 acc=c92068_g1_i2:58:471:1:+ id=c92068_g1_i2:58:471:1:+ interpro_domain=IPR015947 interpro_raw=IPR002478,IPR016437,IPR015947,IPR004521 go=GO:0003723 interpro_family=IPR016437 def=IPR015947:PUA-like domain; IPR016437:Translation-associated RNA-binding, predicted;	90.51	3	1	18	20	24.3247	15.2035	6.55522	21.1313	22.6452	49.64	86.13	41.61	60.58	86.86	5	5	2	3	3	137	15.2488	8.19189
c95026_g1_i1:1:854:3:+	len=284 acc=c95026_g1_i1:1:854:3:+ go=GO:0030246 interpro_raw=IPR013320,IPR001079 id=c95026_g1_i1:1:854:3:+ interpro_domain=IPR013320 def=IPR013320:Concanavalin A-like lectin/glucanase domain;	90.49	2	2	9	13	10.2125	5.60967	2.47252	13.191	6.85038	59.86	23.94	7.75	42.96	35.21	3	2	1	4	2	284	32.3637	6.23975
c81185_g2_i1:1:381:3:+	len=126 acc=c81185_g2_i1:1:381:3:+ = interpro_raw=IPR023395,IPR018108 id=c81185_g2_i1:1:381:3:+ interpro_domain=IPR023395 def=IPR023395:Mitochondrial carrier domain;	90.48	1	1	10	11	39.4671		21.9963	16.2306	4.96244	90.48	0	66.67	65.87	38.1	4		2	3	1	126	14.2573	9.43701
CL8361Contig1:308:1096:2:+	len=263 acc=CL8361Contig1:308:1096:2:+ interpro_raw=IPR009003,IPR001940 go=GO:0006508,GO:0004252 interpro_family=IPR001940 id=CL8361Contig1:308:1096:2:+ interpro_domain=IPR009003 ec=3.4.21.- def=IPR001940:Peptidase S1C; IPR009003:Trypsin-like cysteine/serine peptidase domain;	90.46	1	2	14	18	41.1749	15.1062	24.2083	3.00744	29.2961	67.94	29.77	18.32	28.63	56.11	5	2	2	2	5	262	28.8118	5.2876
CL3593Contig1:586:2301:1:+	len=572 acc=CL3593Contig1:586:2301:1:+ interpro_raw=IPR020846,IPR011701 go=GO:0016021,GO:0055085 interpro_family=IPR011701 id=CL3593Contig1:586:2301:1:+ interpro_domain=IPR020846 def=IPR011701:Major facilitator superfamily; IPR020846:Major facilitator superfamily domain;	90.37	1	1	79	102	109.862	174.941	96.9717	79.0869	80.2965	71.45	58.49	53.94	63.4	58.67	22	26	13	13	13	571	63.1362	7.97217
c101396_g2_i11:1:685:2:+	len=228 acc=c101396_g2_i11:1:685:2:+ id=c101396_g2_i11:1:685:2:+ interpro_family=IPR007248 go=GO:0016021 interpro_raw=IPR007248 def=IPR007248:Mpv17/PMP22;	90.31	4	1	10	12	3.85457	17.6012	9.8114	5.29363	19.3056	17.62	71.37	25.99	18.06	68.28	1	4	2	1	3	227	26.4159	9.5835
c101569_g2_i3:1:1548:1:+	len=516 acc=c101569_g2_i3:1:1548:1:+ interpro_raw=IPR001606 go=GO:0003677 id=c101569_g2_i3:1:1548:1:+ interpro_domain=IPR001606 def=IPR001606:ARID DNA-binding domain;	90.29	2	1	91	119	72.5945	86.261	132.595	366.66	32.6308	72.23	73.01	65.44	65.24	32.04	12	26	22	33	5	515	54.3533	8.51416
c13330_g1_i1:1:310:1:+	len=103 acc=c13330_g1_i1:1:310:1:+ id=c13330_g1_i1:1:310:1:+ go=GO:0006468,GO:0005524,GO:0004672 interpro_family=IPR016250 interpro_raw=IPR001245,IPR000719,IPR011009 def=IPR016250:Tyrosine-protein kinase, Fes/Fps type;	90.29	1	1	7	7		15.4138	10.2707	8.45459	10.0805	0	82.52	68.93	47.57	78.64		2	2	1	2	103	10.9536	4.53857
c92736_g1_i1:229:570:1:+	len=114 acc=c92736_g1_i1:229:570:1:+ id=c92736_g1_i1:229:570:1:+ interpro_family=IPR029008 go=GO:0072546,GO:0016021,GO:0005783 interpro_raw=IPR008504,IPR029008 def=IPR029008:Rab5-interacting protein family;	90.27	1	1	9	11	13.584	17.7128	6.87872			84.96	90.27	38.94			3	6	1			113	12.4813	9.18799
c101156_g1_i4:31:432:1:+	len=134 acc=c101156_g1_i4:31:432:1:+ interpro_domain=IPR011038 id=c101156_g1_i4:31:432:1:+ interpro_raw=IPR011038,IPR012674 def=IPR011038:Calycin-like;	90.23	1	2	7	7	2.37173	1.94659	20.3216	2.35831		30.08	20.3	90.23	13.53		1	1	4	1		133	14.5205	8.32373
c98482_g1_i1:52:852:1:+	len=267 acc=c98482_g1_i1:52:852:1:+ interpro_raw=IPR002198,IPR016040,IPR002347 interpro_family=IPR002347 go=GO:0008152,GO:0016491 id=c98482_g1_i1:52:852:1:+ ec=1.-.-.- def=IPR002347:Glucose/ribitol dehydrogenase;	90.23	1	1	30	32	19.3269	74.8572	16.3073	21.3848	38.8326	60.53	89.1	39.1	26.69	71.05	5	11	5	4	6	266	28.2087	7.23975
c102235_g4_i1:1:403:3:+	len=133	90.23	1	1	3	5		6.67212	5.2712		12.9511		63.16	36.09		66.17		1	1		2	133	14.9529	8.5874
c109730_g1_i1:35:310:2:+	len=92 acc=c109730_g1_i1:35:310:2:+ ec=3.4.21.- interpro_domain=IPR009003 id=c109730_g1_i1:35:310:2:+ go=GO:0006508,GO:0004252 interpro_raw=IPR001254,IPR009003 def=IPR009003:Trypsin-like cysteine/serine peptidase domain;	90.22	1	4	6	10	5.19465	6.14476	19.433	2.84453	13.5645	20.65	50	83.7	20.65	84.78	1	1	4	1	1	92	10.4234	9.0415
c63513_g1_i1:1:430:2:+	len=143	90.21	1	2	12	13	15.7495	20.4386	7.68405	6.35913	8.59206	50.35	67.83	52.45	22.38	46.15	3	4	2	2	1	143	15.5698	6.04932
c104234_g2_i10:1653:1991:3:+	len=113	90.18	1	1	17	26	16.6352	32.3592	22.8633	9.50558	26.6371	72.32	87.5	77.68	75.89	68.75	3	7	5	3	5	112	12.351	9.99365
c100153_g3_i6:69:1169:3:+	len=367 acc=c100153_g3_i6:69:1169:3:+ interpro_domain=IPR012677 id=c100153_g3_i6:69:1169:3:+ interpro_raw=IPR000504,IPR012677 go=GO:0003676,GO:0000166 def=IPR012677:Nucleotide-binding alpha-beta plait domain;	90.16	3	2	37	63	41.8931	77.609	78.158	58.623	48.7805	67.21	48.91	52.46	53.28	57.92	9	14	10	11	7	366	39.2713	8.66064
CL1171Contig1:277:918:1:+	len=214	90.14	1	10	27	32	24.2995	18.2219	28.737	32.2426	21.3011	69.48	28.17	60.56	68.54	32.86	7	2	9	8	4	213	20.5289	9.37842
c94578_g1_i1:1:430:2:+	len=143 acc=c94578_g1_i1:1:430:2:+ go=GO:0033179,GO:0033177,GO:0015078,GO:0015991 interpro_family=IPR000245 interpro_raw=IPR002379,IPR000245,IPR011555 id=c94578_g1_i1:1:430:2:+ interpro_domain=IPR002379 def=IPR000245:V-ATPase proteolipid subunit; IPR002379:V-ATPase proteolipid subunit C-like domain;	90.14	1	1	15	18	13.516	7.24648	22.1321	23.5009	11.8639	65.49	40.14	69.01	68.31	35.21	4	2	5	5	2	142	14.6637	8.20654
c87643_g1_i1:396:609:3:+	len=71	90.14	1	1	2	2		9.45897			8.95569		90.14			66.2		1			1	71	7.77116	5.23682
c104220_g2_i2:1:519:2:+	len=172	90.12	1	2	22	28	47.2498	7.09343	15.7384	31.5615	21.9914	69.77	34.88	61.05	90.12	71.51	9	3	3	5	3	172	18.7487	6.25244
CL6608Contig1:1:852:1:+	len=284 acc=CL6608Contig1:1:852:1:+ interpro_raw=IPR019372 interpro_family=IPR019372 id=CL6608Contig1:1:852:1:+ def=IPR019372:Lipoma HMGIC fusion partner-like protein;	90.11	3	1	18	25	34.7553	48.0083	3.79334	7.15782	26.4729	66.78	74.2	12.01	14.13	27.21	7	8	1	1	4	283	30.3633	8.26514
c92295_g3_i1:1:275:2:+	len=91 acc=c92295_g3_i1:1:275:2:+ interpro_domain=IPR015943 id=c92295_g3_i1:1:275:2:+ go=GO:0005515 interpro_raw=IPR015943,IPR017986 def=IPR015943:WD40/YVTN repeat-like-containing domain;	90.11	1	1	3	3	5.98336	8.08561				63.74	79.12		0		1	2				91	10.5074	9.36377
c99322_g1_i10:1:276:1:+	len=92	90.11	1	1	16	20	15.8337	2.89753	31.6859	13.6318	12.9722	89.01	25.27	78.02	65.93	71.43	4	1	9	4	2	91	9.35637	5.71924
c100640_g5_i3:179:877:2:+	len=233 acc=c100640_g5_i3:179:877:2:+ id=c100640_g5_i3:179:877:2:+ go=GO:0016559,GO:0005779 interpro_family=IPR008733 interpro_raw=IPR008733,IPR026510 def=IPR008733:Peroxisomal biogenesis factor 11;	90.09	1	2	8	11	16.846	13.159	10.6894		9.96575	66.81	32.33	25.43	0	44.4	4	2	2		2	232	26.369	8.96826
c61725_g2_i1:128:462:2:+	len=111	90.09	1	1	13	13	11.8172	6.96747	41.6231	5.38152	24.3958	54.05	38.74	86.49	53.15	80.18	2	1	5	1	4	111	11.9411	6.11279
c57538_g1_i1:1:394:1:+	len=131 acc=c57538_g1_i1:1:394:1:+ id=c57538_g1_i1:1:394:1:+ interpro_domain=IPR015424 ec=2.6.1.- pathways=KEGG:ec00250+2.6.1.1,MetaCyc:PWY-6643,KEGG:ec00710+2.6.1.1,KEGG:ec00360+2.6.1.1,KEGG:ec00350+2.6.1.1,MetaCyc:PWY-7383,KEGG:ec00401+2.6.1.1,MetaCyc:PWY-7115,KEGG:ec00270+2.6.1.1,MetaCyc:PWY-6638,MetaCyc:PWY-5913,KEGG:ec00330+2.6.1.1,KEGG:ec00400+2.6.1.1,MetaCyc:PWY-6318,KEGG:ec00960+2.6.1.1,M…	90.08	1	1	7	13	7.70796	6.31465	11.9878	2.68464	10.4364	44.27	38.17	80.15	15.27	17.56	1	1	3	1	1	131	15.0288	9.94971
c98981_g4_i4:1:366:1:+	len=122 acc=c98981_g4_i4:1:366:1:+ go=GO:0005515 interpro_raw=IPR002110,IPR020683 id=c98981_g4_i4:1:366:1:+ interpro_domain=IPR020683 def=IPR020683:Ankyrin repeat-containing domain;	90.08	1	0	7	8	10.4137	6.79527			17.7335	43.8	49.59			64.46	1	2			4	121	13.3751	7.04932
CL1122Contig1:97:762:3:-	len=222 acc=CL1122Contig1:97:762:3:- interpro_family=IPR027005 go=GO:0016020 interpro_raw=IPR016093,IPR027005 interpro_domain=IPR016093 id=CL1122Contig1:97:762:3:- def=IPR016093:MIR motif; IPR027005:Glycosyltransferase 39-like;	90.05	1	2	9	10	3.2661	2.95227	6.15812		19.7727	57.01	16.74	44.34	0	51.13	3	1	2		3	221	24.664	7.00537
CL3615Contig1:114:1019:3:+	len=302 acc=CL3615Contig1:114:1019:3:+ id=CL3615Contig1:114:1019:3:+ interpro_domain=IPR023395 = interpro_raw=IPR018108,IPR023395 def=IPR023395:Mitochondrial carrier domain;	90.03	1	7	23	28	31.2056	12.9845	12.8299	14.9643	40.1071	66.11	51.83	20.27	35.22	46.51	6	5	3	4	6	301	33.2741	9.26123
c99840_g1_i6:780:2738:3:+	len=653 acc=c99840_g1_i6:780:2738:3:+ id=c99840_g1_i6:780:2738:3:+ interpro_domain=IPR012677 go=GO:0003676,GO:0000166 interpro_raw=IPR012677,IPR000504 def=IPR012677:Nucleotide-binding alpha-beta plait domain;	90.03	1	10	42	58	49.4735	60.2899	41.4389	74.601	29.1406	40.18	66.26	45.71	43.25	35.74	10	16	8	11	6	652	70.9543	9.11475
c93237_g1_i2:133:345:1:+	len=71 acc=c93237_g1_i2:133:345:1:+ id=c93237_g1_i2:133:345:1:+ interpro_raw=IPR002675 interpro_family=IPR002675 go=GO:0006412,GO:0003735,GO:0005840,GO:0005622 def=IPR002675:Ribosomal protein L38e;	90	3	8	8	28	33.9197		21.3227	105.888		51.43		74.29	51.43	0	2		4	4		70	8.24669	10.1694
CL3727Contig1:954:1617:2:-	len=221 acc=CL3727Contig1:954:1617:2:- interpro_family=IPR006287 interpro_raw=IPR029062,IPR002818,IPR006287 interpro_domain=IPR029062 id=CL3727Contig1:954:1617:2:- def=IPR006287:DJ-1; IPR029062:Class I glutamine amidotransferase-like;	90	1	11	38	42	85.7428	72.3732	32.8027	50.8364	50.9147	67.27	58.18	55.45	88.18	72.27	11	12	4	8	5	220	23.2043	8.99756
CL7115Contig1:1:1085:3:+	len=361 acc=CL7115Contig1:1:1085:3:+ interpro_raw=IPR017853,IPR006102,IPR028369,IPR013781 go=GO:0005975,GO:0046355,GO:0004567,GO:0004553 interpro_family=IPR028369 pathways=UniPathway:UPA00280,KEGG:ec00511+3.2.1.25 id=CL7115Contig1:1:1085:3:+ interpro_domain=IPR006102,IPR017853 ec=3.2.1.25 def=IPR006102:Glycoside hydrolase, family 2, immunoglobulin-like beta-sandwich; IPR017853:Glycoside hydrolase…	90	1	13	23	34	14.739	62.8932	6.79552	17.6772	29.2108	30.56	68.33	8.06	24.72	45.83	3	11	2	3	5	360	40.645	4.80518
CL8461Contig1:58:327:1:+	len=90 acc=CL8461Contig1:58:327:1:+ interpro_raw=IPR004001,IPR004000 interpro_family=IPR004000 id=CL8461Contig1:58:327:1:+ def=IPR004000:Actin family;	90	1	1	2	2		8.04724				0	90		0			2				90	9.67877	5.36377
c110783_g1_i1:46:228:1:+	len=61 acc=c110783_g1_i1:46:228:1:+ ec=3.4.15.- id=c110783_g1_i1:46:228:1:+ interpro_family=IPR001548 go=GO:0016020,GO:0008241,GO:0006508,GO:0008237 interpro_raw=IPR001548 def=IPR001548:Peptidase M2, peptidyl-dipeptidase A;	90	1	1	5	6	5.57276	8.72308				66.67	90				2	3				60	7.05954	5.2876
c80674_g3_i1:70:162:1:+	len=31	90	1	1	1	1	3.05877					90	0				1					30	3.52088	4.4624
c90525_g2_i1:44:1186:2:+	len=381 acc=c90525_g2_i1:44:1186:2:+ interpro_raw=IPR023201,IPR002208 go=GO:0016020,GO:0015031 interpro_family=IPR002208 pathways= id=c90525_g2_i1:44:1186:2:+ interpro_domain=IPR023201 def=IPR002208:SecY/SEC61-alpha family; IPR023201:SecY subunit domain;	90	1	16	20	22	25.4922	18.0167	6.26826	23.6169	72.5499	32.89	35.26	15.79	44.47	68.42	4	2	2	3	11	380	41.3772	8.55811
c98176_g2_i1:2377:2616:1:+	len=80 acc=c98176_g2_i1:2377:2616:1:+ pathways=KEGG:ec00195+3.6.3.14,MetaCyc:PWY-7219,KEGG:ec00190+3.6.3.14 interpro_raw=IPR004100,IPR005294,IPR023366,IPR027417 interpro_family=IPR005294 go=GO:0015986,GO:0046034,GO:0046961,GO:0045261,GO:0046933,GO:0015992 interpro_domain=IPR027417,IPR023366 id=c98176_g2_i1:2377:2616:1:+ def=IPR005294:ATPase, F1 complex, alpha subunit; IPR023366:ATP synthase subun…	90	1	2	7	11	6.40585	8.51418	6.77302	5.72409	6.84419	47.5	77.5	62.5	63.75	67.5	2	3	2	2	2	80	8.19022	4.56396
c98330_g1_i2:171:503:3:+	len=111 acc=c98330_g1_i2:171:503:3:+ interpro_raw=IPR005336 interpro_family=IPR005336 go=GO:0005743,GO:0006850 id=c98330_g1_i2:171:503:3:+ def=IPR005336:Mitochondrial pyruvate carrier;	90	1	1	16	17	30.4944	12.6737		15.0631	34.7018	90	66.36		64.55	80	5	2		3	6	110	12.5407	10.4478
CL1177Contig2:430:581:1:+	len=50	90	1	1	1	1					2.86925		0			90					1	50	5.78477	5.021
CL3720Contig1:1:2281:2:+	len=760 acc=CL3720Contig1:1:2281:2:+ interpro_domain=IPR001747 id=CL3720Contig1:1:2281:2:+ go=GO:0006869,GO:0005319 interpro_raw=IPR001747,IPR015816,IPR015819,IPR011030 pathways= def=IPR001747:Lipid transport protein, N-terminal;	89.99	1	620	628	5437	6957.82	5599.94	6267.79	5791.37	2632.4	75.36	81.03	72.86	72.2	75.89	348	357	357	330	167	759	85.773	7.57666
c105021_g2_i1:3297:4886:3:+	len=530	89.98	1	3	18	19	2.83436	32.6585	21.3822	1.26699	27.332	27.41	28.92	34.22	10.4	39.32	3	4	5	2	5	529	59.509	9.70068
c87899_g1_i1:1:571:2:+	len=190 acc=c87899_g1_i1:1:571:2:+ id=c87899_g1_i1:1:571:2:+ interpro_domain=IPR029065,IPR029017 ec=4.2.1.11 interpro_raw=IPR029017,IPR020810,IPR029065,IPR020811,IPR000941 go=GO:0000015,GO:0004634,GO:0006096,GO:0000287 interpro_family=IPR000941 pathways=MetaCyc:PWY-6142,MetaCyc:PWY-2221,MetaCyc:PWY-5484,MetaCyc:PWY-7218,KEGG:ec00680+4.2.1.11,UniPathway:UPA00109,KEGG:ec00010+4.2.1.11,MetaCyc:PWY-6…	89.95	1	2	8	10	9.93723	5.44974	15.2677	8.60663	11.6206	41.27	38.1	37.04	44.97	45.5	2	1	1	2	2	189	20.0382	5.24951
c95975_g1_i1:323:1546:2:+	len=408 acc=c95975_g1_i1:323:1546:2:+ interpro_raw=IPR001766,IPR011991,IPR018122,IPR018533,IPR013638 go=GO:0006355,GO:0043565,GO:0003700,GO:0019904,GO:0008134 id=c95975_g1_i1:323:1546:2:+ interpro_domain=IPR018533,IPR013638,IPR011991 def=IPR011991:Winged helix-turn-helix DNA-binding domain; IPR013638:Fork-head N-terminal; IPR018533:Forkhead box protein, C-terminal;	89.93	1	1	29	35	35.2618	21.4183	46.4013	19.7151	18.0918	44.96	65.6	45.7	27.03	44.96	6	8	10	4	3	407	45.4493	8.55811
CL9943Contig1:1:771:1:+	len=257 acc=CL9943Contig1:1:771:1:+ ec=1.-.-.- id=CL9943Contig1:1:771:1:+ interpro_family=IPR002347 go=GO:0016491,GO:0008152 interpro_raw=IPR020904,IPR002347,IPR016040,IPR002198 def=IPR002347:Glucose/ribitol dehydrogenase;	89.88	1	3	12	13	19.8885	19.9147	13.9468	4.46934	13.5437	56.42	34.63	28.4	17.12	40.08	4	3	2	1	3	257	27.8648	9.5542
c105556_g2_i1:59:799:2:+	len=247 acc=c105556_g2_i1:59:799:2:+ interpro_raw=IPR009003,IPR001254,IPR001314 interpro_family=IPR001314 go=GO:0006508,GO:0004252 interpro_domain=IPR009003 id=c105556_g2_i1:59:799:2:+ ec=3.4.21.- def=IPR001314:Peptidase S1A, chymotrypsin-type; IPR009003:Trypsin-like cysteine/serine peptidase domain;	89.88	1	1	8	8		3.58817	14.5654	12.8394	18.2204	0	28.34	53.44	34.01	50.61		1	2	2	3	247	26.5939	4.76709
c100095_g1_i2:156:365:3:+	len=70	89.86	2	2	4	10	5.73821		10.5018	11.9494		57.97	0	57.97	75.36	0	1		1	3		69	7.60023	9.90576
c10181_g1_i1:1:209:1:+	len=69 acc=c10181_g1_i1:1:209:1:+ interpro_domain=IPR004100 id=c10181_g1_i1:1:209:1:+ interpro_raw=IPR004100 go=GO:0015992,GO:0046034 pathways=KEGG:ec00195+3.6.3.14,MetaCyc:PWY-7219,KEGG:ec00190+3.6.3.14 def=IPR004100:ATPase, F1 complex alpha/beta subunit, N-terminal domain;	89.86	1	1	5	5	16.5147	6.50441	7.21209			68.12	63.77	78.26	0	0	3	1	1			69	7.46492	4.33545
c103331_g2_i4:125:748:2:+	len=208 acc=c103331_g2_i4:125:748:2:+ id=c103331_g2_i4:125:748:2:+ interpro_family=IPR001152 go=GO:0007015,GO:0003785 interpro_raw=IPR001152 def=IPR001152:Beta-thymosin;	89.86	3	5	19	42	51.9788	30.4404	73.2878	75.5496	11.7496	88.41	57.49	54.11	57	27.54	6	5	7	9	2	207	22.974	6.31592
c99113_g1_i4:1:419:3:+	len=139	89.86	1	1	7	9	14.4974	11.9195			3.66283	58.7	89.86	0		39.86	2	4			1	138	15.9307	7.63525
CL3422Contig1:450:1811:3:+	len=454 acc=CL3422Contig1:450:1811:3:+ interpro_raw=IPR018316,IPR002453,IPR008280,IPR013838,IPR023123,IPR017975,IPR003008,IPR000217 interpro_family=IPR000217 go=GO:0005874,GO:0043234,GO:0005525,GO:0051258,GO:0005200,GO:0007017,GO:0003924 pathways= interpro_domain=IPR023123 id=CL3422Contig1:450:1811:3:+ def=IPR000217:Tubulin; IPR013838:Beta tubulin, autoregulation binding site; IPR023123:Tubulin, …	89.85	2	2	20	28	31.6663	35.7864	20.3866	14.0032	17.1627	36.64	57.62	39.74	29.36	22.96	5	7	4	3	3	453	50.6925	4.91943
c106103_g1_i1:102:281:3:-	len=60	89.83	1	1	1	1		4.56991					89.83	0				1				59	6.50822	4.50049
c104762_g2_i4:1:1006:3:+	len=334 acc=c104762_g2_i4:1:1006:3:+ interpro_raw=IPR003593,IPR027417,IPR003959 go=GO:0005524 interpro_domain=IPR027417,IPR003959 id=c104762_g2_i4:1:1006:3:+ def=IPR003959:ATPase, AAA-type, core; IPR027417:P-loop containing nucleoside triphosphate hydrolase;	89.82	1	2	26	43	85.5638	37.9278	42.0351	40.8386	58.1692	72.16	50	62.87	57.78	74.25	10	5	5	6	8	334	37.3674	8.32373
c103661_g2_i1:700:849:1:+	len=50 acc=c103661_g2_i1:700:849:1:+ interpro_raw=IPR019018 id=c103661_g2_i1:700:849:1:+ interpro_domain=IPR019018 def=IPR019018:Rab-binding domain FIP-RBD;	89.8	1	1	1	1		4.39463					89.8					1				49	5.73394	7.18115
c70513_g1_i1:167:580:2:+	len=138 acc=c70513_g1_i1:167:580:2:+ interpro_raw=IPR025609,IPR010920 id=c70513_g1_i1:167:580:2:+ interpro_domain=IPR010920 def=IPR010920:Like-Sm (LSM) domain;	89.78	1	2	6	6	8.9107	3.43484	5.7739			62.04	41.61	59.85	0		3	1	2			137	15.1826	8.49951
	>sp|K2C1_HUMAN|	89.74	1	48	59	104	73.4544	63.6933	63.6788	43.1878	51.1905	38.88	39.66	44.79	42.77	41.37	16	16	15	13	15	643	65.8469	8.11865
c97643_g1_i1:491:931:2:+	len=147 acc=c97643_g1_i1:491:931:2:+ pathways=MetaCyc:PWY-7187,MetaCyc:PWY-6545,UniPathway:UPA00610,MetaCyc:PWY-7184,MetaCyc:PWY-7206,KEGG:ec00240+3.6.1.23 interpro_raw=IPR008181,IPR008180,IPR029054 interpro_family=IPR008180 go=GO:0016787,GO:0046080,GO:0004170 interpro_domain=IPR029054 id=c97643_g1_i1:491:931:2:+ ec=3.6.1.23 def=IPR008180:Deoxyuridine triphosphate nucleotidohydrolase/Deoxycytidin…	89.73	1	11	11	18	23.0794	12.9671	21.9138	18.5191		43.15	49.32	56.85	47.95		4	3	6	4		146	15.804	6.16357
c104735_g1_i1:1:324:1:+	len=108	89.72	1	2	6	7			12.6373	4.64015	6.36983	0	0	89.72	37.38	23.36			4	1	1	107	12.4037	4.83057
c104799_g1_i3:1:324:1:+	len=108	89.72	1	2	6	8	4.22167		4.38215	1.60733	14.6755	63.55		29.91	11.21	49.53	1		1	1	4	107	11.6379	8.06006
c104807_g1_i7:1:646:3:+	len=214 acc=c104807_g1_i7:1:646:3:+ ec=1.-.-.- id=c104807_g1_i7:1:646:3:+ go=GO:0016491,GO:0008152,GO:0055114 interpro_family=IPR003767 interpro_raw=IPR003767 def=IPR003767:Malate/L-lactate dehydrogenase;	89.72	2	8	26	31	45.3278	28.2956	47.0307	8.83032	23.3637	83.18	67.76	66.36	39.25	70.09	8	7	6	2	5	214	23.1159	9.77393
c99562_g2_i5:242:1147:2:+	len=302 acc=c99562_g2_i5:242:1147:2:+ interpro_raw=IPR023395,IPR018108 = interpro_domain=IPR023395 id=c99562_g2_i5:242:1147:2:+ def=IPR023395:Mitochondrial carrier domain;	89.7	1	2	24	28	42.5594	15.4457	25.7404	19.3286	61.5156	36.21	50.5	34.22	45.85	67.77	6	4	4	3	8	301	33.3011	9.51025
c101133_g1_i1:129:1673:3:+	len=515 acc=c101133_g1_i1:129:1673:3:+ interpro_raw=IPR011701,IPR020846 interpro_family=IPR011701 go=GO:0016021,GO:0055085 interpro_domain=IPR020846 id=c101133_g1_i1:129:1673:3:+ def=IPR011701:Major facilitator superfamily; IPR020846:Major facilitator superfamily domain;	89.69	2	2	36	40	23.8723	61.4125	37.1474	8.83382	48.4017	47.86	74.71	54.28	26.65	49.22	6	13	6	4	8	514	56.8769	8.89502
c92093_g1_i2:152:532:2:+	len=127 acc=c92093_g1_i2:152:532:2:+ interpro_raw=IPR027310,IPR005455 go=GO:0003779 interpro_family=IPR005455 id=c92093_g1_i2:152:532:2:+ def=IPR005455:Profilin; IPR027310:Profilin conserved site;	89.68	2	25	27	55	68.2526	45.2962	31.7338	55.466	18.7701	70.63	82.54	52.38	77.78	34.92	8	8	7	12	3	126	13.7771	7.23975
c88943_g2_i1:1:557:3:+	len=185 acc=c88943_g2_i1:1:557:3:+ interpro_domain=IPR000980 id=c88943_g2_i1:1:557:3:+ interpro_raw=IPR000980 def=IPR000980:SH2 domain;	89.67	1	2	7	8	12.3067	10.2157	3.60493	6.57078		46.2	77.17	26.63	35.87	0	1	4	1	2		184	20.6515	8.33838
c104316_g4_i2:33:470:3:+	len=146 acc=c104316_g4_i2:33:470:3:+ interpro_domain=IPR029058 id=c104316_g4_i2:33:470:3:+ go=GO:0006508,GO:0008236 interpro_raw=IPR001375,IPR029058 def=IPR029058:Alpha/Beta hydrolase fold;	89.66	2	2	5	6	17.9242		4.9068	4.06122		61.38		48.97	24.83		3		1	1		145	16.8273	6.04932
c98482_g1_i2:1:523:2:+	len=174 acc=c98482_g1_i2:1:523:2:+ pathways=KEGG:ec00982+1.1.1.1,MetaCyc:PWY-5751,MetaCyc:PWY-6028,MetaCyc:PWY-5480,MetaCyc:PWY-5057,MetaCyc:PWY-6802,MetaCyc:PWY-6342,MetaCyc:PWY-5076,KEGG:ec00010+1.1.1.1,KEGG:ec00350+1.1.1.1,KEGG:ec00592+1.1.1.1,KEGG:ec00626+1.1.1.1,KEGG:ec00980+1.1.1.1,MetaCyc:PWY-3162,MetaCyc:PWY-7118,MetaCyc:PWY-6587,KEGG:ec00830+1.1.1.1,MetaCyc:PWY-5078,MetaCyc:PWY-5082,Meta…	89.6	1	1	24	26	19.3269	46.7923	10.2915	21.3848	35.2514	59.54	49.13	30.64	41.04	80.92	4	7	4	4	6	173	18.6637	7.44482
CL8662Contig1:1:1067:2:+	len=355 acc=CL8662Contig1:1:1067:2:+ interpro_domain=IPR020683 id=CL8662Contig1:1:1067:2:+ go=GO:0005515 interpro_raw=IPR002110,IPR020683 def=IPR020683:Ankyrin repeat-containing domain;	89.58	1	2	20	21	43.3097	11.263	23.868	17.63	44.4871	50.99	29.3	27.04	37.46	47.04	6	3	2	2	7	355	37.3906	4.90674
c102067_g3_i9:1:548:1:+	len=182 acc=c102067_g3_i9:1:548:1:+ pathways= go=GO:0005488,GO:0008601,GO:0007165,GO:0000159 interpro_family=IPR002554 interpro_raw=IPR016024,IPR002554 id=c102067_g3_i9:1:548:1:+ interpro_domain=IPR016024 def=IPR002554:Protein phosphatase 2A, regulatory B subunit, B56; IPR016024:Armadillo-type fold;	89.56	1	3	18	23	47.9303	31.4149	2.34414	4.72577	19.7069	70.88	65.93	42.86	36.26	67.03	8	4	2	2	4	182	20.5137	9.65674
c65654_g1_i1:1:259:2:+	len=86	89.53	1	1	3	4		4.37232	8.39		6.20707		37.21	87.21		62.79		1	1		1	86	9.94701	7.32764
c101517_g2_i1:111:483:3:+	len=124 acc=c101517_g2_i1:111:483:3:+ ec=1.-.-.- id=c101517_g2_i1:111:483:3:+ go=GO:0016491,GO:0008152 interpro_family=IPR002347 interpro_raw=IPR002347,IPR002198,IPR016040 def=IPR002347:Glucose/ribitol dehydrogenase;	89.52	2	1	4	5	6.02969		11.2647	8.37688		45.16	0	33.87	89.52	0	1		1	2		124	13.4243	9.27588
c102534_g2_i2:117:516:3:+	len=133 acc=c102534_g2_i2:117:516:3:+ interpro_raw=IPR001388 go=GO:0016021,GO:0016192 id=c102534_g2_i2:117:516:3:+ interpro_domain=IPR001388 def=IPR001388:Synaptobrevin;	89.47	1	2	8	9		8.91283	5.90788	3.05177	4.87563	0	52.63	46.62	18.05	49.62		2	3	1	3	133	14.5936	5.57959
c61184_g1_i1:1:345:3:+	len=114	89.47	1	42	66	91	113.414	74.8794	80.1115	47.7016	151.629	79.82	78.95	86.84	81.58	87.72	17	16	15	8	22	114	11.4079	9.56885
c75588_g1_i1:1:345:3:+	len=114 acc=c75588_g1_i1:1:345:3:+ go=GO:0000166 interpro_raw=IPR023299 interpro_domain=IPR023299 id=c75588_g1_i1:1:345:3:+ def=IPR023299:P-type ATPase, cytoplasmic domain N;	89.47	1	1	5	5	5.77517	9.01082	11.2811	10.0469		67.54	64.04	48.25	68.42	0	1	1	2	1		114	12.7517	9.39307
CL7062Contig1:185:1582:2:+	len=466 acc=CL7062Contig1:185:1582:2:+ interpro_domain=IPR008948,IPR024083 id=CL7062Contig1:185:1582:2:+ ec=4.2.1.2 pathways=MetaCyc:PWY-5392,MetaCyc:PWY-6728,MetaCyc:PWY-6969,KEGG:ec00620+4.2.1.2,UniPathway:UPA00223,MetaCyc:PWY-561,MetaCyc:PWY-7254,KEGG:ec00720+4.2.1.2,MetaCyc:PWY-7384,MetaCyc:PWY-5913,MetaCyc:PWY-5690,KEGG:ec00020+4.2.1.2 interpro_raw=IPR024083,IPR005677,IPR008948,IPR022761,IPR…	89.46	1	1	25	31	54.4005	28.8823	33.2057	8.49258	63.8152	63.87	33.55	42.15	15.7	64.09	9	5	5	2	9	465	50.4045	6.60986
c103432_g1_i6:693:1348:3:+	len=218	89.45	1	3	12	18	5.93861	9.97565	4.46095	13.4342	13.5571	46.33	55.5	30.28	49.08	36.24	2	3	1	3	4	218	24.1442	5.2876
c99676_g2_i7:307:675:1:+	len=123	89.43	1	4	16	17	50.2291	25.9631	24.3956	8.15649	3.39514	89.43	73.98	80.49	40.65	29.27	7	4	3	2	1	123	13.0655	5.66846
c102895_g1_i6:712:1110:1:+	len=133 acc=c102895_g1_i6:712:1110:1:+ id=c102895_g1_i6:712:1110:1:+ ec=1.-.-.- interpro_raw=IPR016040,IPR002198 interpro_family=IPR002198 go=GO:0008152,GO:0016491 def=IPR002198:Short-chain dehydrogenase/reductase SDR;	89.39	2	1	7	14	10.9905	11.788		15.3959	8.69906	65.91	58.33		63.64	68.94	3	3		2	3	132	14.9647	9.11475
c98393_g1_i1:147:686:3:+	len=180 acc=c98393_g1_i1:147:686:3:+ interpro_raw=IPR007204 interpro_family=IPR007204 go=GO:0005856,GO:0005885,GO:0030833,GO:0034314 id=c98393_g1_i1:147:686:3:+ def=IPR007204:Actin-related protein 2/3 complex subunit 3;	89.39	2	5	6	8	4.87731	8.58452	3.84524		9.14309	34.64	32.4	14.53	0	34.08	2	3	1		1	179	20.4695	8.74854
CL7784Contig1:1:202:2:+	len=67	89.39	1	1	1	2		7.79788					89.39			0		1				66	7.47079	8.17725
c103683_g1_i1:1:1215:3:+	len=404	89.36	1	15	61	75	58.6002	133.095	55.2932	45.7077	16.7948	47.77	76.49	47.28	41.58	19.31	17	26	10	10	4	404	43.7185	11.5903
c95165_g1_i4:1:426:1:+	len=142	89.36	1	4	12	16	10.1313	19.829	3.56764	23.4339	13.357	25.53	53.19	16.31	83.69	46.81	2	2	1	5	3	141	15.9474	10.4771
c96101_g1_i1:42:551:3:+	len=170 acc=c96101_g1_i1:42:551:3:+ id=c96101_g1_i1:42:551:3:+ go=GO:0031032,GO:0005515,GO:0003779 interpro_family=IPR003096 interpro_raw=IPR003096,IPR001715,IPR001997,IPR000557 def=IPR003096:Smooth muscle protein/calponin;	89.35	1	5	10	11	8.44216	23.2419		15.2595	28.3708	46.15	81.07	0	43.2	88.76	2	3		2	4	169	18.9946	8.44092
c56268_g1_i1:1:368:2:+	len=122 acc=c56268_g1_i1:1:368:2:+ id=c56268_g1_i1:1:368:2:+ interpro_raw=IPR004125,IPR004780 interpro_family=IPR004780 go=GO:0005525,GO:0048500,GO:0006614,GO:0003924,GO:0008312 def=IPR004780:Signal recognition particle protein Ffh;	89.34	1	1	6	10	4.22577	11.1735	10.0919	3.15904	6.95256	22.95	59.84	54.92	20.49	43.44	1	3	2	1	1	122	13.8733	10.0815
c100099_g1_i1:137:589:2:+	len=151 acc=c100099_g1_i1:137:589:2:+ interpro_domain=IPR011992 id=c100099_g1_i1:137:589:2:+ interpro_family=IPR012008 go=GO:0005509 interpro_raw=IPR018247,IPR002048,IPR011992 def=IPR011992:EF-hand domain pair; IPR012008:Serine/threonine-protein phosphatase with EF-hands;	89.33	1	1	6	7	3.33614	19.1621			3.13685	87.33	50.67			32.67	3	3			1	150	16.8917	4.18311
c100873_g1_i5:1:1352:3:+	len=450 acc=c100873_g1_i5:1:1352:3:+ interpro_domain=IPR011993,IPR014885 id=c100873_g1_i5:1:1352:3:+ interpro_raw=IPR014885,IPR011993,IPR000697 pathways= def=IPR011993:Pleckstrin homology-like domain; IPR014885:VASP tetramerisation;	89.31	4	75	91	115	53.3234	128.45	68.4171	86.112	58.3126	62.36	65.03	49.22	49	48.11	16	31	16	20	15	449	49.0087	9.68604
c88963_g1_i2:135:473:3:+	len=113 acc=c88963_g1_i2:135:473:3:+ id=c88963_g1_i2:135:473:3:+ interpro_raw=IPR027534,IPR001859 interpro_family=IPR027534 go=GO:0006414,GO:0006412,GO:0005622,GO:0005840,GO:0003735 def=IPR027534:Ribosomal protein L12 family;	89.29	1	26	38	48	50.1523	46.6188	15.5925	20.6551	63.1632	66.96	54.46	60.71	79.46	88.39	12	7	6	4	14	112	11.4378	4.32275
c94236_g2_i1:199:453:1:+	len=85	89.29	1	1	4	7		22.9376	4.6252		3.96351		89.29	50		44.05		3	1		1	84	9.5706	5.41455
CL7726Contig1:187:1863:1:+	len=559 acc=CL7726Contig1:187:1863:1:+ interpro_raw=IPR000504,IPR018222,IPR012677,IPR002075 go=GO:0006810,GO:0005622,GO:0003676,GO:0000166 interpro_domain=IPR012677,IPR002075 id=CL7726Contig1:187:1863:1:+ def=IPR002075:Nuclear transport factor 2; IPR012677:Nucleotide-binding alpha-beta plait domain;	89.25	1	1	51	59	31.3829	66.7568	43.1072	45.5522	48.8327	52.69	54.3	48.39	27.78	46.59	9	13	11	10	9	558	61.1021	6.90283
CL4971Contig1:414:1334:3:+	len=307 acc=CL4971Contig1:414:1334:3:+ id=CL4971Contig1:414:1334:3:+ interpro_domain=IPR029055 ec=3.-.-.- interpro_raw=IPR029055,IPR000246 go=GO:0016787 interpro_family=IPR000246 def=IPR000246:Peptidase T2, asparaginase 2; IPR029055:Nucleophile aminohydrolases, N-terminal;	89.22	1	2	60	68	83.1191	95.0059	50.5772	64.4126	81.4214	68.3	51.63	49.35	71.57	58.82	13	14	10	11	14	306	31.5991	6.1001
c102802_g2_i2:221:526:2:+	len=102 acc=c102802_g2_i2:221:526:2:+ id=c102802_g2_i2:221:526:2:+ interpro_domain=IPR003034 interpro_raw=IPR003034 def=IPR003034:SAP domain;	89.22	1	2	7	7	15.5057		17.7337			50.98		82.35			3		4			102	11.4311	10.9458
c104059_g1_i1:1:504:1:+	len=168 acc=c104059_g1_i1:1:504:1:+ interpro_raw=IPR009071 id=c104059_g1_i1:1:504:1:+ interpro_domain=IPR009071 def=IPR009071:High mobility group box domain;	89.22	1	1	5	5	3.48103	3.49439	3.4689		11.2586	20.36	14.37	36.53		86.83	1	1	1		2	167	19.5326	9.70068
c101355_g1_i5:141:671:3:+	len=177 acc=c101355_g1_i5:141:671:3:+ id=c101355_g1_i5:141:671:3:+ interpro_family=IPR000618 go=GO:0042302 interpro_raw=IPR000618 def=IPR000618:Insect cuticle protein;	89.2	3	8	8	14	5.41822	8.12471	3.70175	1.46023	5.82311	7.95	56.82	7.95	7.39	56.25	3	3	2	1	4	176	19.4416	4.50049
c110135_g1_i1:36:257:3:+	len=74 acc=c110135_g1_i1:36:257:3:+ id=c110135_g1_i1:36:257:3:+ interpro_domain=IPR023621 go=GO:0005622,GO:0003735,GO:0005840,GO:0006412 interpro_family=IPR000054 interpro_raw=IPR023621,IPR000054 def=IPR000054:Ribosomal protein L31e; IPR023621:Ribosomal protein L31e domain;	89.19	1	2	2	2	2.93022					89.19	0	0	0	0	2					74	8.62883	10.3892
c99587_g1_i2:98:790:2:+	len=231 acc=c99587_g1_i2:98:790:2:+ id=c99587_g1_i2:98:790:2:+ interpro_family=IPR000175 go=GO:0006836,GO:0016021,GO:0005328 interpro_raw=IPR000175 def=IPR000175:Sodium:neurotransmitter symporter;	89.18	2	3	20	21	12.9555	34.0146	16.1737	8.58117	15.7349	37.66	54.98	53.25	18.61	46.75	3	8	3	2	5	231	25.7557	5.64307
c87216_g3_i1:1:361:2:+	len=120 acc=c87216_g3_i1:1:361:2:+ go=GO:0005515 interpro_raw=IPR015943,IPR024977,IPR017986 id=c87216_g3_i1:1:361:2:+ interpro_domain=IPR024977,IPR015943 def=IPR015943:WD40/YVTN repeat-like-containing domain; IPR024977:Anaphase-promoting complex subunit 4, WD40 domain;	89.17	1	2	4	5	8.69801	8.95741	4.4351			40	88.33	37.5			2	2	1			120	13.4296	8.44092
c95799_g1_i2:50:523:2:+	len=158 acc=c95799_g1_i2:50:523:2:+ id=c95799_g1_i2:50:523:2:+ interpro_domain=IPR020568 go=GO:0006412,GO:0005840,GO:0003735 interpro_family=IPR000754 interpro_raw=IPR020568,IPR000754,IPR014721,IPR020574 def=IPR000754:Ribosomal protein S9; IPR020568:Ribosomal protein S5 domain 2-type fold;	89.17	3	5	8	16			16.4225	34.5438	15.8428	0	0	26.75	51.59	53.5			2	5	2	157	17.8047	10.1548
CL9198Contig1:1:252:1:+	len=84 acc=CL9198Contig1:1:252:1:+ interpro_domain=IPR011598 id=CL9198Contig1:1:252:1:+ interpro_raw=IPR011598 go=GO:0046983 def=IPR011598:Myc-type, basic helix-loop-helix (bHLH) domain;	89.16	1	2	5	7	2.83562	10.0039			23.1906	43.37	79.52			74.7	1	2			3	83	9.52708	9.99365
CL262Contig1:2499:3026:1:-	len=176 acc=CL262Contig1:2499:3026:1:- interpro_raw=IPR026896 id=CL262Contig1:2499:3026:1:- interpro_domain=IPR026896 def=IPR026896:Transcription termination and cleavage factor C-terminal domain;	89.14	4	2	17	20	11.4362	9.09092	41.6881		5.99567	66.86	32.57	89.14	0	21.71	4	2	9		2	175	19.1346	9.51025
c104723_g8_i1:1:141:1:+	len=47 acc=c104723_g8_i1:1:141:1:+ go=GO:0046872,GO:0003676 interpro_raw=IPR015880,IPR007087,IPR013087 interpro_domain=IPR013087 id=c104723_g8_i1:1:141:1:+ def=IPR013087:Zinc finger C2H2-type/integrase DNA-binding domain;	89.13	1	1	1	1		2.70929					89.13					1				46	5.76595	9.80322
c60904_g1_i1:1:303:1:+	len=101 acc=c60904_g1_i1:1:303:1:+ interpro_raw=IPR011527 go=GO:0055085,GO:0006810,GO:0042626,GO:0005524,GO:0016021 interpro_domain=IPR011527 id=c60904_g1_i1:1:303:1:+ def=IPR011527:ABC transporter type 1, transmembrane domain;	89.11	1	2	7	8	17.3043	3.29997		12.0934	12.1243	50.5	27.72	0	82.18	60.4	3	1		2	2	101	11.2151	9.37842
c100708_g1_i2:133:299:1:+	len=55	89.09	1	6	8	8	4.08153	3.13381	11.8437	4.63486	4.18594	58.18	38.18	89.09	43.64	38.18	1	1	2	2	2	55	5.79689	7.1665
c105809_g1_i2:1:1462:2:+	len=487 acc=c105809_g1_i2:1:1462:2:+ id=c105809_g1_i2:1:1462:2:+ pathways= go=GO:0055085,GO:0016021,GO:0008272,GO:0008271,GO:0015116,GO:0016020 interpro_family=IPR001902 interpro_raw=IPR001902,IPR011547,IPR002645 def=IPR001902:Sulphate anion transporter;	89.09	1	15	33	43	52.3256	38.2875	32.2912		38.481	49.18	58.85	52.88	0	48.56	10	8	9		10	486	52.8219	8.29443
c73720_g1_i1:1:387:3:+	len=128	89.06	1	2	13	14	16.3315	17.8501	3.292	7.97785	5.02388	60.94	75.78	28.91	48.44	32.81	4	6	1	2	1	128	13.516	6.30322
c107453_g1_i1:1:249:2:+	len=82 acc=c107453_g1_i1:1:249:2:+ interpro_domain=IPR000477 id=c107453_g1_i1:1:249:2:+ interpro_raw=IPR000477 def=IPR000477:Reverse transcriptase domain;	89.02	1	1	5	5	4.69765	7.56603		1.34634	4.32261	73.17	89.02	0	14.63	58.54	1	2		1	1	82	8.91946	6.66846
c102329_g1_i5:284:912:2:+	len=209	89	1	3	5	6	7.14619		7.01461	3.08586		53.11	0	44.5	9.57	0	2		2	1		209	22.8101	4.67822
CL3979Contig1:1:384:1:+	len=128	88.98	1	1	7	8	12.6862	1.55633	9.41761	4.76376		58.27	9.45	64.57	34.65	0	3	1	3	1		127	13.2617	8.19189
c103381_g1_i1:97:1047:1:+	len=317 acc=c103381_g1_i1:97:1047:1:+ interpro_domain=IPR029154 id=c103381_g1_i1:97:1047:1:+ ec=1.1.1.44,1.1.1.31 interpro_raw=IPR006115,IPR029154,IPR015815,IPR008927,IPR011548,IPR016040,IPR013328 interpro_family=IPR022694,IPR015815 go=GO:0016491,GO:0051287,GO:0008442,GO:0004616,GO:0055114 pathways=KEGG:ec00280+1.1.1.31,UniPathway:UPA00362 def=IPR015815:3-hydroxyisobutyrate dehydrogenase-related;…	88.92	1	27	45	51	61.8462	100.806	22.2262	40.6726	36.7676	75	49.37	43.04	51.9	43.67	15	14	4	10	5	316	32.9821	8.57275
c105868_g1_i1:1199:4771:2:+	len=1191 acc=c105868_g1_i1:1199:4771:2:+ go=GO:0005581,GO:0005201 interpro_raw=IPR008160,IPR000885 = interpro_domain=IPR000885 id=c105868_g1_i1:1199:4771:2:+ def=IPR000885:Fibrillar collagen, C-terminal;	88.91	1	903	993	1298	1375.02	1711.43	1065.24	1068.33	1564.43	75.63	74.2	63.87	78.91	82.77	236	279	194	181	249	1190	118.829	8.96826
CL2385Contig1:176:583:2:+	len=136	88.89	1	3	6	8	7.06267	3.97087	5.78027	14.4108	9.41371	57.04	16.3	22.96	54.07	35.56	1	1	1	2	2	135	14.5064	9.75928
CL2626Contig1:1252:1955:1:+	len=234 acc=CL2626Contig1:1252:1955:1:+ interpro_raw=IPR008962 interpro_domain=IPR008962 id=CL2626Contig1:1252:1955:1:+ def=IPR008962:PapD-like;	88.89	1	1	12	12	23.0988	6.61357	20.0614	6.92966	22.7498	50.85	14.1	49.57	26.92	50	3	1	4	2	2	234	26.2267	9.5542
CL2732Contig1:213:458:3:+	len=82	88.89	1	1	3	4	4.15913		9.87376			37.04	0	88.89			1		2			81	9.35545	5.99854
c102016_g2_i2:1:410:3:+	len=136 acc=c102016_g2_i2:1:410:3:+ pathways= interpro_family=IPR001128 go=GO:0005506,GO:0016705,GO:0020037,GO:0055114 interpro_raw=IPR002401,IPR001128,IPR017972 ec=1.14.-.- id=c102016_g2_i2:1:410:3:+ def=IPR001128:Cytochrome P450;	88.89	1	2	7	7	19.6296	6.82814	4.0567			77.78	38.52	34.07		0	4	2	1			135	15.6562	9.34912
c105146_g1_i1:1:244:1:+	len=81	88.89	1	1	3	4	9.01635		11.5536	3.10397		79.01		88.89	23.46		1		2	1		81	9.11868	11.2534
c67106_g1_i2:1:328:3:+	len=108 acc=c67106_g1_i2:1:328:3:+ interpro_domain=IPR026015 id=c67106_g1_i2:1:328:3:+ interpro_family=IPR000711 go=GO:0016020,GO:0015986,GO:0046933 interpro_raw=IPR020781,IPR000711,IPR026015 def=IPR000711:ATPase, OSCP/delta subunit; IPR026015:F1F0 ATP synthase OSCP/delta subunit, N-terminal domain;	88.89	2	1	4	7	3.14922	3.00419		6.78924	6.6916	32.41	88.89	0	24.07	24.07	1	2		1	1	108	12.3216	9.5835
c105733_g1_i2:2386:5271:1:+	len=962 acc=c105733_g1_i2:2386:5271:1:+ id=c105733_g1_i2:2386:5271:1:+ interpro_family=IPR006407 go=GO:0005515 interpro_raw=IPR001298,IPR014756,IPR013783,IPR017868 def=IPR006407:1,4-alpha-glucan-branching enzyme, GlgB;	88.87	2	56	97	110	217.097	135.389	123.461	52.8897	123.91	69.41	57.54	55.78	30.28	45.68	31	18	22	10	18	961	103.29	7.59131
CL3030Contig1:1:1214:3:+	len=404 acc=CL3030Contig1:1:1214:3:+ id=CL3030Contig1:1:1214:3:+ interpro_domain=IPR029048,IPR029047 interpro_raw=IPR029048,IPR013126,IPR029047 interpro_family=IPR013126 def=IPR013126:Heat shock protein 70 family; IPR029047:Heat shock protein 70kD, peptide-binding domain; IPR029048:Heat shock protein 70kD, C-terminal domain;	88.83	1	1	35	44	50.8268	43.3847	23.3369	31.6423	43.4839	66.25	72.21	36.48	48.14	56.82	10	10	5	7	6	403	44.365	6.66846
c101069_g1_i2:284:1495:2:+	len=404 acc=c101069_g1_i2:284:1495:2:+ ec=3.4.21.- interpro_domain=IPR009003 id=c101069_g1_i2:284:1495:2:+ interpro_family=IPR001940 go=GO:0005515,GO:0004252,GO:0006508 interpro_raw=IPR001940,IPR009003,IPR001478 def=IPR001940:Peptidase S1C; IPR009003:Trypsin-like cysteine/serine peptidase domain;	88.83	1	19	76	86	195.155	114.283	71.2946	50.4226	110.838	74.94	60.79	69.48	53.85	71.96	26	19	13	7	15	403	43.8702	9.46631
c75184_g2_i1:1:512:1:+	len=170 acc=c75184_g2_i1:1:512:1:+ go=GO:0005524 interpro_raw=IPR000330 interpro_domain=IPR000330 id=c75184_g2_i1:1:512:1:+ def=IPR000330:SNF2-related;	88.82	1	2	4	4	5.07043	3.28395	3.16931		5.09001	18.82	23.53	20	0	48.24	1	1	1		1	170	19.4442	9.53955
c99560_g2_i2:305:1834:2:+	len=510 acc=c99560_g2_i2:305:1834:2:+ interpro_family=IPR011701 go=GO:0016021,GO:0055085 interpro_raw=IPR011701,IPR020846 interpro_domain=IPR020846 id=c99560_g2_i2:305:1834:2:+ def=IPR011701:Major facilitator superfamily; IPR020846:Major facilitator superfamily domain;	88.8	1	2	69	90	130.841	109.305	61.7511	66.2941	108.824	69.94	57.96	49.9	60.12	69.16	23	18	9	10	17	509	56.1616	6.58057
c79945_g1_i1:1:351:1:+	len=117 acc=c79945_g1_i1:1:351:1:+ go=GO:0003341,GO:0003777,GO:0016887,GO:0005858,GO:0030286,GO:0007018 interpro_family=IPR026983 interpro_raw=IPR026983,IPR026979,IPR004273 ec=3.6.1.3 id=c79945_g1_i1:1:351:1:+ interpro_domain=IPR004273 def=IPR004273:Dynein heavy chain domain; IPR026983:Dynein heavy chain;	88.79	1	1	5	6	13.7266	9.93003	11.4633			88.79	58.62	56.9	0		3	1	2			116	13.422	9.36377
c70229_g1_i1:1:270:3:+	len=89	88.76	1	1	1	1	13.4543					88.76					1					89	10.3714	8.41162
c88649_g1_i1:112:753:1:+	len=214 acc=c88649_g1_i1:112:753:1:+ interpro_domain=IPR027417 id=c88649_g1_i1:112:753:1:+ pathways= interpro_family=IPR001806,IPR002041 go=GO:0007264,GO:0005622,GO:0006913,GO:0003924,GO:0005525,GO:0015031,GO:0007165,GO:0006886,GO:0016020 interpro_raw=IPR027417,IPR020849,IPR003578,IPR005225,IPR001806,IPR003579,IPR002041 def=IPR001806:Small GTPase superfamily; IPR002041:Ran GTPase; IPR027417:P-loo…	88.73	1	9	13	14	11.9964	26.7397	2.38617	7.83667	4.95625	67.61	69.95	6.1	35.21	16.9	5	4	1	2	1	213	23.5188	6.39209
c100653_g1_i5:617:1735:2:+	len=373 acc=c100653_g1_i5:617:1735:2:+ go=GO:0005515 interpro_raw=IPR017986,IPR001680,IPR015943 interpro_domain=IPR015943 id=c100653_g1_i5:617:1735:2:+ def=IPR015943:WD40/YVTN repeat-like-containing domain;	88.71	3	2	17	18	10.3636	16.2781	6.4016	8.4396	33.1246	25.27	51.61	26.08	13.17	59.41	2	4	2	2	7	372	40.8471	7.12256
c80552_g1_i1:231:602:3:+	len=124 acc=c80552_g1_i1:231:602:3:+ interpro_domain=IPR011009 id=c80552_g1_i1:231:602:3:+ interpro_raw=IPR011009,IPR000719 go=GO:0004672,GO:0005524,GO:0006468 def=IPR011009:Protein kinase-like domain;	88.71	1	1	5	6	9.7742	15.6671		3.56072		74.19	57.26	0	19.35		3	1		1		124	14.1924	8.11865
c93170_g1_i3:1895:2083:2:-	len=63	88.71	1	1	1	1					7.13948	0				88.71					1	62	7.41998	9.62744
c103793_g2_i5:165:1016:3:+	len=284	88.69	2	2	20	22	8.86278	14.9847	18.8703	36.5366	37.5888	34.28	30.39	48.41	54.06	42.4	3	2	4	6	5	283	31.689	5.96045
c89503_g1_i1:1:482:3:+	len=160	88.68	1	7	8	8	15.2362	5.37294	7.98062	5.11951		72.33	32.7	31.45	16.35		4	1	2	1		159	18.1806	9.5835
c89349_g1_i1:90:803:3:+	len=238 acc=c89349_g1_i1:90:803:3:+ id=c89349_g1_i1:90:803:3:+ interpro_family=IPR001107 go=GO:0016020 interpro_raw=IPR001972,IPR001107 def=IPR001107:Band 7 protein;	88.66	2	6	13	17	7.29539	9.49797	28.1917		39.7165	20.17	54.2	47.06	0	63.03	1	3	5		4	238	26.3574	6.30322
c99451_g1_i3:1:268:2:+	len=89 acc=c99451_g1_i3:1:268:2:+ interpro_raw=IPR029358 interpro_family=IPR029358 id=c99451_g1_i3:1:268:2:+ def=IPR029358:Protein of unknown function DUF4586;	88.64	1	2	4	4	9.75312	3.25274				61.36	81.82	0	0		2	2				88	9.57365	9.61279
c97372_g5_i1:1:373:3:+	len=123	88.62	1	1	9	12	20.7122	4.46267	16.0827	24.5292	10.8683	43.9	31.71	77.24	75.61	59.35	2	1	2	3	1	123	13.3849	10.3306
c98924_g1_i2:183:686:3:+	len=168 acc=c98924_g1_i2:183:686:3:+ interpro_raw=IPR008253,IPR016579 go=GO:0016020 interpro_family=IPR016579 id=c98924_g1_i2:183:686:3:+ interpro_domain=IPR008253 def=IPR008253:Marvel domain; IPR016579:Synaptogyrin;	88.62	1	6	9	9		20.0676		20.4794		0	80.84	0	35.93	0		5		3		167	18.3679	8.14795
c85833_g1_i1:1:950:2:+	len=316	88.61	1	15	28	38	9.97078	23.6386	50.9126	63.9093	7.31608	38.29	79.75	65.19	70.89	43.99	3	7	9	11	3	316	33.2102	9.64209
CL1420Contig1:1952:2191:2:-	len=80 acc=CL1420Contig1:1952:2191:2:- go=GO:0019079,GO:0043154,GO:0005737,GO:0043066 interpro_family=IPR024135 interpro_raw=IPR024135 id=CL1420Contig1:1952:2191:2:- def=IPR024135:Hepatitis B X-interacting protein;	88.61	2	2	6	6		12.0873	10.4383				88.61	78.48				3	3			79	8.2772	7.88428
c105076_g1_i10:151:837:1:+	len=229	88.6	1	6	14	16	16.1166	18.4039	9.33441	6.59629		42.98	42.54	30.26	30.26	0	5	4	3	3		228	24.6864	10.6675
CL7995Contig1:307:1095:1:+	len=263 acc=CL7995Contig1:307:1095:1:+ interpro_raw=IPR019734,IPR011990,IPR013026 = go=GO:0005515 interpro_domain=IPR011990 id=CL7995Contig1:307:1095:1:+ def=IPR011990:Tetratricopeptide-like helical domain;	88.59	3	4	9	11	17.7393	19.728		11.093	21.7258	38.4	61.98		42.59	49.05	3	3		2	3	263	29.4279	6.1001
c91569_g1_i1:1:555:2:+	len=184 acc=c91569_g1_i1:1:555:2:+ id=c91569_g1_i1:1:555:2:+ interpro_raw=IPR001873 go=GO:0006814,GO:0005272,GO:0016020 interpro_family=IPR001873 def=IPR001873:Na+ channel, amiloride-sensitive;	88.59	1	5	6	7	6.49916	2.77703		10.8283		53.8	23.91	0	51.09	0	2	1		3		184	21.1672	6.65381
c100910_g2_i1:1:318:2:+	len=105 acc=c100910_g2_i1:1:318:2:+ interpro_family=IPR013126 interpro_raw=IPR013126 id=c100910_g2_i1:1:318:2:+ def=IPR013126:Heat shock protein 70 family;	88.57	1	1	6	7	6.24847	3.05748	3.21036	12.0089	2.8718	36.19	15.24	42.86	73.33	60	2	1	1	2	1	105	11.439	8.90967
c101443_g1_i8:1:213:3:+	len=70 acc=c101443_g1_i8:1:213:3:+ id=c101443_g1_i8:1:213:3:+ interpro_raw=IPR030217 interpro_family=IPR030217 def=IPR030217:Nuclear RNA export factor;	88.57	1	3	3	4	2.75503		1.5022	6.58856		71.43	0	20	27.14		1		1	1		70	7.66891	8.03076
c94473_g1_i1:1:327:1 / Q27270.1	Tenecin-3	88.54	2	69	86	324	99.1326	153.145	718.916	1482	35.0841	88.54	88.54	88.54	88.54	88.54	9	8	43	63	3	96	9.28942	7.85498
CL2883Contig1:1:1126:2:+	len=375 acc=CL2883Contig1:1:1126:2:+ interpro_raw=IPR003409 = id=CL2883Contig1:1:1126:2:+ def=IPR003409:MORN motif;	88.5	1	2	23	26	19.4924	33.3212	35.6456	11.7709	12.797	25.4	59.63	44.92	31.55	16.58	5	7	9	2	2	374	40.6277	5.13525
c103501_g1_i3:206:1930:2:+	len=575 acc=c103501_g1_i3:206:1930:2:+ pathways=MetaCyc:PWY-2221,MetaCyc:PWY-6142,KEGG:ec00620+2.7.1.40,MetaCyc:PWY-7218,MetaCyc:PWY-5484,UniPathway:UPA00109,MetaCyc:PWY-6901,MetaCyc:PWY-5723,MetaCyc:PWY-6886,MetaCyc:PWY-1042,KEGG:ec00230+2.7.1.40,KEGG:ec00010+2.7.1.40,MetaCyc:PWY-7383,MetaCyc:PWY-7003 go=GO:0003824,GO:0030955,GO:0000287,GO:0006096,GO:0004743 interpro_family=IPR001697 interpro_ra…	88.5	3	39	65	92	136.284	95.9046	94.0324	70.9947	226.169	62.89	66.03	60.45	58.19	67.07	18	14	13	10	24	574	61.677	8.20654
CL6206Contig1:1:577:3:+	len=191	88.48	1	2	7	7	9.83038	3.42694	8.60065		7.05411	36.13	29.32	56.54	0	62.83	1	2	2		2	191	21.9785	9.71533
CL7445Contig1:468:1640:3:+	len=391 acc=CL7445Contig1:468:1640:3:+ interpro_family=IPR017446 interpro_raw=IPR008949,IPR017446 interpro_domain=IPR008949 id=CL7445Contig1:468:1640:3:+ def=IPR008949:Isoprenoid synthase domain; IPR017446:Polyprenyl synthetase-related;	88.46	1	1	30	33	70.8645	32.0044	26.1865	2.91763	73.2188	59.74	66.41	44.87	20	44.36	10	6	4	2	8	390	42.8532	6.46826
c101729_g1_i5:2196:2664:3:+	len=156	88.46	2	3	12	15	25.0267	8.50288	15.5293		30.2525	67.31	33.33	65.38	0	88.46	4	2	3		5	156	16.1506	4.95752
c103476_g1_i5:99:257:3:+	len=53	88.46	1	1	3	5	2.50749	3.28116		4.92638	2.70473	61.54	88.46		88.46	40.38	1	2		1	1	52	6.00731	11.3706
c79157_g1_i1:20:565:2:+	len=182 acc=c79157_g1_i1:20:565:2:+ pathways=KEGG:ec00030+1.1.1.44,UniPathway:UPA00115,KEGG:ec00480+1.1.1.44 go=GO:0016491,GO:0050661,GO:0004616,GO:0055114,GO:0006098 interpro_family=IPR022694,IPR006183 interpro_raw=IPR013328,IPR016040,IPR006114,IPR008927,IPR006183,IPR006115 ec=1.1.1.44 id=c79157_g1_i1:20:565:2:+ interpro_domain=IPR006114 def=IPR006114:6-phosphogluconate dehydrogenase, C-terminal…	88.46	1	13	22	32	22.0713	48.8428	27.3544	3.82194	17.8507	56.04	65.38	86.26	21.43	65.93	5	7	7	1	5	182	19.755	5.60498
c96814_g1_i1:1520:1678:2:+	len=53	88.46	1	3	4	4		6.67929		9.8359			50		80.77	0		2		2		52	5.16468	10.0083
c104502_g2_i3:233:934:2:+	len=234 acc=c104502_g2_i3:233:934:2:+ interpro_raw=IPR012423 interpro_family=IPR012423 go=GO:0043189,GO:0005634,GO:0006355 id=c104502_g2_i3:233:934:2:+ def=IPR012423:Chromatin modification-related protein Eaf7/MRGBP;	88.41	1	2	16	18	24.4768	4.16855	12.0968	21.5396	36.1747	54.94	16.74	30.9	58.37	48.5	4	1	3	5	4	233	26.2845	9.40771
c106271_g1_i1:54:262:3:+	len=69	88.41	1	2	3	4	3.47125	6.00375				28.99	88.41				1	3				69	7.91015	8.67529
c31027_g1_i1:1:209:3:+	len=69 acc=c31027_g1_i1:1:209:3:+ ec=2.1.1.- interpro_domain=IPR029063 id=c31027_g1_i1:1:209:3:+ interpro_family=IPR000692 go=GO:0008168,GO:0006364,GO:0003723,GO:0008033 interpro_raw=IPR029063,IPR000692 def=IPR000692:Fibrillarin; IPR029063:S-adenosyl-L-methionine-dependent methyltransferase;	88.41	1	1	4	7	5.03311		10.1515	7.38924	5.36606	55.07		79.71	50.72	55.07	1		2	1	1	69	7.86717	9.45166
c85154_g1_i1:1:207:1:+	len=69 acc=c85154_g1_i1:1:207:1:+ id=c85154_g1_i1:1:207:1:+ interpro_family=IPR000109 go=GO:0016020,GO:0005215,GO:0006810 interpro_raw=IPR000109 pathways= def=IPR000109:Proton-dependent oligopeptide transporter family;	88.41	1	1	3	3	6.24705				11.4005	84.06	0			73.91	1				2	69	7.6459	6.37939
c94075_g1_i1:1:494:1:+	len=164 acc=c94075_g1_i1:1:494:1:+ id=c94075_g1_i1:1:494:1:+ interpro_domain=IPR011330 ec=3.2.1.24 interpro_raw=IPR000602,IPR027291,IPR011330 go=GO:0005975,GO:0003824,GO:0004559 def=IPR011330:Glycoside hydrolase/deacetylase, beta/alpha-barrel;	88.41	1	1	4	4		10.6561			17.0009	0	26.83	0		61.59		2			2	164	18.6919	4.55127
CL5922Contig1:788:1540:2:+	len=251 acc=CL5922Contig1:788:1540:2:+ interpro_domain=IPR000922 id=CL5922Contig1:788:1540:2:+ interpro_raw=IPR000922 go=GO:0030246 def=IPR000922:D-galactoside/L-rhamnose binding SUEL lectin domain;	88.4	1	1	6	6	15.135	5.73077		8.07005		47.6	30.8	0	53.6		2	2		2		250	28.2724	6.12549
c104520_g1_i2:114:581:3:+	len=156 acc=c104520_g1_i2:114:581:3:+ go=GO:0016616,GO:0004450,GO:0055114,GO:0051287,GO:0000287,GO:0006102 interpro_family=IPR004790 interpro_raw=IPR019818,IPR004790,IPR024084 pathways=MetaCyc:PWY-7268,MetaCyc:PWY-5913,MetaCyc:PWY-6728,KEGG:ec00480+1.1.1.42,MetaCyc:PWY-6969,KEGG:ec00720+1.1.1.42,MetaCyc:PWY-7254,MetaCyc:PWY-6549,KEGG:ec00020+1.1.1.42,MetaCyc:PWY-7124 ec=1.1.1.42 id=c104520_g1_i2:…	88.39	1	2	18	23	51.7013	39.3421	2.63744	15.0469	8.16095	81.94	85.16	18.06	29.03	48.39	10	5	1	2	2	155	16.9214	6.68311
c100874_g1_i1:413:1525:2:+	len=371 acc=c100874_g1_i1:413:1525:2:+ id=c100874_g1_i1:413:1525:2:+ interpro_domain=IPR020843,IPR016040 ec=1.-.-.- interpro_raw=IPR011032,IPR016040,IPR013149,IPR002085 go=GO:0016491,GO:0008270,GO:0055114 interpro_family=IPR002085 def=IPR002085:Alcohol dehydrogenase superfamily, zinc-type; IPR016040:NAD(P)-binding domain; IPR020843:Polyketide synthase, enoylreductase domain;	88.38	1	24	60	73	142.044	106.901	30.7885	41.7709	99.9925	65.68	63.24	29.19	54.05	25.41	21	18	6	7	15	370	40.5644	5.87158
c90424_g4_i1:1:133:2:+	len=44	88.37	1	1	1	1				6.74724					88.37					1		43	4.7912	4.22119
c101304_g2_i1:120:1820:3:+	len=567 acc=c101304_g2_i1:120:1820:3:+ go=GO:0006457,GO:0042026,GO:0005737,GO:0005524 interpro_family=IPR002423 interpro_raw=IPR001844,IPR002423,IPR018370,IPR027409,IPR027413 id=c101304_g2_i1:120:1820:3:+ interpro_domain=IPR027409,IPR027413 def=IPR002423:Chaperonin Cpn60/TCP-1 family; IPR027409:GroEL-like apical domain; IPR027413:GroEL-like equatorial domain;	88.34	2	66	73	94	116.566	113.599	49.1465	95.5927	211.489	54.59	40.11	31.45	43.11	27.39	17	16	10	15	24	566	60.2928	5.73193
c97351_g1_i2:314:1315:2:+	len=334 acc=c97351_g1_i2:314:1315:2:+ id=c97351_g1_i2:314:1315:2:+ interpro_raw=IPR007271,IPR004689,IPR021189 go=GO:0008643,GO:0005338,GO:0005351,GO:0015780,GO:0000139,GO:0016021 interpro_family=IPR004689,IPR007271 pathways= def=IPR004689:UDP-galactose transporter; IPR007271:Nucleotide-sugar transporter;	88.29	2	1	28	32	44.0912	32.1208	34.4085	6.79498	37.0826	68.77	26.73	48.95	29.43	54.05	10	5	6	2	6	333	36.5073	8.82178
c105715_g1_i2:2037:2473:3:+	len=145 acc=c105715_g1_i2:2037:2473:3:+ interpro_domain=IPR013087 id=c105715_g1_i2:2037:2473:3:+ interpro_raw=IPR013087,IPR007087 go=GO:0003676,GO:0046872 def=IPR013087:Zinc finger C2H2-type/integrase DNA-binding domain;	88.28	1	6	9	10	9.32687	13.5605		21.4175	14.4446	51.03	53.1	0	71.03	62.76	2	2		4	2	145	15.7871	9.46631
c99007_g1_i2:24:1202:3:+	len=393 acc=c99007_g1_i2:24:1202:3:+ interpro_family=IPR000215 go=GO:0005615 interpro_raw=IPR000215,IPR023796,IPR023795 interpro_domain=IPR023796 id=c99007_g1_i2:24:1202:3:+ def=IPR000215:Serpin family; IPR023795:Serpin, conserved site; IPR023796:Serpin domain;	88.27	2	3	21	22	26.5521	25.9129	7.94902	28.081	18.1696	33.42	61.48	16.07	47.96	41.84	4	6	2	5	4	392	43.3835	5.63037
c99141_g1_i2:1:972:1:+	len=324 acc=c99141_g1_i2:1:972:1:+ interpro_raw=IPR000449,IPR029071,IPR015496,IPR000626,IPR015940,IPR009060 interpro_family=IPR015496 go=GO:0005515 interpro_domain=IPR029071,IPR009060 id=c99141_g1_i2:1:972:1:+ def=IPR009060:UBA-like; IPR015496:Ubiquilin; IPR029071:Ubiquitin-related domain;	88.24	3	1	24	30	23.5796	13.5995	23.3873	53.6531	40.8431	60.06	38.39	48.61	62.54	65.02	5	2	7	10	5	323	34.6414	5.26221
c98654_g1_i2:142:984:1:+	len=281	88.21	1	2	31	31	43.7899	55.9199	16.8532	32.5409	22.1789	59.64	82.5	32.14	75.71	61.07	7	9	3	7	5	280	30.4241	9.90576
CL7243Contig1:84:569:3:+	len=162 acc=CL7243Contig1:84:569:3:+ interpro_raw=IPR004087,IPR004088 go=GO:0003723,GO:0003676 interpro_domain=IPR004087 id=CL7243Contig1:84:569:3:+ def=IPR004087:K Homology domain;	88.2	1	1	16	21		9.55054	18.4964	39.8465	4.82345	0	40.37	49.07	65.22	39.75		3	4	9	1	161	16.8453	9.86182
CL2912Contig1:218:1361:2:+	len=381 acc=CL2912Contig1:218:1361:2:+ id=CL2912Contig1:218:1361:2:+ interpro_domain=IPR015919 go=GO:0005509,GO:0007155,GO:0007156,GO:0005886,GO:0016020 interpro_raw=IPR002126,IPR020894,IPR015919 def=IPR015919:Cadherin-like;	88.19	1	6	11	15	20.8148	9.77777	11.1333	28.3561		37.27	37.53	29.4	44.88		3	3	3	4		381	41.5629	4.62744
c109280_g1_i1:63:497:3:+	len=145 acc=c109280_g1_i1:63:497:3:+ id=c109280_g1_i1:63:497:3:+ go=GO:0005634,GO:0003677,GO:0000786,GO:0046982 interpro_family=IPR021171 interpro_raw=IPR007125,IPR009072,IPR002119 def=IPR021171:Core histone macro-H2A;	88.19	1	1	6	6	4.03321	11.939		2.67441	5.83456	43.75	57.64	0	13.89	27.78	2	2		1	1	144	14.9561	10.1841
CL3112Contig1:2144:2374:1:-	len=77	88.16	2	3	15	16	21.1006	9.9917	14.0616	9.58963	11.5705	84.21	73.68	63.16	60.53	67.11	5	2	3	2	3	76	8.42931	9.40771
c101448_g1_i1:1:738:1:+	len=246 acc=c101448_g1_i1:1:738:1:+ id=c101448_g1_i1:1:738:1:+ interpro_domain=IPR015943 go=GO:0005515 interpro_raw=IPR001680,IPR019775,IPR015943,IPR017986 def=IPR015943:WD40/YVTN repeat-like-containing domain;	88.16	1	1	16	16	56.7172	23.5236	6.59478	17.4591	11.0249	49.39	50.2	30.61	32.65	40.41	6	4	1	3	2	245	27.1744	8.73389
c95473_g1_i1:65:295:2:+	len=77	88.16	1	1	3	3	5.21483				4.90932	88.16				46.05	2				1	76	8.63227	10.4185
CL32Contig2:3770:4732:2:-	len=321 acc=CL32Contig2:3770:4732:2:- id=CL32Contig2:3770:4732:2:- interpro_raw=IPR015943,IPR020472,IPR019775,IPR001680,IPR017986 go=GO:0005515 interpro_family=IPR016346 def=IPR016346:Guanine nucleotide-binding protein, beta subunit;	88.13	1	2	15	18	22.9619	14.4899	10.9111	14.9532	17.5631	60	35.94	24.38	30.63	39.38	4	3	2	3	4	320	36.0515	5.78271
CL5666Contig1:1:509:3:+	len=169	88.1	1	6	13	14		23.0854	3.08098	17.5851	21.978	0	59.52	20.83	34.52	72.62		4	1	4	5	168	17.5618	4.04346
c97030_g1_i1:82:966:1:+	len=295	88.1	1	5	11	16	42.5659	17.2615	12.5171		13.0978	52.38	24.15	58.16	0	35.71	5	3	3		2	294	33.0088	6.04932
c88583_g2_i1:285:412:3:+	len=42	88.1	1	1	1	1					4.46596					88.1					1	42	5.10473	9.92041
c57476_g2_i1:99:425:3:+	len=109 acc=c57476_g2_i1:99:425:3:+ interpro_raw=IPR001060,IPR031160 interpro_domain=IPR001060,IPR031160 id=c57476_g2_i1:99:425:3:+ def=IPR001060:FCH domain; IPR031160:F-BAR domain;	88.07	1	1	3	4		11.1573	5.84365	5.04524			70.64	35.78	77.98			1	1	1		109	12.6442	4.80518
CL3065Contig1:313:993:1:+	len=227 acc=CL3065Contig1:313:993:1:+ interpro_domain=IPR027417 id=CL3065Contig1:313:993:1:+ ec=2.7.4.3 pathways=KEGG:ec00230+2.7.4.10,MetaCyc:PWY-7219,UniPathway:UPA00588,KEGG:ec00230+2.7.4.3 interpro_raw=IPR007862,IPR000850,IPR028586,IPR006259,IPR027417 interpro_family=IPR000850 go=GO:0016776,GO:0005524,GO:0006139,GO:0019205,GO:0005739,GO:0004017 def=IPR000850:Adenylate kinase/UMP-CMP kinase; I…	88.05	1	2	7	15	25.055	38.6025	17.6292	12.1478	23.7227	40.71	34.51	53.1	53.1	34.07	3	2	3	2	2	226	25.8396	8.80713
c33225_g1_i1:1:481:3:+	len=159 acc=c33225_g1_i1:1:481:3:+ interpro_raw=IPR005828,IPR003663,IPR020846 interpro_family=IPR005828 go=GO:0022857,GO:0055085,GO:0016020,GO:0016021,GO:0022891 pathways= interpro_domain=IPR020846 id=c33225_g1_i1:1:481:3:+ def=IPR005828:General substrate transporter; IPR020846:Major facilitator superfamily domain;	88.05	1	2	25	28	20.7398	40.87	18.4356	4.07479	41.9098	61.64	86.16	71.7	49.69	57.23	5	9	4	1	6	159	17.3591	8.29443
c62579_g2_i1:1:277:2:+	len=92 acc=c62579_g2_i1:1:277:2:+ id=c62579_g2_i1:1:277:2:+ interpro_domain=IPR015943 interpro_raw=IPR017986,IPR001680,IPR019775,IPR015943 go=GO:0005515 def=IPR015943:WD40/YVTN repeat-like-containing domain;	88.04	1	1	4	4		6.67757	1.58235		3.34374	0	60.87	83.7		42.39		1	2		1	92	9.54079	6.26514
c107026_g1_i1:1:428:2:+	len=142 acc=c107026_g1_i1:1:428:2:+ id=c107026_g1_i1:1:428:2:+ interpro_family=IPR013126 interpro_raw=IPR013126,IPR018181 def=IPR013126:Heat shock protein 70 family;	88.03	1	2	8	9	18.928		8.95862	10.2795		82.39		35.92	40.14		4		3	2		142	15.6192	9.05615
c98754_g6_i1:1:1207:3:+	len=401 acc=c98754_g6_i1:1:1207:3:+ interpro_raw=IPR002110,IPR020683 go=GO:0005515 interpro_domain=IPR020683 id=c98754_g6_i1:1:1207:3:+ def=IPR020683:Ankyrin repeat-containing domain;	88.03	1	2	30	32	60.8767	23.3203	11.4287	49.8291	93.3039	38.9	47.38	30.17	29.18	73.57	8	5	3	5	10	401	43.4166	6.80029
c106115_g1_i2:490:814:1:+	len=108	87.96	1	9	20	22	45.1134	7.32895	23.5984		42.8238	87.96	44.44	83.33		60.19	7	2	5		7	108	11.6611	9.81787
c87295_g1_i1:111:435:3:+	len=108 acc=c87295_g1_i1:111:435:3:+ interpro_raw=IPR000719,IPR011009 go=GO:0006468,GO:0005524,GO:0004672 interpro_domain=IPR011009 id=c87295_g1_i1:111:435:3:+ def=IPR011009:Protein kinase-like domain;	87.96	1	2	5	6	5.49148	8.88913	7.15875		16.8985	39.81	57.41	49.07		66.67	1	1	1		2	108	12.0381	9.31982
CL2089Contig1:80:580:3:-	len=167 acc=CL2089Contig1:80:580:3:- id=CL2089Contig1:80:580:3:- interpro_family=IPR003397 interpro_raw=IPR003397 def=IPR003397:Mitochondrial inner membrane translocase subunit Tim17/Tim22/Tim23/peroxisomal protein PMP24;	87.95	2	9	14	14	4.3697	15.4142	9.62031	3.91515	9.06608	53.01	60.24	27.71	30.72	43.37	3	4	4	2	1	166	17.646	7.86963
c33791_g1_i1:1:249:1:+	len=83	87.95	1	1	1	1					6.97458				0	87.95					1	83	9.51219	10.4478
c102352_g2_i1:6:1400:3:+	len=465 acc=c102352_g2_i1:6:1400:3:+ id=c102352_g2_i1:6:1400:3:+ interpro_domain=IPR015424 ec=4.-.-.- interpro_raw=IPR015422,IPR015421,IPR015424,IPR001597 go=GO:0003824,GO:0006520,GO:0016829 def=IPR015424:Pyridoxal phosphate-dependent transferase;	87.93	2	5	26	32	32.4214	15.4144	7.90509	37.1399	30.2746	65.52	23.49	14.66	61.64	56.9	7	5	2	8	6	464	51.9852	8.49951
CL1698Contig1:1061:1609:1:-	len=183 acc=CL1698Contig1:1061:1609:1:- go=GO:0005525,GO:0015031,GO:0007264,GO:0005622,GO:0006886 interpro_family=IPR006689,IPR003579 interpro_raw=IPR006689,IPR003579,IPR005225,IPR006687,IPR024156,IPR027417 id=CL1698Contig1:1061:1609:1:- interpro_domain=IPR027417 def=IPR003579:Small GTPase superfamily, Rab type; IPR006689:Small GTPase superfamily, ARF/SAR type; IPR027417:P-loop containing nucleos…	87.91	1	2	6	6	13.1037	3.37857	5.85798	7.52617		56.04	12.64	31.32	37.91		2	1	2	1		182	20.6326	6.58057
c95634_g1_i1:1:993:1:+	len=331	87.88	1	37	55	62	38.0953	68.2592	50.0442	76.682	53.4352	37.58	53.64	63.64	56.06	52.42	8	14	11	15	10	330	33.9219	7.79639
c99608_g1_i4:39:239:3:+	len=67 acc=c99608_g1_i4:39:239:3:+ interpro_domain=IPR029058 id=c99608_g1_i4:39:239:3:+ interpro_raw=IPR029058 def=IPR029058:Alpha/Beta hydrolase fold;	87.88	1	1	4	4			6.8078	3.05614	10.6898			74.24	42.42	84.85			1	1	2	66	7.24567	7.41553
c102021_g2_i1:239:661:2:+	len=141	87.86	1	7	14	16	15.3688	17.3029	33.0694	12.4399	13.214	35.71	52.86	49.29	35.71	71.43	3	3	5	2	3	140	15.3343	8.47021
c105240_g2_i1:1:1241:3:+	len=413 acc=c105240_g2_i1:1:1241:3:+ pathways=MetaCyc:PWY-7111,MetaCyc:PWY-7396,MetaCyc:PWY-5486,MetaCyc:PWY-6333,MetaCyc:PWY-7557,MetaCyc:PWY-5079,MetaCyc:PWY-5082,MetaCyc:PWY-5078,KEGG:ec00830+1.1.1.1,MetaCyc:PWY-6313,KEGG:ec00680+1.1.1.284,MetaCyc:PWY-6871,KEGG:ec00260+1.1.1.1,MetaCyc:PWY-7013,KEGG:ec00071+1.1.1.1,KEGG:ec00625+1.1.1.1,MetaCyc:PWY-6802,MetaCyc:PWY-5480,MetaCyc:PWY-5057,MetaCyc:…	87.86	1	33	37	74	119.346	79.6802	43.5073	10.5591	25.853	52.18	63.59	50	15.05	41.75	17	15	8	3	6	412	44.1516	8.06006
c104062_g2_i2:129:872:3:+	len=248 acc=c104062_g2_i2:129:872:3:+ interpro_raw=IPR002198,IPR020904,IPR002347,IPR016040 interpro_family=IPR002347 go=GO:0016491,GO:0008152 id=c104062_g2_i2:129:872:3:+ ec=1.-.-.- def=IPR002347:Glucose/ribitol dehydrogenase;	87.85	2	10	45	61	73.7752	67.4255	41.8504	8.90726	142.677	77.33	59.51	71.26	22.67	76.92	11	11	9	2	18	247	26.0257	9.51025
c85830_g1_i1:231:553:3:+	len=107 acc=c85830_g1_i1:231:553:3:+ ec=6.1.1.20 id=c85830_g1_i1:231:553:3:+ interpro_domain=IPR010978 go=GO:0005737,GO:0004826,GO:0000166,GO:0005524,GO:0006432 interpro_raw=IPR004188,IPR010978 pathways=KEGG:ec00970+6.1.1.20 def=IPR010978:tRNA-binding arm;	87.85	1	1	5	6	3.79151			9.79569		22.43			79.44		1			4		107	12.3486	9.23193
c91614_g1_i1:1:766:2:+	len=255 acc=c91614_g1_i1:1:766:2:+ id=c91614_g1_i1:1:766:2:+ interpro_raw=IPR015937,IPR015931,IPR001030,IPR015932,IPR015934 go=GO:0008152 interpro_family=IPR015937 pathways=UniPathway:UPA00223,KEGG:ec00290+4.2.1.33,UniPathway:UPA00048,KEGG:ec00630+4.2.1.3,KEGG:ec00720+4.2.1.3,KEGG:ec00020+4.2.1.3 def=IPR015937:Aconitase/isopropylmalate dehydratase;	87.84	1	1	26	29	61.9015	39.7439	4.42886	19.8762	27.0497	79.22	50.2	32.55	30.98	61.96	9	6	2	4	7	255	27.8264	5.50342
c97041_g1_i3:1:272:2:+	len=90 acc=c97041_g1_i3:1:272:2:+ id=c97041_g1_i3:1:272:2:+ interpro_domain=IPR012336 interpro_raw=IPR004045,IPR012336 go=GO:0005515 def=IPR012336:Thioredoxin-like fold;	87.78	1	1	5	5	4.20649	14.0761			4.75317	70	86.67	0		57.78	1	3			1	90	9.87695	5.36377
c98982_g1_i1:1:1395:1:+	len=465	87.72	1	87	103	180	338.208	119.454	133.864	186.574	287.668	41.16	59.91	44.4	44.18	84.7	39	16	20	22	37	464	47.1817	6.87354
c100837_g4_i1:44:460:2:+	len=139 acc=c100837_g4_i1:44:460:2:+ interpro_raw=IPR001849,IPR000648,IPR011993 interpro_family=IPR000648 interpro_domain=IPR011993 id=c100837_g4_i1:44:460:2:+ def=IPR000648:Oxysterol-binding protein; IPR011993:Pleckstrin homology-like domain;	87.68	2	1	5	5	5.19522			3.97485	9.70014	19.57	0		40.58	86.96	1			1	3	138	15.4465	7.92822
c89732_g1_i1:1:221:2:+	len=73 acc=c89732_g1_i1:1:221:2:+ ec=3.5.1.28 id=c89732_g1_i1:1:221:2:+ interpro_domain=IPR002502 go=GO:0008270,GO:0008745,GO:0009253 interpro_family=IPR015510 interpro_raw=IPR002502,IPR015510,IPR006619 def=IPR002502:N-acetylmuramoyl-L-alanine amidase domain; IPR015510:Peptidoglycan recognition protein;	87.67	1	8	8	14	27.4662	20.1964	13.697	9.20153		78.08	54.79	73.97	46.58		3	3	3	2		73	8.06792	8.01611
c95857_g1_i1:1:708:1:+	len=236	87.66	1	1	11	12	22.5278	5.7139	27.9632	11.3401	4.95507	51.06	26.38	74.04	33.19	16.6	4	1	3	3	1	235	25.8949	5.69385
c98296_g1_i2:1:318:2:+	len=105 acc=c98296_g1_i2:1:318:2:+ interpro_raw=IPR011527 go=GO:0005524,GO:0016021,GO:0006810,GO:0042626,GO:0055085 id=c98296_g1_i2:1:318:2:+ interpro_domain=IPR011527 def=IPR011527:ABC transporter type 1, transmembrane domain;	87.62	1	9	22	24	35.1804	46.1058	18.2768	15.6228	9.01587	85.71	82.86	67.62	61.9	68.57	5	9	4	3	2	105	11.565	9.59814
c100129_g1_i1:263:1426:2:+	len=388 acc=c100129_g1_i1:263:1426:2:+ go=GO:0055114,GO:0019752,GO:0030060,GO:0005975,GO:0016616,GO:0016615,GO:0016491,GO:0006108,GO:0003824 interpro_family=IPR001557 interpro_raw=IPR001557,IPR016040,IPR001236,IPR011274,IPR015955,IPR001252,IPR022383,IPR010945 pathways=MetaCyc:PWY-7383,MetaCyc:PWY-1622,MetaCyc:PWY-6969,KEGG:ec00270+1.1.1.37,KEGG:ec00720+1.1.1.37,KEGG:ec00020+1.1.1.37,KEGG:ec00710+…	87.6	1	2	58	79	89.3253	90.2501	50.591	65.3346	181.942	52.2	69.25	43.67	53.23	71.83	12	12	7	10	20	387	42.2127	9.05615
c98772_g4_i1:198:586:3:+	len=129 acc=c98772_g4_i1:198:586:3:+ id=c98772_g4_i1:198:586:3:+ interpro_domain=IPR005135 interpro_raw=IPR005135 def=IPR005135:Endonuclease/exonuclease/phosphatase;	87.6	1	1	5	6	10.1793		6.35833	5.68063	11.5177	72.87	0	62.79	79.07	65.89	2		1	2	1	129	14.9329	9.70068
c102839_g3_i2:1:415:2:+	len=138	87.59	1	1	6	7	16.7235	7.00129		5.30203	8.08151	37.96	63.5		29.93	43.8	3	2		1	1	137	15.9009	7.04932
c105201_g2_i3:183:1536:3:+	len=451 acc=c105201_g2_i3:183:1536:3:+ interpro_domain=IPR011527,IPR027417 id=c105201_g2_i3:183:1536:3:+ interpro_raw=IPR027417,IPR011527,IPR030260 interpro_family=IPR030260 go=GO:0016021,GO:0005524,GO:0042626,GO:0005743,GO:0006810,GO:0055085 def=IPR011527:ABC transporter type 1, transmembrane domain; IPR027417:P-loop containing nucleoside triphosphate hydrolase; IPR030260:ATP-binding cassette su…	87.58	2	1	35	46	44.774	37.3475	49.0347	28.1469	62.8613	47.23	56.1	32.59	38.8	58.09	8	10	8	3	10	451	48.7738	7.91357
CL2020Contig1:564:1071:3:+	len=169	87.57	1	4	6	7	5.47447	17.096	6.93019			14.2	87.57	44.38		0	2	3	2			169	17.2832	5.47803
c103331_g2_i6:125:634:2:+	len=170 acc=c103331_g2_i6:125:634:2:+ id=c103331_g2_i6:125:634:2:+ interpro_family=IPR001152 go=GO:0007015,GO:0003785 interpro_raw=IPR001152 def=IPR001152:Beta-thymosin;	87.57	3	0	14	28	38.4557	21.0839	40.8323	40.0529	11.7496	76.33	75.15	26.63	36.69	33.73	4	5	5	5	2	169	18.6768	6.22705
c92625_g1_i1:856:1531:1:+	len=225 acc=c92625_g1_i1:856:1531:1:+ interpro_family=IPR013350 go=GO:0004748,GO:0005524,GO:0055114,GO:0006260 interpro_raw=IPR008926,IPR013554,IPR000788,IPR013509 pathways=MetaCyc:PWY-7227,MetaCyc:PWY-6545,UniPathway:UPA00326,KEGG:ec00480+1.17.4.1,MetaCyc:PWY-7198,MetaCyc:PWY-7222,MetaCyc:PWY-7184,MetaCyc:PWY-7220,KEGG:ec00240+1.17.4.1,MetaCyc:PWY-7226,MetaCyc:PWY-7210,KEGG:ec00230+1.17.4.1 ec=1…	87.56	1	4	8	9	5.38644	10.8147			8.35444	28.89	42.22	0		54.67	1	3			4	225	25.9244	7.78174
c42494_g1_i1:1:290:1:+	len=96 acc=c42494_g1_i1:1:290:1:+ id=c42494_g1_i1:1:290:1:+ go=GO:0005549,GO:0016020,GO:0007608,GO:0004984 interpro_family=IPR004117 interpro_raw=IPR004117 def=IPR004117:Olfactory receptor, Drosophila;	87.5	1	1	7	8	16.42	7.07583	5.89811		5.83515	82.29	51.04	37.5		44.79	4	1	1		1	96	10.8929	9.83252
c63782_g1_i1:1:532:3:+	len=176 acc=c63782_g1_i1:1:532:3:+ id=c63782_g1_i1:1:532:3:+ interpro_family=IPR001807 go=GO:0005247,GO:0055085,GO:0016020,GO:0006821,GO:0005216 interpro_raw=IPR014743,IPR001807 def=IPR001807:Chloride channel, voltage gated;	87.5	1	3	10	10	10.3197	2.98999		17.3707	18.219	76.7	17.61	0	30.68	57.39	3	1		4	2	176	18.864	8.44092
c76842_g1_i1:1:265:2:+	len=88 acc=c76842_g1_i1:1:265:2:+ interpro_raw=IPR009003 interpro_domain=IPR009003 id=c76842_g1_i1:1:265:2:+ def=IPR009003:Trypsin-like cysteine/serine peptidase domain;	87.5	1	3	5	6	4.57399		10.587	5.16948	7.73548	39.77	0	75	46.59	46.59	1		3	1	1	88	10.3071	4.95752
c90809_g4_i1:1:794:3:+	len=264 acc=c90809_g4_i1:1:794:3:+ interpro_family=IPR000407 go=GO:0016787 interpro_raw=IPR000407 ec=3.-.-.- id=c90809_g4_i1:1:794:3:+ def=IPR000407:Nucleoside phosphatase GDA1/CD39;	87.5	1	3	17	21	29.2332	16.7419	14.2729	8.07742	13.0193	64.77	65.15	23.11	23.11	40.15	5	5	5	2	3	264	28.8173	5.2749
c92359_g1_i3:422:760:2:+	len=113	87.5	3	2	7	7	7.76946	4.0492	10.195	9.90502	7.43918	66.96	73.21	46.43	36.61	42.86	1	2	1	2	1	112	12.8701	4.57666
c92438_g1_i1:273:971:3:+	len=233 acc=c92438_g1_i1:273:971:3:+ pathways= interpro_raw=IPR020830,IPR020831,IPR020829,IPR016040,IPR020828 interpro_family=IPR020831 go=GO:0016620,GO:0055114 id=c92438_g1_i1:273:971:3:+ ec=1.2.1.- def=IPR020831:Glyceraldehyde/Erythrose phosphate dehydrogenase family;	87.5	1	2	14	14	13.6219	10.6041	11.4172	7.14013	17.5262	62.93	32.33	39.66	20.69	41.81	4	2	3	2	3	232	24.1758	6.93213
c96699_g4_i2:1:313:2:+	len=104	87.5	1	1	10	11	20.43	12.6484	5.01393	3.26595	21.5426	61.54	85.58	33.65	25.96	57.69	4	2	1	1	2	104	11.0878	9.42236
c70417_g1_i1:1:149:3:+	len=49	87.5	1	1	2	2		3.96766			3.31571		68.75			41.67		1			1	48	5.48575	7.41553
c99761_g2_i1:1:195:1:+	len=65	87.5	1	2	3	3			3.22927		2.97706			75		40.63			2		1	64	7.44796	5.85889
CL3004Contig1:1:792:1:+	len=264 acc=CL3004Contig1:1:792:1:+ interpro_raw=IPR000504,IPR012677 go=GO:0000166,GO:0003676 id=CL3004Contig1:1:792:1:+ interpro_domain=IPR012677 def=IPR012677:Nucleotide-binding alpha-beta plait domain;	87.45	1	2	20	24	26.8917	74.0683	11.5584	9.22766	13.4889	65.78	53.23	34.6	23.57	29.28	6	7	2	2	3	263	28.1068	6.91748
c91012_g1_i1:1:575:3:+	len=191 acc=c91012_g1_i1:1:575:3:+ interpro_domain=IPR013783 id=c91012_g1_i1:1:575:3:+ go=GO:0005515 interpro_raw=IPR013783,IPR003961 def=IPR013783:Immunoglobulin-like fold;	87.43	1	3	7	8		7.29472	9.23848	3.86139	11.6845	0	25.13	45.03	22.51	60.21		2	2	1	3	191	20.7935	5.96045
c103784_g4_i2:1:1364:3:+	len=454 acc=c103784_g4_i2:1:1364:3:+ interpro_raw=IPR003663,IPR005828,IPR005829,IPR020846 go=GO:0022891,GO:0016021,GO:0016020,GO:0005215,GO:0055085,GO:0022857 interpro_family=IPR005828 pathways= id=c103784_g4_i2:1:1364:3:+ interpro_domain=IPR020846 def=IPR005828:General substrate transporter; IPR020846:Major facilitator superfamily domain;	87.42	3	34	50	63	73.3352	31.1344	34.5665	40.9746	125.713	77.92	40.62	54.53	46.36	44.15	16	7	8	5	17	453	49.5894	6.40479
c98474_g1_i1:682:2067:1:+	len=462 acc=c98474_g1_i1:682:2067:1:+ id=c98474_g1_i1:682:2067:1:+ interpro_domain=IPR006667 go=GO:0006812,GO:0008324 interpro_raw=IPR006667 def=IPR006667:SLC41 divalent cation transporters, integral membrane domain;	87.42	1	1	31	33	25.6129	31.3815	40.5742	22.552	45.4429	21.48	56.83	44.03	40.78	52.71	4	8	7	5	7	461	50.3084	5.30029
c105427_g1_i1:1:3507:2:+	len=1168	87.41	1	73	99	120	107.504	173.378	63.6809	74.4378	76.4106	45.12	72.6	38.96	36.9	37.76	25	37	15	16	16	1168	126.027	4.27197
c100774_g1_i1:176:535:2:+	len=120	87.39	1	1	2	3	4.79029	3.62606				87.39	42.02		0		2	1				119	13.3491	4.52588
c101355_g1_i9:333:642:3:+	len=103	87.38	1	1	4	4	14.022	11.0441				74.76	87.38	0	0		2	2				103	10.9632	4.42432
c103985_g1_i1:78:1005:3:+	len=309 acc=c103985_g1_i1:78:1005:3:+ id=c103985_g1_i1:78:1005:3:+ interpro_raw=IPR010629 = def=IPR010629:Insect allergen-related;	87.38	1	1	10	10	9.64856	14.1882	18.8288	4.59685	5.90741	35.92	21.36	53.4	27.18	25.89	2	2	4	1	1	309	34.1105	4.23389
c101831_g1_i1:170:739:2:+	len=190 acc=c101831_g1_i1:170:739:2:+ = interpro_raw=IPR018108,IPR023395 id=c101831_g1_i1:170:739:2:+ interpro_domain=IPR023395 def=IPR023395:Mitochondrial carrier domain;	87.37	1	1	12	18	26.1729	18.284	13.8852	12.1132	43.0586	42.11	56.84	51.05	37.37	77.89	4	3	2	1	5	190	21.0712	10.1548
c56585_g1_i1:1:289:3:+	len=95 acc=c56585_g1_i1:1:289:3:+ id=c56585_g1_i1:1:289:3:+ interpro_raw=IPR002809,IPR008568 go=GO:0016020 interpro_family=IPR002809 def=IPR002809:Protein of unknown function DUF106, transmembrane;	87.37	1	2	4	4	7.70423	2.83799		2.98741		75.79	44.21		24.21		2	1		1		95	11.0278	9.83252
c96667_g3_i1:1:1167:3:+	len=388 acc=c96667_g3_i1:1:1167:3:+ interpro_raw=IPR026983,IPR024743 go=GO:0003777,GO:0007018 interpro_family=IPR026983 id=c96667_g3_i1:1:1167:3:+ interpro_domain=IPR024743 def=IPR024743:Dynein heavy chain, coiled coil stalk; IPR026983:Dynein heavy chain;	87.37	1	1	15	18	17.033	16.8517	17.1838	12.4483	12.049	26.03	47.42	23.2	29.38	32.99	4	5	2	3	2	388	43.6222	8.5874
c100149_g1_i2:43:1083:1:+	len=347	87.32	1	1	32	37	49.1422	13.1648	45.3272	16.1936	87.3293	78.1	22.48	39.19	43.52	78.1	11	2	6	4	12	347	36.2728	12.0444
c103584_g4_i7:85:1269:1:+	len=395 acc=c103584_g4_i7:85:1269:1:+ interpro_raw=IPR015943,IPR017986,IPR020472,IPR001680,IPR019775 interpro_family=IPR017251 go=GO:0005515 id=c103584_g4_i7:85:1269:1:+ def=IPR017251:Apoptotic protease-activating factor 1;	87.31	6	2	21	27	36.9338	22.1698	27.1999		38.0691	50	44.67	32.74	0	48.48	5	4	6		7	394	43.492	7.85498
c93493_g1_i1:1:922:2:+	len=307 acc=c93493_g1_i1:1:922:2:+ id=c93493_g1_i1:1:922:2:+ interpro_domain=IPR020683 interpro_raw=IPR020683,IPR002110 go=GO:0005515 def=IPR020683:Ankyrin repeat-containing domain;	87.25	1	3	13	14	17.0391	11.47	8.80599	3.61092	17.9043	47.71	56.86	15.69	22.88	35.29	4	4	1	1	4	306	32.121	5.2876
c95902_g1_i2:331:660:1:+	len=110 acc=c95902_g1_i2:331:660:1:+ interpro_raw=IPR005349 go=GO:0016020 interpro_family=IPR005349 id=c95902_g1_i2:331:660:1:+ def=IPR005349:Uncharacterised protein family UPF0136, Transmembrane;	87.16	1	11	11	11	8.4212	24.5227	9.29498		13.4799	70.64	87.16	57.8		70.64	3	2	3		3	109	11.1469	9.37842
c97527_g1_i1:1:774:1:+	len=258 acc=c97527_g1_i1:1:774:1:+ ec=3.4.21.- interpro_domain=IPR009003 id=c97527_g1_i1:1:774:1:+ interpro_family=IPR001314 go=GO:0006508,GO:0004252 interpro_raw=IPR001254,IPR018114,IPR001314,IPR009003 def=IPR001314:Peptidase S1A, chymotrypsin-type; IPR009003:Trypsin-like cysteine/serine peptidase domain;	87.16	1	6	13	14	12.1919	13.8808	13.33	12.7161	3.54044	54.86	55.25	31.91	36.19	10.51	3	3	3	4	1	257	27.4528	5.2876
c100407_g1_i3:56:265:2:+	len=70 acc=c100407_g1_i3:56:265:2:+ id=c100407_g1_i3:56:265:2:+ interpro_raw=IPR001807,IPR014743 go=GO:0005247,GO:0005216,GO:0006821,GO:0055085,GO:0016020 interpro_family=IPR001807 def=IPR001807:Chloride channel, voltage gated;	87.14	1	1	1	1		7.22749				0	87.14					1				70	7.61972	5.71924
c103119_g3_i2:1:582:1:+	len=194 acc=c103119_g3_i2:1:582:1:+ interpro_family=IPR011701 go=GO:0055085,GO:0016021 interpro_raw=IPR020846,IPR011701 interpro_domain=IPR020846 id=c103119_g3_i2:1:582:1:+ def=IPR011701:Major facilitator superfamily; IPR020846:Major facilitator superfamily domain;	87.11	1	1	21	33	52.6819	26.4609	38.038	16.8798	42.5074	44.85	71.65	46.39	81.44	43.3	7	5	4	4	7	194	21.6361	8.57275
c99840_g1_i4:780:1550:3:+	len=257 acc=c99840_g1_i4:780:1550:3:+ id=c99840_g1_i4:780:1550:3:+ interpro_domain=IPR012677 interpro_raw=IPR012677,IPR000504 go=GO:0000166,GO:0003676 def=IPR012677:Nucleotide-binding alpha-beta plait domain;	87.11	1	1	14	19		21.1653	12.5502	8.82136	19.9938	0	71.88	29.3	25.39	63.28		6	4	3	4	256	27.3976	8.92432
CL9267Contig1:62:714:2:+	len=217 acc=CL9267Contig1:62:714:2:+ go=GO:0046474,GO:0016301 interpro_family=IPR026712 interpro_raw=IPR011009,IPR026712 pathways=KEGG:ec00564+2.7.1.32,UniPathway:UPA00753 id=CL9267Contig1:62:714:2:+ interpro_domain=IPR011009 def=IPR011009:Protein kinase-like domain; IPR026712:Choline/Ethanolamine kinase;	87.1	1	1	8	12	19.2192	18.1675		2.19087	4.71984	53.46	62.67		7.37	33.64	3	4		1	1	217	24.3263	6.13818
c103360_g2_i1:875:970:2:+	len=32	87.1	1	1	1	2		7.11249					87.1					1				31	3.41674	7.25439
c87916_g1_i1:63:248:3:+	len=62	87.1	1	2	2	2			3.03236		7.94208			35.48		87.1			1		1	62	7.3037	8.646
c97920_g2_i1:375:1004:3:+	len=210 acc=c97920_g2_i1:375:1004:3:+ ec=5.2.1.8 id=c97920_g2_i1:375:1004:3:+ interpro_domain=IPR002130,IPR029000 go=GO:0003755,GO:0000413,GO:0006457 interpro_family=IPR024936 interpro_raw=IPR020892,IPR024936,IPR002130,IPR029000 def=IPR002130:Cyclophilin-type peptidyl-prolyl cis-trans isomerase domain; IPR024936:Cyclophilin-type peptidyl-prolyl cis-trans isomerase; IPR029000:Cyclophilin-like doma…	87.08	1	19	20	28	8.28253	10.0229	48.018	26.302	9.13573	9.57	22.97	60.77	47.37	36.36	1	3	9	6	2	209	23.0188	8.5874
c104861_g1_i2:1:1581:1:+	len=527 acc=c104861_g1_i2:1:1581:1:+ interpro_family=IPR027140 go=GO:0006913,GO:0005488,GO:0008565 interpro_raw=IPR021133,IPR011989,IPR027140,IPR016024 interpro_domain=IPR016024 id=c104861_g1_i2:1:1581:1:+ def=IPR016024:Armadillo-type fold; IPR027140:Importin subunit beta-1;	87.07	1	3	21	24	35.8563	34.8423	44.3826		18.7757	25.48	42.4	59.89		29.85	6	8	6		3	526	57.9274	4.81787
c95972_g1_i2:194:682:2:+	len=163 acc=c95972_g1_i2:194:682:2:+ interpro_raw=IPR009792 interpro_family=IPR009792 id=c95972_g1_i2:194:682:2:+ def=IPR009792:Protein of unknown function DUF1358;	87.04	1	7	56	78	192.277	112.85	88.9805	70.7154	172.146	72.22	81.48	58.64	56.79	71.6	19	13	10	10	16	162	17.7182	9.67139
CL1215Contig1:2582:3046:3:-	len=155 acc=CL1215Contig1:2582:3046:3:- id=CL1215Contig1:2582:3046:3:- interpro_domain=IPR016135 pathways=UniPathway:UPA00143 interpro_raw=IPR000608,IPR023313,IPR016135 def=IPR016135:Ubiquitin-conjugating enzyme/RWD-like; IPR023313:Ubiquitin-conjugating enzyme, active site;	87.01	1	9	10	25	25.6685	23.5844	14.9649	22.4417	54.8982	57.14	37.01	44.81	66.88	85.06	3	2	2	4	5	154	17.7443	8.54346
c42091_g1_i1:699:931:3:+	len=77 acc=c42091_g1_i1:699:931:3:+ id=c42091_g1_i1:699:931:3:+ ec=1.1.1.- interpro_raw=IPR001557,IPR022383,IPR015955 go=GO:0005975,GO:0019752,GO:0003824,GO:0016616,GO:0055114 interpro_family=IPR001557 def=IPR001557:L-lactate/malate dehydrogenase;	87.01	1	1	7	8	18.2848			5.84985	23.6429	87.01			55.84	54.55	3			1	3	77	8.48763	10.228
c94604_g1_i2:134:667:2:+	len=178	87.01	1	23	57	75	132.387	62.8495	69.6382	45.6279	206.699	70.62	82.49	67.23	71.75	64.41	19	10	8	8	22	177	18.6678	9.48096
c104564_g2_i4:1:1203:1:+	len=401 acc=c104564_g2_i4:1:1203:1:+ interpro_family=IPR015721 go=GO:0005089,GO:0035023 interpro_raw=IPR000219,IPR011993,IPR001849 interpro_domain=IPR011993 id=c104564_g2_i4:1:1203:1:+ def=IPR011993:Pleckstrin homology-like domain; IPR015721:Rho GTP exchange factor;	87	2	1	18	27	39.7539	14.3656	17.5996	32.9271	46.7712	45.5	57.75	22.75	24.25	58	5	4	2	2	6	400	45.3188	9.02686
c98168_g1_i2:1:303:1:+	len=101 acc=c98168_g1_i2:1:303:1:+ pathways= interpro_family=IPR001804 go=GO:0055114,GO:0051287,GO:0016616,GO:0000287 interpro_raw=IPR024084,IPR001804 ec=1.1.1.- interpro_domain=IPR024084 id=c98168_g1_i2:1:303:1:+ def=IPR001804:Isocitrate and isopropylmalate dehydrogenases family; IPR024084:Isopropylmalate dehydrogenase-like domain;	87	1	2	20	25	29.0027	28.1502	26.4647	3.7481	41.8192	69	71	70	31	78	5	4	5	1	7	100	10.8256	9.99365
CL1112Contig1:396:1136:3:+	len=247 acc=CL1112Contig1:396:1136:3:+ interpro_family=IPR029431 interpro_raw=IPR029431 id=CL1112Contig1:396:1136:3:+ def=IPR029431:Tumour protein p53-inducible nuclear protein;	86.99	1	1	15	16		11.522	20.1478	5.45942	13.8532	0	44.72	49.59	34.96	15.85		4	6	3	2	246	26.3955	4.38623
c104283_g1_i2:1:741:1:+	len=247 acc=c104283_g1_i2:1:741:1:+ interpro_raw=IPR008160 = id=c104283_g1_i2:1:741:1:+ def=IPR008160:Collagen triple helix repeat;	86.99	1	4	143	196	143.484	301.144	159.7	99.4056	188.125	80.89	86.59	74.8	61.79	73.17	26	51	28	22	25	246	24.0317	7.98682
c105227_g4_i1:289:1973:1:+	len=561 acc=c105227_g4_i1:289:1973:1:+ id=c105227_g4_i1:289:1973:1:+ interpro_raw=IPR002035,IPR013694 interpro_family=IPR022440 def=IPR022440:Conserved hypothetical protein CHP03788;	86.99	1	1	28	34	49.5306	38.8461	10.6633	22.319	66.6003	53.3	47.95	21.39	28.7	44.39	7	9	4	3	7	561	62.8535	6.50732
c99163_g2_i3:1280:2410:2:+	len=377	86.97	3	1	17	23	35.7746	12.5506	49.0774	65.6654	19.5687	40.16	18.35	52.93	39.63	34.04	5	3	5	3	3	376	42.6036	4.55127
c108885_g1_i1:1:277:1:+	len=92 acc=c108885_g1_i1:1:277:1:+ id=c108885_g1_i1:1:277:1:+ interpro_domain=IPR009072,IPR002119 interpro_raw=IPR002119,IPR007125,IPR009072 go=GO:0046982,GO:0000786,GO:0005634,GO:0003677 def=IPR002119:Histone H2A; IPR009072:Histone-fold;	86.96	1	2	10	13	14.9211	4.00366	12.6686	14.1307	5.75073	84.78	26.09	66.3	55.43	38.04	4	1	4	3	1	92	9.43734	10.9165
c105235_g1_i4:1:1083:2:+	len=360 acc=c105235_g1_i4:1:1083:2:+ interpro_raw=IPR013781,IPR001360,IPR017853 interpro_family=IPR001360 go=GO:0005975,GO:0004553 interpro_domain=IPR017853 id=c105235_g1_i4:1:1083:2:+ ec=3.2.1.- def=IPR001360:Glycoside hydrolase, family 1; IPR017853:Glycoside hydrolase superfamily;	86.94	1	4	16	17	9.61447	10.7904	16.6676	7.29013	3.61694	26.67	68.61	24.17	18.89	27.5	2	7	3	2	2	360	41.1048	4.64014
c105219_g1_i8:175:1389:1:+	len=405 acc=c105219_g1_i8:175:1389:1:+ go=GO:0005615 interpro_family=IPR000215 interpro_raw=IPR023795,IPR000215,IPR023796 id=c105219_g1_i8:175:1389:1:+ interpro_domain=IPR023796 def=IPR000215:Serpin family; IPR023795:Serpin, conserved site; IPR023796:Serpin domain;	86.91	3	1	28	30	45.7445	25.5886	49.0181	11.1082	17.3872	44.94	50.12	54.07	29.14	30.62	7	5	9	4	4	405	45.5336	7.12256
c96226_g1_i1:11:196:3:-	len=62	86.89	1	1	6	8	15.5644	11.8446	4.15622			86.89	50.82	49.18			4	2	1			61	6.45018	5.26221
c105278_g1_i5:1:299:1:+	len=99 acc=c105278_g1_i5:1:299:1:+ go=GO:0034993,GO:0005639 interpro_family=IPR018539 interpro_raw=IPR018539 id=c105278_g1_i5:1:299:1:+ def=IPR018539:SUN domain-containing protein 1;	86.87	1	1	6	7	3.51319	32.5302	3.52136		10.495	38.38	86.87	26.26		73.74	1	2	1		2	99	10.7364	5.21143
CL7671Contig1:216:1748:3:+	len=511 acc=CL7671Contig1:216:1748:3:+ interpro_domain=IPR020846 id=CL7671Contig1:216:1748:3:+ interpro_family=IPR011701 go=GO:0055085,GO:0016021 interpro_raw=IPR011701,IPR020846 def=IPR011701:Major facilitator superfamily; IPR020846:Major facilitator superfamily domain;	86.86	2	19	50	63	92.9774	55.6199	70.1696	38.26	103.469	64.12	63.73	47.84	22.35	54.51	15	12	12	3	13	510	54.7818	8.54346
c73441_g1_i1:1:230:1:+	len=76 acc=c73441_g1_i1:1:230:1:+ id=c73441_g1_i1:1:230:1:+ interpro_domain=IPR007949 interpro_raw=IPR007949,IPR027312 go=GO:0000055,GO:0042273,GO:0030036 interpro_family=IPR027312 def=IPR007949:SDA1 domain; IPR027312:Sda1;	86.84	1	1	2	2					10.6924	0			0	86.84					2	76	8.77484	10.6821
c103003_g1_i3:59:448:2:+	len=130 acc=c103003_g1_i3:59:448:2:+ id=c103003_g1_i3:59:448:2:+ interpro_domain=IPR020846 interpro_raw=IPR020846 def=IPR020846:Major facilitator superfamily domain;	86.82	1	2	4	6	18.4818			4.62018	12.1578	62.02	0	0	39.53	64.34	2			1	1	129	13.4612	8.90967
c95070_g1_i2:1:278:3:+	len=92	86.81	2	4	13	16	15.1346	9.23313	10.1276	1.32348	14.1586	64.84	75.82	46.15	14.29	84.62	6	3	1	1	4	91	9.53073	11.2095
CL7485Contig1:1:1026:1:+	len=342 acc=CL7485Contig1:1:1026:1:+ interpro_domain=IPR012677 id=CL7485Contig1:1:1026:1:+ go=GO:0003676,GO:0000166 interpro_raw=IPR012677,IPR000504 def=IPR012677:Nucleotide-binding alpha-beta plait domain;	86.8	3	12	49	58	73.6497	88.7688	46.0673	24.8855	88.2976	84.46	58.36	34.31	41.35	50.44	14	17	6	5	14	341	36.0522	7.00537
c100710_g6_i1:9:532:3:+	len=174 acc=c100710_g6_i1:9:532:3:+ ec=2.4.1.- id=c100710_g6_i1:9:532:3:+ interpro_family=IPR002213 go=GO:0008152,GO:0016758 interpro_raw=IPR002213 def=IPR002213:UDP-glucuronosyl/UDP-glucosyltransferase;	86.78	1	1	10	12	26.468	15.2387	13.9201		15.4987	78.74	56.32	33.33		54.02	4	3	2		3	174	19.2364	8.33838
c99162_g1_i1:46:1431:1:+	len=462 acc=c99162_g1_i1:46:1431:1:+ interpro_family=IPR022424,IPR004539 go=GO:0006414,GO:0005525,GO:0003746,GO:0003924,GO:0005737 interpro_raw=IPR000795,IPR031157,IPR027417,IPR004539,IPR009001,IPR004161,IPR004160,IPR009000 interpro_domain=IPR027417 id=c99162_g1_i1:46:1431:1:+ def=IPR004539:Translation elongation factor EF1A, eukaryotic/archaeal; IPR022424:Translation initiation factor 2, gamma s…	86.77	1	40	63	218	258.032	152.709	166.814	194.481	151.491	65.29	58.35	53.8	44.03	43.82	32	21	23	22	12	461	50.3394	9.02686
c55749_g1_i1:498:701:3:+	len=68	86.76	1	1	4	4	9.3427	1.43886		2.35444		86.76	19.12		50		2	1		1		68	7.50944	4.42432
c76529_g2_i1:20:225:2:+	len=68 acc=c76529_g2_i1:20:225:2:+ interpro_raw=IPR012974 interpro_domain=IPR012974 id=c76529_g2_i1:20:225:2:+ def=IPR012974:NOP5, N-terminal;	86.76	1	1	2	2	6.8535					86.76					2					68	7.60073	5.0083
c93157_g1_i1:1:204:1:+	len=68 acc=c93157_g1_i1:1:204:1:+ interpro_family=IPR026983 go=GO:0007018,GO:0016887,GO:0005858,GO:0003341,GO:0003777 interpro_raw=IPR026979,IPR027417,IPR026983 ec=3.6.1.3 interpro_domain=IPR027417 id=c93157_g1_i1:1:204:1:+ def=IPR026983:Dynein heavy chain; IPR027417:P-loop containing nucleoside triphosphate hydrolase;	86.76	1	1	5	6	9.60237		4.05528			86.76		77.94			3		2			68	7.70104	9.90576
CL899Contig1:750:1430:3:+	len=227 acc=CL899Contig1:750:1430:3:+ id=CL899Contig1:750:1430:3:+ interpro_domain=IPR000467 interpro_raw=IPR000467 go=GO:0003676 def=IPR000467:G-patch domain;	86.73	2	1	12	13	11.9089	21.0946		10.8377	10.3102	38.05	52.21	0	30.53	42.48	2	5		2	4	226	25.7262	10.9458
c62958_g1_i1:1:589:2:+	len=196 acc=c62958_g1_i1:1:589:2:+ interpro_raw=IPR011527 go=GO:0005524,GO:0016021,GO:0006810,GO:0042626,GO:0055085 interpro_domain=IPR011527 id=c62958_g1_i1:1:589:2:+ def=IPR011527:ABC transporter type 1, transmembrane domain;	86.73	1	10	14	16	13.8217	26.3416			45.4034	63.78	71.43	0		66.84	3	5			6	196	21.8031	7.00537
c71157_g1_i1:1:344:3:+	len=114 acc=c71157_g1_i1:1:344:3:+ id=c71157_g1_i1:1:344:3:+ interpro_domain=IPR009072 go=GO:0046982,GO:0000786,GO:0003677 interpro_family=IPR000558 interpro_raw=IPR009072,IPR007125,IPR000558 def=IPR000558:Histone H2B; IPR009072:Histone-fold;	86.73	1	1	22	30	90.8968	8.34303	31.1237	6.20293	23.4981	86.73	33.63	72.57	39.82	69.91	13	2	5	1	4	113	12.5735	9.83252
c102169_g1_i1:1:228:1:+	len=76 acc=c102169_g1_i1:1:228:1:+ ec=2.7.1.40 id=c102169_g1_i1:1:228:1:+ pathways=MetaCyc:PWY-5484,MetaCyc:PWY-7218,MetaCyc:PWY-7003,MetaCyc:PWY-7383,KEGG:ec00010+2.7.1.40,KEGG:ec00230+2.7.1.40,KEGG:ec00620+2.7.1.40,MetaCyc:PWY-6142,MetaCyc:PWY-1042,MetaCyc:PWY-2221,UniPathway:UPA00109,MetaCyc:PWY-6886,MetaCyc:PWY-5723,MetaCyc:PWY-6901 interpro_family=IPR001697 go=GO:0006096,GO:0000287,GO:003095…	86.67	1	1	5	6	9.27837	12.6449		10.5409	4.46466	82.67	82.67	0	74.67	52	1	2		2	1	75	7.4789	7.12256
c61599_g1_i1:1:225:1:+	len=75	86.67	1	1	3	3	4.82874	4.48035				86.67	70.67	0			1	2				75	7.76384	9.5249
c62604_g1_i2:1:271:1:+	len=90 acc=c62604_g1_i2:1:271:1:+ id=c62604_g1_i2:1:271:1:+ interpro_family=IPR013657 go=GO:0055085 interpro_raw=IPR013657 def=IPR013657:UAA transporter;	86.67	1	1	1	2	10.3093					86.67	0	0			1					90	9.91808	8.23584
c79768_g2_i1:1:450:1:+	len=150 acc=c79768_g2_i1:1:450:1:+ interpro_domain=IPR020846 id=c79768_g2_i1:1:450:1:+ interpro_raw=IPR020846,IPR005828,IPR005829 interpro_family=IPR005828 go=GO:0016021,GO:0055085,GO:0022857,GO:0005215 def=IPR005828:General substrate transporter; IPR020846:Major facilitator superfamily domain;	86.67	1	1	7	8	4.57154	3.41647	5.28378	2.96558	14.8789	55.33	22	32.67	27.33	67.33	2	1	1	1	3	150	16.1404	5.94775
c93435_g1_i2:47:319:2:+	len=91	86.67	1	1	6	6	7.89806			10.7955	18.1519	70	0	0	86.67	74.44	2			2	2	90	8.96191	6.771
c99761_g6_i1:1:226:2:+	len=75	86.67	1	1	4	5			8.52744		11.6613	0		65.33	0	73.33			2		2	75	7.70637	7.43018
c105897_g1_i1:1:227:3:+	len=75 acc=c105897_g1_i1:1:227:3:+ pathways= interpro_raw=IPR013649 interpro_domain=IPR013649 id=c105897_g1_i1:1:227:3:+ def=IPR013649:Integrin alpha-2;	86.67	1	1	1	1					7.59555			0		86.67					1	75	8.10114	5.31299
CL284Contig2:282:2732:3:+	len=817 acc=CL284Contig2:282:2732:3:+ id=CL284Contig2:282:2732:3:+ interpro_family=IPR001807 go=GO:0005247,GO:0005216,GO:0016020,GO:0055085,GO:0006821 interpro_raw=IPR001807,IPR000644,IPR014743 def=IPR001807:Chloride channel, voltage gated;	86.64	3	61	76	87	132.845	70.0604	45.1523	47.0833	161.003	41.67	38.11	36.64	34.8	40.32	23	13	10	10	26	816	89.6659	7.10791
c100809_g1_i5:1:791:3:+	len=263 acc=c100809_g1_i5:1:791:3:+ interpro_raw=IPR020846,IPR011701 go=GO:0055085,GO:0016021 interpro_family=IPR011701 id=c100809_g1_i5:1:791:3:+ interpro_domain=IPR020846 def=IPR011701:Major facilitator superfamily; IPR020846:Major facilitator superfamily domain;	86.64	2	0	32	40	35.0829	55.8097	32.6484	34.7307	25.451	65.27	77.1	53.82	55.34	48.85	7	12	6	5	4	262	28.1344	8.92432
c90836_g2_i1:66:403:3:+	len=112	86.61	1	1	7	7	11.2962	14.4543			8.20526	50	86.61			50.89	2	4			1	112	12.8699	8.41162
c90033_g2_i1:1:541:3:+	len=179 acc=c90033_g2_i1:1:541:3:+ ec=3.4.11.- id=c90033_g2_i1:1:541:3:+ go=GO:0008235,GO:0005622,GO:0005737,GO:0019538,GO:0030145,GO:0006508,GO:0004177 interpro_family=IPR011356 interpro_raw=IPR000819,IPR011356 pathways=MetaCyc:PWY-5988,KEGG:ec00480+3.4.11.1,MetaCyc:PWY-6018 def=IPR011356:Leucine aminopeptidase/peptidase B;	86.59	1	2	9	10	2.76409	10.6365	3.56889	2.78888	14.8164	17.88	40.78	15.64	8.94	74.3	1	3	1	1	3	179	18.7585	4.95752
CL865Contig2:267:827:3:+	len=187	86.56	1	2	6	6		25.8546	9.77239		5.86462	0	81.72	27.42		19.35		4	1		1	186	21.4133	8.04541
c81719_g2_i1:1:314:2:+	len=104 acc=c81719_g2_i1:1:314:2:+ id=c81719_g2_i1:1:314:2:+ interpro_domain=IPR027410 interpro_raw=IPR027410,IPR002423 go=GO:0005524 interpro_family=IPR002423 def=IPR002423:Chaperonin Cpn60/TCP-1 family; IPR027410:TCP-1-like chaperonin intermediate domain;	86.54	1	1	2	2		5.77295			7.45908	0	47.12			49.04		1			1	104	11.0996	4.52588
c91190_g1_i1:1:314:3:+	len=104 acc=c91190_g1_i1:1:314:3:+ id=c91190_g1_i1:1:314:3:+ interpro_raw=IPR001734 interpro_family=IPR001734 go=GO:0055085,GO:0006810,GO:0005215,GO:0016020 def=IPR001734:Sodium/solute symporter;	86.54	1	8	9	10	10.8397		10.6638	5.48438	20.7016	80.77	0	50.96	51.92	81.73	3		2	1	3	104	11.2102	8.86572
CL3215Contig1:112:1272:1:+	len=387 acc=CL3215Contig1:112:1272:1:+ id=CL3215Contig1:112:1272:1:+ interpro_domain=IPR001781,IPR001478,IPR006643 go=GO:0005515,GO:0008270 interpro_raw=IPR001478,IPR001781,IPR006643 def=IPR001478:PDZ domain; IPR001781:Zinc finger, LIM-type; IPR006643:ZASP;	86.53	1	23	79	108	241.659	88.6337	39.521	122.482	175.649	71.24	81.09	42.23	51.55	59.84	31	15	8	15	26	386	40.682	9.08545
c98134_g1_i3:153:1400:3:+	len=416 acc=c98134_g1_i3:153:1400:3:+ interpro_domain=IPR023395 id=c98134_g1_i3:153:1400:3:+ interpro_raw=IPR023395,IPR018108 = def=IPR023395:Mitochondrial carrier domain;	86.51	2	2	22	24	42.5495	21.6071	3.16201		46.2899	67.71	62.41	15.18	0	26.99	8	7	2		5	415	46.6528	9.72998
c90256_g2_i1:1:445:1:+	len=148 acc=c90256_g2_i1:1:445:1:+ interpro_domain=IPR013781,IPR029070,IPR017853 id=c90256_g2_i1:1:445:1:+ ec=3.2.1.- interpro_raw=IPR017853,IPR029070,IPR001223,IPR013781 go=GO:0004553,GO:0005975 def=IPR013781:Glycoside hydrolase, catalytic domain; IPR017853:Glycoside hydrolase superfamily; IPR029070:Chitinase insertion domain;	86.49	1	1	20	31	34.6845	64.8998	7.7667	20.7201	18.6584	61.49	86.49	29.05	37.84	33.78	6	8	2	4	3	148	16.9291	5.30029
c96442_g1_i1:1:336:1:+	len=112 acc=c96442_g1_i1:1:336:1:+ interpro_raw=IPR001320 go=GO:0016020,GO:0004970 interpro_domain=IPR001320 id=c96442_g1_i1:1:336:1:+ def=IPR001320:Ionotropic glutamate receptor;	86.49	1	5	13	14	24.0106		13.5216	5.39413	8.79723	86.49	0	58.56	32.43	69.37	4		4	2	3	111	12.2012	5.31299
c97552_g1_i1:1:403:2:+	len=134	86.47	1	2	3	7		9.02663	9.59448	5.82754			81.2	42.11	36.09			2	2	1		133	15.0631	5.57959
c95133_g1_i1:1:292:2:+	len=97	86.46	1	6	9	12	14.7087	22.7964	4.59358	5.48068	3.65384	53.13	83.33	31.25	44.79	45.83	2	6	1	1	1	96	10.389	4.65283
c101054_g1_i5:417:1478:3:+	len=354 acc=c101054_g1_i5:417:1478:3:+ interpro_raw=IPR029058,IPR000073 interpro_domain=IPR029058 id=c101054_g1_i5:417:1478:3:+ def=IPR029058:Alpha/Beta hydrolase fold;	86.4	2	4	17	21	14.187	36.4967	6.16262	37.3002	23.6776	30.31	53.54	17.56	48.44	46.74	2	6	2	5	4	353	39.6662	7.29834
c102916_g1_i2:111:863:3:+	len=251 acc=c102916_g1_i2:111:863:3:+ pathways=MetaCyc:PWY-6922,MetaCyc:PWY-5737,UniPathway:UPA00261,KEGG:ec00330+1.5.5.2 interpro_family=IPR015659 go=GO:0004657,GO:0006562 interpro_raw=IPR015659,IPR029041 ec=1.5.99.8 interpro_domain=IPR029041 id=c102916_g1_i2:111:863:3:+ def=IPR015659:Proline oxidase; IPR029041:FAD-linked oxidoreductase-like;	86.4	2	3	10	13	4.01864	20.5472	5.04327	30.5093	9.22519	18.8	32.8	17.6	64	39.2	1	3	1	3	2	250	28.4886	8.03076
c100057_g1_i1:151:660:1:+	len=170 acc=c100057_g1_i1:151:660:1:+ pathways=MetaCyc:PWY-7227,MetaCyc:PWY-7176,MetaCyc:PWY-7197,MetaCyc:PWY-6545,KEGG:ec00240+2.7.4.6,MetaCyc:PWY-7184,MetaCyc:PWY-7187,MetaCyc:PWY-7220,MetaCyc:PWY-7221,KEGG:ec00230+2.7.4.6,MetaCyc:PWY-7198,MetaCyc:PWY-7226,MetaCyc:PWY-7210,MetaCyc:PWY-7222,MetaCyc:PWY-7205,MetaCyc:PWY-7224 go=GO:0004550,GO:0005524,GO:0006241,GO:0006183,GO:0006228,GO:0006165 int…	86.39	1	2	40	62	138.979	41.8001	89.1722	28.5563	69.5472	84.02	75.15	86.39	47.93	79.29	13	7	11	5	11	169	18.8879	8.42627
c105595_g2_i5:500:1141:2:+	len=214 acc=c105595_g2_i5:500:1141:2:+ interpro_raw=IPR020846 id=c105595_g2_i5:500:1141:2:+ interpro_domain=IPR020846 def=IPR020846:Major facilitator superfamily domain;	86.38	3	1	11	14	20.4738	21.816	15.6957	5.56561	8.83208	50.7	82.16	55.87	23.47	25.82	4	5	2	1	1	213	23.249	7.29834
CL2435Contig1:288:1433:3:+	len=382 acc=CL2435Contig1:288:1433:3:+ interpro_family=IPR015676 interpro_raw=IPR015676,IPR002087 id=CL2435Contig1:288:1433:3:+ def=IPR015676:Tob;	86.35	1	43	51	59	73.3877	78.93	28.101	31.0114	54.5219	70.87	65.88	38.32	34.12	65.35	13	14	8	9	12	381	41.8751	8.82178
CL4679Contig1:551:902:2:+	len=117 acc=CL4679Contig1:551:902:2:+ id=CL4679Contig1:551:902:2:+ interpro_domain=IPR023476 ec=3.1.1.29 interpro_raw=IPR023476,IPR002833 go=GO:0004045 interpro_family=IPR002833 def=IPR002833:Peptidyl-tRNA hydrolase, PTH2; IPR023476:Peptidyl-tRNA hydrolase II domain;	86.32	1	3	14	18	39.8324	18.8774	25.4483	5.76078	26.2633	71.79	77.78	69.23	69.23	69.23	5	2	3	2	4	117	12.5575	9.86182
c101282_g2_i2:362:1240:2:+	len=293 acc=c101282_g2_i2:362:1240:2:+ id=c101282_g2_i2:362:1240:2:+ interpro_domain=IPR000477 interpro_raw=IPR000477 def=IPR000477:Reverse transcriptase domain;	86.3	1	3	10	12	18.098	17.3466			12.2039	57.19	67.47		0	31.16	4	5			3	292	32.238	8.27979
c102133_g4_i3:115:336:2:-	len=74	86.3	1	1	4	6		9.74922			15.1869	0	72.6			82.19		2			2	73	7.9001	10.1255
c105201_g2_i5:1:2013:1:+	len=671 acc=c105201_g2_i5:1:2013:1:+ interpro_family=IPR000844,IPR030260 go=GO:0005524,GO:0016887,GO:0016021,GO:0006810,GO:0005743,GO:0042626,GO:0055085 interpro_raw=IPR030260,IPR017871,IPR011527,IPR027417,IPR003439,IPR003593 ec=3.6.1.3 interpro_domain=IPR027417 id=c105201_g2_i5:1:2013:1:+ def=IPR000844:ATP-binding cassette subfamily C member 8; IPR027417:P-loop containing nucleoside triphosphate…	86.29	3	1	49	61	56.5736	39.5598	64.4168	55.2923	90.0475	44.56	47.69	42.18	44.56	57.82	12	10	11	7	14	671	73.7816	8.92432
c103331_g2_i8:125:520:2:+	len=132 acc=c103331_g2_i8:125:520:2:+ id=c103331_g2_i8:125:520:2:+ interpro_raw=IPR001152 go=GO:0003785,GO:0007015 interpro_family=IPR001152 def=IPR001152:Beta-thymosin;	86.26	2	2	13	30	15.6697	25.8557	54.0499	44.2049	12.2467	50.38	80.92	61.07	54.96	51.91	2	5	8	6	2	131	14.4885	5.38916
c104121_g2_i5:508:990:1:+	len=161 acc=c104121_g2_i5:508:990:1:+ interpro_raw=IPR005479,IPR005481,IPR011761,IPR011764,IPR013816,IPR016185 go=GO:0004075,GO:0008152,GO:0046872,GO:0003824,GO:0005524 interpro_family=IPR006284 id=c104121_g2_i5:508:990:1:+ interpro_domain=IPR011764 ec=6.3.4.14 def=IPR006284:Glutathione synthetase, prokaryotic; IPR011764:Biotin carboxylation domain;	86.25	1	1	8	9		7.5992	16.9903	6.20188	11.4145		46.88	80.63	40.63	43.75		2	2	2	3	160	16.9165	5.5542
c101530_g1_i6:1:504:2:+	len=167 acc=c101530_g1_i6:1:504:2:+ interpro_raw=IPR015917,IPR016129,IPR029030,IPR001309,IPR002138,IPR011600 go=GO:0008234,GO:0004197,GO:0006508,GO:0006915 id=c101530_g1_i6:1:504:2:+ interpro_domain=IPR029030 ec=3.4.-.-,3.4.22.- def=IPR016129:Peptidase C14, ICE, catalytic subunit p20, active site; IPR029030:Caspase-like domain;	86.23	2	2	5	5		9.92474	4.37488	5.1112		0	56.89	26.95	20.96			3	1	1		167	19.0327	9.0415
CL8699Contig1:1:590:2:+	len=196 acc=CL8699Contig1:1:590:2:+ interpro_raw=IPR000210,IPR013069,IPR011333 go=GO:0005515 interpro_domain=IPR013069,IPR011333 id=CL8699Contig1:1:590:2:+ def=IPR011333:BTB/POZ fold; IPR013069:BTB/POZ;	86.22	1	6	7	11	13.207	8.30474	22.1728	1.32048		14.8	46.43	58.16	6.12	0	1	2	4	1		196	21.9958	7.04932
c100088_g2_i1:363:953:3:+	len=197 acc=c100088_g2_i1:363:953:3:+ interpro_family=IPR024706 go=GO:0055114,GO:0051920,GO:0016491,GO:0016209 interpro_raw=IPR012336,IPR019479,IPR024706,IPR000866 pathways=KEGG:ec00480+1.11.1.15 ec=1.11.1.15 interpro_domain=IPR012336 id=c100088_g2_i1:363:953:3:+ def=IPR012336:Thioredoxin-like fold; IPR024706:Peroxiredoxin, AhpC-type;	86.22	1	22	22	52	83.0018	32.787	36.6969	37.0463	12.852	60.71	46.94	40.82	44.9	35.2	11	7	6	6	3	196	21.8401	5.94775
c97243_g2_i2:268:1836:1:+	len=523 acc=c97243_g2_i2:268:1836:1:+ interpro_raw=IPR020846,IPR005828,IPR005829 interpro_family=IPR005828 go=GO:0016021,GO:0055085,GO:0022857,GO:0005215 interpro_domain=IPR020846 id=c97243_g2_i2:268:1836:1:+ def=IPR005828:General substrate transporter; IPR020846:Major facilitator superfamily domain;	86.21	1	1	30	38	81.3727	51.9537	9.10847	8.7143	57.14	65.13	68.77	11.3	21.07	38.7	13	7	2	3	9	522	57.43	8.20654
	>sp|K22E_HUMAN|	86.2	1	81	100	137	99.9335	86.9016	34.9688	174.662	154.751	55.5	68.37	36.12	59.38	58.91	27	19	11	31	26	645	65.8254	8.00146
CL299Contig1:4968:5339:3:+	len=124	86.18	1	2	7	10	4.68291	12.1232	11.1791		12.6245	32.52	75.61	69.11		59.35	1	3	2		4	123	13.6293	10.2573
c98566_g2_i1:274:1511:1:+	len=412 acc=c98566_g2_i1:274:1511:1:+ interpro_domain=IPR020683 id=c98566_g2_i1:274:1511:1:+ go=GO:0005515 interpro_raw=IPR020683,IPR002110 def=IPR020683:Ankyrin repeat-containing domain;	86.17	2	6	26	27	24.9212	35.5963	25.8627	19.6621	11.6897	49.51	42.72	36.41	40.53	37.86	6	8	5	5	3	412	44.2543	8.646
c54358_g1_i2:1:218:2:+	len=72 acc=c54358_g1_i2:1:218:2:+ go=GO:0055085,GO:0006810,GO:0005215,GO:0016020 interpro_family=IPR001734 interpro_raw=IPR001734 id=c54358_g1_i2:1:218:2:+ def=IPR001734:Sodium/solute symporter;	86.11	1	1	2	3	9.97505				5.86462	86.11		0		52.78	2				1	72	7.99808	6.354
c64143_g1_i1:1:239:1:+	len=79 acc=c64143_g1_i1:1:239:1:+ pathways=MetaCyc:PWY-3841,MetaCyc:PWY-3661-1,MetaCyc:PWY-3661,MetaCyc:PWY-5497,MetaCyc:PWY-181,MetaCyc:PWY-2161,KEGG:ec00670+2.1.2.1,KEGG:ec00460+2.1.2.1,MetaCyc:PWY-2201,MetaCyc:PWY-1622,KEGG:ec00630+2.1.2.1,UniPathway:UPA00288,UniPathway:UPA00193,KEGG:ec00260+2.1.2.1,KEGG:ec00680+2.1.2.1 interpro_raw=IPR001085,IPR015421,IPR019798,IPR015424 interpro_family=IPR00…	86.08	1	1	6	6	4.93108		7.09556	11.8174		51.9		74.68	39.24		1		1	4		79	8.45244	9.71533
c101517_g2_i4:23:389:2:+	len=122 acc=c101517_g2_i4:23:389:2:+ interpro_raw=IPR002347,IPR002198,IPR016040 go=GO:0008152,GO:0016491 interpro_family=IPR002347 id=c101517_g2_i4:23:389:2:+ ec=1.-.-.- def=IPR002347:Glucose/ribitol dehydrogenase;	86.07	2	3	5	11	25.2816	12.3552		19.6902		81.97	85.25	0	40.98	0	3	2		2		122	13.2131	8.99756
CL9482Contig1:1:540:2:+	len=179 acc=CL9482Contig1:1:540:2:+ id=CL9482Contig1:1:540:2:+ interpro_domain=IPR020846 interpro_raw=IPR020846,IPR011701 go=GO:0016021,GO:0055085 interpro_family=IPR011701 def=IPR011701:Major facilitator superfamily; IPR020846:Major facilitator superfamily domain;	86.03	1	1	7	7	12.9291		4.41699	4.89981	16.2493	64.25	0	28.49	16.76	45.81	3		1	1	2	179	19.2943	8.99756
c104555_g2_i2:356:2053:2:+	len=566	86.02	1	1	35	38	31.0406	63.2465	40.8365	34.8753	8.82979	40.35	66.19	28.32	26.02	10.09	8	12	9	7	1	565	61.4267	8.73389
c100578_g1_i1:79:846:1:+	len=256 acc=c100578_g1_i1:79:846:1:+ interpro_raw=IPR019819,IPR002018,IPR029058,IPR019826 interpro_domain=IPR029058 id=c100578_g1_i1:79:846:1:+ def=IPR029058:Alpha/Beta hydrolase fold;	85.94	1	10	14	20	13.6569	18.3597	7.3395	23.6789		28.52	55.08	44.14	43.75		4	3	4	6		256	28.4287	8.98291
c84765_g1_i1:106:300:1:+	len=65 acc=c84765_g1_i1:106:300:1:+ interpro_raw=IPR010580 interpro_family=IPR010580 go=GO:0005783 id=c84765_g1_i1:106:300:1:+ def=IPR010580:Stress-associated endoplasmic reticulum protein;	85.94	1	1	3	3	4.53361	5.99847			7.96981	43.75	82.81			76.56	1	1			1	64	7.04678	11.0483
c65212_g1_i1:1:216:2:+	len=71 acc=c65212_g1_i1:1:216:2:+ interpro_domain=IPR023796 id=c65212_g1_i1:1:216:2:+ interpro_raw=IPR023796 def=IPR023796:Serpin domain;	85.92	2	1	5	6		22.6944	4.25209	3.54599		0	85.92	46.48	43.66			3	1	1		71	7.5199	5.17334
c101551_g1_i2:1:576:1:+	len=192 acc=c101551_g1_i2:1:576:1:+ interpro_raw=IPR028676,IPR000727 go=GO:0000149,GO:0000046,GO:0006888,GO:0097111,GO:0005515 interpro_family=IPR028676 id=c101551_g1_i2:1:576:1:+ interpro_domain=IPR000727 def=IPR000727:Target SNARE coiled-coil domain; IPR028676:Syntaxin-17;	85.86	1	1	8	9	11.8399	19.7027		5.35723	5.47194	46.07	45.03	0	24.61	24.08	2	4		1	1	191	21.5368	5.24951
c100930_g2_i1:46:684:1:+	len=213 acc=c100930_g2_i1:46:684:1:+ go=GO:0042302 interpro_family=IPR000618 interpro_raw=IPR000618 id=c100930_g2_i1:46:684:1:+ def=IPR000618:Insect cuticle protein;	85.85	1	18	20	25	16.8401	31.7404	6.39591	2.86793	3.68412	54.25	53.77	29.72	16.51	13.21	7	10	2	1	2	212	24.1877	8.93896
c97260_g1_i1:103:1758:1:+	len=552 acc=c97260_g1_i1:103:1758:1:+ ec=3.6.3.- interpro_domain=IPR027417,IPR023366 id=c97260_g1_i1:103:1758:1:+ pathways=KEGG:ec00195+3.6.3.14,MetaCyc:PWY-7219,KEGG:ec00190+3.6.3.14 interpro_family=IPR005294 go=GO:0046034,GO:0046961,GO:0005524,GO:0016820,GO:0015986,GO:0033178,GO:0015992,GO:0015991,GO:0046933,GO:0045261 interpro_raw=IPR004100,IPR020003,IPR000194,IPR005294,IPR023366,IPR027417,IPR…	85.84	1	59	65	82	123.016	105.822	82.2558	40.4705	99.8427	72.23	57.17	54.45	36.84	65.34	20	15	16	8	14	551	59.4105	8.93896
CL8629Contig1:874:1998:1:+	len=375 acc=CL8629Contig1:874:1998:1:+ id=CL8629Contig1:874:1998:1:+ interpro_domain=IPR029048,IPR029047 interpro_family=IPR013126 interpro_raw=IPR013126,IPR029048,IPR018181,IPR029047 def=IPR013126:Heat shock protein 70 family; IPR029047:Heat shock protein 70kD, peptide-binding domain; IPR029048:Heat shock protein 70kD, C-terminal domain;	85.83	1	19	37	50	61.8022	91.7814	39.24	26.523	84.4325	59.89	60.16	30.48	30.75	43.58	11	16	4	4	12	374	40.8639	4.86865
CL7993Contig1:110:1125:2:+	len=338	85.8	1	18	50	68	76.1952	83.5328	62.4834	53.859	115.836	64.79	78.4	79.29	52.37	74.56	13	13	11	6	13	338	36.0467	10.0376
c102988_g3_i1:227:946:2:+	len=240 acc=c102988_g3_i1:227:946:2:+ id=c102988_g3_i1:227:946:2:+ interpro_domain=IPR029071 go=GO:0005515 interpro_raw=IPR029071,IPR000626 def=IPR029071:Ubiquitin-related domain;	85.77	2	5	9	9		2.64774	14.549	9.10046	5.42194		21.34	64.44	30.13	15.9		1	4	2	2	239	26.229	5.70654
CL1222Contig1:1799:2749:2:+	len=317 acc=CL1222Contig1:1799:2749:2:+ go=GO:0046872 interpro_raw=IPR007087 id=CL1222Contig1:1799:2749:2:+ interpro_domain=IPR007087 def=IPR007087:Zinc finger, C2H2;	85.76	1	1	24	26	16.7166	45.8304	5.3772	39.6858	30.0572	61.71	52.53	10.76	75.95	67.72	5	7	1	8	4	316	33.9154	9.61279
CL1380Contig1:45:383:3:+	len=113 acc=CL1380Contig1:45:383:3:+ id=CL1380Contig1:45:383:3:+ ec=1.1.1.- interpro_raw=IPR001557,IPR015955 go=GO:0005975,GO:0055114,GO:0019752,GO:0003824,GO:0016616 interpro_family=IPR001557 def=IPR001557:L-lactate/malate dehydrogenase;	85.71	1	1	3	5		20.3965		3.23594		0	76.79		51.79	0		2		1		112	12.5858	9.0415
c38180_g1_i1:1:380:2:+	len=126 acc=c38180_g1_i1:1:380:2:+ interpro_raw=IPR003350,IPR010982 go=GO:0003677 id=c38180_g1_i1:1:380:2:+ interpro_domain=IPR010982,IPR003350 def=IPR003350:CUT domain; IPR010982:Lambda repressor-like, DNA-binding domain;	85.71	1	35	36	53	30.7416	18.7321	31.4094	17.64	10.9219	42.86	44.44	85.71	35.71	40.48	12	9	11	7	5	126	14.3045	10.4185
c90539_g1_i2:25:216:1:+	len=64 acc=c90539_g1_i2:25:216:1:+ go=GO:0004252,GO:0006508 interpro_raw=IPR009003,IPR001254 ec=3.4.21.- id=c90539_g1_i2:25:216:1:+ interpro_domain=IPR009003 def=IPR009003:Trypsin-like cysteine/serine peptidase domain;	85.71	1	1	8	8	2.6172	12.2842	9.01783	2.90003		49.21	79.37	79.37	53.97		1	3	3	1		63	6.92668	9.51025
c93190_g1_i1:94:452:1:+	len=119 acc=c93190_g1_i1:94:452:1:+ id=c93190_g1_i1:94:452:1:+ interpro_family=IPR026505 interpro_raw=IPR026505 def=IPR026505:Solute carrier family 35 member F3/F4;	85.71	1	1	13	19	23.5749	16.7692	6.27372	11.314	31.5792	73.11	68.91	33.61	44.54	78.99	5	4	2	2	3	119	12.3746	5.8335
c99107_g1_i1:1:254:2:-	len=84	85.71	1	1	2	3	6.1427	7.34749				73.81	64.29				1	1				84	9.55996	9.43701
c94279_g1_i1:718:846:1:+	len=43	85.71	1	1	1	1				3.24222					85.71					1		42	4.75831	8.67529
c105510_g1_i7:1:714:1:+	len=238 acc=c105510_g1_i7:1:714:1:+ id=c105510_g1_i7:1:714:1:+ interpro_domain=IPR027417 go=GO:0005524,GO:0003774,GO:0016459 interpro_raw=IPR001609,IPR027417 def=IPR027417:P-loop containing nucleoside triphosphate hydrolase;	85.65	2	1	9	11	11.251	11.6729		9.18611	25.3399	59.07	38.4	0	22.78	33.76	3	2		2	3	237	26.7947	8.45557
c74942_g1_i1:1:672:2:+	len=223 acc=c74942_g1_i1:1:672:2:+ go=GO:0003676,GO:0005524 interpro_family=IPR004589 interpro_raw=IPR011545,IPR001650,IPR014001,IPR000629,IPR027417 id=c74942_g1_i1:1:672:2:+ interpro_domain=IPR027417 def=IPR000629:ATP-dependent RNA helicase DEAD-box, conserved site; IPR004589:DNA helicase, ATP-dependent, RecQ type; IPR027417:P-loop containing nucleoside triphosphate hydrolase;	85.65	1	6	12	17	32.7229	11.2182	6.27883	37.3661	16.4031	74.44	56.95	25.11	50.22	30.04	3	2	2	4	3	223	25.6012	7.73779
CL1406Contig1:950:3268:2:+	len=773	85.64	2	3	70	83	35.0464	76.7055	72.5685	76.4613	51.0254	29.75	45.02	75.29	57.31	38.03	8	18	21	18	10	773	83.5707	7.73779
c112189_g1_i1:1:439:2:+	len=146 acc=c112189_g1_i1:1:439:2:+ id=c112189_g1_i1:1:439:2:+ interpro_domain=IPR000477 interpro_raw=IPR000477 def=IPR000477:Reverse transcriptase domain;	85.62	1	1	4	4		4.31449			19.0357	0	44.52			55.48		1			3	146	16.6684	7.45947
c102017_g1_i1:162:1373:3:+	len=404 acc=c102017_g1_i1:162:1373:3:+ interpro_raw=IPR006773 go=GO:0005634,GO:0005737 interpro_family=IPR006773 id=c102017_g1_i1:162:1373:3:+ def=IPR006773:26S proteasome complex ubiquitin receptor, subunit Rpn13;	85.61	1	45	58	79	52.5369	109.842	61.4326	61.3603	35.9104	49.13	67.74	57.82	51.36	49.88	10	20	14	13	10	403	43.3071	5.36377
c104488_g3_i1:1:732:1:+	len=244 acc=c104488_g3_i1:1:732:1:+ go=GO:0008152,GO:0016491 interpro_family=IPR002347 interpro_raw=IPR002198,IPR020904,IPR002347,IPR016040 ec=1.-.-.- id=c104488_g3_i1:1:732:1:+ def=IPR002347:Glucose/ribitol dehydrogenase;	85.6	1	11	30	41	41.4863	28.9917	51.6177	14.6096	119.452	85.19	54.32	69.14	34.57	79.84	9	5	6	2	12	243	26.1411	8.99756
c90120_g1_i1:1:337:3:+	len=111 acc=c90120_g1_i1:1:337:3:+ ec=1.1.1.- id=c90120_g1_i1:1:337:3:+ interpro_domain=IPR024084 pathways= go=GO:0000287,GO:0016616,GO:0055114,GO:0051287 interpro_family=IPR001804 interpro_raw=IPR001804,IPR024084 def=IPR001804:Isocitrate and isopropylmalate dehydrogenases family; IPR024084:Isopropylmalate dehydrogenase-like domain;	85.59	1	4	10	11	12.1498	15.3211	4.93668	6.64075	6.9449	74.77	73.87	33.33	45.95	52.25	2	3	2	1	2	111	12.5775	9.17334
c92565_g2_i1:1:292:2:+	len=97	85.57	1	1	5	6	7.73781	11.2704			3.93115	49.48	60.82		0	48.45	2	2			1	97	10.4805	8.51416
CL825Contig1:1118:3031:2:+	len=638 acc=CL825Contig1:1118:3031:2:+ id=CL825Contig1:1118:3031:2:+ interpro_raw=IPR022166 interpro_family=IPR022166 def=IPR022166:Protein of unknown function DUF3697, ubiquitin-associated protein 2;	85.56	2	22	101	120	111.736	126.757	121.236	118.261	135.499	55.1	64.52	59.5	63.42	67.82	18	28	23	19	19	637	67.3112	7.2251
CL9529Contig1:861:1589:3:+	len=243 acc=CL9529Contig1:861:1589:3:+ interpro_family=IPR013176 interpro_raw=IPR013176 id=CL9529Contig1:861:1589:3:+ def=IPR013176:Protein of unknown function DUF1712, fungi;	85.54	1	1	8	9	12.8135	17.7336	8.56094	3.30654		52.89	32.23	33.47	17.36		3	3	2	1		242	27.2412	9.15869
c102266_g1_i1:112:360:1:+	len=83 acc=c102266_g1_i1:112:360:1:+ interpro_domain=IPR013783 id=c102266_g1_i1:112:360:1:+ interpro_raw=IPR003961,IPR013783 go=GO:0005515 def=IPR013783:Immunoglobulin-like fold;	85.54	1	1	3	3	1.75613			3.92919	8.36611	14.46	0		73.49	80.72	1			1	1	83	9.49776	8.5874
c105277_g1_i1:285:2567:3:+	len=761 acc=c105277_g1_i1:285:2567:3:+ interpro_domain=IPR006108,IPR029045 id=c105277_g1_i1:285:2567:3:+ ec=1.1.1.35,4.2.1.17 pathways=KEGG:ec00627+4.2.1.17,MetaCyc:PWY-7094,UniPathway:UPA00659,KEGG:ec00640+4.2.1.17,MetaCyc:PWY-6944,MetaCyc:PWY-7046,MetaCyc:PWY-7216,KEGG:ec00720+4.2.1.17,MetaCyc:PWY-1361,MetaCyc:PWY-5109,MetaCyc:PWY-6435,MetaCyc:PWY-5177,MetaCyc:PWY-7606,KEGG:ec00310+4.2.1.17,KEG…	85.53	1	59	77	108	156.256	104.209	116.198	66.9662	179.564	65.53	61.18	42.76	43.16	44.21	18	17	14	14	21	760	82.2295	9.23193
CL7983Contig1:216:653:3:+	len=146	85.52	1	2	6	6	8.76185			8.50082	30.0447	46.9			46.21	85.52	1			1	4	145	17.1133	10.6821
c100183_g1_i1:1986:2195:3:+	len=70	85.51	1	1	7	7	29.2255	8.13425		4.70661		76.81	72.46		63.77		5	1		1		69	7.95609	9.83252
c95209_g2_i2:1:190:2:+	len=63	85.48	1	1	2	2				4.12848	4.09553		0		58.06	62.9				1	1	62	6.94374	9.78857
c92718_g1_i1:30:503:3:+	len=158 acc=c92718_g1_i1:30:503:3:+ pathways=MetaCyc:PWY-7219,KEGG:ec00195+3.6.3.14,KEGG:ec00190+3.6.3.14 interpro_raw=IPR027417,IPR004100 go=GO:0015992,GO:0046034 id=c92718_g1_i1:30:503:3:+ interpro_domain=IPR004100,IPR027417 def=IPR004100:ATPase, F1 complex alpha/beta subunit, N-terminal domain; IPR027417:P-loop containing nucleoside triphosphate hydrolase;	85.44	1	3	12	16	22.1617	15.745	7.01365	3.63746	16.4654	46.2	59.49	26.58	39.24	50.63	3	5	1	1	3	158	16.9575	6.53662
c101227_g4_i4:950:3235:2:+	len=762	85.43	2	2	72	90	38.1059	76.9385	70.9864	73.7927	51.0254	33.07	45.14	74.93	55.77	38.58	11	18	21	18	10	762	82.34	7.40088
c103774_g1_i4:1:599:3:+	len=199	85.43	1	1	17	19	16.7323	23.7075	8.30587	14.2625	3.28504	61.81	53.77	30.15	38.69	19.1	4	7	3	4	1	199	21.1931	9.51025
c95200_g1_i2:1:457:2:+	len=152 acc=c95200_g1_i2:1:457:2:+ go=GO:0016020 interpro_raw=IPR008253 id=c95200_g1_i2:1:457:2:+ interpro_domain=IPR008253 def=IPR008253:Marvel domain;	85.43	2	2	11	11	21.5502	19.6919	7.87088	13.9898	4.71165	49.01	78.81	25.83	53.64	39.07	3	3	2	2	1	151	17.0419	8.27979
CL773Contig1:2423:3679:1:-	len=419 acc=CL773Contig1:2423:3679:1:- interpro_domain=IPR020841 id=CL773Contig1:2423:3679:1:- ec=2.3.1.- interpro_raw=IPR014030,IPR014031,IPR020841,IPR017568,IPR016038,IPR018201,IPR016039 interpro_family=IPR017568 go=GO:0006633,GO:0016747,GO:0008152,GO:0003824 pathways=UniPathway:UPA00094 def=IPR017568:3-oxoacyl-[acyl-carrier-protein] synthase 2; IPR020841:Polyketide synthase, beta-ketoacyl synt…	85.41	1	22	31	43	65.4783	57.7645	36.7288	28.1818	44.5837	49.52	45.93	36.6	25.12	63.4	9	9	7	3	6	418	44.3637	7.02002
CL6901Contig1:68:1690:2:+	len=541 acc=CL6901Contig1:68:1690:2:+ pathways=MetaCyc:PWY-7003,MetaCyc:PWY-7218,MetaCyc:PWY-5484,KEGG:ec00230+2.7.1.40,KEGG:ec00010+2.7.1.40,MetaCyc:PWY-7383,MetaCyc:PWY-6142,KEGG:ec00620+2.7.1.40,MetaCyc:PWY-5723,MetaCyc:PWY-6901,MetaCyc:PWY-6886,UniPathway:UPA00109,MetaCyc:PWY-1042,MetaCyc:PWY-2221 interpro_raw=IPR015813,IPR015794,IPR015793,IPR015795,IPR001697,IPR011037,IPR015806 go=GO:0004743…	85.37	1	2	12	14	14.6835			20.8337	29.9974	25	0	0	25.74	44.07	3			3	6	540	59.8976	6.06201
c88374_g1_i1:136:506:1:+	len=123	85.37	1	6	9	10	3.04155	14.2513	6.9051		18.1332	36.59	85.37	35.77		55.28	1	4	1		4	123	13.3788	4.95752
c94762_g1_i1:60:1190:3:+	len=377 acc=c94762_g1_i1:60:1190:3:+ interpro_family=IPR004000 interpro_raw=IPR020902,IPR004000,IPR004001 id=c94762_g1_i1:60:1190:3:+ def=IPR004000:Actin family;	85.37	1	13	38	94	31.9766	78.3689	96.4829	118.268	22.9436	29.79	55.05	45.48	42.55	27.93	6	12	16	15	4	376	41.8758	5.38916
c102324_g4_i1:700:2850:1:+	len=717 acc=c102324_g4_i1:700:2850:1:+ interpro_raw=IPR009818,IPR009604 interpro_domain=IPR009604,IPR009818 id=c102324_g4_i1:700:2850:1:+ def=IPR009604:LsmAD domain; IPR009818:Ataxin-2, C-terminal;	85.34	2	91	106	138	121.12	125.085	143.919	75.6058	69.5015	68.72	67.46	47.63	44.27	38.83	27	33	25	21	13	716	78.9144	8.48486
CL8174Contig1:754:981:1:+	len=76	85.33	1	1	5	8	9.68957	24.0439	6.10312	5.3917		58.67	85.33	45.33	78.67	0	2	1	1	1		75	8.43714	12.2642
c113789_g1_i1:1:228:2:+	len=75 acc=c113789_g1_i1:1:228:2:+ interpro_raw=IPR000905 interpro_domain=IPR000905 id=c113789_g1_i1:1:228:2:+ def=IPR000905:Gcp-like domain;	85.33	1	1	1	1					4.3893				0	85.33					1	75	8.25807	4.75439
c99413_g2_i1:1:636:3:+	len=211	85.31	1	1	16	18	25.6183	18.8937	18.3033	4.68653	13.5898	41.71	52.61	74.41	18.01	39.81	5	4	5	1	3	211	22.139	4.70361
c113671_g1_i1:1:206:3:+	len=68 acc=c113671_g1_i1:1:206:3:+ interpro_raw=IPR009846 interpro_family=IPR009846 id=c113671_g1_i1:1:206:3:+ def=IPR009846:Splicing factor 3B subunit 5/RDS3 complex subunit 10;	85.29	1	4	6	6	2.60871	11.0663		2.93828	10.4848	33.82	60.29	0	61.76	75	1	2		1	2	68	7.87482	9.78857
c77174_g1_i1:1:107:3:+	len=35	85.29	1	1	2	2	3.03172	3.54061				70.59	76.47	0			1	1				34	3.68394	10.2866
c83828_g1_i1:1:510:1:+	len=170	85.29	1	2	4	4	7.36841		4.04381	4.23337		40.59	0	64.12	15.29	0	1		2	1		170	18.275	5.09717
c99544_g1_i1:139:1038:1:+	len=300 acc=c99544_g1_i1:139:1038:1:+ go=GO:0016020 interpro_family=IPR001107 interpro_raw=IPR001107,IPR000163 id=c99544_g1_i1:139:1038:1:+ def=IPR001107:Band 7 protein;	85.28	2	15	17	20	11.4988	17.8641	11.7863	28.3471	29.6067	30.77	27.42	30.77	37.46	54.52	2	3	3	5	5	299	33.3017	9.65674
CL7743Contig1:187:2124:1:+	len=646 acc=CL7743Contig1:187:2124:1:+ id=CL7743Contig1:187:2124:1:+ interpro_family=IPR022440 interpro_raw=IPR002035,IPR013694 def=IPR022440:Conserved hypothetical protein CHP03788;	85.27	1	2	46	55	65.7814	81.6232	20.1039	48.045	125.034	45.58	57.21	25.58	50.85	59.38	8	15	4	7	16	645	72.0103	7.32764
c89354_g3_i1:53:622:2:+	len=190 acc=c89354_g3_i1:53:622:2:+ go=GO:0005524,GO:0004672,GO:0006468 interpro_raw=IPR011009,IPR000719,IPR008271 id=c89354_g3_i1:53:622:2:+ interpro_domain=IPR011009 def=IPR011009:Protein kinase-like domain;	85.26	1	5	15	15	5.75673	11.7698	9.6073	4.95981	18.4678	26.32	58.95	42.11	15.26	47.37	2	5	2	2	4	190	20.9424	8.88037
c104502_g2_i1:1398:1686:2:-	len=96	85.26	1	1	2	2		13.6591					85.26					2				95	11.0476	7.1665
c98788_g1_i9:60:245:3:+	len=62	85.25	1	1	5	5			8.60546		6.11064	0	0	67.21		85.25			3		2	61	6.37716	7.18115
c96482_g1_i1:1:1160:1:+	len=386 acc=c96482_g1_i1:1:1160:1:+ go=GO:0003824,GO:0005975,GO:0043169 interpro_family=IPR015902 interpro_raw=IPR013780,IPR013781,IPR006046,IPR006048,IPR015902,IPR006589,IPR006047,IPR017853 pathways=KEGG:ec00500+3.2.1.1 id=c96482_g1_i1:1:1160:1:+ interpro_domain=IPR006589 def=IPR006589:Glycosyl hydrolase, family 13, subfamily, catalytic domain; IPR015902:Glycoside hydrolase, family 13;	85.23	3	4	12	12	30.4418		16.0622	6.12617	16.399	59.33	0	25.39	16.06	32.9	5		3	1	3	386	43.3441	6.354
c105822_g3_i5:2704:2970:1:+	len=89	85.23	1	1	3	3		9.92239		11.6099			59.09		68.18			2		1		88	9.83014	10.1987
CL925Contig2:370:981:1:+	len=204 acc=CL925Contig2:370:981:1:+ interpro_family=IPR005366 interpro_raw=IPR005366 id=CL925Contig2:370:981:1:+ def=IPR005366:Uncharacterised protein family UPF0172;	85.22	1	1	8	8	8.33097	8.18025	5.59473	14.3623		38.42	40.89	48.77	42.36		1	2	2	3		203	22.5713	5.10986
c104840_g1_i1:186:1790:3:+	len=535 acc=c104840_g1_i1:186:1790:3:+ ec=3.1.3.41 id=c104840_g1_i1:186:1790:3:+ go=GO:0016791,GO:0003824,GO:0008152 interpro_family=IPR001952 interpro_raw=IPR017849,IPR017850,IPR018299,IPR001952 pathways=KEGG:ec00790+3.1.3.1,MetaCyc:PWY-5491,KEGG:ec00627+3.1.3.1 def=IPR001952:Alkaline phosphatase;	85.21	1	1	24	29	15.147	48.4308	33.7685	4.43283	12.6456	32.02	65.92	32.21	10.86	26.78	4	9	5	2	4	534	59.5742	6.66846
c97879_g1_i1:73:501:1:+	len=143 acc=c97879_g1_i1:73:501:1:+ interpro_family=IPR001684 go=GO:0005622,GO:0005840,GO:0003735,GO:0006412 interpro_raw=IPR001684 id=c97879_g1_i1:73:501:1:+ def=IPR001684:Ribosomal protein L27;	85.21	1	5	11	16	17.941	6.18547	4.44753	9.58043	53.0466	51.41	40.14	47.18	50	57.04	2	2	2	2	5	142	16.1456	10.5503
c43560_g2_i1:1:589:2:+	len=196 acc=c43560_g2_i1:1:589:2:+ id=c43560_g2_i1:1:589:2:+ interpro_domain=IPR027413 go=GO:0005524,GO:0006457,GO:0005737 interpro_family=IPR002423 interpro_raw=IPR017998,IPR018370,IPR027413,IPR002423 def=IPR002423:Chaperonin Cpn60/TCP-1 family; IPR027413:GroEL-like equatorial domain;	85.2	1	1	17	25	32.5533	13.5501	32.2772	25.2717	9.84799	69.39	36.22	38.78	57.65	20.92	6	3	6	4	2	196	20.3843	5.09717
c58433_g1_i1:1:245:1:+	len=81 acc=c58433_g1_i1:1:245:1:+ id=c58433_g1_i1:1:245:1:+ interpro_domain=IPR020683 go=GO:0005515 interpro_raw=IPR020683,IPR002110 def=IPR020683:Ankyrin repeat-containing domain;	85.19	1	1	8	8	9.97041		7.1683		8.71789	48.15	0	55.56	0	85.19	2		3		3	81	8.28943	7.66455
c98667_g1_i2:631:1341:1:+	len=237 acc=c98667_g1_i2:631:1341:1:+ id=c98667_g1_i2:631:1341:1:+ interpro_family=IPR006214 go=GO:0016021,GO:0043066 interpro_raw=IPR006214,IPR006213 def=IPR006214:Bax inhibitor 1-related;	85.17	2	1	31	40	57.6165	39.0438	19.5912	39.3708	80.5222	74.15	65.68	54.24	58.47	60.17	9	6	4	5	9	236	25.9128	9.12939
c87987_g1_i1:62:283:2:+	len=74	85.14	1	5	6	6	5.35441		4.73316		2.84076	56.76		58.11	0	18.92	3		1		2	74	8.21414	9.92041
c87826_g2_i1:1:567:1:+	len=189 acc=c87826_g2_i1:1:567:1:+ interpro_raw=IPR012677,IPR000504 go=GO:0000166,GO:0003676 interpro_domain=IPR012677 id=c87826_g2_i1:1:567:1:+ def=IPR012677:Nucleotide-binding alpha-beta plait domain;	85.11	1	2	20	33	16.4899	16.279	24.6925	61.1961	20.3438	84.04	51.6	51.6	84.57	60.64	5	3	5	10	3	188	20.4658	7.1958
c94474_g3_i1:68:551:2:+	len=161 acc=c94474_g3_i1:68:551:2:+ id=c94474_g3_i1:68:551:2:+ interpro_domain=IPR009057 interpro_raw=IPR007889,IPR009057 go=GO:0003677 def=IPR009057:Homeodomain-like;	85.09	1	1	5	5	9.41843	6.82381	4.65086			66.46	40.37	24.84	0	0	3	1	1			161	17.6	5.59229
c99020_g1_i5:237:1406:3:+	len=390 acc=c99020_g1_i5:237:1406:3:+ interpro_raw=IPR015422,IPR015421,IPR000277,IPR015424 go=GO:0030170,GO:0003824 interpro_family=IPR000277 id=c99020_g1_i5:237:1406:3:+ interpro_domain=IPR015424 def=IPR000277:Cys/Met metabolism, pyridoxal phosphate-dependent enzyme; IPR015424:Pyridoxal phosphate-dependent transferase;	85.09	1	2	15	19	8.72887	17.4115	11.9061	22.307		15.42	45.24	38.05	45.5	0	1	5	4	5		389	43.278	6.80029
CL3610Contig1:1:726:1:+	len=242 acc=CL3610Contig1:1:726:1:+ go=GO:0006810,GO:0016021,GO:0005337 interpro_family=IPR002259 interpro_raw=IPR002259 pathways= id=CL3610Contig1:1:726:1:+ def=IPR002259:Equilibrative nucleoside transporter;	85.06	1	5	16	22	37.4847	28.6593	22.0282	10.0678	6.2263	45.23	67.63	53.11	12.45	25.31	5	7	3	2	2	241	26.927	8.70459
c94988_g1_i1:234:1622:3:+	len=463 acc=c94988_g1_i1:234:1622:3:+ interpro_family=IPR004539,IPR004541 go=GO:0003924,GO:0005737,GO:0005525,GO:0006414,GO:0003746 interpro_raw=IPR027417,IPR004539,IPR009001,IPR000795,IPR031157,IPR004160,IPR009000,IPR004161 interpro_domain=IPR027417 id=c94988_g1_i1:234:1622:3:+ def=IPR004539:Translation elongation factor EF1A, eukaryotic/archaeal; IPR004541:Translation elongation factor EFTu/EF1…	85.06	1	42	67	352	517.972	320.697	309.711	353.402	273.568	53.25	55.41	64.29	53.46	20.78	32	30	30	32	12	462	50.3124	9.1001
c105352_g1_i6:2654:3856:2:+	len=401 acc=c105352_g1_i6:2654:3856:2:+ id=c105352_g1_i6:2654:3856:2:+ interpro_domain=IPR009071 interpro_raw=IPR009071 def=IPR009071:High mobility group box domain;	85	2	1	22	27	44.3903	20.0348	24.3478	23.6797	10.0001	57.25	45.25	39.5	37.25	27	10	4	4	4	3	400	44.0486	5.75732
c97987_g1_i1:429:731:3:+	len=101 acc=c97987_g1_i1:429:731:3:+ id=c97987_g1_i1:429:731:3:+ interpro_family=IPR012464 interpro_raw=IPR012464 def=IPR012464:Protein of unknown function DUF1676;	85	1	1	2	3		5.51762	1.34018	1.46927		0	85	12	12			1	1	1		100	11.2405	4.84326
c98011_g1_i5:54:1136:3:+	len=361 acc=c98011_g1_i5:54:1136:3:+ id=c98011_g1_i5:54:1136:3:+ interpro_domain=IPR013320 interpro_raw=IPR001079,IPR013320 go=GO:0030246 def=IPR013320:Concanavalin A-like lectin/glucanase domain;	85	1	1	23	26	38.7376	14.4677	20.2952	19.9025	54.2969	52.22	36.11	52.22	28.89	57.78	5	4	3	4	9	360	39.7513	7.07861
c102253_g6_i1:111:233:3:+	len=41	85	1	1	1	1		4.45538					85					1				40	4.11121	6.55127
c104976_g1_i1:86:1147:2:+	len=354 acc=c104976_g1_i1:86:1147:2:+ interpro_raw=IPR005302,IPR011037,IPR005303,IPR015808 go=GO:0030170,GO:0030151,GO:0003824 id=c104976_g1_i1:86:1147:2:+ interpro_domain=IPR005302,IPR011037 def=IPR005302:Molybdenum cofactor sulfurase, C-terminal; IPR011037:Pyruvate kinase-like, insert domain;	84.99	1	7	10	11	3.57301	17.391	5.08865	9.31097	7.24765	44.76	40.23	18.7	5.1	18.13	3	2	2	1	2	353	40.2439	8.33838
c103275_g1_i6:1713:3590:3:+	len=626 acc=c103275_g1_i6:1713:3590:3:+ id=c103275_g1_i6:1713:3590:3:+ interpro_domain=IPR016024 interpro_raw=IPR011989,IPR016024,IPR001313 go=GO:0005488,GO:0003723 def=IPR016024:Armadillo-type fold;	84.98	3	1	93	107	156.584	114.246	83.9424	76.3213	137.846	82.11	60.22	49.2	61.66	53.51	25	22	18	16	21	626	68.8492	8.76318
c83811_g1_i1:25:425:1:+	len=133 acc=c83811_g1_i1:25:425:1:+ interpro_raw=IPR020846 interpro_domain=IPR020846 id=c83811_g1_i1:25:425:1:+ def=IPR020846:Major facilitator superfamily domain;	84.96	1	6	8	9	7.615	4.4341	16.7252	4.27633		36.09	78.2	67.67	42.11	0	2	2	3	1		133	14.4111	4.7417
c88060_g4_i1:32:371:2:+	len=113 acc=c88060_g4_i1:32:371:2:+ ec=3.6.1.- id=c88060_g4_i1:32:371:2:+ interpro_family=IPR009283 go=GO:0016462,GO:0005509 interpro_raw=IPR009283 def=IPR009283:Apyrase;	84.96	1	10	13	17	24.4308	8.14809	9.46793	5.99572	11.9444	68.14	62.83	29.2	27.43	61.95	6	3	2	2	2	113	12.4474	6.07471
c90202_g2_i1:1:559:1:+	len=186 acc=c90202_g2_i1:1:559:1:+ id=c90202_g2_i1:1:559:1:+ interpro_domain=IPR017452 interpro_raw=IPR017452,IPR000276 go=GO:0004930,GO:0016021,GO:0007186 interpro_family=IPR000276 pathways= def=IPR000276:G protein-coupled receptor, rhodopsin-like; IPR017452:GPCR, rhodopsin-like, 7TM;	84.95	1	2	16	20	21.9931	10.9842	19.7169	11.8489	40.6254	45.16	26.88	44.09	47.85	50.54	3	2	4	2	5	186	20.818	9.40771
c96444_g2_i1:1:622:2:+	len=207 acc=c96444_g2_i1:1:622:2:+ id=c96444_g2_i1:1:622:2:+ interpro_domain=IPR012677 interpro_raw=IPR012677,IPR000504,IPR025715 go=GO:0000166,GO:0003676 def=IPR012677:Nucleotide-binding alpha-beta plait domain; IPR025715:Friend of PRMT1 duplication;	84.95	2	2	23	26	8.51309	26.5884	44.8839	16.6925	73.1456	37.38	47.09	39.81	67.48	55.34	2	4	7	3	9	206	22.5347	10.9019
c103396_g1_i5:1:940:2:+	len=313 acc=c103396_g1_i5:1:940:2:+ id=c103396_g1_i5:1:940:2:+ interpro_raw=IPR024880 go=GO:0048208 interpro_family=IPR024880 def=IPR024880:COPII coat assembly protein, Sec16;	84.94	1	1	24	25	13.9847	28.1507	7.12353	12.6612	38.6528	50.64	48.08	13.14	23.08	58.97	5	7	3	3	7	312	35.039	5.5415
c91834_g1_i1:1:441:1:+	len=147	84.93	1	2	8	9	7.63812			42.3311		44.52	0	0	43.84	0	1			7		146	15.8098	7.40088
c104626_g2_i2:688:849:1:+	len=54	84.91	1	1	3	3	2.97525		6.18935	5.22554		32.08		77.36	69.81		1		1	1		53	5.79005	8.22119
c98377_g1_i1:77:754:2:+	len=226	84.89	1	8	21	21	30.0909	25.4257	15.8649	14.5883	19.1643	84.89	61.78	51.11	37.33	48	6	4	3	4	4	225	26.2045	9.77393
CL6587Contig1:1679:2296:2:+	len=206 acc=CL6587Contig1:1679:2296:2:+ pathways= interpro_family=IPR011807 interpro_raw=IPR027408,IPR020568,IPR015847,IPR001247 id=CL6587Contig1:1679:2296:2:+ interpro_domain=IPR027408 def=IPR011807:Exosome complex component Rrp41; IPR027408:PNPase/RNase PH domain;	84.88	1	1	10	16	17.9617	34.5984	11.5421		15.6949	38.05	63.41	23.9		56.1	2	7	1		3	205	22.5234	5.89697
CL28Contig1:452:4153:2:+	len=1234 acc=CL28Contig1:452:4153:2:+ interpro_raw=IPR015915,IPR003961,IPR013783 go=GO:0005515 interpro_domain=IPR015915,IPR013783 id=CL28Contig1:452:4153:2:+ def=IPR013783:Immunoglobulin-like fold; IPR015915:Kelch-type beta propeller;	84.83	5	29	121	191	198.73	164.025	118.882	116.445	326.609	55.31	59.61	48.01	32.28	44.2	33	26	17	20	44	1233	132.113	8.70459
CL7155Contig1:335:771:2:+	len=145 acc=CL7155Contig1:335:771:2:+ interpro_raw=IPR029004,IPR002672 go=GO:0005622,GO:0005840,GO:0003735,GO:0006412 interpro_family=IPR002672 id=CL7155Contig1:335:771:2:+ interpro_domain=IPR029004 def=IPR002672:Ribosomal protein L28e; IPR029004:Ribosomal L28e/Mak16;	84.83	2	10	10	25		17.1876	56.9019	36.1636		0	28.97	71.03	62.07	0		2	5	6		145	16.6042	11.0776
CL8629Contig1:187:822:1:+	len=212 acc=CL8629Contig1:187:822:1:+ interpro_raw=IPR018181,IPR013126 interpro_family=IPR013126 id=CL8629Contig1:187:822:1:+ def=IPR013126:Heat shock protein 70 family;	84.83	1	2	20	22	68.4513	28.5975	5.95714	21.6909	11.7227	65.88	66.35	32.23	64.93	45.97	10	5	1	3	2	211	22.6746	5.51611
c103768_g2_i5:200:1582:2:+	len=461	84.82	1	1	33	37	37.2036	45.3968	33.8066	20.723	30.1955	52.28	61.82	65.51	41.21	38.39	9	10	7	5	5	461	49.2293	4.83057
c105924_g1_i2:798:1571:3:+	len=258 acc=c105924_g1_i2:798:1571:3:+ id=c105924_g1_i2:798:1571:3:+ interpro_family=IPR004245 go=GO:0003824,GO:0008152 interpro_raw=IPR017849,IPR017850,IPR004245 def=IPR004245:Protein of unknown function DUF229;	84.82	1	1	7	9	3.88061	11.2368	7.65624			33.85	38.13	36.96			2	3	2			257	29.5885	8.54346
c103965_g3_i6:246:740:3:+	len=165 acc=c103965_g3_i6:246:740:3:+ id=c103965_g3_i6:246:740:3:+ interpro_domain=IPR011993 interpro_raw=IPR001849,IPR011993 def=IPR011993:Pleckstrin homology-like domain;	84.76	1	1	5	7	13.3861		3.15993	3.58529	18.0287	35.37		21.34	49.39	35.37	2		1	2	1	164	19.1118	8.68994
c60402_g1_i1:1:632:2:+	len=210 acc=c60402_g1_i1:1:632:2:+ ec=1.-.-.- id=c60402_g1_i1:1:632:2:+ go=GO:0016491,GO:0055114,GO:0008152 interpro_family=IPR003767 interpro_raw=IPR003767 def=IPR003767:Malate/L-lactate dehydrogenase;	84.76	1	1	19	25	8.741	33.6551	22.9871	17.2021	17.6763	37.14	54.76	61.43	23.81	61.9	2	6	6	3	4	210	22.7325	9.20264
c83695_g1_i1:1:319:2:+	len=106 acc=c83695_g1_i1:1:319:2:+ interpro_family=IPR031107 interpro_raw=IPR031107,IPR002068,IPR001436,IPR008978 interpro_domain=IPR002068 id=c83695_g1_i1:1:319:2:+ def=IPR002068:Alpha crystallin/Hsp20 domain; IPR031107:Small heat shock protein HSP20;	84.76	1	1	16	34	12.2863	2.76901	65.0628	33.6754		75.24	18.1	77.14	38.1		3	1	12	7		105	11.8389	4.94482
c100095_g1_i4:14:193:3:-	len=60	84.75	1	3	4	5	10.3784	2.32488	2.41028		3.7926	81.36	45.76	45.76	0	66.1	2	1	1		1	59	6.40763	9.99365
c81603_g1_i1:1:532:2:+	len=177 acc=c81603_g1_i1:1:532:2:+ id=c81603_g1_i1:1:532:2:+ interpro_domain=IPR029052 ec=3.-.-.- interpro_raw=IPR029052,IPR006179 go=GO:0016787,GO:0009166 interpro_family=IPR006179 def=IPR006179:5'-Nucleotidase/apyrase; IPR029052:Metallo-dependent phosphatase-like;	84.75	1	1	7	7	9.84706	2.6868	4.96155		14.2895	54.24	26.55	25.99	0	24.29	2	1	1		3	177	18.9606	5.08447
c73566_g2_i1:1:181:2:+	len=60	84.75	1	1	3	3		3.877			7.16833		55.93			84.75		2			1	59	6.56031	4.71631
c106396_g3_i1:1:928:2:+	len=309 acc=c106396_g3_i1:1:928:2:+ id=c106396_g3_i1:1:928:2:+ interpro_domain=IPR003889 ec=2.1.1.43 interpro_raw=IPR001214,IPR015722,IPR003889,IPR003616 go=GO:0051568,GO:0005515,GO:0018024,GO:0005634 interpro_family=IPR015722 pathways=KEGG:ec00310+2.1.1.43 def=IPR003889:FY-rich, C-terminal; IPR015722:Histone-lysine N-methyltransferase Trr;	84.74	1	6	13	19	30.7802	14.0643	15.8612	21.7665	11.6075	71.75	24.03	25.65	50.32	34.09	6	2	2	3	2	308	35.6251	8.54346
CL185Contig1:380:1168:2:+	len=263 acc=CL185Contig1:380:1168:2:+ ec=3.4.21.- interpro_domain=IPR009003 id=CL185Contig1:380:1168:2:+ interpro_family=IPR001314 go=GO:0006508,GO:0004252 interpro_raw=IPR001254,IPR009003,IPR001314 def=IPR001314:Peptidase S1A, chymotrypsin-type; IPR009003:Trypsin-like cysteine/serine peptidase domain;	84.73	1	3	8	9	17.3962		2.98791	3.12899		63.74	0	30.15	36.64	0	4		2	2		262	27.967	4.62744
c109628_g1_i1:222:439:3:+	len=72	84.72	1	3	5	6		12.7746	8.14615	8.74095		0	54.17	40.28	52.78	0		3	2	1		72	7.41544	7.07861
CL646Contig1:1823:2080:3:-	len=86	84.71	1	1	2	2					10.6637	0			0	84.71					2	85	10.3386	10.9312
c98493_g2_i1:1:533:3:+	len=177 acc=c98493_g2_i1:1:533:3:+ interpro_raw=IPR003961,IPR013783 go=GO:0005515 interpro_domain=IPR013783 id=c98493_g2_i1:1:533:3:+ def=IPR013783:Immunoglobulin-like fold;	84.66	1	3	4	4	5.2279		4.03578		7.59555	34.66	0	27.27		30.11	1		2		1	176	20.6175	9.01221
c100947_g1_i1:157:1371:1:+	len=405 acc=c100947_g1_i1:157:1371:1:+ interpro_domain=IPR013087 id=c100947_g1_i1:157:1371:1:+ interpro_raw=IPR013087,IPR007087 go=GO:0046872,GO:0003676 def=IPR013087:Zinc finger C2H2-type/integrase DNA-binding domain;	84.65	1	1	26	38	31.5659	35.0034	31.8643	27.0468	32.5714	46.78	51.98	71.29	64.6	67.08	6	9	7	6	6	404	42.0277	9.0708
c73078_g1_i1:70:225:1:+	len=52 acc=c73078_g1_i1:70:225:1:+ go=GO:0016491,GO:0008152 interpro_family=IPR002198 interpro_raw=IPR016040,IPR002198 ec=1.-.-.- id=c73078_g1_i1:70:225:1:+ def=IPR002198:Short-chain dehydrogenase/reductase SDR;	84.62	1	2	2	2	6.23594			2.79878		84.62	0		50		1			1		52	5.41299	7.25439
c73558_g1_i1:108:383:3:+	len=92 acc=c73558_g1_i1:108:383:3:+ interpro_domain=IPR010992 id=c73558_g1_i1:108:383:3:+ interpro_family=IPR000119 go=GO:0003677 interpro_raw=IPR000119,IPR010992,IPR020816 def=IPR000119:Histone-like bacterial DNA-binding protein; IPR010992:Integration host factor (IHF)-like DNA-binding domain;	84.62	1	1	7	9		6.4409	23.5261	5.85328	4.52906	0	58.24	84.62	30.77	62.64		1	4	1	2	91	9.52314	9.5249
c90035_g1_i1:273:430:3:+	len=52	84.62	2	1	3	4	5.40389		1.29769	4.68537		84.62		23.08	75		1		1	1		52	5.58481	5.68115
c99386_g1_i1:1:628:2:+	len=209 acc=c99386_g1_i1:1:628:2:+ id=c99386_g1_i1:1:628:2:+ ec=1.-.-.- interpro_raw=IPR002347,IPR020904,IPR016040,IPR002198 go=GO:0016491,GO:0008152 interpro_family=IPR002347 def=IPR002347:Glucose/ribitol dehydrogenase;	84.62	1	5	15	26	40.6226	26.7748	20.2983	9.20968	14.6861	54.81	75	30.29	53.37	28.37	5	4	4	2	1	208	23.0219	7.18115
c114564_g1_i1:1:161:3:+	len=53	84.62	1	1	1	1		3.03098					84.62					1				52	5.78109	6.50732
c96975_g1_i2:99:1169:3:+	len=357 acc=c96975_g1_i2:99:1169:3:+ id=c96975_g1_i2:99:1169:3:+ interpro_raw=IPR004000,IPR027667 go=GO:0031011,GO:0006338,GO:0006281,GO:0006355,GO:0035267 interpro_family=IPR004000 def=IPR004000:Actin family;	84.55	2	13	26	31	39.7567	35.6561	59.5018	25.58	9.87774	58.43	46.07	67.98	47.19	18.26	6	9	9	4	1	356	39.6058	5.68115
CL1916Contig2:1032:1325:3:+	len=98	84.54	1	52	67	115	11.5206	43.3415	131.418	165.693	16.2986	54.64	63.92	83.51	84.54	36.08	4	21	29	26	5	97	8.52774	4.00537
c97651_g2_i1:1:293:2:+	len=97	84.54	1	1	7	27	62.4947	46.0081	38.3312	34.3224	23.3031	80.41	75.26	72.16	71.13	72.16	3	2	3	2	2	97	10.5961	5.70654
c93424_g1_i1:22:1032:1:+	len=337 acc=c93424_g1_i1:22:1032:1:+ interpro_domain=IPR025308,IPR001509 id=c93424_g1_i1:22:1032:1:+ ec=5.1.3.2 interpro_raw=IPR001509,IPR016040,IPR025308,IPR008089,IPR005886 interpro_family=IPR005886,IPR008089 go=GO:0006012,GO:0050662,GO:0005975,GO:0003824,GO:0003978,GO:0016857 pathways=MetaCyc:PWY-6317,KEGG:ec00520+5.1.3.2,KEGG:ec00052+5.1.3.2,MetaCyc:PWY-6527,MetaCyc:PWY-3821,MetaCyc:PWY-7344,…	84.52	1	1	18	19	23.4397	28.6956	6.31062	11.5507	7.73612	39.88	68.75	13.1	47.32	20.54	6	7	1	3	1	336	36.6745	7.12256
CL6652Contig1:104:493:2:+	len=130 acc=CL6652Contig1:104:493:2:+ interpro_domain=IPR001487 id=CL6652Contig1:104:493:2:+ go=GO:0005515 interpro_raw=IPR001487 def=IPR001487:Bromodomain;	84.5	1	5	8	8	5.21516		12.3896	5.60763	2.67815	40.31		58.14	45.74	27.91	1		4	2	1	129	14.538	5.19873
c91051_g1_i1:1:392:3:+	len=130 acc=c91051_g1_i1:1:392:3:+ id=c91051_g1_i1:1:392:3:+ interpro_raw=IPR007125,IPR009072,IPR002119 go=GO:0005634,GO:0003677,GO:0046982,GO:0000786 interpro_family=IPR021171 def=IPR021171:Core histone macro-H2A;	84.5	1	1	10	12	24.8472		5.47996	15.6075	16.3611	54.26	0	41.09	78.29	56.59	4		1	3	3	129	13.5155	10.0522
c94371_g2_i2:1:911:3:+	len=303 acc=c94371_g2_i2:1:911:3:+ = interpro_raw=IPR018108,IPR023395 id=c94371_g2_i2:1:911:3:+ interpro_domain=IPR023395 def=IPR023395:Mitochondrial carrier domain;	84.44	1	1	14	14	26.1297		9.83389	7.33891	20.6969	70.2	0	25.83	24.17	41.72	5		3	2	4	302	33.3861	9.36377
c99787_g1_i2:673:1485:1:+	len=271 acc=c99787_g1_i2:673:1485:1:+ interpro_raw=IPR018108,IPR002067,IPR023395 interpro_family=IPR002067 go=GO:0055085 interpro_domain=IPR023395 id=c99787_g1_i2:673:1485:1:+ def=IPR002067:Mitochondrial carrier protein; IPR023395:Mitochondrial carrier domain;	84.44	1	13	39	55	84.0637	51.5921	64.2051	31.7196	115.732	54.07	52.96	52.59	48.89	52.59	11	9	9	4	11	270	29.4551	8.04541
CL1805Contig1:878:1246:1:-	len=123	84.43	1	2	7	15	12.0146		46.9598	60.002	1.56434	56.56	0	70.49	74.59	9.84	1		4	4	1	122	12.7988	3.94189
c12579_g1_i1:1:371:3:+	len=123	84.43	1	1	10	10	10.8702	2.36775	23.6524	3.77089	3.99765	74.59	17.21	63.11	25.41	26.23	2	1	5	1	1	122	13.7208	6.62451
c71653_g1_i1:1:366:1:+	len=122	84.43	1	1	9	14		11.7965	18.3758	32.5799	17.6238		63.11	42.62	42.62	84.43		2	2	3	3	122	12.5883	10.9458
CL6490Contig1:216:1046:3:+	len=277 acc=CL6490Contig1:216:1046:3:+ interpro_raw=IPR012677,IPR000504 go=GO:0000166,GO:0003676 interpro_domain=IPR012677 id=CL6490Contig1:216:1046:3:+ def=IPR012677:Nucleotide-binding alpha-beta plait domain;	84.42	2	9	24	33	56.2091	30.8051	18.7377	23.7105	24.827	68.12	33.33	21.38	39.13	53.62	9	6	4	5	5	276	29.4144	9.72998
c102548_g1_i3:136:1659:1:+	len=508 acc=c102548_g1_i3:136:1659:1:+ id=c102548_g1_i3:136:1659:1:+ ec=1.14.-.- pathways= interpro_raw=IPR017972,IPR001128,IPR002401 go=GO:0055114,GO:0016705,GO:0020037,GO:0005506 interpro_family=IPR001128 def=IPR001128:Cytochrome P450;	84.42	4	4	29	51	43.7386	58.9597	21.5239	50.3799	33.3284	37.67	63.12	41.62	53.65	25.05	9	12	5	9	4	507	58.5281	8.83643
c97710_g1_i6:1:330:1:+	len=110 acc=c97710_g1_i6:1:330:1:+ interpro_raw=IPR009003,IPR001254 go=GO:0004252,GO:0006508 id=c97710_g1_i6:1:330:1:+ interpro_domain=IPR009003 ec=3.4.21.- def=IPR009003:Trypsin-like cysteine/serine peptidase domain;	84.4	1	1	3	3	3.85521	7.22104				32.11	66.06				1	2				109	12.483	4.98291
c104011_g1_i1:1:523:2:+	len=174 acc=c104011_g1_i1:1:523:2:+ interpro_family=IPR019729 go=GO:0005576 interpro_raw=IPR019729,IPR005521 interpro_domain=IPR005521 id=c104011_g1_i1:1:523:2:+ def=IPR005521:Attacin, C-terminal; IPR019729:Gloverin-like protein;	84.39	1	11	37	84	141.719		8.30037	202.478	9.57066	43.35		30.06	63.58	23.12	16		2	23	2	173	19.0586	8.86572
CL605Contig2:258:509:3:+	len=84 acc=CL605Contig2:258:509:3:+ id=CL605Contig2:258:509:3:+ go=GO:0005622,GO:0005840,GO:0003735,GO:0006412 interpro_family=IPR001931 interpro_raw=IPR001931,IPR018279 def=IPR001931:Ribosomal protein S21e;	84.34	3	8	8	15	23.8623	6.56464	10.6488	11.7998	4.63933	30.12	54.22	54.22	31.33	31.33	3	2	2	2	1	83	9.20053	7.21045
c102737_g1_i1:113:1705:2:+	len=531 acc=c102737_g1_i1:113:1705:2:+ id=c102737_g1_i1:113:1705:2:+ interpro_domain=IPR027413,IPR027409,IPR027410 interpro_raw=IPR017998,IPR027413,IPR012722,IPR027409,IPR002194,IPR002423,IPR027410 go=GO:0006457,GO:0051082,GO:0005524 interpro_family=IPR002423,IPR012722 pathways= def=IPR002423:Chaperonin Cpn60/TCP-1 family; IPR012722:T-complex protein 1, zeta subunit; IPR027409:GroEL-like apical d…	84.34	1	41	48	52	57.4714	55.4884	17.2336	31.6864	75.6968	42.45	52.08	19.25	32.64	71.51	13	13	4	9	12	530	57.8144	7.10791
c105689_g1_i1:2576:3343:2:+	len=256 acc=c105689_g1_i1:2576:3343:2:+ interpro_raw=IPR006576 go=GO:0005515,GO:0016817 interpro_domain=IPR006576 id=c105689_g1_i1:2576:3343:2:+ ec=3.6.-.- def=IPR006576:BRK domain;	84.31	1	20	62	82	134.282	42.2279	121.887	33.0445	84.6136	56.86	58.04	56.86	66.27	58.04	19	10	19	7	14	255	27.058	9.81787
c83033_g1_i1:1:630:1:+	len=210 acc=c83033_g1_i1:1:630:1:+ id=c83033_g1_i1:1:630:1:+ interpro_raw=IPR003409 = def=IPR003409:MORN motif;	84.29	1	1	6	6		14.3473	4.34182				55.71	42.38	0			3	3			210	23.2302	5.93506
c79230_g1_i1:1:271:3:+	len=89 acc=c79230_g1_i1:1:271:3:+ interpro_domain=IPR004853 id=c79230_g1_i1:1:271:3:+ interpro_raw=IPR004853 def=IPR004853:Triose-phosphate transporter domain;	84.27	1	2	8	8	18.6996	5.92197		5.14765	4.75028	84.27	52.81		29.21	58.43	4	1		2	1	89	9.79712	9.30518
c100517_g1_i3:136:1644:1:+	len=503 acc=c100517_g1_i3:136:1644:1:+ ec=2.3.1.- interpro_domain=IPR016039,IPR012336 id=c100517_g1_i3:136:1644:1:+ interpro_family=IPR002155,IPR008554 go=GO:0016747,GO:0008152,GO:0003824 interpro_raw=IPR012336,IPR020615,IPR020613,IPR002155,IPR020617,IPR008554,IPR020616,IPR020610,IPR016038,IPR016039 pathways= def=IPR002155:Thiolase; IPR008554:Glutaredoxin-like; IPR012336:Thioredoxin-like fold; IP…	84.26	3	28	31	39	40.6545	30.6919	28.366	32.3836	65.6699	49.2	26.29	47.81	33.27	41.24	8	6	7	4	9	502	54.2032	8.48486
c103620_g1_i6:188:514:2:+	len=109 acc=c103620_g1_i6:188:514:2:+ interpro_raw=IPR029021 id=c103620_g1_i6:188:514:2:+ interpro_domain=IPR029021 def=IPR029021:Protein-tyrosine phosphatase-like;	84.26	1	2	7	8	1.99178	34.7511	2.52743		1.9037	12.96	80.56	25	0	11.11	1	4	1		1	108	11.8368	8.49951
c84466_g1_i1:1:764:2:+	len=254	84.25	1	8	23	32	5.23467	22.7317	45.133	115.511	12.623	17.32	55.51	44.88	39.76	41.34	1	5	5	8	5	254	26.4415	8.77783
c85922_g2_i1:1:763:2:+	len=254 acc=c85922_g2_i1:1:763:2:+ pathways= go=GO:0006869,GO:0005319 interpro_raw=IPR001747,IPR015816,IPR015819 id=c85922_g2_i1:1:763:2:+ interpro_domain=IPR001747 def=IPR001747:Lipid transport protein, N-terminal;	84.25	1	128	130	544	893.777	590.932	151.645	169.204	256.11	77.56	83.07	57.87	57.87	59.84	87	86	25	24	32	254	28.8868	5.19873
c110701_g1_i1:381:836:3:+	len=152 acc=c110701_g1_i1:381:836:3:+ id=c110701_g1_i1:381:836:3:+ interpro_domain=IPR012960 ec=5.4.99.12 interpro_raw=IPR002501,IPR012960,IPR004802,IPR020103 go=GO:0001522,GO:0009982,GO:0006396,GO:0003723,GO:0009451 interpro_family=IPR002501 def=IPR002501:Pseudouridine synthase II; IPR012960:Dyskerin-like;	84.21	1	3	6	8	35.6154		3.5078		11.924	75.66	0	15.79		55.92	3		1		2	152	16.4348	9.5249
c98541_g1_i1:1:345:2:+	len=114	84.21	1	4	7	8	22.2379	3.12134			13.931	84.21	36.84			71.05	4	1			3	114	12.8495	5.73193
c98566_g4_i1:1:914:3:+	len=304 acc=c98566_g4_i1:1:914:3:+ interpro_domain=IPR020683,IPR000906 id=c98566_g4_i1:1:914:3:+ go=GO:0005515 interpro_raw=IPR000906,IPR002110,IPR020683 def=IPR000906:ZU5 domain; IPR020683:Ankyrin repeat-containing domain;	84.21	1	1	15	16	20.1035	29.1575	24.1793	20.5427	16.3697	29.93	65.79	57.89	63.49	28.62	2	5	4	3	1	304	33.3397	6.22705
c99048_g1_i4:243:1385:3:+	len=381 acc=c99048_g1_i4:243:1385:3:+ interpro_domain=IPR015943 id=c99048_g1_i4:243:1385:3:+ go=GO:0005515 interpro_raw=IPR015943,IPR017986,IPR001680,IPR019775 def=IPR015943:WD40/YVTN repeat-like-containing domain;	84.21	1	0	21	25	25.0981	35.9697	32.7236	15.6355	5.09767	28.95	54.47	60	31.05	20.53	5	7	4	4	3	380	41.8419	6.13818
c104234_g2_i15:1016:4303:2:+	len=1096 acc=c104234_g2_i15:1016:4303:2:+ pathways= interpro_raw=IPR017426 interpro_family=IPR017426 id=c104234_g2_i15:1016:4303:2:+ def=IPR017426:Nuclear receptor coactivator;	84.2	2	15	87	117	81.4754	109.211	117.722	223.073	112.02	49.04	53.42	33.61	54.61	46.67	13	19	22	23	21	1095	119.309	7.31299
c23149_g1_i1:1:249:2:+	len=82 acc=c23149_g1_i1:1:249:2:+ id=c23149_g1_i1:1:249:2:+ interpro_domain=IPR002687 interpro_raw=IPR002687 def=IPR002687:Nop domain;	84.15	1	2	6	7	11.1426	5.68958	4.56655		3.01511	54.88	78.05	52.44		73.17	2	3	1		1	82	9.03695	9.87646
c94688_g1_i2:566:1117:2:+	len=184 acc=c94688_g1_i2:566:1117:2:+ id=c94688_g1_i2:566:1117:2:+ interpro_family=IPR004031 go=GO:0016021 interpro_raw=IPR004031,IPR026748 def=IPR004031:PMP-22/EMP/MP20/Claudin superfamily;	84.15	2	2	14	14	17.2037		26.2792	17.6721	33.3882	39.34	0	38.8	39.34	80.87	3		3	2	6	183	20.5996	8.41162
c97137_g1_i1:96:722:3:+	len=209 acc=c97137_g1_i1:96:722:3:+ interpro_raw=IPR005225,IPR003578,IPR020849,IPR027417,IPR002041,IPR003579,IPR001806,IPR024156 interpro_family=IPR024156,IPR001806,IPR002041 go=GO:0016020,GO:0005525,GO:0015031,GO:0007165,GO:0006886,GO:0003924,GO:0006913,GO:0007264,GO:0005622 pathways= interpro_domain=IPR027417 id=c97137_g1_i1:96:722:3:+ def=IPR001806:Small GTPase superfamily; IPR002041:Ran GTPas…	84.13	2	1	8	11	19.0127	3.78539	11.7081	3.56072	6.47716	42.31	42.79	43.27	26.92	16.35	4	2	3	1	1	208	23.8224	8.88037
c61470_g1_i1:188:376:2:+	len=63	84.13	1	2	3	3		16.288					84.13					3				63	6.9462	11.3267
c94512_g4_i2:105:1184:3:+	len=360 acc=c94512_g4_i2:105:1184:3:+ go=GO:0003676,GO:0046872 interpro_raw=IPR007087,IPR013087 interpro_domain=IPR013087 id=c94512_g4_i2:105:1184:3:+ def=IPR013087:Zinc finger C2H2-type/integrase DNA-binding domain;	84.12	1	2	21	25	30.0433	26.1293	34.2957	31.2272	14.612	47.35	39.55	39.28	57.66	28.13	7	4	4	5	3	359	38.8216	6.7124
c94369_g1_i1:44:499:2:+	len=152 acc=c94369_g1_i1:44:499:2:+ pathways=MetaCyc:PWY-7224,MetaCyc:PWY-7221,MetaCyc:PWY-7226,MetaCyc:PWY-7210,MetaCyc:PWY-7184,MetaCyc:PWY-7220,KEGG:ec00240+2.7.4.6,MetaCyc:PWY-7222,MetaCyc:PWY-7205,KEGG:ec00230+2.7.4.6,MetaCyc:PWY-7198,MetaCyc:PWY-7187,MetaCyc:PWY-7227,MetaCyc:PWY-7176,MetaCyc:PWY-7197,MetaCyc:PWY-6545 go=GO:0006241,GO:0006183,GO:0005524,GO:0006228,GO:0006165,GO:0004550 inter…	84.11	1	1	7	7		29.2773		12.3046	3.65629	0	84.11	0	54.97	25.17		4		2	1	151	16.9316	6.81494
c101374_g1_i6:111:1037:3:+	len=309	84.09	1	22	50	58	67.8646	60.188	42.3128	10.2674	48.4376	49.03	76.3	49.35	18.83	32.47	14	17	11	3	9	308	32.3113	5.17334
c104686_g1_i5:93:1580:3:+	len=496 acc=c104686_g1_i5:93:1580:3:+ interpro_raw=IPR020845,IPR000873 go=GO:0003824,GO:0008152 interpro_domain=IPR000873 id=c104686_g1_i5:93:1580:3:+ def=IPR000873:AMP-dependent synthetase/ligase;	84.07	2	3	31	35	36.7002	24.346	13.3746	19.5427	85.4957	30.44	42.34	11.29	38.51	31.05	6	6	2	5	13	496	55.5863	6.97607
c91829_g2_i1:39:378:3:+	len=113 acc=c91829_g2_i1:39:378:3:+ id=c91829_g2_i1:39:378:3:+ interpro_domain=IPR001223,IPR029070 ec=3.2.1.- interpro_raw=IPR029070,IPR001223 go=GO:0005975,GO:0004553 def=IPR001223:Glycoside hydrolase, family 18, catalytic domain; IPR029070:Chitinase insertion domain;	84.07	1	1	2	5	11.0633	22.0678				84.07	84.07	0	0	0	2	2				113	12.458	6.55127
c93856_g1_i1:1:340:2:+	len=113 acc=c93856_g1_i1:1:340:2:+ go=GO:0004559,GO:0003824,GO:0005975 interpro_raw=IPR011330,IPR000602,IPR027291 ec=3.2.1.24 interpro_domain=IPR011330,IPR000602 id=c93856_g1_i1:1:340:2:+ def=IPR000602:Glycoside hydrolase family 38, N-terminal domain; IPR011330:Glycoside hydrolase/deacetylase, beta/alpha-barrel;	84.07	1	1	3	3	2.60243		3.5864			50.44		33.63	0		2		1			113	13.0506	5.21143
c92139_g1_i1:195:686:3:+	len=164 acc=c92139_g1_i1:195:686:3:+ id=c92139_g1_i1:195:686:3:+ interpro_domain=IPR002715 interpro_raw=IPR002715 def=IPR002715:Nascent polypeptide-associated complex NAC domain;	84.05	1	14	16	26	18.7887	13.4544	18.8966	32.8113	15.8848	44.79	41.72	55.83	70.55	42.33	3	4	5	5	3	163	17.7584	8.29443
c102317_g12_i3:1:286:2:+	len=95	84.04	1	1	4	5		15.1108	3.20647	4.41312		0	79.79	38.3	36.17			3	1	1		94	10.4102	8.67529
c82401_g2_i1:2:586:2:+	len=195 acc=c82401_g2_i1:2:586:2:+ id=c82401_g2_i1:2:586:2:+ interpro_raw=IPR013845,IPR000876 interpro_family=IPR000876 go=GO:0006412,GO:0003735,GO:0005840,GO:0005622 def=IPR000876:Ribosomal protein S4e;	84.02	1	12	20	28	47.8382	11.1536	17.8748	15.1201	59.788	62.37	46.91	32.47	28.87	75.26	8	3	2	2	9	194	21.7668	9.99365
c93659_g1_i1:1:661:2:+	len=220 acc=c93659_g1_i1:1:661:2:+ ec=1.1.1.- interpro_domain=IPR001732,IPR029058 id=c93659_g1_i1:1:661:2:+ go=GO:0008236,GO:0016616,GO:0006508,GO:0051287,GO:0055114 interpro_raw=IPR001732,IPR001375,IPR029058 def=IPR001732:UDP-glucose/GDP-mannose dehydrogenase, N-terminal; IPR029058:Alpha/Beta hydrolase fold;	84.02	1	2	6	6		7.66953	5.5884		15.237		56.16	36.99		29.68		2	2		2	219	25.3387	7.10791
c98122_g1_i1:164:691:2:+	len=176 acc=c98122_g1_i1:164:691:2:+ id=c98122_g1_i1:164:691:2:+ interpro_family=IPR009511 go=GO:0007096,GO:0005634 interpro_raw=IPR009511 def=IPR009511:Mad1/Cdc20-bound-Mad2 binding protein;	84	2	1	4	8	4.21466	11.9111			13.7401	23.43	46.29			22.29	1	2			1	175	20.1433	8.57275
c103138_g1_i1:512:2215:2:+	len=568 acc=c103138_g1_i1:512:2215:2:+ interpro_domain=IPR001846 id=c103138_g1_i1:512:2215:2:+ interpro_raw=IPR001846 def=IPR001846:von Willebrand factor, type D domain;	83.95	1	424	428	2867	3470.98	3229.61	2568.15	3073.48	1672.38	73.19	70.37	74.07	69.31	57.32	164	191	227	253	92	567	63.98	7.94287
c98172_g1_i4:451:2190:1:+	len=580 acc=c98172_g1_i4:451:2190:1:+ = interpro_raw=IPR001611,IPR025875,IPR005135,IPR003591 go=GO:0005515 id=c98172_g1_i4:451:2190:1:+ interpro_domain=IPR005135 def=IPR005135:Endonuclease/exonuclease/phosphatase;	83.94	3	2	24	25	21.6704	13.9224	31.8923	14.2098	16.067	27.29	29.36	34.89	23.49	39.21	5	4	8	3	5	579	65.9982	6.90283
c98019_g2_i2:704:874:2:+	len=57	83.93	1	2	4	4	2.61447		7.8454	2.93039		55.36		82.14	75	0	1		2	1		56	6.54031	7.34229
c104287_g1_i5:781:2070:1:+	len=430 acc=c104287_g1_i5:781:2070:1:+ interpro_family=IPR002213 go=GO:0016758,GO:0008152 interpro_raw=IPR002213 ec=2.4.1.- id=c104287_g1_i5:781:2070:1:+ def=IPR002213:UDP-glucuronosyl/UDP-glucosyltransferase;	83.92	1	5	28	38	54.1171	13.718	25.3116	24.2705	59.4554	72.73	24.94	29.6	41.26	42.42	8	2	5	6	9	429	48.9654	8.47021
c103362_g2_i1:69:851:3:+	len=261 acc=c103362_g2_i1:69:851:3:+ interpro_family=IPR027075 go=GO:0006378,GO:0006379,GO:0005847 interpro_raw=IPR027075,IPR001279 interpro_domain=IPR001279 id=c103362_g2_i1:69:851:3:+ def=IPR001279:Beta-lactamase-like; IPR027075:Cleavage and polyadenylation specificity factor subunit 2;	83.91	1	1	10	14	14.9244	10.3094		16.9862	7.08855	36.02	50.57		32.18	32.18	2	4		4	2	261	29.8422	6.11279
c104790_g1_i3:5220:7457:3:+	len=746	83.89	1	2	156	222	342.556	322.121	263.198	283.805	429.093	56.11	65.5	47.92	59.73	67.25	41	46	34	30	47	745	80.4559	10.1987
c99745_g3_i1:50:684:2:+	len=211 acc=c99745_g3_i1:50:684:2:+ interpro_family=IPR024888 go=GO:0017069,GO:0000398,GO:0000166,GO:0003676 interpro_raw=IPR012677,IPR024888,IPR000504 interpro_domain=IPR012677 id=c99745_g3_i1:50:684:2:+ def=IPR012677:Nucleotide-binding alpha-beta plait domain; IPR024888:U1 small nuclear ribonucleoprotein A/U2 small nuclear ribonucleoprotein B'';	83.89	1	1	10	15	3.83637	27.3751	3.0937		24.9511	19.91	70.14	13.74	0	61.14	1	5	1		4	211	23.9371	9.14404
c95799_g1_i1:416:697:2:+	len=94 acc=c95799_g1_i1:416:697:2:+ interpro_raw=IPR020574,IPR014721,IPR000754,IPR020568 interpro_family=IPR000754 go=GO:0003735,GO:0005840,GO:0006412 interpro_domain=IPR020568 id=c95799_g1_i1:416:697:2:+ def=IPR000754:Ribosomal protein S9; IPR020568:Ribosomal protein S5 domain 2-type fold;	83.87	2	1	4	12		5.87835	16.4225	18.7807		0	55.91	45.16	27.96			1	2	2		93	10.7008	9.94971
c99133_g3_i1:1:1154:2:+	len=384 acc=c99133_g3_i1:1:1154:2:+ interpro_family=IPR000997 interpro_raw=IPR002018,IPR019819,IPR029058,IPR019826 id=c99133_g3_i1:1:1154:2:+ interpro_domain=IPR029058 def=IPR000997:Cholinesterase; IPR029058:Alpha/Beta hydrolase fold;	83.85	1	17	52	57	64.0344	97.7001	40.9853	30.463	58.4248	43.23	43.75	75.78	42.71	42.19	13	15	8	8	10	384	42.3249	4.64014
CL8083Contig1:1:801:1:+	len=267 acc=CL8083Contig1:1:801:1:+ id=CL8083Contig1:1:801:1:+ interpro_family=IPR019372 interpro_raw=IPR019372 def=IPR019372:Lipoma HMGIC fusion partner-like protein;	83.83	3	5	21	25	26.3252	67.7123	3.99509	9.81436	26.4729	64.66	76.69	15.04	25.56	28.95	6	10	1	2	4	266	28.5577	8.45557
c105290_g1_i1:107:1516:2:+	len=470 acc=c105290_g1_i1:107:1516:2:+ interpro_domain=IPR005018,IPR006593,IPR002861 id=c105290_g1_i1:107:1516:2:+ interpro_raw=IPR002861,IPR006593,IPR005018 def=IPR002861:Reeler domain; IPR005018:DOMON domain; IPR006593:Cytochrome b561/ferric reductase transmembrane;	83.83	1	1	51	65	113.699	34.0595	43.3986	32.7072	83.7577	55.11	37.66	53.62	29.79	21.7	17	8	8	7	12	470	51.616	7.76709
c88108_g1_i1:108:518:3:+	len=137	83.82	1	1	6	7		10.5044	3.1049	2.69806	3.60933		60.29	41.18	19.85	23.53		3	2	1	1	136	14.8651	8.68994
CL962Contig1:1845:2383:3:+	len=179 acc=CL962Contig1:1845:2383:3:+ = interpro_raw=IPR026906 id=CL962Contig1:1845:2383:3:+ def=IPR026906:Leucine rich repeat 5;	83.8	1	1	6	6		6.32302		18.6583	13.6991		26.82	0	44.69	41.34		1		3	2	179	19.9394	5.50342
CL6413Contig1:1:448:2:+	len=149 acc=CL6413Contig1:1:448:2:+ interpro_family=IPR002161 go=GO:0004359,GO:0042819,GO:0042823 interpro_raw=IPR029062,IPR002161 pathways=KEGG:ec00330+3.5.1.2,KEGG:ec00471+3.5.1.2,KEGG:ec00250+3.5.1.2,MetaCyc:PWY-6466,UniPathway:UPA00245,KEGG:ec00750+4.3.3.6 ec=3.5.1.2 interpro_domain=IPR029062 id=CL6413Contig1:1:448:2:+ def=IPR002161:Pyridoxal 5'-phosphate synthase subunit PdxT/SNO; IPR029062:…	83.78	1	2	7	8	12.6918	10.1154	6.07402	6.90314	20.1864	43.92	76.35	35.14	38.51	54.73	2	2	1	1	2	148	16.1465	6.15088
c78664_g1_i1:1:337:3:+	len=111 acc=c78664_g1_i1:1:337:3:+ go=GO:0003824 interpro_raw=IPR004184 interpro_domain=IPR004184 id=c78664_g1_i1:1:337:3:+ def=IPR004184:Pyruvate formate lyase domain;	83.78	1	2	5	5	3.5052	9.27225	15.2935			26.13	54.95	75.68	0	0	1	1	3			111	12.5783	5.90967
c99735_g1_i1:1:447:2:+	len=148	83.78	1	16	23	29	23.3979	64.2395	10.597	14.154	37.873	49.32	83.78	53.38	39.19	62.84	5	10	3	2	6	148	16.9437	8.23584
CL815Contig1:584:1324:2:+	len=247	83.74	1	11	55	63	93.4098	74.6149	87.0918	34.749	64.0689	67.07	76.02	40.24	51.63	69.51	17	12	12	7	10	246	25.7946	9.45166
c97896_g2_i1:1:1018:2:+	len=339 acc=c97896_g2_i1:1:1018:2:+ go=GO:0015074,GO:0003676 interpro_raw=IPR012337,IPR001584 interpro_domain=IPR012337 id=c97896_g2_i1:1:1018:2:+ def=IPR012337:Ribonuclease H-like domain;	83.73	1	18	24	28	37.3881	33.308	11.7871	20.711	11.5122	55.03	39.64	28.11	43.79	29.88	7	7	4	4	2	338	37.2152	9.34912
c102786_g3_i1:1:390:1:+	len=130 acc=c102786_g3_i1:1:390:1:+ ec=1.-.-.- id=c102786_g3_i1:1:390:1:+ go=GO:0016491 interpro_family=IPR002347 interpro_raw=IPR016040,IPR020904,IPR002347 def=IPR002347:Glucose/ribitol dehydrogenase;	83.72	1	2	15	17	33.9024		35.7433	21.705	9.51179	55.81		83.72	62.79	62.79	5		6	3	2	129	13.9384	7.6792
c96787_g1_i3:242:1423:2:+	len=394 acc=c96787_g1_i3:242:1423:2:+ id=c96787_g1_i3:242:1423:2:+ interpro_domain=IPR005607 interpro_raw=IPR005607 def=IPR005607:BSD;	83.72	2	11	26	30	25.0687	50.8639	37.3647	23.1568	35.9508	53.18	41.22	53.69	31.3	33.08	6	5	5	5	6	393	43.0799	4.52588
c94058_g1_i1:93:371:3:+	len=93 acc=c94058_g1_i1:93:371:3:+ id=c94058_g1_i1:93:371:3:+ interpro_domain=IPR011332 interpro_raw=IPR002674,IPR011332,IPR011331 go=GO:0006412,GO:0005840,GO:0003735,GO:0005622 interpro_family=IPR002674 def=IPR002674:Ribosomal protein L37ae; IPR011332:Zinc-binding ribosomal protein;	83.7	1	4	4	17	27.2446		28.3111	18.9767		40.22	0	67.39	23.91	0	3		2	2		92	10.3204	10.4771
CL3380Contig1:239:517:2:+	len=93	83.7	1	2	2	3	2.63596	2.4331	2.64487			50	38.04	50	0	0	1	1	1			92	10.8824	5.96045
c102548_g1_i6:136:1758:1:+	len=541 acc=c102548_g1_i6:136:1758:1:+ id=c102548_g1_i6:136:1758:1:+ ec=1.14.-.- pathways= interpro_raw=IPR017972,IPR001128,IPR002401 interpro_family=IPR001128 go=GO:0016705,GO:0020037,GO:0005506,GO:0055114 def=IPR001128:Cytochrome P450;	83.7	2	1	25	41	38.5205	50.7017	21.5239	40.9673	10.4806	41.67	56.11	33.33	46.11	13.7	9	11	4	7	2	540	62.3009	9.08545
c103866_g2_i1:109:2061:1:+	len=651 acc=c103866_g2_i1:109:2061:1:+ interpro_family=IPR013126 interpro_raw=IPR029048,IPR018181,IPR013126,IPR029047 id=c103866_g2_i1:109:2061:1:+ interpro_domain=IPR029048,IPR029047 def=IPR013126:Heat shock protein 70 family; IPR029047:Heat shock protein 70kD, peptide-binding domain; IPR029048:Heat shock protein 70kD, C-terminal domain;	83.69	2	126	148	279	290.245	278.579	138.492	159.041	71.2075	52.46	61.38	42.46	50.77	31.85	40	60	46	45	20	650	71.0681	5.46533
c88238_g2_i1:1:461:2:+	len=153 acc=c88238_g2_i1:1:461:2:+ interpro_raw=IPR008136 interpro_domain=IPR008136 id=c88238_g2_i1:1:461:2:+ def=IPR008136:CinA, C-terminal;	83.66	1	11	22	24	37.6642	24.5329	10.5203	2.47276	21.9184	71.24	80.39	37.25	11.11	50.98	8	4	3	1	7	153	16.0292	8.60205
c110856_g1_i1:1:333:2:+	len=110 acc=c110856_g1_i1:1:333:2:+ id=c110856_g1_i1:1:333:2:+ interpro_domain=IPR011527 go=GO:0016021,GO:0005524,GO:0055085,GO:0042626,GO:0006810 interpro_raw=IPR011527 def=IPR011527:ABC transporter type 1, transmembrane domain;	83.64	1	2	5	10	6.36096	9.63478	27.8698	5.29567		73.64	53.64	83.64	16.36		1	2	4	1		110	12.3523	8.1626
c99317_g2_i1:1623:1955:3:+	len=111 acc=c99317_g2_i1:1623:1955:3:+ id=c99317_g2_i1:1623:1955:3:+ interpro_domain=IPR015880 go=GO:0046872 interpro_raw=IPR007087,IPR015880 def=IPR015880:Zinc finger, C2H2-like;	83.64	1	1	4	4		2.917	2.58754	3.26939			53.64	20	50			1	1	2		110	11.9224	7.28369
CL1047Contig1:93:2129:3:+	len=679 acc=CL1047Contig1:93:2129:3:+ ec=2.1.1.- interpro_domain=IPR029063 id=CL1047Contig1:93:2129:3:+ interpro_family=IPR025799 go=GO:0008168,GO:0006479 interpro_raw=IPR014644,IPR029063,IPR025799 def=IPR025799:Protein arginine N-methyltransferase; IPR029063:S-adenosyl-L-methionine-dependent methyltransferase;	83.63	2	1	30	32	20.1484	60.3141	27.0311	13.5546	22.0681	21.09	57.82	35.55	13.13	19.91	4	13	5	3	6	678	76.9353	5.8208
c26014_g1_i1:1:368:2:+	len=122	83.61	1	2	6	7	3.31895	4.12502	5.81261	8.51012	5.72951	22.95	45.9	29.51	58.2	54.1	1	1	1	2	1	122	14.1321	9.49561
c103898_g8_i4:628:2055:1:+	len=476 acc=c103898_g8_i4:628:2055:1:+ id=c103898_g8_i4:628:2055:1:+ interpro_domain=IPR000571 interpro_raw=IPR000571 go=GO:0046872 def=IPR000571:Zinc finger, CCCH-type;	83.58	1	1	64	84	115.176	50.7192	28.6794	45.3763	137.664	68.42	62.11	39.79	63.16	52.63	21	15	7	11	20	475	50.7688	9.20264
c103437_g1_i2:1:1061:1:+	len=353	83.57	1	5	13	14	16.7243	5.83975	20.3077	10.3306		43.91	44.76	29.46	22.95	0	3	3	4	3		353	38.0431	4.83057
c99084_g1_i1:1:421:2:+	len=140 acc=c99084_g1_i1:1:421:2:+ id=c99084_g1_i1:1:421:2:+ interpro_domain=IPR009081 interpro_raw=IPR009081,IPR006162 def=IPR009081:Acyl carrier protein-like;	83.57	1	3	7	7	23.6843			11.9456	32.4861	58.57		0	57.14	78.57	3			1	3	140	15.6791	4.98291
c104178_g1_i2:318:2711:3:+	len=798 acc=c104178_g1_i2:318:2711:3:+ interpro_family=IPR000412 go=GO:0006810,GO:0005524,GO:0016887,GO:0016020 interpro_raw=IPR000412,IPR017871,IPR003593,IPR027417,IPR003439 ec=3.6.1.3 interpro_domain=IPR027417,IPR003439 id=c104178_g1_i2:318:2711:3:+ def=IPR000412:ABC-2 transporter; IPR003439:ABC transporter-like; IPR027417:P-loop containing nucleoside triphosphate hydrolase;	83.56	2	15	66	88	97.7902	55.8734	87.8505	102.133	132.629	47.05	47.55	45.04	67.25	54.71	17	11	12	16	19	797	88.0223	7.38623
c102881_g2_i3:1:806:3:+	len=268 acc=c102881_g2_i3:1:806:3:+ id=c102881_g2_i3:1:806:3:+ interpro_domain=IPR027417 interpro_raw=IPR001806,IPR003578,IPR003579,IPR005225,IPR002041,IPR027417,IPR020849 go=GO:0005622,GO:0007165,GO:0006886,GO:0005525,GO:0007264,GO:0015031,GO:0006913,GO:0003924,GO:0016020 interpro_family=IPR002041,IPR001806 pathways= def=IPR001806:Small GTPase superfamily; IPR002041:Ran GTPase; IPR027417:P-loop …	83.52	1	2	7	7	10.126	15.7462			8.56745	37.45	47.57			23.97	3	3			1	267	30.3639	5.84619
	>sp|DHE3_BOVIN|	83.51	1	18	25	30	20.689	34.8033	29.434	36.427	21.7748	23.3	35.13	24.37	39.43	34.77	7	6	5	5	4	558	61.4732	7.59131
c102861_g1_i2:422:1351:2:+	len=310 acc=c102861_g1_i2:422:1351:2:+ id=c102861_g1_i2:422:1351:2:+ interpro_raw=IPR006214 interpro_family=IPR006214 def=IPR006214:Bax inhibitor 1-related;	83.5	2	3	107	139	238.306	221.66	148.814	82.6351	122.51	73.46	70.55	83.5	70.55	62.14	35	29	21	12	16	309	33.4351	7.95752
c61378_g1_i1:11:322:2:+	len=104 acc=c61378_g1_i1:11:322:2:+ interpro_raw=IPR020846 id=c61378_g1_i1:11:322:2:+ interpro_domain=IPR020846 def=IPR020846:Major facilitator superfamily domain;	83.5	1	1	8	8	6.81656	10.6191		3.79907	16.1727	56.31	60.19	0	63.11	59.22	1	1		2	4	103	11.527	8.17725
c87885_g1_i1:1:331:2:+	len=110 acc=c87885_g1_i1:1:331:2:+ interpro_domain=IPR029058 id=c87885_g1_i1:1:331:2:+ interpro_raw=IPR029058 def=IPR029058:Alpha/Beta hydrolase fold;	83.49	1	4	5	6	4.50625	18.1827	7.58724	3.73095		43.12	74.31	22.94	43.12	0	1	2	2	1		109	12.7136	8.83643
c100549_g1_i2:1:385:2:+	len=128 acc=c100549_g1_i2:1:385:2:+ go=GO:0006508,GO:0008234 interpro_family=IPR013128 interpro_raw=IPR013128,IPR000668,IPR025660 ec=3.4.-.- id=c100549_g1_i2:1:385:2:+ def=IPR013128:Peptidase C1A; IPR025660:Cysteine peptidase, histidine active site;	83.46	1	1	7	25	41.723	86.7064	20.7867	9.25261	13.0243	57.48	83.46	61.42	57.48	55.91	1	4	2	1	2	127	14.0783	7.51807
c104636_g3_i3:232:993:1:+	len=254 acc=c104636_g3_i3:232:993:1:+ interpro_family=IPR024940 go=GO:0006355,GO:0005634,GO:0006357,GO:0016055 interpro_raw=IPR028782,IPR024940,IPR027397,IPR013558 interpro_domain=IPR027397,IPR013558 id=c104636_g3_i3:232:993:1:+ def=IPR013558:CTNNB1 binding, N-teminal; IPR024940:Transcription factor TCF/LEF; IPR027397:Catenin binding domain;	83.46	1	34	38	56	56.7312	39.3515	35.4476	10.872	17.9883	83.46	48.03	50	24.8	55.51	12	13	9	4	6	254	26.7757	5.36377
CL8126Contig1:1:909:1:+	len=303 acc=CL8126Contig1:1:909:1:+ interpro_raw=IPR029058,IPR002018 interpro_domain=IPR029058 id=CL8126Contig1:1:909:1:+ def=IPR029058:Alpha/Beta hydrolase fold;	83.44	1	1	23	25	36.7746	45.5982	13.2547	17.0763	23.8497	50	42.05	23.51	54.64	34.44	5	7	3	4	5	302	34.4224	5.90967
c97098_g1_i7:464:919:2:+	len=152 acc=c97098_g1_i7:464:919:2:+ interpro_raw=IPR012677 go=GO:0000166 interpro_domain=IPR012677 id=c97098_g1_i7:464:919:2:+ def=IPR012677:Nucleotide-binding alpha-beta plait domain;	83.44	2	1	18	25	13.836	30.0623	16.7787	13.5044	21.1819	55.63	48.34	28.48	57.62	70.86	2	6	3	3	4	151	16.5365	5.17334
c104632_g2_i5:1:562:1:+	len=187 acc=c104632_g2_i5:1:562:1:+ id=c104632_g2_i5:1:562:1:+ interpro_domain=IPR001452 interpro_raw=IPR001452,IPR013315 go=GO:0005515 def=IPR001452:SH3 domain;	83.42	1	1	4	4		4.97434	7.75851	2.01153			26.74	29.95	43.85	0		1	1	2		187	20.8048	4.67822
c101171_g3_i2:1:708:1:+	len=236	83.4	1	6	21	25	18.0638	45.19	15.1833	2.99344	18.9305	57.87	63.4	47.66	27.23	49.79	6	8	4	2	4	235	24.5908	5.74463
CL8694Contig1:70:1677:1:+	len=536 acc=CL8694Contig1:70:1677:1:+ go=GO:0055085,GO:0016021 interpro_family=IPR011701 interpro_raw=IPR020846,IPR011701 id=CL8694Contig1:70:1677:1:+ interpro_domain=IPR020846 def=IPR011701:Major facilitator superfamily; IPR020846:Major facilitator superfamily domain;	83.36	2	38	47	58	117.891	42.3985	36.5043	33.9361	89.5538	36.26	43.93	41.12	25.61	38.13	18	7	5	6	14	535	59.1462	9.02686
c104035_g1_i2:1:275:3:+	len=91	83.33	1	5	11	16	23.892	21.4252	7.15019	6.78823	23.2294	71.11	72.22	41.11	34.44	76.67	3	4	2	2	3	90	9.07048	8.93896
c108312_g1_i1:1:382:3:+	len=126	83.33	1	2	9	11	12.9449	1.23283	9.08922		11.0838	63.49	10.32	45.24	0	66.67	3	1	3		3	126	12.1909	10.3013
c25145_g1_i1:1:328:3:+	len=108 acc=c25145_g1_i1:1:328:3:+ pathways=MetaCyc:PWY-6983,MetaCyc:PWY-5663,MetaCyc:PWY-5664,KEGG:ec00790+4.2.3.12,MetaCyc:PWY-7442,UniPathway:UPA00849 interpro_raw=IPR022469,IPR007115 go=GO:0006729,GO:0003874 interpro_family=IPR007115 id=c25145_g1_i1:1:328:3:+ ec=4.2.3.12 def=IPR007115:6-pyruvoyl tetrahydropterin synthase/QueD family protein;	83.33	1	2	5	11	4.79551	16.5457	4.11779		31.7748	33.33	33.33	27.78	0	83.33	1	1	1		4	108	12.4205	8.1333
c55271_g1_i1:80:350:2:+	len=90	83.33	1	8	12	12	23.9982	17.3364	4.096	7.97712	24.0105	64.44	63.33	43.33	53.33	63.33	4	3	1	1	3	90	9.65793	11.9272
c96352_g1_i1:57:524:3:+	len=156	83.33	1	12	23	35	31.0061	12.0592	46.9436	161.764	5.11405	82.05	42.31	65.38	65.38	39.1	4	3	8	13	1	156	15.054	5.85889
c96989_g1_i1:1:581:3:+	len=193 acc=c96989_g1_i1:1:581:3:+ id=c96989_g1_i1:1:581:3:+ interpro_domain=IPR009057 go=GO:0043565,GO:0003700,GO:0006355,GO:0003677,GO:0005634 interpro_family=IPR017995 interpro_raw=IPR017970,IPR020479,IPR009057,IPR001827,IPR001356,IPR017995 def=IPR009057:Homeodomain-like; IPR017995:Homeobox protein, antennapedia type;	83.33	2	5	10	10	11.1481	11.478	6.76293		6.41233	44.27	37.5	26.04	0	29.17	3	4	2		1	192	21.2614	10.2134
c99343_g3_i1:1:166:2:+	len=55 acc=c99343_g3_i1:1:166:2:+ interpro_domain=IPR020683 id=c99343_g3_i1:1:166:2:+ go=GO:0005515 interpro_raw=IPR002110,IPR020683 def=IPR020683:Ankyrin repeat-containing domain;	83.33	1	1	3	3	6.1219	5.64471	3.68905			77.78	83.33	72.22	0	0	1	1	1			54	5.44377	9.83252
c108204_g1_i1:1:344:1:+	len=114 acc=c108204_g1_i1:1:344:1:+ pathways=MetaCyc:PWY-1861,UniPathway:UPA00115,KEGG:ec00030+2.2.1.2,MetaCyc:PWY-5723 go=GO:0003824,GO:0005975 interpro_family=IPR001585 interpro_raw=IPR018225,IPR001585,IPR013785 id=c108204_g1_i1:1:344:1:+ interpro_domain=IPR013785 def=IPR001585:Transaldolase; IPR013785:Aldolase-type TIM barrel;	83.33	1	2	8	8		21.3597	21.328		20.0943		82.46	72.81	0	78.07		3	2		3	114	12.3575	6.07471
c85438_g3_i1:1:180:1:+	len=60	83.33	1	2	2	2			3.97544	4.79617				73.33	51.67				1	1		60	6.69821	4.53857
CL3125Contig1:136:1035:1:+	len=300 acc=CL3125Contig1:136:1035:1:+ ec=2.1.1.20 interpro_domain=IPR029063 id=CL3125Contig1:136:1035:1:+ interpro_family=IPR014369 go=GO:0017174 interpro_raw=IPR029063,IPR014369 def=IPR014369:Glycine/Sarcosine N-methyltransferase; IPR029063:S-adenosyl-L-methionine-dependent methyltransferase;	83.28	1	1	12	15	20.9767	14.7351	2.99107	16.1724	18.1359	46.15	42.47	10.37	36.79	37.46	3	3	1	3	3	299	33.9341	5.69385
c96507_g2_i1:1:936:2:+	len=311 acc=c96507_g2_i1:1:936:2:+ go=GO:0016020,GO:0006811,GO:0005216,GO:0005261,GO:0055085 interpro_family=IPR028823 interpro_raw=IPR028823,IPR005821,IPR027359 id=c96507_g2_i1:1:936:2:+ interpro_domain=IPR027359,IPR005821 def=IPR005821:Ion transport domain; IPR027359:Voltage-dependent channel, four helix bundle domain; IPR028823:Sodium leak channel non-selective protein;	83.28	1	2	17	24	20.3773	4.45344	8.871	32.6241	34.9497	56.59	14.79	27.97	75.56	54.02	5	1	2	4	6	311	35.6334	9.17334
c101718_g3_i2:15:1199:3:+	len=395	83.25	4	35	83	144	156.611	74.5261	123.105	155.922	333.379	56.85	55.08	44.42	61.42	51.02	23	11	13	22	32	394	43.9256	7.26904
c100536_g1_i1:246:2213:3:+	len=656 acc=c100536_g1_i1:246:2213:3:+ interpro_raw=IPR004088,IPR014014,IPR014001,IPR001650,IPR004087,IPR000629,IPR011545,IPR027417 go=GO:0005524,GO:0003676,GO:0003723 interpro_family=IPR004807 id=c100536_g1_i1:246:2213:3:+ interpro_domain=IPR014014,IPR004087,IPR027417 def=IPR004087:K Homology domain; IPR004807:UvrABC system, subunit B; IPR014014:RNA helicase, DEAD-box type, Q motif; IPR027417:P-…	83.21	1	13	30	37	50.2077	50.1598	33.8279	31.3122	13.3716	42.75	36.95	43.82	28.85	19.24	9	8	7	5	3	655	73.8295	5.77002
c30705_g1_i1:1:395:1:+	len=131 acc=c30705_g1_i1:1:395:1:+ interpro_family=IPR005828 go=GO:0022857,GO:0055085,GO:0005215,GO:0016021 interpro_raw=IPR005828,IPR005829,IPR020846 interpro_domain=IPR020846 id=c30705_g1_i1:1:395:1:+ def=IPR005828:General substrate transporter; IPR020846:Major facilitator superfamily domain;	83.21	1	1	17	26	69.8487	23.9863	9.54235	9.2922	28.9644	76.34	58.78	64.12	58.78	74.81	7	4	1	2	6	131	14.3567	7.95752
CL8871Contig1:10:403:1:+	len=131 acc=CL8871Contig1:10:403:1:+ interpro_domain=IPR001623 id=CL8871Contig1:10:403:1:+ interpro_raw=IPR001623 def=IPR001623:DnaJ domain;	83.21	1	1	5	6			9.63621	5.11295	7.62324		0	22.14	65.65	55.73			2	2	2	131	14.9764	5.79541
c104318_g4_i12:1:1825:2:+	len=608 acc=c104318_g4_i12:1:1825:2:+ id=c104318_g4_i12:1:1825:2:+ interpro_family=IPR016313 go=GO:0005515 interpro_raw=IPR016313,IPR001478 def=IPR016313:Disks large 1;	83.2	4	3	53	62	91.6362	73.3455	149.693	50.3715	48.0359	59.14	56.34	66.23	51.07	34.1	14	9	19	8	7	607	65.5636	5.78271
c17931_g1_i1:18:375:3:+	len=119 acc=c17931_g1_i1:18:375:3:+ interpro_family=IPR005155 interpro_raw=IPR005155,IPR015947 id=c17931_g1_i1:18:375:3:+ def=IPR005155:Ribosome biogenesis factor NIP7-like;	83.19	1	1	9	12	13.8874	3.6697	16.1972		3.78379	79.83	68.91	51.26		46.22	3	2	3		1	119	13.539	8.99756
c92934_g1_i2:159:482:3:+	len=108 acc=c92934_g1_i2:159:482:3:+ id=c92934_g1_i2:159:482:3:+ interpro_domain=IPR009018 interpro_raw=IPR009018,IPR003210 go=GO:0008312,GO:0006614,GO:0005786,GO:0048500,GO:0030942 interpro_family=IPR003210 pathways= def=IPR003210:Signal recognition particle, SRP14 subunit; IPR009018:Signal recognition particle, SRP9/SRP14 subunit;	83.18	2	2	3	3				3.06224	12.1389	0			17.76	65.42				1	2	107	12.1737	10.1401
c102780_g3_i2:187:491:1:+	len=101 acc=c102780_g3_i2:187:491:1:+ id=c102780_g3_i2:187:491:1:+ interpro_domain=IPR012349 ec=1.4.3.5 interpro_raw=IPR011576,IPR012349 go=GO:0055114,GO:0016491,GO:0004733,GO:0010181 pathways=KEGG:ec00750+1.4.3.5,UniPathway:UPA00190,MetaCyc:PWY-7282,MetaCyc:PWY-7204 def=IPR012349:FMN-binding split barrel;	83.17	1	1	7	12		34.8436	22.5186		6.87252	0	83.17	83.17	0	59.41		5	3		1	101	11.2989	9.0415
c105305_g4_i3:1:307:3:+	len=101 acc=c105305_g4_i3:1:307:3:+ interpro_raw=IPR011502 interpro_family=IPR011502 id=c105305_g4_i3:1:307:3:+ def=IPR011502:Nucleoporin Nup85-like;	83.17	1	1	8	9	27.6742	16.2484	4.88408	4.98886		83.17	81.19	52.48	32.67		4	3	1	1		101	11.4331	9.75928
c96128_g1_i1:155:1279:2:+	len=375 acc=c96128_g1_i1:155:1279:2:+ interpro_raw=IPR012677,IPR000504,IPR020095 go=GO:0001522,GO:0009982,GO:0003723,GO:0000166,GO:0009451,GO:0003676 id=c96128_g1_i1:155:1279:2:+ interpro_domain=IPR012677,IPR020095 ec=5.4.99.12 def=IPR012677:Nucleotide-binding alpha-beta plait domain; IPR020095:Pseudouridine synthase I, TruA, C-terminal;	83.16	1	14	49	60	104.963	74.8494	32.8538	30.911	90.0516	47.86	62.83	37.97	25.13	54.28	17	11	6	8	14	374	41.4319	9.89111
CL9352Contig1:154:705:1:+	len=184 acc=CL9352Contig1:154:705:1:+ interpro_domain=IPR002861 id=CL9352Contig1:154:705:1:+ interpro_raw=IPR002861 def=IPR002861:Reeler domain;	83.15	1	8	9	10	11.2518	6.91138	9.48022	7.63693	6.46867	58.15	24.46	67.39	35.33	16.85	2	2	2	2	1	184	20.809	5.93506
CL7472Contig1:1:1053:1:+	len=351	83.14	2	8	15	19	3.02033	49.2085	10.8522		17.7632	35.71	53.43	23.14	0	43.43	2	6	2		5	350	39.6803	7.94287
CL9954Contig1:1:1213:2:+	len=404 acc=CL9954Contig1:1:1213:2:+ interpro_domain=IPR009045,IPR028992 id=CL9954Contig1:1:1213:2:+ ec=3.4.-.- interpro_raw=IPR003586,IPR001767,IPR006141,IPR001657,IPR028992,IPR003587,IPR009045,IPR000320 interpro_family=IPR001657 go=GO:0007275,GO:0006508,GO:0007154,GO:0016539,GO:0008233,GO:0007267 def=IPR001657:Hedgehog protein; IPR009045:Hedgehog signalling/DD-peptidase zinc-binding domain; IPR…	83.13	1	1	24	28	32.3237	7.68072	30.0517	17.7167	59.0333	39.95	20.84	61.79	42.93	45.41	5	2	7	4	8	403	45.2002	8.27979
c80074_g1_i1:1:715:2:+	len=238 acc=c80074_g1_i1:1:715:2:+ interpro_raw=IPR001948 go=GO:0008270,GO:0004177,GO:0006508 interpro_family=IPR001948 id=c80074_g1_i1:1:715:2:+ ec=3.4.11.- def=IPR001948:Peptidase M18;	83.12	1	1	13	15	6.36169	9.8324	25.3373	18.7993	31.8201	14.35	49.79	30.38	34.18	52.32	1	3	2	1	6	237	25.717	7.1958
c90406_g1_i1:1:449:3:+	len=149	83.11	1	1	11	14	9.43458	17.1458	8.33412	2.36768	7.16311	83.11	51.35	52.7	16.22	33.11	3	4	2	1	1	148	16.0727	4.55127
c19239_g1_i1:1:215:2:+	len=71 acc=c19239_g1_i1:1:215:2:+ interpro_domain=IPR011262 id=c19239_g1_i1:1:215:2:+ ec=2.7.7.6 pathways=KEGG:ec00240+2.7.7.6,KEGG:ec00230+2.7.7.6 interpro_raw=IPR011262 go=GO:0006351,GO:0003899,GO:0046983 def=IPR011262:DNA-directed RNA polymerase, insert domain;	83.1	1	2	3	4	2.45804	3.25984	5.75339		2.62527	39.44	39.44	53.52		49.3	1	1	1		1	71	8.16521	6.62451
c85600_g1_i1:1:213:1:+	len=71 acc=c85600_g1_i1:1:213:1:+ interpro_domain=IPR000477 id=c85600_g1_i1:1:213:1:+ interpro_raw=IPR000477 def=IPR000477:Reverse transcriptase domain;	83.1	1	1	2	3	5.19376	4.76424			5.24795	47.89	36.62			36.62	1	1			1	71	7.72404	9.34912
c94100_g3_i1:1:215:2:+	len=71 acc=c94100_g3_i1:1:215:2:+ go=GO:0005515 interpro_raw=IPR002110,IPR020683 id=c94100_g3_i1:1:215:2:+ interpro_domain=IPR020683 def=IPR020683:Ankyrin repeat-containing domain;	83.1	1	1	4	4	6.86924	11.1926	4.44114			74.65	83.1	46.48	0		1	2	1			71	7.60611	8.5874
c102560_g3_i7:71:463:2:+	len=131 acc=c102560_g3_i7:71:463:2:+ interpro_domain=IPR012677 id=c102560_g3_i7:71:463:2:+ go=GO:0003676,GO:0000166 interpro_raw=IPR012677,IPR000504 def=IPR012677:Nucleotide-binding alpha-beta plait domain;	83.08	1	1	10	13	6.78807	4.69499	33.0624	12.1838	4.53562	34.62	30	75.38	41.54	63.85	1	1	5	2	2	130	14.413	4.67822
c101486_g1_i1:70:1593:1:+	len=508 acc=c101486_g1_i1:70:1593:1:+ pathways=MetaCyc:PWY-7003,MetaCyc:PWY-7124,MetaCyc:PWY-5484,MetaCyc:PWY-7218,KEGG:ec00680+4.2.1.11,MetaCyc:PWY-1622,MetaCyc:PWY-6142,MetaCyc:PWY-6886,MetaCyc:PWY-6901,MetaCyc:PWY-5723,KEGG:ec00010+4.2.1.11,UniPathway:UPA00109,MetaCyc:PWY-2221,MetaCyc:PWY-1042 interpro_raw=IPR020811,IPR000941,IPR020809,IPR029065,IPR029017,IPR020810 interpro_family=IPR000941 go…	83.04	3	28	30	36	61.9985	42.8878	25.7211	30.7914	29.3962	45.56	40.24	23.08	47.53	40.43	7	7	6	8	5	507	55.2645	8.1626
c90738_g1_i1:1:337:1:+	len=112 acc=c90738_g1_i1:1:337:1:+ interpro_raw=IPR013524,IPR012346 go=GO:0006355,GO:0005634,GO:0003677,GO:0003700 interpro_domain=IPR012346 id=c90738_g1_i1:1:337:1:+ def=IPR012346:p53/RUNT-type transcription factor, DNA-binding domain;	83.04	1	1	3	4	2.35376				7.1354	22.32	0			83.04	1				2	112	12.5293	8.48486
c98143_g1_i1:12:827:3:+	len=272 acc=c98143_g1_i1:12:827:3:+ interpro_raw=IPR018114,IPR001314,IPR001254,IPR009003 interpro_family=IPR001314 go=GO:0006508,GO:0004252 interpro_domain=IPR009003 id=c98143_g1_i1:12:827:3:+ ec=3.4.21.- def=IPR001314:Peptidase S1A, chymotrypsin-type; IPR009003:Trypsin-like cysteine/serine peptidase domain;	83.03	2	1	12	18	19.5737		31.8242	5.29533	25.5141	81.55	0	34.32	16.24	54.24	5		5	1	4	271	28.348	4.55127
CL1317Contig1:1:641:3:+	len=213 acc=CL1317Contig1:1:641:3:+ id=CL1317Contig1:1:641:3:+ interpro_domain=IPR000980 go=GO:0035591,GO:0007165 interpro_family=IPR030523 interpro_raw=IPR000980,IPR030523 def=IPR000980:SH2 domain; IPR030523:SH2B adapter protein;	83.02	2	2	12	13	17.4755	10.9275	5.6556	12.9506	11.6421	52.36	61.32	16.04	42.92	45.28	3	2	2	3	3	212	23.9437	7.54736
c82266_g1_i1:135:452:3:+	len=106 acc=c82266_g1_i1:135:452:3:+ go=GO:0003824 interpro_raw=IPR004184 id=c82266_g1_i1:135:452:3:+ interpro_domain=IPR004184 def=IPR004184:Pyruvate formate lyase domain;	83.02	1	1	3	4	7.40555		8.65674			62.26		46.23	0		1		2			106	12.3391	5.19873
c89529_g1_i1:25:502:1:+	len=159 acc=c89529_g1_i1:25:502:1:+ interpro_raw=IPR005225,IPR006689,IPR027417,IPR006687,IPR024156 interpro_family=IPR006689 go=GO:0007264,GO:0005622,GO:0005525,GO:0006886 interpro_domain=IPR027417 id=c89529_g1_i1:25:502:1:+ def=IPR006689:Small GTPase superfamily, ARF/SAR type; IPR027417:P-loop containing nucleoside triphosphate hydrolase;	83.02	1	1	12	14	14.4199	20.9442	17.9525	2.50139	14.0208	65.41	62.89	51.57	11.32	47.17	2	4	4	1	2	159	18.1012	6.52197
c102104_g3_i2:2854:3015:1:-	len=54	83.02	1	1	4	5		17.1448	3.13356				83.02	83.02				4	1			53	6.06127	10.3892
c101410_g2_i1:127:2160:1:+	len=678 acc=c101410_g2_i1:127:2160:1:+ interpro_raw=IPR025712,IPR024864 go=GO:0005643 interpro_family=IPR024864 id=c101410_g2_i1:127:2160:1:+ interpro_domain=IPR025712 def=IPR024864:Nucleoporin Nup54/Nup57/Nup44; IPR025712:Nucleoporin Nup54, alpha-helical domain;	83.01	1	110	141	191	100.88	145.713	185.499	501.225	232.092	71.49	58.05	54.36	55.39	66.32	19	27	32	54	26	677	71.5516	9.5249
CL1141Contig1:140:1201:2:+	len=354 acc=CL1141Contig1:140:1201:2:+ interpro_raw=IPR029033,IPR000560 go=GO:0003993 interpro_family=IPR029033 id=CL1141Contig1:140:1201:2:+ ec=3.1.3.2 def=IPR029033:Histidine phosphatase superfamily;	83	1	4	16	18	17.0637	18.4726	4.35397	21.8426	35.9192	38.24	45.89	13.6	37.96	35.69	3	4	2	4	3	353	40.5034	5.69385
c87905_g5_i1:285:585:3:+	len=100	83	1	1	1	2		9.61848					83		0			1				100	10.9795	6.50732
CL8031Contig1:263:1252:2:+	len=330 acc=CL8031Contig1:263:1252:2:+ go=GO:0003676,GO:0000166 interpro_raw=IPR000504,IPR012677 interpro_domain=IPR012677 id=CL8031Contig1:263:1252:2:+ def=IPR012677:Nucleotide-binding alpha-beta plait domain;	82.98	1	1	34	35	30.4742	24.7022	18.4848	27.6936	33.8523	55.62	43.47	47.42	38.6	42.86	9	9	4	6	7	329	34.7493	7.57666
	>sp|UBE2I_HUMAN|	82.91	1	1	6	7	3.05108	3.0515	3.69714	10.7581		20.89	37.34	15.19	74.05		1	1	1	3		158	17.9952	8.66064
c98981_g4_i1:1:582:1:+	len=194 acc=c98981_g4_i1:1:582:1:+ go=GO:0005515 interpro_raw=IPR020683,IPR002110 id=c98981_g4_i1:1:582:1:+ interpro_domain=IPR020683 def=IPR020683:Ankyrin repeat-containing domain;	82.9	2	0	10	11	15.7773	2.81657		3.85966	21.656	52.85	15.03		31.61	55.44	3	1		1	5	193	21.3173	8.67529
c97061_g1_i1:51:1070:3:+	len=340 acc=c97061_g1_i1:51:1070:3:+ id=c97061_g1_i1:51:1070:3:+ go=GO:0005515 = interpro_raw=IPR001611,IPR003591 def=IPR001611:Leucine-rich repeat; IPR003591:Leucine-rich repeat, typical subtype;	82.89	1	4	16	17	34.9995	24.802	4.25588	8.99043	22.7912	43.07	44.54	12.68	19.47	33.92	5	4	1	2	4	339	38.4498	6.44287
c103898_g8_i1:693:2201:3:+	len=503 acc=c103898_g8_i1:693:2201:3:+ go=GO:0046872 interpro_raw=IPR000571 id=c103898_g8_i1:693:2201:3:+ interpro_domain=IPR000571 def=IPR000571:Zinc finger, CCCH-type;	82.87	1	1	60	80	111.824	47.6841	28.6794	38.1958	138.751	65.74	54.58	37.65	49.2	50.8	20	14	7	9	18	502	53.8652	8.85107
c93215_g1_i1:1:651:1:+	len=217 acc=c93215_g1_i1:1:651:1:+ interpro_raw=IPR000618 interpro_family=IPR000618 go=GO:0042302 id=c93215_g1_i1:1:651:1:+ def=IPR000618:Insect cuticle protein;	82.87	1	6	13	14	15.4656	13.9624	10.9873	10.4331	17.3885	36.11	58.33	31.48	43.06	33.8	3	3	2	2	4	216	22.0434	7.54736
c17249_g1_i1:1:319:3:+	len=105 acc=c17249_g1_i1:1:319:3:+ id=c17249_g1_i1:1:319:3:+ interpro_domain=IPR012336 interpro_raw=IPR012336 def=IPR012336:Thioredoxin-like fold;	82.86	1	1	7	8	9.29943	3.17043	3.92234	2.9879	14.5205	58.1	41.9	44.76	22.86	78.1	2	1	1	1	3	105	11.3297	5.63037
c97487_g4_i1:1:213:1:+	len=71 acc=c97487_g4_i1:1:213:1:+ interpro_family=IPR022727 interpro_raw=IPR022727 id=c97487_g4_i1:1:213:1:+ def=IPR022727:Pupal cuticle protein C1;	82.86	1	1	7	7	9.5141		4.62686		9.19559	58.57	0	34.29		68.57	2		2		3	70	6.94152	8.60205
c100890_g2_i1:294:1397:3:+	len=368 acc=c100890_g2_i1:294:1397:3:+ interpro_family=IPR000734 go=GO:0052689 interpro_raw=IPR000734,IPR029058,IPR013818 ec=3.1.1.1 interpro_domain=IPR029058 id=c100890_g2_i1:294:1397:3:+ def=IPR000734:Triacylglycerol lipase family; IPR029058:Alpha/Beta hydrolase fold;	82.83	1	1	28	30	42.8169	36.1958	18.7395	29.2192	21.8675	56.13	45.5	37.6	40.87	48.77	8	7	5	5	4	367	40.6455	7.43018
c93489_g1_i2:1:700:2:+	len=233 acc=c93489_g1_i2:1:700:2:+ interpro_raw=IPR001828,IPR019594,IPR028082 go=GO:0004970,GO:0016020,GO:0005234 interpro_family=IPR001508 id=c93489_g1_i2:1:700:2:+ interpro_domain=IPR028082 def=IPR001508:Ionotropic glutamate receptor, metazoa; IPR028082:Periplasmic binding protein-like I;	82.83	1	2	11	16	9.89669	24.5155	12.1014	3.11557	11.9115	42.92	60.52	28.33	29.61	33.48	2	4	3	2	2	233	26.2163	5.10986
CL8044Contig1:344:2197:2:+	len=618 acc=CL8044Contig1:344:2197:2:+ id=CL8044Contig1:344:2197:2:+ interpro_domain=IPR020846 go=GO:0016021,GO:0022857,GO:0055085 interpro_family=IPR005828 interpro_raw=IPR005828,IPR020846 def=IPR005828:General substrate transporter; IPR020846:Major facilitator superfamily domain;	82.82	1	16	46	57	70.2653	27.9577	51.4672	45.2613	51.7565	37.28	25.12	56.4	36.79	47.65	13	5	10	8	11	617	68.8282	6.85889
c100090_g3_i1:1:544:2:+	len=181 acc=c100090_g3_i1:1:544:2:+ interpro_domain=IPR000477 id=c100090_g3_i1:1:544:2:+ interpro_raw=IPR000477 def=IPR000477:Reverse transcriptase domain;	82.78	1	1	10	16	9.93808	20.7291	17.1413	10.5037	26.0886	35	71.67	70	67.78	57.78	1	4	4	2	2	180	20.9996	9.0415
c60792_g1_i1:1:627:1:+	len=209 acc=c60792_g1_i1:1:627:1:+ = interpro_raw=IPR003409 id=c60792_g1_i1:1:627:1:+ def=IPR003409:MORN motif;	82.78	1	3	11	15	16.1862	3.5222	12.2684	6.63157	5.18343	66.51	13.88	40.19	39.71	22.01	4	1	3	3	1	209	23.1704	8.6167
c105283_g1_i3:132:3356:3:+	len=1075 acc=c105283_g1_i3:132:3356:3:+ ec=1.6.1.-,1.6.1.2 interpro_domain=IPR029035,IPR024605,IPR007698,IPR007886 id=c105283_g1_i3:132:3356:3:+ interpro_family=IPR012136,IPR026255 go=GO:0008750,GO:0016021,GO:0055114,GO:0050661,GO:0016491,GO:0015992,GO:0008746 interpro_raw=IPR024605,IPR007886,IPR007698,IPR026255,IPR008143,IPR012136,IPR029035 pathways=KEGG:ec00760+1.6.1.2,KEGG:ec00250+1.4.1.1,KEGG…	82.77	2	149	200	262	406.075	360.737	189.927	197.758	265.532	58.19	58.75	49.72	55.77	62.48	57	60	33	31	43	1074	113.218	6.99072
c101416_g1_i1:26:811:2:+	len=262 acc=c101416_g1_i1:26:811:2:+ id=c101416_g1_i1:26:811:2:+ interpro_domain=IPR009003 ec=3.4.21.- interpro_raw=IPR009003,IPR001254,IPR018114,IPR001314 go=GO:0006508,GO:0004252 interpro_family=IPR001314 def=IPR001314:Peptidase S1A, chymotrypsin-type; IPR009003:Trypsin-like cysteine/serine peptidase domain;	82.76	1	12	18	18	17.4434	33.6461	7.72962	10.8045	24.2621	54.79	67.43	43.3	37.16	37.93	4	7	2	1	4	261	27.0463	8.17725
c105405_g2_i3:1:265:2:+	len=88	82.76	1	1	6	7	14.5762		16.4209		13.9136	75.86	0	73.56		78.16	2		3		2	87	9.99914	9.77393
CL9367Contig1:63:1487:3:+	len=475 acc=CL9367Contig1:63:1487:3:+ go=GO:0016758,GO:0008152 interpro_family=IPR002213 interpro_raw=IPR002213 ec=2.4.1.- id=CL9367Contig1:63:1487:3:+ def=IPR002213:UDP-glucuronosyl/UDP-glucosyltransferase;	82.74	1	25	43	59	57.1972	85.4972	22.2636	38.1682	113.525	50.95	48	39.37	46.32	51.37	9	11	7	7	16	475	53.7139	7.00537
CL2077Contig1:332:994:2:+	len=221 acc=CL2077Contig1:332:994:2:+ pathways= interpro_raw=IPR001806,IPR003578,IPR003579,IPR005225,IPR002041,IPR024156,IPR027417,IPR020849 go=GO:0005525,GO:0015031,GO:0007264,GO:0007165,GO:0005622,GO:0006886,GO:0016020,GO:0003924,GO:0006913 interpro_family=IPR001806,IPR002041,IPR024156 id=CL2077Contig1:332:994:2:+ interpro_domain=IPR027417 def=IPR001806:Small GTPase superfamily; IPR002041:Ran G…	82.73	1	2	8	8	4.68263		3.64086	15.7558	10.5412	19.09		18.18	69.09	48.18	2		1	3	2	220	24.9093	5.52881
CL7627Contig1:434:1096:2:+	len=221	82.73	1	9	20	21	43.3474	28.495	5.48361	17.3012	19.0912	43.18	25.91	21.82	18.64	55	7	6	2	3	3	220	24.4625	10.1255
c98296_g1_i3:1:245:3:+	len=81 acc=c98296_g1_i3:1:245:3:+ go=GO:0005524,GO:0016021,GO:0055085,GO:0006810,GO:0042626 interpro_raw=IPR011527 id=c98296_g1_i3:1:245:3:+ interpro_domain=IPR011527 def=IPR011527:ABC transporter type 1, transmembrane domain;	82.72	1	1	5	5	5.24809	6.25467	5.0488		8.5369	49.38	77.78	30.86		46.91	1	1	1		2	81	8.88454	9.90576
c74855_g1_i1:1:644:1:+	len=214 acc=c74855_g1_i1:1:644:1:+ interpro_domain=IPR027409,IPR027413 id=c74855_g1_i1:1:644:1:+ interpro_raw=IPR027413,IPR002423,IPR027409,IPR001844 interpro_family=IPR002423 go=GO:0005524,GO:0042026,GO:0005737 def=IPR002423:Chaperonin Cpn60/TCP-1 family; IPR027409:GroEL-like apical domain; IPR027413:GroEL-like equatorial domain;	82.71	1	11	22	22	16.0166	19.7621	30.434	28.9364	50.9191	42.99	39.72	34.11	68.69	65.89	3	4	5	4	6	214	23.0521	5.2749
CL905Contig1:452:2083:2:+	len=544 acc=CL905Contig1:452:2083:2:+ ec=6.3.4.14 id=CL905Contig1:452:2083:2:+ interpro_domain=IPR011764 go=GO:0005524,GO:0008152,GO:0046872,GO:0003824,GO:0004075 interpro_family=IPR006284 interpro_raw=IPR011764,IPR005479,IPR011054,IPR013816,IPR005482,IPR005481,IPR016185,IPR011761,IPR013815 def=IPR006284:Glutathione synthetase, prokaryotic; IPR011764:Biotin carboxylation domain;	82.69	1	1	32	35	51.7951	63.909	2.34369	51.4428	55.7645	58.2	57.64	2.76	39.78	23.2	9	11	1	7	6	543	59.8792	8.6167
c105106_g1_i3:83:2944:2:+	len=954 acc=c105106_g1_i3:83:2944:2:+ id=c105106_g1_i3:83:2944:2:+ interpro_domain=IPR027417 ec=6.3.4.3,1.5.1.5 pathways=MetaCyc:PWY-2161,MetaCyc:PWY-2201,KEGG:ec00720+6.3.4.3,MetaCyc:PWY-5030,MetaCyc:PWY-6613,UniPathway:UPA00193,KEGG:ec00720+1.5.1.5,KEGG:ec00670+6.3.4.3,MetaCyc:PWY-3841,KEGG:ec00670+1.5.1.5,MetaCyc:PWY-5497,MetaCyc:PWY-1722 interpro_raw=IPR020630,IPR027417,IPR016040,IPR020628,IP…	82.69	2	32	98	117	156.725	122.131	121.333	121.317	200.388	55.19	39.77	45.75	43.13	58.76	29	20	17	18	23	953	102.831	8.83643
c87288_g1_i1:1:472:3:+	len=156 acc=c87288_g1_i1:1:472:3:+ interpro_raw=IPR001807,IPR014743 go=GO:0005216,GO:0016020,GO:0006821,GO:0055085,GO:0005247 interpro_family=IPR001807 id=c87288_g1_i1:1:472:3:+ def=IPR001807:Chloride channel, voltage gated;	82.69	1	6	9	15	20.0485	15.4381	1.75918	3.51249	15.1962	64.74	80.13	7.69	39.1	50	3	4	1	2	2	156	17.304	9.72998
c105554_g2_i2:2200:4020:1:+	len=607	82.67	3	31	80	106	216.548	125.214	85.9725	71.1587	108.383	50	33	44.88	40.26	53.63	28	16	17	12	19	606	66.69	6.26514
c65749_g1_i1:104:330:2:+	len=75 acc=c65749_g1_i1:104:330:2:+ ec=4.6.-.- interpro_domain=IPR001054 id=c65749_g1_i1:104:330:2:+ go=GO:0035556,GO:0016849,GO:0009190 interpro_raw=IPR001054 def=IPR001054:Adenylyl cyclase class-3/4/guanylyl cyclase;	82.67	1	2	2	2	4.30889	7.78815				41.33	82.67	0			1	1				75	8.90548	6.53662
c99611_g1_i1:144:1547:3:+	len=468 acc=c99611_g1_i1:144:1547:3:+ interpro_raw=IPR011701,IPR020846 go=GO:0016021,GO:0055085 interpro_family=IPR011701 id=c99611_g1_i1:144:1547:3:+ interpro_domain=IPR020846 def=IPR011701:Major facilitator superfamily; IPR020846:Major facilitator superfamily domain;	82.66	1	18	36	41	88.3252	17.0703	24.6784	23.2813	86.132	65.52	30.19	48.39	29.98	51.18	15	4	6	4	9	467	51.728	7.43018
CL1592Contig1:403:1476:1:+	len=358 acc=CL1592Contig1:403:1476:1:+ interpro_raw=IPR023395,IPR018108 = interpro_domain=IPR023395 id=CL1592Contig1:403:1476:1:+ def=IPR023395:Mitochondrial carrier domain;	82.63	1	11	29	31	9.66114	32.9052	43.4768	27.8853	26.663	35.01	43.42	62.75	45.94	37.82	3	8	7	6	6	357	39.5258	9.01221
c100940_g4_i1:679:1179:1:+	len=167 acc=c100940_g4_i1:679:1179:1:+ interpro_domain=IPR016040 id=c100940_g4_i1:679:1179:1:+ pathways= interpro_family=IPR026055 go=GO:0080019 interpro_raw=IPR016040,IPR026055,IPR013120 def=IPR016040:NAD(P)-binding domain; IPR026055:Fatty acyl-CoA reductase;	82.63	1	3	5	10	11.5879	22.6015	14.0352	8.72846	3.75819	30.54	30.54	58.08	38.32	24.55	2	1	2	2	1	167	18.517	9.29053
c96507_g2_i2:1:710:2:+	len=236 acc=c96507_g2_i2:1:710:2:+ interpro_raw=IPR027359,IPR005821,IPR028823 interpro_family=IPR028823 go=GO:0005261,GO:0055085,GO:0016020,GO:0006811,GO:0005216 interpro_domain=IPR027359,IPR005821 id=c96507_g2_i2:1:710:2:+ def=IPR005821:Ion transport domain; IPR027359:Voltage-dependent channel, four helix bundle domain; IPR028823:Sodium leak channel non-selective protein;	82.63	1	1	11	14		4.45344	5.92851	15.2825	37.643	0	19.49	27.12	63.14	71.61		1	1	2	6	236	27.2116	9.80322
c109887_g1_i1:103:243:1:+	len=47	82.61	1	1	2	2	9.61033	3.91685				82.61	58.7				1	1				46	5.14244	5.59229
c32343_g1_i1:1:210:3:+	len=69 acc=c32343_g1_i1:1:210:3:+ id=c32343_g1_i1:1:210:3:+ interpro_domain=IPR020683 interpro_raw=IPR002110,IPR020683 go=GO:0005515 def=IPR020683:Ankyrin repeat-containing domain;	82.61	1	1	2	2		4.77654		3.98095			82.61		47.83			1		1		69	7.35552	4.94482
CL8969Contig1:453:918:3:+	len=155 acc=CL8969Contig1:453:918:3:+ id=CL8969Contig1:453:918:3:+ interpro_raw=IPR018186,IPR001699,IPR008967 interpro_family=IPR001699 go=GO:0005634,GO:0006355,GO:0003700 def=IPR001699:Transcription factor, T-box;	82.58	1	1	11	12	7.35968	26.5812		6.57025	7.84905	32.9	82.58		43.23	31.61	2	6		1	2	155	17.3715	6.94678
c101585_g1_i2:2383:2832:1:+	len=150	82.55	2	2	6	6	8.65387	7.89884	3.67238			35.57	52.35	36.24			2	2	2			149	17.3891	10.7261
c98472_g1_i1:1:312:1:+	len=104 acc=c98472_g1_i1:1:312:1:+ interpro_domain=IPR002589 id=c98472_g1_i1:1:312:1:+ interpro_raw=IPR002589 def=IPR002589:Macro domain;	82.52	1	2	10	11	8.23229	10.3652	14.5758	17.4266	5.47071	48.54	37.86	77.67	77.67	51.46	1	3	3	2	2	103	11.0848	8.29443
c101554_g3_i2:57:1019:3:+	len=321 acc=c101554_g3_i2:57:1019:3:+ id=c101554_g3_i2:57:1019:3:+ interpro_domain=IPR023215,IPR023214 interpro_raw=IPR023215,IPR006357,IPR023214 interpro_family=IPR006357 def=IPR006357:HAD-superfamily hydrolase, subfamily IIA; IPR023214:HAD-like domain; IPR023215:Nitrophenylphosphatase-like domain;	82.5	2	7	24	32	26.2332	16.0195	27.6138	48.7804	33.7675	51.56	26.25	30	37.19	73.75	5	3	4	6	7	320	35.5446	5.2876
c104346_g5_i1:1:483:2:+	len=160	82.5	1	9	17	25	21.3526	26.6554	17.9649	22.5124	5.012	55	76.88	57.5	54.37	23.75	4	7	4	4	1	160	16.6423	9.5249
c93209_g1_i1:97:699:1:+	len=201 acc=c93209_g1_i1:97:699:1:+ interpro_raw=IPR016177,IPR001739,IPR025884 go=GO:0005634,GO:0003677 interpro_domain=IPR025884,IPR016177 id=c93209_g1_i1:97:699:1:+ def=IPR016177:DNA-binding domain; IPR025884:Methyl-CpG binding protein 2/3, C-terminal domain;	82.5	1	2	15	25	21.1671	51.0394	53.3373	16.3483	26.4698	58	76	63	64.5	62.5	3	7	3	2	3	200	22.4149	9.29053
c103196_g2_i1:40:212:1:+	len=57 acc=c103196_g2_i1:40:212:1:+ id=c103196_g2_i1:40:212:1:+ interpro_domain=IPR015894,IPR030386 interpro_raw=IPR015894,IPR030386 go=GO:0005525,GO:0003924 def=IPR015894:Guanylate-binding protein, N-terminal; IPR030386:GB1/RHD3-type guanine nucleotide-binding (G) domain;	82.46	1	2	5	8	9.19419	3.72352	3.87703		12.6884	75.44	75.44	82.46		75.44	2	1	2		2	57	6.40519	6.23975
c106399_g2_i4:377:1354:2:+	len=326 acc=c106399_g2_i4:377:1354:2:+ id=c106399_g2_i4:377:1354:2:+ interpro_raw=IPR003689 interpro_family=IPR003689 go=GO:0030001,GO:0016020,GO:0055085,GO:0046873 def=IPR003689:Zinc/iron permease;	82.46	1	3	21	30	44.0643	40.2403	21.6293	2.5064	37.2441	53.54	49.85	40.31	4.92	58.46	7	7	4	1	7	325	34.1677	5.74463
c84298_g1_i1:1:343:2:+	len=114 acc=c84298_g1_i1:1:343:2:+ go=GO:0016787 interpro_raw=IPR003140,IPR029058 ec=3.-.-.- id=c84298_g1_i1:1:343:2:+ interpro_domain=IPR029058 def=IPR029058:Alpha/Beta hydrolase fold;	82.46	1	1	9	17	19.0007	17.1864	5.44727	10.9382	20.522	59.65	81.58	26.32	56.14	53.51	2	4	1	2	2	114	12.3973	4.99561
c89069_g1_i1:1:276:1:+	len=92 acc=c89069_g1_i1:1:276:1:+ interpro_raw=IPR005135 interpro_domain=IPR005135 id=c89069_g1_i1:1:276:1:+ def=IPR005135:Endonuclease/exonuclease/phosphatase;	82.42	1	1	3	5	3.9253	5.03333		6.20753	5.80367	65.93	82.42		48.35	48.35	1	1		1	1	91	10.2882	8.04541
c99867_g1_i1:1:549:1:+	len=183 acc=c99867_g1_i1:1:549:1:+ interpro_domain=IPR000620 id=c99867_g1_i1:1:549:1:+ go=GO:0016021,GO:0016020 interpro_raw=IPR000620 def=IPR000620:EamA domain;	82.42	1	1	8	14	17.6857	15.7738	3.74646	7.3696	15.0321	24.18	58.24	23.08	21.43	34.62	2	3	1	1	2	182	19.6857	8.77783
c100154_g2_i2:1:1199:3:+	len=399	82.41	2	74	83	110	115.978	129.708	102.018	23.0859	41.1505	73.37	60.8	54.77	26.38	36.68	30	29	22	10	10	398	44.3544	8.80713
c103432_g1_i10:290:1963:2:+	len=558 acc=c103432_g1_i10:290:1963:2:+ id=c103432_g1_i10:290:1963:2:+ interpro_domain=IPR016181 ec=2.3.1.108 interpro_raw=IPR016181,IPR007965 go=GO:0005874,GO:0019799,GO:0071929 interpro_family=IPR007965 def=IPR007965:Alpha-tubulin N-acetyltransferase; IPR016181:Acyl-CoA N-acyltransferase;	82.41	5	9	31	33	40.797	43.7452	15.0068	10.6774	23.5154	41.29	66.43	36.98	32.85	44.88	8	9	5	5	5	557	62.6229	9.68604
CL330Contig2:1815:3419:3:+	len=535 acc=CL330Contig2:1815:3419:3:+ ec=2.1.1.-,2.1.2.2,6.3.3.1 id=CL330Contig2:1815:3419:3:+ interpro_domain=IPR016188 go=GO:0006189,GO:0009058,GO:0003824,GO:0008168,GO:0016742,GO:0004641,GO:0004644,GO:0005737 interpro_family=IPR004733,IPR004607 interpro_raw=IPR004733,IPR004607,IPR001555,IPR002376,IPR010918,IPR016188,IPR000728 pathways=KEGG:ec00670+2.1.2.9,KEGG:ec00230+6.3.3.1,UniPathway:UPA00…	82.4	1	12	29	39	76.6024	15.4778	22.7725	17.5102	43.9567	60.11	29.21	46.82	29.4	61.24	10	4	6	5	7	534	57.1471	7.12256
c106094_g1_i5:606:1238:3:+	len=211	82.38	3	1	5	5	5.46723	19.9405		3.14072		20.48	71.9	0	17.62	0	2	2		1		210	24.0344	9.15869
c90388_g1_i1:233:1051:2:+	len=273 acc=c90388_g1_i1:233:1051:2:+ id=c90388_g1_i1:233:1051:2:+ interpro_domain=IPR013320 interpro_raw=IPR013320,IPR001791 def=IPR013320:Concanavalin A-like lectin/glucanase domain;	82.35	1	6	25	33	58.7659	38.9901	48.26	21.4708	43.0808	54.41	55.15	52.21	56.25	51.84	7	6	5	5	4	272	30.735	9.39307
c93272_g1_i1:445:651:1:+	len=69 acc=c93272_g1_i1:445:651:1:+ id=c93272_g1_i1:445:651:1:+ interpro_domain=IPR012336 interpro_raw=IPR012336,IPR013766,IPR005746 go=GO:0015035,GO:0006662,GO:0045454 interpro_family=IPR005746 def=IPR005746:Thioredoxin; IPR012336:Thioredoxin-like fold;	82.35	1	1	2	2	2.66519			3.54538		80.88			33.82		1			1		68	7.63881	4.56396
c98639_g1_i1:1:821:3:+	len=273	82.35	2	1	59	82	160.73	124.191	112.341	38.663	119.697	67.28	53.68	48.53	42.28	71.69	21	12	12	6	14	272	27.9361	10.9312
c99618_g2_i2:880:1137:1:+	len=86	82.35	1	2	2	3	2.667					82.35	0		0		2					85	10.128	6.52197
c105800_g1_i1:2691:3593:3:+	len=301	82.33	1	15	20	24	28.2747	28.9435	22.9664	17.7491	28.1242	50.67	56.33	50.67	42	39.33	6	5	4	4	4	300	33.4197	5.49072
c102798_g3_i10:75:467:3:+	len=131 acc=c102798_g3_i10:75:467:3:+ go=GO:0003333,GO:0016020,GO:0015171 interpro_family=IPR002293 interpro_raw=IPR002293 id=c102798_g3_i10:75:467:3:+ def=IPR002293:Amino acid/polyamine transporter I;	82.31	2	8	20	32	66.4738	31.4273	30.9784	17.1271	21.4918	63.85	81.54	64.62	54.62	49.23	9	5	5	3	4	130	13.6234	11.3999
CL5172Contig1:127:1044:1:+	len=306 acc=CL5172Contig1:127:1044:1:+ go=GO:0006810,GO:0016021 interpro_family=IPR009262 interpro_raw=IPR009262 id=CL5172Contig1:127:1044:1:+ def=IPR009262:Solute carrier family 35 member SLC35F1/F2/F6;	82.3	1	1	8	8	9.61319	5.83873		14.285	6.88215	37.7	21.64		50.16	16.39	3	1		3	1	305	33.94	7.69385
c75101_g1_i1:36:374:3:+	len=113	82.3	1	2	19	23	22.2432	15.6353	8.5831	22.4907	44.654	43.36	63.72	38.05	58.41	76.11	4	5	3	5	6	113	12.2029	4.13232
c91266_g4_i1:1:341:1:+	len=113 acc=c91266_g4_i1:1:341:1:+ interpro_domain=IPR013602 id=c91266_g4_i1:1:341:1:+ ec=3.6.1.3 interpro_raw=IPR026980,IPR026983,IPR013602 interpro_family=IPR026983 go=GO:0001539,GO:0007018,GO:0016887,GO:0005858,GO:0003777 def=IPR013602:Dynein heavy chain, domain-2; IPR026983:Dynein heavy chain;	82.3	1	2	15	18	20.1811	31.0742	16.2976	11.1556	20.3683	55.75	77.88	62.83	53.1	57.52	4	6	3	2	3	113	12.5685	8.71924
c102977_g1_i7:1:1374:1:+	len=458 acc=c102977_g1_i7:1:1374:1:+ go=GO:0022857,GO:0016020,GO:0055085,GO:0016021,GO:0022891 interpro_family=IPR005828 interpro_raw=IPR020846,IPR003663,IPR005828 pathways= id=c102977_g1_i7:1:1374:1:+ interpro_domain=IPR020846 def=IPR005828:General substrate transporter; IPR020846:Major facilitator superfamily domain;	82.28	1	8	59	90	114.096	63.8565	73.4692	88.3907	41.1354	47.92	68.05	50.98	50.33	47.92	21	13	14	11	9	457	51.2128	9.40771
c106042_g4_i1:140:750:2:+	len=203 acc=c106042_g4_i1:140:750:2:+ interpro_domain=IPR000313 id=c106042_g4_i1:140:750:2:+ interpro_raw=IPR000313 def=IPR000313:PWWP domain;	82.27	1	2	7	12	21.8548	7.47449	27.9786	21.5467	20.7857	65.02	17.24	31.03	60.1	33.5	3	1	1	2	3	203	23.0443	8.11865
c46179_g1_i1:1:191:3:+	len=63	82.26	1	1	4	4	4.40599			8.67536	4.9427	72.58			51.61	77.42	1			2	1	62	6.97741	5.14795
c92793_g1_i1:1:1068:3:+	len=355 acc=c92793_g1_i1:1:1068:3:+ interpro_raw=IPR027417,IPR031157,IPR005225,IPR000795 go=GO:0005525,GO:0003924 interpro_domain=IPR027417 id=c92793_g1_i1:1:1068:3:+ def=IPR027417:P-loop containing nucleoside triphosphate hydrolase; IPR031157:Tr-type G domain, conserved site;	82.25	1	2	11	12	17.2482	12.8894	14.5803			37.75	40.56	32.96	0	0	3	3	5			355	39.4692	6.45557
CL1916Contig1:1032:1355:3:+	len=108	82.24	1	15	23	37	11.7035	25.7554	36.3327	39.0021	10.6017	40.19	42.06	50.47	82.24	81.31	4	6	9	7	4	107	9.40716	4.42432
c94901_g3_i1:179:586:2:+	len=136	82.22	1	2	3	3		4.38163	8.0763			0	54.07	62.96	0			1	2			135	16.322	8.07471
CL4024Contig1:1:307:2:+	len=102	82.18	1	1	2	3	2.97529		3.56538			82.18	0	35.64		0	2		1			101	11.1344	5.2876
c64113_g1_i1:1:523:1:+	len=174 acc=c64113_g1_i1:1:523:1:+ interpro_family=IPR003938 go=GO:0006813,GO:0016020,GO:0005249 interpro_raw=IPR003938 id=c64113_g1_i1:1:523:1:+ def=IPR003938:Potassium channel, voltage-dependent, EAG/ELK/ERG;	82.18	2	1	14	15	26.1842	14.3816		4.75251	60.7522	45.4	72.41		29.31	66.67	4	3		1	6	174	19.9704	8.85107
CL6368Contig1:1:757:1:+	len=252 acc=CL6368Contig1:1:757:1:+ interpro_family=IPR017399 go=GO:0005515 interpro_raw=IPR017986,IPR019775,IPR001680,IPR015943,IPR020472 id=CL6368Contig1:1:757:1:+ def=IPR017399:WD repeat protein DCAF11/LEC14B;	82.14	1	12	17	19	24.3661	14.5143	13.0775	17.5752	2.70392	53.97	45.63	32.94	63.89	13.89	6	3	4	3	1	252	28.0811	8.70459
c104062_g2_i3:129:887:3:+	len=253 acc=c104062_g2_i3:129:887:3:+ interpro_family=IPR002347 go=GO:0008152,GO:0016491 interpro_raw=IPR020904,IPR002347,IPR016040,IPR002198 ec=1.-.-.- id=c104062_g2_i3:129:887:3:+ def=IPR002347:Glucose/ribitol dehydrogenase;	82.14	2	1	37	51	79.409	62.4989	47.7985	3.76275	109.285	74.21	59.52	55.56	11.51	72.62	13	8	7	1	12	252	26.1558	8.68994
c15763_g1_i1:44:379:2:+	len=112	82.14	1	11	15	16	10.0988	5.6633	23.0041	2.06076	33.2225	66.96	40.18	53.57	21.43	63.39	4	1	4	1	5	112	12.7867	7.04932
c90693_g1_i1:36:374:3:+	len=113	82.14	1	40	42	64	74.8909	56.5899	31.6926	23.0435	29.7193	77.68	75.89	71.43	77.68	79.46	15	15	13	6	7	112	11.613	4.7417
c105497_g2_i2:547:714:1:+	len=56	82.14	1	1	1	1					6.42075					82.14					1	56	6.49113	4.94482
c96393_g1_i1:337:708:1:+	len=124 acc=c96393_g1_i1:337:708:1:+ interpro_raw=IPR005336 interpro_family=IPR005336 go=GO:0006850,GO:0005743 id=c96393_g1_i1:337:708:1:+ def=IPR005336:Mitochondrial pyruvate carrier;	82.11	1	1	5	5	7.24926			4.05507	12.1825	35.77	0	0	37.4	82.11	2			1	2	123	14.2661	9.39307
c99007_g1_i1:24:1133:3:+	len=370 acc=c99007_g1_i1:24:1133:3:+ interpro_raw=IPR000215,IPR023796 interpro_family=IPR000215 go=GO:0005615 interpro_domain=IPR023796 id=c99007_g1_i1:24:1133:3:+ def=IPR000215:Serpin family; IPR023796:Serpin domain;	82.11	2	1	15	16	9.35214	28.0198	7.94902	14.4319	9.94247	15.18	59.35	17.07	24.39	29	2	6	2	3	2	369	40.6234	5.13525
c102578_g1_i1:351:1124:3:+	len=258	82.1	1	1	13	13	12.5089	10.0718	22.4788	6.86551	6.85825	27.24	46.3	46.69	31.52	27.24	2	4	3	3	1	257	27.4117	4.79248
c98747_g1_i4:97:903:1:+	len=269 acc=c98747_g1_i4:97:903:1:+ ec=3.4.21.- interpro_domain=IPR009003 id=c98747_g1_i4:97:903:1:+ interpro_family=IPR001314 go=GO:0006508,GO:0004252 interpro_raw=IPR009003,IPR001254,IPR018114,IPR001314 def=IPR001314:Peptidase S1A, chymotrypsin-type; IPR009003:Trypsin-like cysteine/serine peptidase domain;	82.09	1	1	9	9	3.79862		8.47763	6.84014	13.9052	54.48	0	29.48	13.81	16.42	3		2	1	3	268	29.4042	5.04639
c98953_g5_i1:1:205:2:+	len=68	82.09	1	1	1	1				5.41369					82.09					1		67	7.78601	8.6167
CL2817Contig1:1:519:1:+	len=173 acc=CL2817Contig1:1:519:1:+ interpro_domain=IPR000772 id=CL2817Contig1:1:519:1:+ interpro_raw=IPR000772 def=IPR000772:Ricin B lectin domain;	82.08	1	1	5	5		20.4465	3.64017	4.50228		0	65.32	32.37	34.1			3	1	1		173	19.75	9.74463
c104287_g1_i6:677:1966:2:+	len=430 acc=c104287_g1_i6:677:1966:2:+ id=c104287_g1_i6:677:1966:2:+ ec=2.4.1.- interpro_raw=IPR002213 interpro_family=IPR002213 go=GO:0016758,GO:0008152 def=IPR002213:UDP-glucuronosyl/UDP-glucosyltransferase;	82.05	1	2	21	35	77.9076	18.942	31.026	35.5423	36.6045	53.85	9.79	31.7	52.68	51.05	6	1	5	7	7	429	49.0906	8.98291
c100178_g1_i1:422:1843:2:+	len=474 acc=c100178_g1_i1:422:1843:2:+ interpro_domain=IPR019498,IPR023393 id=c100178_g1_i1:422:1843:2:+ interpro_family=IPR000799 go=GO:0008289 interpro_raw=IPR023393,IPR019498,IPR002913,IPR000799 def=IPR000799:Steroidogenic acute regulatory protein-like; IPR019498:MENTAL domain; IPR023393:START-like domain;	82.03	1	3	22	25	17.1596	21.2043	15.7931	14.4021	21.698	27.91	30.23	34.04	19.24	38.9	5	6	4	4	3	473	54.3675	6.7417
c78160_g1_i1:1:869:3:+	len=289 acc=c78160_g1_i1:1:869:3:+ interpro_domain=IPR003533,IPR005108 id=c78160_g1_i1:1:869:3:+ interpro_raw=IPR003533,IPR005108 go=GO:0035556 def=IPR003533:Doublecortin domain; IPR005108:HELP;	82.01	1	21	31	34	21.5907	17.9611	40.1711	35.6999	20.5032	35.99	37.72	62.98	47.4	51.21	6	6	10	5	5	289	32.1835	9.30518
c105865_g1_i7:1:337:2:+	len=112	81.98	1	1	4	4				7.42847	15.9884				51.35	72.07				2	2	111	12.7284	8.27979
c100554_g6_i1:89:1006:2:+	len=306 acc=c100554_g6_i1:89:1006:2:+ interpro_domain=IPR023591 id=c100554_g6_i1:89:1006:2:+ interpro_raw=IPR027498,IPR023591,IPR001865,IPR005707,IPR018130 interpro_family=IPR027498,IPR001865 go=GO:0015935,GO:0005622,GO:0005840,GO:0006412,GO:0003735 def=IPR001865:Ribosomal protein S2; IPR023591:Ribosomal protein S2, flavodoxin-like domain; IPR027498:Ribosomal protein S2, eukaryotic;	81.97	1	25	29	45	39.5858	16.8011	33.4835	8.73314	16.1502	46.56	31.15	44.92	22.3	43.93	9	8	11	4	6	305	33.5642	5.19873
CL249Contig1:1478:2428:2:+	len=317 acc=CL249Contig1:1478:2428:2:+ id=CL249Contig1:1478:2428:2:+ interpro_domain=IPR023395 go=GO:0005743,GO:0055085 interpro_family=IPR002067 interpro_raw=IPR002167,IPR023395,IPR018108,IPR002067 def=IPR002067:Mitochondrial carrier protein; IPR023395:Mitochondrial carrier domain;	81.96	1	9	19	23	55.9509	24.5426	6.76939	6.49596	15.3691	75.32	57.59	15.19	21.2	54.43	11	4	1	2	3	316	34.9301	9.5249
CL2162Contig1:799:1233:1:+	len=145 acc=CL2162Contig1:799:1233:1:+ interpro_domain=IPR016181 id=CL2162Contig1:799:1233:1:+ interpro_raw=IPR002993,IPR016181 interpro_family=IPR002993 go=GO:0004857,GO:0008073 pathways= def=IPR002993:Ornithine decarboxylase antizyme; IPR016181:Acyl-CoA N-acyltransferase;	81.94	3	5	9	9	32.7253	12.7845			5.90711	81.94	54.86			42.36	5	2			2	144	15.5198	7.21045
CL6720Contig1:1:469:2:+	len=156	81.94	1	1	3	4	4.355	25.9768				11.61	81.94				1	3				155	18.1242	9.39307
c101137_g1_i2:356:790:2:+	len=145 acc=c101137_g1_i2:356:790:2:+ interpro_raw=IPR003033 id=c101137_g1_i2:356:790:2:+ interpro_domain=IPR003033 def=IPR003033:SCP2 sterol-binding domain;	81.94	2	3	11	13		15.1842	13.2545	6.45014	24.6878	0	48.61	39.58	22.22	75		2	4	2	4	144	15.5791	9.5249
CL595Contig1:683:1444:2:+	len=254	81.89	1	16	43	49	23.8795	34.006	42.1952	18.1048	62.6842	52.76	60.63	50	60.63	58.27	4	14	15	5	10	254	26.905	9.39307
c74632_g1_i1:1:549:3:+	len=182 acc=c74632_g1_i1:1:549:3:+ interpro_raw=IPR000873 go=GO:0008152,GO:0003824 interpro_domain=IPR000873 id=c74632_g1_i1:1:549:3:+ def=IPR000873:AMP-dependent synthetase/ligase;	81.87	1	1	19	25	28.7381	20.9929	17.7186	16.3934	4.32283	51.1	56.59	52.2	35.71	49.45	8	4	4	4	3	182	19.7419	8.35303
CL1462Contig1:79:792:1:+	len=238 acc=CL1462Contig1:79:792:1:+ interpro_domain=IPR011993 id=CL1462Contig1:79:792:1:+ interpro_raw=IPR011993,IPR012466 interpro_family=IPR012466 go=GO:0006897,GO:0016020 def=IPR011993:Pleckstrin homology-like domain; IPR012466:Adaptin ear-binding coat-associated protein 1 NECAP-1;	81.86	1	2	23	25	32.1134	24.6983	17.775	9.60095	41.1274	37.55	38.4	34.6	41.77	38.82	5	5	3	3	8	237	25.736	7.95752
c94719_g1_i1:326:973:2:+	len=216 acc=c94719_g1_i1:326:973:2:+ pathways= go=GO:0006913,GO:0003924,GO:0007264,GO:0005622,GO:0016020,GO:0005525,GO:0015031,GO:0007165,GO:0006886 interpro_family=IPR001806,IPR002041 interpro_raw=IPR001806,IPR003579,IPR002041,IPR003578,IPR005225,IPR027417,IPR020849 id=c94719_g1_i1:326:973:2:+ interpro_domain=IPR027417 def=IPR001806:Small GTPase superfamily; IPR002041:Ran GTPase; IPR027417:P-loo…	81.86	1	19	20	35	48.7177	29.2326	28.2018	14.882	10.6145	63.26	50.7	44.19	12.56	33.95	9	7	5	2	2	215	24.7096	7.48877
c102871_g3_i1:1:1309:2:+	len=436 acc=c102871_g3_i1:1:1309:2:+ interpro_raw=IPR003103 go=GO:0051087 interpro_domain=IPR003103 id=c102871_g3_i1:1:1309:2:+ def=IPR003103:BAG domain;	81.84	1	54	59	76	49.9449	64.8608	78.6732	21.4041	38.1933	34.25	56.09	59.31	21.61	30.57	13	17	21	7	10	435	49.0236	5.19873
CL1509Contig1:926:1159:2:+	len=78	81.82	1	1	5	5		8.6767		4.88723	3.01535	0	79.22		62.34	81.82		2		1	2	77	8.41715	4.83057
c104807_g1_i1:302:1393:2:+	len=364 acc=c104807_g1_i1:302:1393:2:+ interpro_family=IPR003767 go=GO:0008152,GO:0055114,GO:0016491 interpro_raw=IPR003767 ec=1.-.-.- id=c104807_g1_i1:302:1393:2:+ def=IPR003767:Malate/L-lactate dehydrogenase;	81.82	1	2	43	49	38.8779	68.5206	74.4532	38.1361	49.1579	43.53	73.28	57.85	37.47	66.12	7	13	11	5	10	363	38.5943	6.45557
c107839_g1_i1:1:235:3:+	len=77 acc=c107839_g1_i1:1:235:3:+ go=GO:0005524,GO:0005694,GO:0003677,GO:0006265,GO:0003916 = interpro_raw=IPR006691 ec=5.99.1.- id=c107839_g1_i1:1:235:3:+ def=IPR006691:DNA gyrase/topoisomerase IV, subunit A, C-terminal beta-pinwheel;	81.82	1	3	9	14	10.741	19.3969	8.20848	4.89327	14.7135	42.86	81.82	74.03	57.14	77.92	2	3	2	1	3	77	8.19633	6.63916
c74541_g1_i1:1:232:1:+	len=77 acc=c74541_g1_i1:1:232:1:+ go=GO:0003735,GO:0005840,GO:0003723,GO:0006412 interpro_family=IPR002222 interpro_raw=IPR020934,IPR023575,IPR002222 id=c74541_g1_i1:1:232:1:+ interpro_domain=IPR023575 def=IPR002222:Ribosomal protein S19/S15; IPR023575:Ribosomal protein S19, superfamily;	81.82	1	1	4	4	2.79999			5.28644	9.98617	28.57			45.45	67.53	1			1	2	77	8.61758	9.59814
c75736_g1_i1:118:449:1:+	len=110 acc=c75736_g1_i1:118:449:1:+ interpro_raw=IPR007648 interpro_family=IPR007648 go=GO:0045980,GO:0004857,GO:0005739 id=c75736_g1_i1:118:449:1:+ def=IPR007648:ATPase inhibitor, IATP, mitochondria;	81.82	1	1	21	26	17.0655	14.3788	13.9775	22.6251	20.798	45.45	46.36	59.09	60.91	40	5	4	4	6	4	110	12.3764	9.36377
c92079_g2_i2:1:334:2:+	len=111 acc=c92079_g2_i2:1:334:2:+ id=c92079_g2_i2:1:334:2:+ interpro_domain=IPR011992 go=GO:0005509 interpro_raw=IPR011992,IPR018247,IPR002048 def=IPR011992:EF-hand domain pair;	81.82	1	2	10	12	3.13447	3.53974	23.2624	7.96964	17.7701	31.82	19.09	81.82	43.64	70	1	1	5	2	3	110	12.2871	4.55127
c97243_g3_i1:1:1422:1:+	len=474 acc=c97243_g3_i1:1:1422:1:+ go=GO:0022857,GO:0055085,GO:0016021 interpro_family=IPR005828 interpro_raw=IPR020846,IPR005828 id=c97243_g3_i1:1:1422:1:+ interpro_domain=IPR020846 def=IPR005828:General substrate transporter; IPR020846:Major facilitator superfamily domain;	81.82	1	17	26	29	36.3766	49.247	2.32527	18.5376	45.6447	57.51	49.05	4.02	29.6	49.47	7	8	1	4	7	473	52.6877	7.82568
c101713_g3_i1:1:332:2:+	len=110 acc=c101713_g3_i1:1:332:2:+ ec=1.-.-.- id=c101713_g3_i1:1:332:2:+ interpro_family=IPR002347 go=GO:0016491 interpro_raw=IPR016040,IPR002347,IPR020904 def=IPR002347:Glucose/ribitol dehydrogenase;	81.82	2	1	5	6		3.33899	2.68045		17.8258		58.18	50		57.27		2	2		2	110	12.0185	9.39307
c33613_g1_i1:31:328:1:+	len=99 acc=c33613_g1_i1:31:328:1:+ id=c33613_g1_i1:31:328:1:+ go=GO:0007034 interpro_family=IPR005024 interpro_raw=IPR005024 def=IPR005024:Snf7 family;	81.82	1	5	10	11		9.92736	13.335	7.29583	6.37368		59.6	68.69	43.43	44.44		3	4	2	2	99	11.1666	5.24951
c104882_g1_i2:160:1398:1:+	len=413	81.8	1	1	24	24	27.7808	42.3582	9.93999	29.8017	48.8582	47.82	71.6	13.35	39.08	48.79	5	8	2	3	6	412	47.1793	6.75635
c99009_g1_i1:180:2288:3:+	len=703 acc=c99009_g1_i1:180:2288:3:+ interpro_domain=IPR015880 id=c99009_g1_i1:180:2288:3:+ interpro_raw=IPR007087,IPR027008,IPR026807,IPR015880 interpro_family=IPR027008 go=GO:0010468,GO:0046872,GO:0000122,GO:0048749,GO:0048730 def=IPR015880:Zinc finger, C2H2-like; IPR027008:Teashirt family;	81.79	1	9	31	33	13.8971	34.5958	29.8567	39.6908	22.4999	21.05	53.34	47.8	32.15	26.32	3	10	8	8	3	703	76.5903	8.85107
c103088_g4_i1:113:1663:2:+	len=517 acc=c103088_g4_i1:113:1663:2:+ ec=3.4.11.- id=c103088_g4_i1:113:1663:2:+ pathways=MetaCyc:PWY-5988,KEGG:ec00480+3.4.11.1,MetaCyc:PWY-6018 go=GO:0019538,GO:0030145,GO:0006508,GO:0004177,GO:0008235,GO:0005622,GO:0005737 interpro_family=IPR011356 interpro_raw=IPR011356,IPR000819 def=IPR011356:Leucine aminopeptidase/peptidase B;	81.78	2	56	58	115	135.741	108.959	79.8742	64.8177	46.223	66.47	70.16	56.4	35.47	40.89	27	21	17	11	9	516	55.2418	7.1665
c101512_g2_i1:1:1203:1:+	len=401 acc=c101512_g2_i1:1:1203:1:+ interpro_raw=IPR000215,IPR023796,IPR023795 interpro_family=IPR000215 go=GO:0005615 interpro_domain=IPR023796 id=c101512_g2_i1:1:1203:1:+ def=IPR000215:Serpin family; IPR023795:Serpin, conserved site; IPR023796:Serpin domain;	81.75	1	2	16	16	37.8738	6.13482	18.608	10.2962	25.3134	68.5	27	21	36.75	33.75	5	2	3	3	3	400	44.4663	9.18799
c81466_g2_i1:1:379:1:+	len=126	81.75	1	1	11	14	53.387	14.7736	3.82773	4.41541	5.22008	77.78	41.27	26.19	28.57	39.68	6	3	1	1	1	126	13.77	10.5356
c80291_g2_i1:1:350:3:+	len=116 acc=c80291_g2_i1:1:350:3:+ pathways=KEGG:ec00030+4.1.2.13,KEGG:ec00010+4.1.2.13,MetaCyc:PWY-5484,MetaCyc:PWY-1861,MetaCyc:PWY-6142,KEGG:ec00710+4.1.2.13,KEGG:ec00680+4.1.2.13,MetaCyc:PWY-7385,UniPathway:UPA00109,MetaCyc:PWY-1042,KEGG:ec00051+4.1.2.13 interpro_family=IPR000741 go=GO:0004332,GO:0003824,GO:0006096 interpro_raw=IPR013785,IPR000741,IPR029769 ec=4.1.2.13 interpro_domain=IPR0137…	81.74	1	1	6	22	22.6799	31.0567	66.482	6.58744		60	40	69.57	39.13		4	2	3	1		115	12.4343	9.39307
c104362_g1_i1:436:1371:1:+	len=312 acc=c104362_g1_i1:436:1371:1:+ go=GO:0005515 interpro_raw=IPR003591,IPR001611 = id=c104362_g1_i1:436:1371:1:+ def=IPR001611:Leucine-rich repeat; IPR003591:Leucine-rich repeat, typical subtype;	81.73	1	1	20	23	54.5954	27.796	9.14025	23.8568	41.1323	31.73	41.03	22.76	50.96	50	5	5	2	4	5	312	34.1709	5.51611
c68882_g1_i1:185:497:2:+	len=104 acc=c68882_g1_i1:185:497:2:+ id=c68882_g1_i1:185:497:2:+ interpro_family=IPR001930 go=GO:0008270,GO:0006508,GO:0008237 interpro_raw=IPR001930,IPR014782 def=IPR001930:Peptidase M1, alanine aminopeptidase/leukotriene A4 hydrolase;	81.73	1	1	4	4	7.13722	7.98161				65.38	75		0		2	2				104	11.7507	4.58936
c105777_g3_i3:279:805:3:+	len=175 acc=c105777_g3_i3:279:805:3:+ id=c105777_g3_i3:279:805:3:+ interpro_domain=IPR001478 interpro_raw=IPR001478 go=GO:0005515 def=IPR001478:PDZ domain;	81.71	3	1	6	7	3.9302	7.49231	12.3595	3.29578	14.7604	36.57	25.71	62.29	9.71	26.29	1	1	2	1	2	175	18.5768	7.54736
c87491_g1_i1:1:494:1:+	len=164 acc=c87491_g1_i1:1:494:1:+ ec=3.4.-.- id=c87491_g1_i1:1:494:1:+ go=GO:0008234,GO:0006508 interpro_family=IPR013128 interpro_raw=IPR013128,IPR000668 def=IPR013128:Peptidase C1A;	81.71	1	1	15	17	3.98156	21.4442	3.32951	10.6239	60.3596	28.66	58.54	15.85	50.61	78.66	1	4	1	2	8	164	18.1428	5.73193
c97339_g1_i2:2284:3663:1:+	len=460 acc=c97339_g1_i2:2284:3663:1:+ interpro_family=IPR011356 go=GO:0030145,GO:0019538,GO:0005737,GO:0005622,GO:0008235,GO:0004177,GO:0006508 interpro_raw=IPR023042,IPR008283,IPR000819,IPR011356 pathways=MetaCyc:PWY-5988,MetaCyc:PWY-6018,KEGG:ec00480+3.4.11.1 ec=3.4.11.- id=c97339_g1_i2:2284:3663:1:+ def=IPR011356:Leucine aminopeptidase/peptidase B;	81.7	1	12	40	68	101.956	54.4094	39.9268	16.1616	93.2704	67.97	47.28	42.92	23.53	68.19	14	10	7	3	14	459	49.086	8.48486
c103231_g2_i4:1:215:1:+	len=71 acc=c103231_g2_i4:1:215:1:+ interpro_domain=IPR020683 id=c103231_g2_i4:1:215:1:+ interpro_raw=IPR020683,IPR002110 go=GO:0005515 def=IPR020683:Ankyrin repeat-containing domain;	81.69	1	3	4	11	8.99726	5.77964	15.3652	10.7081	15.2135	43.66	81.69	57.75	57.75	59.15	1	1	2	2	3	71	7.25501	9.31982
c77021_g1_i1:1:214:2:+	len=71 acc=c77021_g1_i1:1:214:2:+ go=GO:0004842 interpro_raw=IPR000569 pathways=UniPathway:UPA00143 id=c77021_g1_i1:1:214:2:+ interpro_domain=IPR000569 def=IPR000569:HECT;	81.69	1	1	3	3	4.79748		2.74957		3.5893	47.89		25.35		81.69	1		1		1	71	8.12512	7.51807
c89245_g2_i1:1:642:1:+	len=214 acc=c89245_g2_i1:1:642:1:+ interpro_raw=IPR004668 go=GO:0015556,GO:0015740,GO:0016021 interpro_family=IPR004668 id=c89245_g2_i1:1:642:1:+ def=IPR004668:Anaerobic c4-dicarboxylate membrane transporter;	81.69	1	2	22	26	42.0165	19.2948	8.8877	30.6411	30.0834	52.11	65.73	46.48	33.8	49.3	7	5	3	5	4	213	23.4497	6.3667
c98333_g1_i1:1:855:1:+	len=285 acc=c98333_g1_i1:1:855:1:+ interpro_raw=IPR007854 id=c98333_g1_i1:1:855:1:+ interpro_domain=IPR007854 def=IPR007854:Pre-mRNA polyadenylation factor Fip1;	81.69	1	1	17	23	14.3479	36.1066	41.3952	14.2448	11.0989	38.73	27.11	58.45	45.42	30.63	3	4	8	2	2	284	31.2359	4.44971
CL177Contig2:578:3511:2:+	len=978 acc=CL177Contig2:578:3511:2:+ id=CL177Contig2:578:3511:2:+ interpro_domain=IPR013083,IPR001965 interpro_raw=IPR001965,IPR019786,IPR019787,IPR013083,IPR011011 go=GO:0008270,GO:0005515 def=IPR001965:Zinc finger, PHD-type; IPR013083:Zinc finger, RING/FYVE/PHD-type;	81.68	7	19	51	59	38.5951	69.2612	87.4625	30.5148	48.7392	21.19	61.72	45.65	20.47	24.77	7	16	14	9	8	977	103.367	8.96826
c102677_g2_i1:1:1364:3:+	len=454 acc=c102677_g2_i1:1:1364:3:+ interpro_raw=IPR009001,IPR004160,IPR027417,IPR004539,IPR009000,IPR000795,IPR031157,IPR004161 interpro_family=IPR004541,IPR004539 go=GO:0003746,GO:0005525,GO:0006414,GO:0005737,GO:0003924 interpro_domain=IPR027417 id=c102677_g2_i1:1:1364:3:+ def=IPR004539:Translation elongation factor EF1A, eukaryotic/archaeal; IPR004541:Translation elongation factor EFTu/EF1A,…	81.68	2	1	27	33	31.81	37.7586	26.2078	24.03	22.2952	46.8	36.87	43.05	25.61	27.81	6	7	8	6	3	453	50.0601	9.12939
c85524_g2_i1:1:365:3:+	len=121 acc=c85524_g2_i1:1:365:3:+ id=c85524_g2_i1:1:365:3:+ interpro_domain=IPR020846 pathways= interpro_raw=IPR005828,IPR003663,IPR020846 go=GO:0016020,GO:0022891,GO:0016021,GO:0055085,GO:0022857 interpro_family=IPR005828 def=IPR005828:General substrate transporter; IPR020846:Major facilitator superfamily domain;	81.67	1	2	25	33	40.2121	65.0525	9.94266		61.5542	81.67	75	39.17	0	79.17	7	9	2		10	120	13.4009	4.89404
c93157_g5_i1:1:720:1:+	len=240 acc=c93157_g5_i1:1:720:1:+ id=c93157_g5_i1:1:720:1:+ ec=3.6.1.3 interpro_raw=IPR026979,IPR026983 interpro_family=IPR026983 go=GO:0007018,GO:0003341,GO:0003777,GO:0016887,GO:0005858 def=IPR026983:Dynein heavy chain;	81.67	1	1	8	15	21.9722	16.2909	22.2041	11.2893	11.8056	49.58	47.5	61.67	29.17	45.42	3	2	3	2	2	240	26.8773	4.97021
c95304_g1_i1:150:872:3:+	len=241 acc=c95304_g1_i1:150:872:3:+ pathways= go=GO:0016021,GO:0043085,GO:0016485 interpro_family=IPR009294 interpro_raw=IPR009294 id=c95304_g1_i1:150:872:3:+ def=IPR009294:Gamma-secretase subunit Aph-1;	81.67	1	1	13	13	7.56991	9.73337	20.4973	12.9461	19.89	31.67	26.25	47.92	32.08	58.33	2	2	4	2	3	240	26.5251	8.45557
c98218_g1_i2:70:792:1:+	len=241 acc=c98218_g1_i2:70:792:1:+ interpro_raw=IPR015507,IPR002877,IPR029063 go=GO:0032259,GO:0001510,GO:0008168 interpro_family=IPR015507 id=c98218_g1_i2:70:792:1:+ interpro_domain=IPR029063 ec=2.1.1.- def=IPR015507:Ribosomal RNA large subunit methyltransferase E; IPR029063:S-adenosyl-L-methionine-dependent methyltransferase;	81.67	1	2	7	8	11.3439	24.9834	4.07572	2.70684		37.08	52.08	27.08	22.08		1	3	1	2		240	26.4916	9.23193
c101199_g1_i1:81:1424:3:+	len=448 acc=c101199_g1_i1:81:1424:3:+ pathways=MetaCyc:PWY-6892,MetaCyc:PWY-6823,MetaCyc:PWY-7250,UniPathway:UPA00266,KEGG:ec00730+2.8.1.7,MetaCyc:PWY-6891 go=GO:0003824,GO:0008152,GO:0031071,GO:0030170,GO:0006534 interpro_family=IPR016454,IPR019881 interpro_raw=IPR010240,IPR020578,IPR015421,IPR015422,IPR000192,IPR015424,IPR016454 ec=2.8.1.7 id=c101199_g1_i1:81:1424:3:+ interpro_domain=IPR015424 …	81.66	1	3	16	17	23.1946	11.843	3.18626	29.4872	36.1475	31.1	26.4	13.65	55.48	33.56	4	2	1	5	4	447	49.4981	7.85498
c96525_g1_i2:190:665:1:+	len=158 acc=c96525_g1_i2:190:665:1:+ id=c96525_g1_i2:190:665:1:+ interpro_family=IPR000618 go=GO:0042302 interpro_raw=IPR000618 def=IPR000618:Insect cuticle protein;	81.65	1	1	12	12	2.60356	8.28824	14.8486	9.71433	13.3089	23.42	23.42	58.23	37.34	60.13	1	2	4	2	3	158	16.9073	4.88135
CL9699Contig1:1892:2041:2:+	len=50	81.63	1	1	2	2	6.10524	3.38572				81.63	61.22				1	1				49	5.79799	8.49951
c103295_g1_i1:1:1407:3:+	len=468 acc=c103295_g1_i1:1:1407:3:+ go=GO:0046872 interpro_raw=IPR000571 interpro_domain=IPR000571 id=c103295_g1_i1:1:1407:3:+ def=IPR000571:Zinc finger, CCCH-type;	81.62	1	82	106	127	78.0116	179.127	119.313	86.5346	80.3579	57.91	58.76	64.1	48.08	41.03	20	32	26	21	18	468	50.8076	7.82568
c47925_g1_i1:1:264:2:+	len=87	81.61	1	4	4	7		7.1742	5.0258		5.09467		51.72	81.61	0	64.37		2	1		2	87	9.94176	4.75439
c96709_g1_i1:172:777:1:+	len=202 acc=c96709_g1_i1:172:777:1:+ id=c96709_g1_i1:172:777:1:+ interpro_family=IPR003388 interpro_raw=IPR003388 def=IPR003388:Reticulon;	81.59	1	1	11	25	13.9635	34.4448	4.56625	7.78353	53.8072	21.39	34.83	20.4	26.87	80.1	2	4	1	2	5	201	23.3523	8.68994
c102479_g1_i2:129:2672:3:+	len=848 acc=c102479_g1_i2:129:2672:3:+ interpro_domain=IPR025304,IPR004328 id=c102479_g1_i2:129:2672:3:+ interpro_raw=IPR004328,IPR025304 go=GO:0005515 def=IPR004328:BRO1 domain; IPR025304:ALIX V-shaped domain;	81.58	2	30	85	98	185.952	135.535	126.034	51.9685	129.093	61.04	51.48	43.21	50.3	43.45	27	19	11	13	20	847	94.3114	5.96045
c89239_g1_i1:1:229:2:+	len=76	81.58	1	1	9	14	19.0699	3.5298		19.3665	27.5133	80.26	42.11		80.26	80.26	2	1		4	5	76	8.18842	8.14795
c92652_g1_i1:78:1187:3:+	len=370 acc=c92652_g1_i1:78:1187:3:+ interpro_domain=IPR029061,IPR009014 id=c92652_g1_i1:78:1187:3:+ interpro_raw=IPR005476,IPR009014,IPR029061,IPR005475 interpro_family=IPR005478 go=GO:0008152,GO:0003824 def=IPR005478:Transketolase, bacterial-like; IPR009014:Transketolase, C-terminal/Pyruvate-ferredoxin oxidoreductase, domain II; IPR029061:Thiamin diphosphate-binding fold;	81.57	2	14	34	41	54.4104	51.683	31.1749	38.9528	31.6595	52.85	66.4	30.89	38.48	36.59	10	12	5	7	4	369	40.3188	7.15186
c96501_g1_i3:171:938:3:+	len=256	81.57	3	2	12	12	5.10663	6.04958	3.70609	5.009	18.9542	19.61	36.08	32.55	12.94	54.9	1	3	2	1	5	255	28.6064	8.86572
CL4666Contig1:355:1431:1:+	len=359 acc=CL4666Contig1:355:1431:1:+ id=CL4666Contig1:355:1431:1:+ interpro_raw=IPR017986,IPR001680,IPR019775,IPR020472,IPR015943 go=GO:0005515 interpro_family=IPR017252 def=IPR017252:Dynein regulator LIS1;	81.56	1	1	15	18	7.3659	18.5056	19.7915	7.34544	5.60146	26.54	58.38	32.12	19.83	32.4	2	7	3	2	2	358	39.7813	7.91357
c100184_g1_i2:1:1368:1:+	len=456 acc=c100184_g1_i2:1:1368:1:+ pathways=KEGG:ec00500+3.2.1.1 go=GO:0005975,GO:0043169,GO:0003824 interpro_family=IPR015902,IPR006046 interpro_raw=IPR017853,IPR006047,IPR006048,IPR006589,IPR006046,IPR015902,IPR013780,IPR013781 id=c100184_g1_i2:1:1368:1:+ def=IPR006046:Alpha amylase; IPR015902:Glycoside hydrolase, family 13;	81.54	2	2	34	51	40.2991	53.9617	22.4018	39.2166	37.4211	33.85	55.6	30.11	42.2	53.63	9	11	3	8	9	455	50.9801	7.6792
CL7710Contig1:133:1938:1:+	len=602 acc=CL7710Contig1:133:1938:1:+ interpro_raw=IPR003591,IPR025875,IPR005135,IPR001611 = go=GO:0005515 interpro_domain=IPR005135 id=CL7710Contig1:133:1938:1:+ def=IPR005135:Endonuclease/exonuclease/phosphatase;	81.53	2	1	23	24	13.7133	24.6247	22.2477	14.2098	16.067	17.47	32.11	24.79	22.63	37.77	4	6	6	3	5	601	68.4887	7.32764
c104921_g1_i1:15:956:3:+	len=314 acc=c104921_g1_i1:15:956:3:+ ec=1.2.1.- id=c104921_g1_i1:15:956:3:+ interpro_family=IPR020831 go=GO:0016620,GO:0050661,GO:0006006,GO:0055114,GO:0051287 interpro_raw=IPR016040,IPR020828,IPR020830,IPR006424,IPR020829,IPR020831 pathways=KEGG:ec00010+1.2.1.12,KEGG:ec00710+1.2.1.12,MetaCyc:PWY-5484,UniPathway:UPA00109,MetaCyc:PWY-6901,MetaCyc:PWY-1042,MetaCyc:PWY-7003 def=IPR020831:Glyceraldeh…	81.53	1	2	18	21	21.6546	16.7677	14.4412	14.1866	25.6962	43.31	55.41	33.12	16.24	37.9	5	4	3	4	5	314	33.4704	8.35303
c98639_g1_i2:242:1072:2:+	len=277	81.52	2	1	60	82	158.184	124.191	114.538	47.634	104.574	53.62	52.9	55.43	64.86	48.19	20	12	13	8	13	276	28.4835	11.0923
c103589_g2_i4:1:357:1:+	len=119 acc=c103589_g2_i4:1:357:1:+ id=c103589_g2_i4:1:357:1:+ interpro_family=IPR001283 interpro_raw=IPR001283,IPR014044 def=IPR001283:Cysteine-rich secretory protein, allergen V5/Tpx-1-related;	81.51	1	1	4	4		4.30851			9.20855	0	41.18	0	0	73.95		2			2	119	13.5344	7.44482
c43560_g1_i1:50:1104:2:+	len=351 acc=c43560_g1_i1:50:1104:2:+ interpro_family=IPR002423 go=GO:0042026,GO:0005737,GO:0005524 interpro_raw=IPR002423,IPR027413,IPR001844,IPR027409 interpro_domain=IPR027409,IPR027413 id=c43560_g1_i1:50:1104:2:+ def=IPR002423:Chaperonin Cpn60/TCP-1 family; IPR027409:GroEL-like apical domain; IPR027413:GroEL-like equatorial domain;	81.48	1	14	50	80	106.751	64.7984	48.1917	66.2147	141.559	54.99	52.99	74.36	49.29	54.42	16	9	8	11	17	351	37.0766	5.41455
c104582_g1_i1:107:2096:2:+	len=663 acc=c104582_g1_i1:107:2096:2:+ interpro_family=IPR022440 interpro_raw=IPR002035,IPR013694 id=c104582_g1_i1:107:2096:2:+ def=IPR022440:Conserved hypothetical protein CHP03788;	81.45	1	13	30	32	46.9923	42.7218	16.2434	10.5504	26.8688	43.89	55.2	17.19	19	31.07	8	10	4	3	6	663	73.4462	5.70654
c98558_g5_i1:1:505:2:+	len=168	81.44	1	5	5	6	12.7285			6.87778	10.0577	64.07		0	35.33	31.14	2			2	1	167	18.7558	4.88135
CL583Contig2:4231:5121:2:-	len=297 acc=CL583Contig2:4231:5121:2:- interpro_raw=IPR006140,IPR016040 go=GO:0055114,GO:0051287 id=CL583Contig2:4231:5121:2:- interpro_domain=IPR016040 def=IPR016040:NAD(P)-binding domain;	81.42	4	1	11	11	4.53961	12.3104	3.10503	10.4873	15.875	28.72	28.04	21.62	24.66	36.15	2	3	1	2	3	296	33.7785	7.51807
c104283_g1_i4:124:1950:1:+	len=609 acc=c104283_g1_i4:124:1950:1:+ = interpro_raw=IPR008160 id=c104283_g1_i4:124:1950:1:+ def=IPR008160:Collagen triple helix repeat;	81.41	2	51	199	274	196.952	427.878	209.03	190.253	209.631	56.09	75.49	64.47	63.98	68.09	41	74	40	39	32	608	61.894	8.104
c105041_g7_i1:28:288:1:+	len=87	81.4	1	1	4	4	3.70588		7.62114	5.00251		33.72		81.4	26.74		1		2	1		86	9.35852	5.36377
c93859_g2_i1:95:484:2:+	len=130 acc=c93859_g2_i1:95:484:2:+ id=c93859_g2_i1:95:484:2:+ interpro_domain=IPR029071 go=GO:0003735,GO:0005840,GO:0005515,GO:0006412 interpro_family=IPR001975,IPR019956 interpro_raw=IPR019956,IPR029071,IPR000626,IPR001975,IPR019954 def=IPR001975:Ribosomal protein L40e; IPR019956:Ubiquitin; IPR029071:Ubiquitin-related domain;	81.4	8	2	3	6		13.2786	9.34602	13.6457	9.61874	0	58.91	58.91	81.4	58.91		2	1	2	1	129	14.794	9.78857
c99611_g2_i1:63:1547:3:+	len=495 acc=c99611_g2_i1:63:1547:3:+ id=c99611_g2_i1:63:1547:3:+ interpro_domain=IPR020846 interpro_raw=IPR020846,IPR011701 go=GO:0055085,GO:0016021 interpro_family=IPR011701 def=IPR011701:Major facilitator superfamily; IPR020846:Major facilitator superfamily domain;	81.38	1	1	45	57	110.345	94.7437	75.7442	37.5522	53.9491	55.06	54.86	51.62	44.74	58.5	14	11	9	7	8	494	54.691	6.63916
c103659_g5_i1:27:512:3:+	len=162	81.37	1	9	13	21	4.24091	6.61439	33.5961	29.8482	8.99645	26.71	27.33	78.26	55.9	55.28	1	3	6	4	3	161	16.1252	8.29443
c102581_g1_i1:221:1009:2:+	len=263 acc=c102581_g1_i1:221:1009:2:+ id=c102581_g1_i1:221:1009:2:+ interpro_domain=IPR027417,IPR001752 go=GO:0008017,GO:0005871,GO:0003777,GO:0007018,GO:0005524 interpro_family=IPR027640 interpro_raw=IPR027640,IPR001752,IPR027417 def=IPR001752:Kinesin motor domain; IPR027417:P-loop containing nucleoside triphosphate hydrolase; IPR027640:Kinesin-like protein;	81.37	1	3	7	7		12.77	10.0304		8.84357		55.51	39.16		49.81		3	2		2	263	29.4371	8.49951
CL4420Contig1:199:376:1:+	len=59	81.36	1	2	5	7	4.83164	9.79091	7.83915	4.31904	4.49461	66.1	76.27	76.27	44.07	64.41	1	2	2	1	1	59	6.99658	7.7085
CL2631Contig1:166:1389:1:+	len=408 acc=CL2631Contig1:166:1389:1:+ interpro_raw=IPR015943,IPR020472,IPR019775,IPR001680,IPR017986 interpro_family=IPR016391 go=GO:0005515 id=CL2631Contig1:166:1389:1:+ def=IPR016391:Coatomer alpha subunit;	81.33	2	8	33	37	31.2604	18.0067	61.5133	35.2776	35.6468	52.33	32.68	60.93	28.75	33.66	6	4	12	6	6	407	45.1202	8.90967
c104488_g3_i3:1:452:2:+	len=150 acc=c104488_g3_i3:1:452:2:+ ec=1.-.-.- id=c104488_g3_i3:1:452:2:+ interpro_family=IPR002347 go=GO:0008152,GO:0016491 interpro_raw=IPR016040,IPR020904,IPR002347,IPR002198 def=IPR002347:Glucose/ribitol dehydrogenase;	81.33	1	7	24	41	91.3349	31.12	43.7125	43.3388	62.969	62	45.33	46	54.67	74.67	10	4	4	3	8	150	16.3217	9.21729
c105588_g2_i1:1:1401:1:+	len=467	81.33	1	76	84	115	75.8518	160.633	90.3213	57.2142	64.3439	60.52	55.15	66.31	55.79	41.42	19	31	24	9	11	466	50.2815	8.27979
c95263_g3_i1:1:227:3:+	len=75 acc=c95263_g3_i1:1:227:3:+ interpro_raw=IPR009262 go=GO:0016021,GO:0006810 interpro_family=IPR009262 id=c95263_g3_i1:1:227:3:+ def=IPR009262:Solute carrier family 35 member SLC35F1/F2/F6;	81.33	1	1	5	6	14.0204	10.5293		5.99438		77.33	81.33		57.33		2	2		1		75	8.17958	5.8335
c102021_g2_i2:1:228:1:+	len=76	81.33	1	1	1	1					5.29712					81.33					1	75	8.64854	9.14404
CL1079Contig2:675:1721:3:+	len=349 acc=CL1079Contig2:675:1721:3:+ interpro_raw=IPR013149,IPR016040,IPR011032,IPR002085 interpro_family=IPR014190,IPR002085 go=GO:0016491,GO:0008270,GO:0055114 interpro_domain=IPR016040 id=CL1079Contig2:675:1721:3:+ ec=1.-.-.- def=IPR002085:Alcohol dehydrogenase superfamily, zinc-type; IPR014190:Leukotriene B4 12-hydroxydehydrogenase/15-oxo-prostaglandin 13-reductase; IPR016040:NAD(P)-binding…	81.32	2	2	18	22	30.2552	42.1575	22.9635	6.91468	26.8614	34.2	55.75	29.6	18.1	66.38	3	7	3	2	5	348	38.3485	8.5874
c99978_g1_i1:1:276:1:+	len=92	81.32	1	1	2	2		5.26751		3.61303			43.96		60.44			1		1		91	10.8114	5.63037
c100698_g1_i2:254:848:2:+	len=198	81.31	1	2	8	10	3.14558	13.2035	9.206	5.44026	16.0934	9.6	65.15	39.39	16.16	42.42	1	4	1	1	2	198	22.2063	4.84326
c94504_g1_i1:1:597:1:+	len=199 acc=c94504_g1_i1:1:597:1:+ pathways= interpro_family=IPR020831 go=GO:0016620,GO:0055114 interpro_raw=IPR020830,IPR020829,IPR020831 ec=1.2.1.- id=c94504_g1_i1:1:597:1:+ def=IPR020831:Glyceraldehyde/Erythrose phosphate dehydrogenase family;	81.31	1	1	12	17	10.36	12.2829	4.17062	19.9332	28.1491	49.49	70.2	8.59	40.4	64.14	2	3	1	4	4	198	20.8607	6.99072
c98383_g1_i3:1:1191:1:+	len=397 acc=c98383_g1_i3:1:1191:1:+ id=c98383_g1_i3:1:1191:1:+ interpro_family=IPR002490 go=GO:0033179,GO:0015991,GO:0015078 interpro_raw=IPR002490 def=IPR002490:V-type ATPase, V0 complex, 116kDa subunit family;	81.31	1	3	38	51	41.9599	51.8368	45.5076	36.0112	77.3351	40.91	39.39	29.04	38.13	57.58	7	8	7	7	13	396	45.6862	6.52197
CL1161Contig2:2033:2452:2:-	len=140 acc=CL1161Contig2:2033:2452:2:- id=CL1161Contig2:2033:2452:2:- interpro_domain=IPR013813 go=GO:0019239 interpro_family=IPR006175 interpro_raw=IPR006175,IPR013813,IPR006056,IPR019897 def=IPR006175:YjgF/YER057c/UK114 family; IPR013813:Endoribonuclease L-PSP/chorismate mutase-like;	81.29	1	1	7	8	2.79666	22.9736	6.47183			15.11	54.68	58.99	0		1	4	2			139	14.8968	6.78564
c97010_g1_i1:1:339:1:+	len=113	81.25	1	16	24	42	34.8739	9.01087	27.1846	189.229	5.99142	71.43	76.79	81.25	75.89	66.96	4	4	8	12	1	112	11.0303	10.0815
c99481_g1_i1:15:305:3:+	len=97	81.25	1	1	3	3			10.3622	5.73075				70.83	53.13				2	1		96	10.9524	5.8335
CL9261Contig1:135:872:3:+	len=246 acc=CL9261Contig1:135:872:3:+ interpro_raw=IPR007529,IPR006880,IPR029523 interpro_family=IPR029523 go=GO:0031011,GO:0006355,GO:0006338 interpro_domain=IPR007529,IPR006880 id=CL9261Contig1:135:872:3:+ def=IPR006880:INO80 complex subunit B-like conserved region; IPR007529:Zinc finger, HIT-type; IPR029523:INO80 complex, subunit Ies2;	81.22	1	3	8	8	2.74681	10.245	7.14471		12.019	41.22	21.63	19.18	0	35.1	2	3	2		1	245	27.4174	9.70068
c104711_g1_i3:1:1186:2:+	len=395 acc=c104711_g1_i3:1:1186:2:+ pathways=MetaCyc:PWY-6832,KEGG:ec00440+2.6.1.37 interpro_raw=IPR015422,IPR015421,IPR000192,IPR024169,IPR015424 go=GO:0003824,GO:0008152 interpro_family=IPR024169 id=c104711_g1_i3:1:1186:2:+ interpro_domain=IPR015424 def=IPR015424:Pyridoxal phosphate-dependent transferase; IPR024169:Serine-pyruvate aminotransferase/2-aminoethylphosphonate-pyruvate transaminase;	81.22	1	5	29	32	64.0719	40.9719	55.9794	4.19568	39.4745	58.63	59.14	53.3	5.84	37.56	10	6	7	1	6	394	43.8043	6.97607
c91729_g1_i1:158:655:2:+	len=166 acc=c91729_g1_i1:158:655:2:+ id=c91729_g1_i1:158:655:2:+ interpro_raw=IPR001790,IPR022973,IPR002363 interpro_family=IPR001790 go=GO:0005840,GO:0042254,GO:0003735,GO:0005622,GO:0006412 def=IPR001790:Ribosomal protein L10P;	81.21	1	1	4	4	5.40916	4.12644			2.90476	40.61	29.09		0	12.73	2	1			1	165	18.2747	6.59521
c94727_g2_i1:769:1170:1:+	len=134 acc=c94727_g2_i1:769:1170:1:+ id=c94727_g2_i1:769:1170:1:+ interpro_domain=IPR011011,IPR013083 go=GO:0005515,GO:0008270 interpro_raw=IPR019786,IPR001965,IPR011011,IPR013083,IPR019787 def=IPR011011:Zinc finger, FYVE/PHD-type; IPR013083:Zinc finger, RING/FYVE/PHD-type;	81.2	1	2	5	10		8.51479	11.2673	32.2585		0	75.94	47.37	78.95	0		2	1	4		133	14.6137	6.85889
c102813_g3_i4:81:1742:3:+	len=554 acc=c102813_g3_i4:81:1742:3:+ id=c102813_g3_i4:81:1742:3:+ interpro_domain=IPR029021 ec=3.1.3.41,3.1.3.48 interpro_raw=IPR000980,IPR000242,IPR029021,IPR016130,IPR000387,IPR003595 go=GO:0006470,GO:0016791,GO:0016311,GO:0004725 interpro_family=IPR012152 def=IPR012152:Protein-tyrosine phosphatase, non-receptor type-6, -11; IPR029021:Protein-tyrosine phosphatase-like;	81.19	4	10	38	43	47.1289	36.2538	57.4787	32.5431	49.8729	28.93	45.21	45.03	28.39	52.26	6	9	9	7	8	553	62.3142	8.79248
CL3670Contig1:251:1798:2:+	len=516 acc=CL3670Contig1:251:1798:2:+ interpro_raw=IPR005999,IPR018485,IPR018483,IPR018484,IPR000577 interpro_family=IPR000577 go=GO:0004370,GO:0016773,GO:0005975,GO:0006072 pathways=MetaCyc:PWY-4261,UniPathway:UPA00618,KEGG:ec00561+2.7.1.30 id=CL3670Contig1:251:1798:2:+ ec=2.7.1.30 def=IPR000577:Carbohydrate kinase, FGGY;	81.17	1	14	43	48	58.4757	46.3021	21.6388	35.5793	81.9994	65.05	47.96	37.28	29.9	52.62	11	9	5	6	13	515	55.9053	5.43994
CL8033Contig1:650:1114:2:+	len=155 acc=CL8033Contig1:650:1114:2:+ interpro_domain=IPR016135 id=CL8033Contig1:650:1114:2:+ interpro_raw=IPR016135,IPR000608 def=IPR016135:Ubiquitin-conjugating enzyme/RWD-like;	81.17	1	1	6	6		17.4757		3.45693	4.45461		72.08		38.96	18.83		4		1	1	154	17.4966	6.66846
c90464_g1_i1:1:367:2:+	len=122	81.15	1	1	7	7	5.5251	9.39805		1.34294	19.9829	45.08	67.21	0	11.48	79.51	2	2		1	2	122	14.1455	5.09717
CL9350Contig1:651:812:3:+	len=54	81.13	1	1	2	3	6.14883		3.13439	5.07602		81.13		32.08	81.13		1		1	1		53	5.82597	10.1548
c102609_g1_i1:1:163:2:+	len=54	81.13	1	1	2	3	3.77287			5.39093	4.86968	58.49			81.13	58.49	1			1	1	53	5.57498	9.49561
CL9557Contig1:278:439:2:+	len=54	81.13	1	1	1	1				4.89269					81.13					1		53	5.76722	11.6489
CL329Contig2:371:1389:2:+	len=339 acc=CL329Contig2:371:1389:2:+ interpro_raw=IPR001206,IPR016064,IPR002219 go=GO:0016301,GO:0035556 id=CL329Contig2:371:1389:2:+ interpro_domain=IPR016064,IPR001206,IPR002219 def=IPR001206:Diacylglycerol kinase, catalytic domain; IPR002219:Protein kinase C-like, phorbol ester/diacylglycerol-binding domain; IPR016064:NAD kinase/diacylglycerol kinase-like domain;	81.12	4	5	11	12	11.6279	3.7674	11.3302	12.0722	3.02747	30.09	25.66	13.27	25.07	7.37	2	2	3	3	1	339	37.4691	8.06006
c103082_g1_i1:173:1159:2:+	len=329 acc=c103082_g1_i1:173:1159:2:+ interpro_family=IPR029001 interpro_raw=IPR026534,IPR029001 id=c103082_g1_i1:173:1159:2:+ def=IPR029001:Inosine triphosphate pyrophosphatase-like;	81.1	3	20	33	35	66.5184	19.7293	21.6427	31.9229	33.1294	56.1	46.34	34.15	43.9	62.8	12	5	5	7	5	328	35.4021	4.89404
c103382_g1_i1:1:381:1:+	len=127 acc=c103382_g1_i1:1:381:1:+ go=GO:0007076,GO:0000796 interpro_family=IPR027120 interpro_raw=IPR027417,IPR003395,IPR027120 id=c103382_g1_i1:1:381:1:+ interpro_domain=IPR003395,IPR027417 def=IPR003395:RecF/RecN/SMC, N-terminal; IPR027120:Structural maintenance of chromosomes Smc2; IPR027417:P-loop containing nucleoside triphosphate hydrolase;	81.1	1	1	7	8	4.91263		19.243	26.6587		38.58	0	44.09	81.1	0	1		3	3		127	14.0383	5.22412
c94348_g1_i1:182:565:2:+	len=128 acc=c94348_g1_i1:182:565:2:+ interpro_raw=IPR004038,IPR004037,IPR018492,IPR029064,IPR002415 go=GO:0005730,GO:0003723,GO:0042254,GO:0030529 interpro_family=IPR018492 pathways= id=c94348_g1_i1:182:565:2:+ interpro_domain=IPR029064 def=IPR018492:Ribosomal protein L7Ae/L8/Nhp2 family; IPR029064:50S ribosomal protein L30e-like;	81.1	1	1	5	6	12.9275	2.95658	22.8293			59.06	18.9	63.78			2	1	3			127	14.0055	7.85498
CL7982Contig1:104:1042:2:+	len=313 acc=CL7982Contig1:104:1042:2:+ id=CL7982Contig1:104:1042:2:+ interpro_domain=IPR016040,IPR014089 go=GO:0048037,GO:0008152,GO:0003824 interpro_family=IPR005810 interpro_raw=IPR005811,IPR016040,IPR005810,IPR017440,IPR016102,IPR003781 pathways=KEGG:ec00720+6.2.1.5,MetaCyc:PWY-5538,KEGG:ec00640+6.2.1.5,UniPathway:UPA00223,MetaCyc:PWY-5690,MetaCyc:PWY-7384,MetaCyc:PWY-5913,KEGG:ec00660+6.2.1.5…	81.09	1	20	48	52	95.201	74.3829	61.6132	38.2803	43.3181	71.47	61.54	38.14	44.23	56.41	17	13	8	4	8	312	33.4636	9.43701
c103961_g1_i2:552:2264:3:+	len=571	81.09	1	9	30	34	21.2468	37.061	33.8811	17.7053	32.1781	45.71	38.53	45.36	29.6	44.13	6	7	8	5	6	571	61.3756	4.56396
c102798_g3_i8:64:510:1:+	len=149 acc=c102798_g3_i8:64:510:1:+ go=GO:0003333,GO:0015171,GO:0016020 interpro_family=IPR002293 interpro_raw=IPR002293 id=c102798_g3_i8:64:510:1:+ def=IPR002293:Amino acid/polyamine transporter I;	81.08	2	1	9	17	35.641	23.6809	32.0231	6.55446	6.11586	41.89	39.19	78.38	36.49	26.35	5	3	3	1	1	148	15.8302	7.72314
c99960_g1_i1:108:1505:3:+	len=466 acc=c99960_g1_i1:108:1505:3:+ interpro_domain=IPR013087 id=c99960_g1_i1:108:1505:3:+ interpro_raw=IPR007087,IPR013087 go=GO:0003676,GO:0046872 def=IPR013087:Zinc finger C2H2-type/integrase DNA-binding domain;	81.08	1	2	39	46	65.128	65.981	24.7072	26.1698	34.8823	37.63	54.62	23.66	46.02	32.47	11	14	5	8	5	465	48.6951	8.89502
CL1513Contig1:1:1350:1:+	len=450 acc=CL1513Contig1:1:1350:1:+ id=CL1513Contig1:1:1350:1:+ pathways= interpro_raw=IPR030198,IPR002259 interpro_family=IPR002259 go=GO:0016021,GO:0008504,GO:0006810,GO:0005337,GO:0055085 def=IPR002259:Equilibrative nucleoside transporter;	81.07	1	6	35	46	49.6653	52.0158	55.3336	31.5455	10.7185	43.21	43.88	44.1	36.08	22.05	9	9	11	6	2	449	49.4694	8.33838
c104046_g2_i1:1:1381:2:+	len=460	81.05	1	23	53	64	75.7052	99.3395	36.595	22.3661	42.5965	71.46	60.78	47.93	27.67	42.7	13	19	9	7	12	459	47.9597	5.12256
c77056_g1_i1:1:289:3:+	len=95	81.05	1	2	7	9	3.78627	4.00959	8.45951	5.22913	3.22022	63.16	43.16	43.16	32.63	33.68	2	1	3	2	1	95	10.8362	6.04932
c101097_g3_i2:570:920:3:+	len=117	81.03	1	4	5	5	2.85696	6.55726		10.0758	2.5917	41.38	68.97	0	46.55	13.79	1	1		2	1	116	12.5853	8.27979
CL167Contig2:4083:4970:3:-	len=296	81.02	1	2	10	10	4.96942	23.1466	8.05432		17.255	11.53	45.76	28.47	0	55.93	1	2	2		5	295	32.3498	9.74463
c104905_g2_i1:244:1320:1:+	len=359 acc=c104905_g2_i1:244:1320:1:+ interpro_domain=IPR000008 id=c104905_g2_i1:244:1320:1:+ interpro_raw=IPR000008 go=GO:0005515 def=IPR000008:C2 domain;	81.01	3	2	19	25	45.1797	17.958	6.48493	18.212	47.8633	44.97	26.26	20.11	41.34	67.32	8	3	1	3	8	358	40.4125	7.43018
c105810_g1_i3:478:1428:1:+	len=317	81.01	1	8	11	12	8.59754		8.01616	19.1935		37.97	0	28.48	34.81	0	5		2	4		316	36.527	8.6167
c77706_g1_i1:80:316:2:+	len=79 acc=c77706_g1_i1:80:316:2:+ id=c77706_g1_i1:80:316:2:+ interpro_raw=IPR004753 go=GO:0000902 interpro_family=IPR004753 def=IPR004753:Cell shape determining protein MreB/Mrl;	81.01	1	2	6	7	4.52141		11.0382	2.8345		63.29		46.84	37.97	0	3		2	1		79	8.20619	4.17041
c64046_g1_i1:1:302:1:+	len=100 acc=c64046_g1_i1:1:302:1:+ interpro_domain=IPR027417,IPR011545 id=c64046_g1_i1:1:302:1:+ interpro_raw=IPR027417,IPR011545 go=GO:0005524,GO:0003676 def=IPR011545:DEAD/DEAH box helicase domain; IPR027417:P-loop containing nucleoside triphosphate hydrolase;	81	1	1	4	5	6.08264	20.0414		7.93249	12.63	50	81		81	59	1	2		1	1	100	11.0578	5.45264
c76618_g1_i2:1:600:1:+	len=200 acc=c76618_g1_i2:1:600:1:+ interpro_raw=IPR003409 = id=c76618_g1_i2:1:600:1:+ def=IPR003409:MORN motif;	81	2	4	7	11	5.24735	2.86424	11.9084	12.139	2.09853	66.5	16.5	10.5	32	8.5	3	1	1	1	1	200	22.2854	5.93506
c99014_g2_i1:1:429:1:+	len=143 acc=c99014_g2_i1:1:429:1:+ interpro_raw=IPR016040,IPR002347,IPR020904 interpro_family=IPR002347 go=GO:0016491 id=c99014_g2_i1:1:429:1:+ ec=1.-.-.- def=IPR002347:Glucose/ribitol dehydrogenase;	80.99	2	1	4	4		9.2219	1.57198	9.1148			57.75	8.45	46.48			2	1	1		142	15.4151	5.98584
	>sp|BGAL_ECOLI|	80.96	1	16	41	53	56.1149	57.5783	33.6896	16.5196	15.6567	37.4	58.59	27.83	17.09	13.96	11	16	8	5	4	1024	116.409	5.50342
c104370_g2_i1:1:823:2:+	len=274 acc=c104370_g2_i1:1:823:2:+ pathways= go=GO:0006810,GO:0016020,GO:0005415 interpro_family=IPR008276 interpro_raw=IPR008276,IPR002668 id=c104370_g2_i1:1:823:2:+ def=IPR008276:Concentrative nucleoside transporter;	80.95	1	1	11	11	12.6896	17.2453			11.2193	35.53	60.81	0		49.82	3	4			4	273	30.3692	4.94482
c89167_g1_i1:1:441:1:+	len=147 acc=c89167_g1_i1:1:441:1:+ pathways=KEGG:ec00970+6.1.1.9 interpro_family=IPR002303 go=GO:0004832,GO:0004812,GO:0006418,GO:0000166,GO:0005524,GO:0006438 interpro_raw=IPR001412,IPR014729,IPR002300,IPR002303 ec=6.1.1.-,6.1.1.9 id=c89167_g1_i1:1:441:1:+ def=IPR002303:Valine-tRNA ligase;	80.95	1	2	14	23	38.7728	10.6612	18.7899	17.5071	8.20674	78.91	58.5	43.54	52.38	40.82	6	2	3	4	1	147	16.7906	8.67529
c102914_g3_i1:1:383:3:+	len=127 acc=c102914_g3_i1:1:383:3:+ interpro_family=IPR002347 interpro_raw=IPR002347,IPR016040 id=c102914_g3_i1:1:383:3:+ def=IPR002347:Glucose/ribitol dehydrogenase;	80.95	2	1	5	8		3.66073	13.9053	6.2992	2.51069		17.46	44.44	62.7	14.29		1	3	1	1	126	13.5844	6.80029
CL7750Contig1:976:2346:1:+	len=457 acc=CL7750Contig1:976:2346:1:+ pathways=KEGG:ec00980+3.3.2.9 interpro_raw=IPR010497,IPR029058,IPR000639,IPR000073,IPR016292 interpro_family=IPR000639 go=GO:0033961,GO:0003824 interpro_domain=IPR029058 id=CL7750Contig1:976:2346:1:+ ec=3.3.2.9 def=IPR000639:Epoxide hydrolase-like; IPR029058:Alpha/Beta hydrolase fold;	80.92	1	2	24	30	36.7729	27.0399	23.4551	38.7373	9.77736	51.32	34.65	25	40.79	13.6	7	6	5	7	1	456	51.4737	7.38623
c100004_g3_i1:136:1710:1:+	len=525 acc=c100004_g3_i1:136:1710:1:+ ec=2.4.1.- id=c100004_g3_i1:136:1710:1:+ go=GO:0008152,GO:0016758 interpro_family=IPR002213 interpro_raw=IPR002213 def=IPR002213:UDP-glucuronosyl/UDP-glucosyltransferase;	80.92	1	1	20	24	33.1078	38.8335	4.7081	18.822	25.6812	50.57	26.72	6.49	22.52	44.66	7	5	1	3	5	524	59.7901	8.6167
c97545_g2_i1:315:710:3:+	len=132 acc=c97545_g2_i1:315:710:3:+ interpro_raw=IPR001763 id=c97545_g2_i1:315:710:3:+ interpro_domain=IPR001763 def=IPR001763:Rhodanese-like domain;	80.92	1	1	8	11	20.4837	14.3932	10.1455	5.36367	8.50664	80.92	51.15	40.46	32.82	48.09	4	3	2	1	1	131	14.6315	7.82568
c100844_g1_i4:216:1286:3:+	len=357 acc=c100844_g1_i4:216:1286:3:+ id=c100844_g1_i4:216:1286:3:+ interpro_domain=IPR023395 interpro_raw=IPR023395,IPR002067,IPR018108 go=GO:0055085 interpro_family=IPR002067 def=IPR002067:Mitochondrial carrier protein; IPR023395:Mitochondrial carrier domain;	80.9	3	1	13	16		20.2708	16.6857	26.0298	17.2418		46.63	39.04	45.51	18.82		4	4	4	2	356	39.8509	9.99365
c15379_g1_i1:1:268:2:+	len=89 acc=c15379_g1_i1:1:268:2:+ interpro_domain=IPR029446 id=c15379_g1_i1:1:268:2:+ interpro_raw=IPR029446,IPR016460 interpro_family=IPR016460 go=GO:0005737,GO:0006886 def=IPR016460:Coatomer beta subunit (COPB1); IPR029446:Coatomer beta subunit, appendage platform domain;	80.9	1	1	3	3		3.66422			7.57897		28.09			80.9		1			2	89	10.1809	4.75439
c97916_g1_i1:1:205:1:+	len=68 acc=c97916_g1_i1:1:205:1:+ id=c97916_g1_i1:1:205:1:+ interpro_domain=IPR027417,IPR000432 go=GO:0030983,GO:0005524,GO:0006298 interpro_raw=IPR000432,IPR027417 def=IPR000432:DNA mismatch repair protein MutS, C-terminal; IPR027417:P-loop containing nucleoside triphosphate hydrolase;	80.88	1	1	2	2		3.76103			5.45723		80.88			69.12		1			1	68	7.62077	7.97217
c102276_g1_i4:1:1586:2:+	len=528 acc=c102276_g1_i4:1:1586:2:+ interpro_domain=IPR027417 id=c102276_g1_i4:1:1586:2:+ interpro_family=IPR004540 interpro_raw=IPR014721,IPR009000,IPR027417,IPR000640,IPR020568,IPR009022 def=IPR004540:Translation elongation factor EFG/EF2; IPR027417:P-loop containing nucleoside triphosphate hydrolase;	80.87	1	4	22	24	22.7238	12.5736	16.7766	26.8685	18.7347	34.09	14.39	21.21	39.77	27.84	5	3	4	7	3	528	58.6539	8.20654
c107846_g1_i1:1:349:2:+	len=116 acc=c107846_g1_i1:1:349:2:+ go=GO:0003824,GO:0016616,GO:0055114,GO:0005975,GO:0019752 interpro_family=IPR001557 interpro_raw=IPR022383,IPR015955,IPR001557 ec=1.1.1.- id=c107846_g1_i1:1:349:2:+ def=IPR001557:L-lactate/malate dehydrogenase;	80.87	1	2	9	10	9.58432	3.89244	7.86443	8.8579	8.26218	62.61	23.48	65.22	25.22	35.65	2	1	3	2	1	115	12.1902	4.75439
CL7917Contig1:251:1162:2:+	len=304 acc=CL7917Contig1:251:1162:2:+ interpro_raw=IPR013785,IPR002220 go=GO:0003824,GO:0008152,GO:0016829 interpro_family=IPR002220 id=CL7917Contig1:251:1162:2:+ interpro_domain=IPR013785 ec=4.-.-.- def=IPR002220:DapA-like; IPR013785:Aldolase-type TIM barrel;	80.86	1	1	29	37	55.8931	47.407	56.4845	5.99484	23.1208	63.7	75.25	65.68	25.41	61.72	7	10	9	2	3	303	32.905	8.57275
c94347_g3_i1:1:627:1:+	len=209	80.86	1	1	10	11	13.5035	39.6394		13.2717	22.7855	37.8	55.02		29.19	38.76	1	4		3	2	209	24.5307	5.69385
c86029_g1_i1:53:901:2:+	len=283 acc=c86029_g1_i1:53:901:2:+ interpro_raw=IPR020846 interpro_domain=IPR020846 id=c86029_g1_i1:53:901:2:+ def=IPR020846:Major facilitator superfamily domain;	80.85	1	15	32	49	111.054	54.8397	11.5498	28.6137	68.3377	78.37	47.16	31.91	42.2	51.77	13	7	2	5	9	282	31.7814	8.86572
c91948_g1_i1:346:1335:1:+	len=330 acc=c91948_g1_i1:346:1335:1:+ go=GO:0055114,GO:0051287,GO:0016616,GO:0008152 interpro_raw=IPR029753,IPR029752,IPR006139,IPR016040,IPR006140 ec=1.1.1.- interpro_domain=IPR016040,IPR006139 id=c91948_g1_i1:346:1335:1:+ def=IPR006139:D-isomer specific 2-hydroxyacid dehydrogenase, catalytic domain; IPR016040:NAD(P)-binding domain; IPR029752:D-isomer specific 2-hydroxyacid dehydrogenase, NAD-bi…	80.85	2	13	14	18	15.3529	33.7634	19.1037	16.8239	5.15319	28.57	56.53	45.59	53.5	8.81	2	7	3	4	1	329	35.2129	8.30908
c95024_g1_i1:1:300:1:+	len=100	80.81	1	1	4	9	4.308	10.4293	3.6029	9.40863	8.05705	42.42	68.69	42.42	80.81	42.42	1	2	1	2	1	99	10.7433	9.5249
CL3239Contig1:1:676:2:+	len=225 acc=CL3239Contig1:1:676:2:+ id=CL3239Contig1:1:676:2:+ interpro_domain=IPR011583,IPR029070,IPR017853 ec=3.2.1.14 interpro_raw=IPR017853,IPR029070,IPR001223,IPR013781,IPR011583 go=GO:0004568,GO:0006032,GO:0005975,GO:0004553 def=IPR011583:Chitinase II; IPR017853:Glycoside hydrolase superfamily; IPR029070:Chitinase insertion domain;	80.8	1	5	6	8	3.33246		11.8434	5.37403	5.13977	24.11	0	64.29	12.95	19.2	1		2	1	2	224	24.4847	4.43701
c101751_g1_i1:173:1909:2:+	len=579 acc=c101751_g1_i1:173:1909:2:+ go=GO:0004672,GO:0005524,GO:0006468 interpro_raw=IPR017441,IPR000719,IPR011009,IPR002290 id=c101751_g1_i1:173:1909:2:+ interpro_domain=IPR011009 def=IPR011009:Protein kinase-like domain;	80.8	2	25	37	44	51.0925	55.3183	36.1561	41.5357	46.8954	44.98	33.22	29.41	36.51	35.99	9	10	7	7	7	578	65.2943	8.41162
c83902_g2_i1:62:218:2:+	len=52 acc=c83902_g2_i1:62:218:2:+ interpro_raw=IPR011603 go=GO:0004591,GO:0030976,GO:0055114,GO:0006099 interpro_family=IPR011603 pathways=KEGG:ec00380+1.2.4.2,KEGG:ec00310+1.2.4.2,KEGG:ec00020+1.2.4.2,MetaCyc:PWY-5084 id=c83902_g2_i1:62:218:2:+ ec=1.2.4.2 def=IPR011603:2-oxoglutarate dehydrogenase E1 component;	80.77	1	1	1	1	2.3815					80.77		0	0		1					52	5.56485	6.44287
CL10017Contig1:1:407:1:+	len=135 acc=CL10017Contig1:1:407:1:+ go=GO:0035556,GO:0016849,GO:0009190 interpro_raw=IPR029787,IPR001054,IPR018297 ec=4.6.-.- interpro_domain=IPR029787 id=CL10017Contig1:1:407:1:+ def=IPR029787:Nucleotide cyclase;	80.74	1	1	8	10		10.8351	3.95275	15.2643	12.8614		40.74	45.93	69.63	46.67		3	1	3	2	135	14.7856	8.32373
c84276_g1_i1:115:444:1:+	len=110	80.73	1	5	6	8		3.63921	9.52706	4.82768			61.47	80.73	40.37	0		1	4	2		109	11.5125	4.29736
c82373_g1_i1:1:251:3:+	len=83	80.72	1	1	4	4	5.6661		3.1183		12.5512	55.42	0	18.07		80.72	1		1		2	83	9.66693	4.91943
c98373_g2_i1:1:500:2:+	len=166 acc=c98373_g2_i1:1:500:2:+ id=c98373_g2_i1:1:500:2:+ interpro_domain=IPR017452 pathways= go=GO:0007186,GO:0016021,GO:0004930 interpro_family=IPR000276 interpro_raw=IPR000276,IPR017452 def=IPR000276:G protein-coupled receptor, rhodopsin-like; IPR017452:GPCR, rhodopsin-like, 7TM;	80.72	1	1	10	12	10.669	6.70964	15.7951	9.27072	39.8912	71.08	35.54	44.58	45.78	46.39	3	2	2	1	3	166	18.7989	9.15869
c100473_g5_i3:198:1055:3:+	len=286 acc=c100473_g5_i3:198:1055:3:+ id=c100473_g5_i3:198:1055:3:+ interpro_family=IPR008516 interpro_raw=IPR008516 def=IPR008516:Na,K-Atpase Interacting protein;	80.7	2	6	7	10	3.3786	6.67231	3.5844	24.8351	24.5964	8.77	25.96	8.77	70.88	26.32	1	2	1	4	1	285	33.1578	8.39697
c93492_g1_i1:368:539:2:+	len=57 acc=c93492_g1_i1:368:539:2:+ interpro_domain=IPR022700 id=c93492_g1_i1:368:539:2:+ interpro_raw=IPR022700 def=IPR022700:Proteinase, regulatory CLIP domain;	80.7	1	1	1	1	3.51616					80.7					1					57	6.63218	4.80518
c97772_g3_i1:76:417:1:+	len=114 acc=c97772_g3_i1:76:417:1:+ go=GO:0004252,GO:0006508 interpro_raw=IPR001254,IPR018114,IPR009003 ec=3.4.21.- id=c97772_g3_i1:76:417:1:+ interpro_domain=IPR009003 def=IPR009003:Trypsin-like cysteine/serine peptidase domain;	80.7	1	1	4	4		7.91519	6.51147	3.38189			80.7	40.35	33.33	0		2	1	1		114	12.5343	5.80811
c100153_g3_i4:1:624:1:+	len=208 acc=c100153_g3_i4:1:624:1:+ go=GO:0000166 interpro_raw=IPR012677 interpro_domain=IPR012677 id=c100153_g3_i4:1:624:1:+ def=IPR012677:Nucleotide-binding alpha-beta plait domain;	80.68	1	11	38	63	52.6949	75.5082	37.9012	33.0577	97.2937	70.05	65.22	56.52	80.68	61.84	8	14	7	7	13	207	21.5505	6.91748
c105223_g3_i1:1:455:3:+	len=151	80.67	1	2	11	15	3.32854	10.8028	30.8964	34.7202		22.67	44.67	68.67	78.67	0	1	2	6	3		150	15.3983	5.38916
c84136_g1_i1:1:359:1:+	len=119 acc=c84136_g1_i1:1:359:1:+ id=c84136_g1_i1:1:359:1:+ interpro_family=IPR007632 interpro_raw=IPR007632 def=IPR007632:Anoctamin;	80.67	1	1	2	2		4.56236		5.35565			42.02		38.66			1		1		119	14.3274	8.67529
CL1093Contig1:119:679:2:+	len=187	80.65	1	2	11	15	13.0744	5.21685	3.99095	23.6566	13.4573	47.85	30.65	37.63	66.13	48.92	2	2	2	4	3	186	18.6661	12.6597
c88068_g1_i1:69:347:3:+	len=93 acc=c88068_g1_i1:69:347:3:+ id=c88068_g1_i1:69:347:3:+ ec=2.3.1.- interpro_raw=IPR007130 interpro_family=IPR007130 go=GO:0016747 def=IPR007130:Diacylglycerol acyltransferase;	80.65	1	2	6	7	18.8239				11.2617	80.65		0		70.97	4				2	93	10.6255	8.54346
c92286_g1_i3:52:519:1:+	len=156 acc=c92286_g1_i3:52:519:1:+ interpro_raw=IPR000988,IPR023441,IPR011017 interpro_family=IPR000988 id=c92286_g1_i3:52:519:1:+ interpro_domain=IPR023441 def=IPR000988:Ribosomal protein L24e-related; IPR023441:Ribosomal protein L24e domain;	80.65	2	3	5	7	4.52093		27.5766			18.06		80.65	0		1		4			155	17.6808	11.063
c65836_g1_i1:1:282:2:+	len=93 acc=c65836_g1_i1:1:282:2:+ ec=2.7.6.1 interpro_domain=IPR029057 id=c65836_g1_i1:1:282:2:+ interpro_family=IPR005946 go=GO:0004749,GO:0009165,GO:0000287 interpro_raw=IPR005946,IPR029057 pathways=KEGG:ec00030+2.7.6.1,UniPathway:UPA00087,KEGG:ec00230+2.7.6.1 def=IPR005946:Ribose-phosphate diphosphokinase; IPR029057:Phosphoribosyltransferase-like;	80.65	1	1	3	3		6.15455		4.17803	8.53018		59.14		37.63	53.76		1		1	1	93	9.82521	7.28369
c96342_g1_i1:66:641:3:+	len=192 acc=c96342_g1_i1:66:641:3:+ interpro_raw=IPR001370 id=c96342_g1_i1:66:641:3:+ interpro_domain=IPR001370 def=IPR001370:Baculoviral inhibition of apoptosis protein repeat;	80.63	4	1	4	4	10.1625	8.61506			1.6237	48.17	30.37			6.28	2	1			1	191	22.3339	6.53662
CL1710Contig1:163:1527:1:+	len=455 acc=CL1710Contig1:163:1527:1:+ interpro_domain=IPR029069 id=CL1710Contig1:163:1527:1:+ interpro_raw=IPR029069 def=IPR029069:HotDog domain;	80.62	1	1	34	51	33.9336	61.3389	26.2186	60.9389	92.3282	29.52	55.95	32.6	63.88	66.08	8	9	4	9	10	454	51.7329	9.15869
c103913_g7_i1:45:821:3:+	len=259 acc=c103913_g7_i1:45:821:3:+ interpro_domain=IPR016024 id=c103913_g7_i1:45:821:3:+ interpro_raw=IPR011989,IPR016024,IPR000225 go=GO:0005515,GO:0005488 def=IPR016024:Armadillo-type fold;	80.62	1	4	12	14	4.66193		17.7898	99.2919		13.57		34.11	79.84	0	1		3	8		258	28.9468	4.41162
c109408_g1_i1:1:218:3:+	len=72 acc=c109408_g1_i1:1:218:3:+ interpro_raw=IPR000477 interpro_domain=IPR000477 id=c109408_g1_i1:1:218:3:+ def=IPR000477:Reverse transcriptase domain;	80.56	1	1	2	2	8.18998				2.96355	80.56			0	33.33	1				1	72	7.92408	6.56592
c63755_g1_i1:1:324:1:+	len=108 acc=c63755_g1_i1:1:324:1:+ interpro_domain=IPR020683 id=c63755_g1_i1:1:324:1:+ interpro_raw=IPR002110,IPR020683 go=GO:0005515 def=IPR020683:Ankyrin repeat-containing domain;	80.56	1	1	8	9	9.41477	27.2477	4.90383	9.9835		48.15	80.56	37.96	42.59		2	4	1	2		108	11.759	5.30029
c97796_g1_i1:255:473:3:+	len=73 acc=c97796_g1_i1:255:473:3:+ pathways= interpro_raw=IPR001770,IPR015898 go=GO:0007186,GO:0005834,GO:0004871 interpro_family=IPR001770 id=c97796_g1_i1:255:473:3:+ interpro_domain=IPR015898 def=IPR001770:G-protein, gamma subunit; IPR015898:G-protein gamma-like domain;	80.56	1	2	2	4	5.70034	7.98997				80.56	80.56		0		1	2				72	8.30709	7.18115
CL946Contig1:571:1575:1:+	len=335 acc=CL946Contig1:571:1575:1:+ id=CL946Contig1:571:1575:1:+ interpro_domain=IPR003347,IPR027452 interpro_raw=IPR003347,IPR027452,IPR027445 interpro_family=IPR027445 def=IPR003347:JmjC domain; IPR027445:Hypoxia-inducible factor 1-alpha inhibitor; IPR027452:Hypoxia-inducible factor 1-alpha inhibitor, domain II;	80.54	2	6	12	12	17.902	10.8942	2.65302	6.84746	2.88561	46.41	26.65	12.57	13.47	26.05	6	2	1	1	2	334	39.161	8.44092
c100343_g1_i7:1:1483:2:+	len=494 acc=c100343_g1_i7:1:1483:2:+ interpro_domain=IPR020846 id=c100343_g1_i7:1:1483:2:+ interpro_raw=IPR001958,IPR011701,IPR020846 interpro_family=IPR011701 go=GO:0055085,GO:0005215,GO:0016021 def=IPR011701:Major facilitator superfamily; IPR020846:Major facilitator superfamily domain;	80.53	2	17	46	60	53.6137	50.7297	77.6921	17.9047	69.847	47.46	35.09	53.96	22.72	59.23	13	7	15	3	11	493	54.0031	7.60596
c105320_g1_i2:3656:4227:2:+	len=190	80.53	1	40	108	139	103.879	174.535	108.331	101.281	180.848	72.63	80.53	75.79	76.32	76.84	17	32	22	21	32	190	18.369	4.00537
c102491_g1_i3:1:466:3:+	len=154 acc=c102491_g1_i3:1:466:3:+ interpro_raw=IPR003598,IPR007110,IPR003599,IPR013783 go=GO:0005515 interpro_domain=IPR013783 id=c102491_g1_i3:1:466:3:+ def=IPR013783:Immunoglobulin-like fold;	80.52	1	1	7	8	7.79925	10.149	6.0799	4.56711		35.71	43.51	24.68	64.94		1	2	1	3		154	17.1218	8.74854
c112763_g1_i1:1:235:3:+	len=77 acc=c112763_g1_i1:1:235:3:+ interpro_raw=IPR016162,IPR015590,IPR016161 go=GO:0055114,GO:0008152,GO:0016491 interpro_domain=IPR016161 id=c112763_g1_i1:1:235:3:+ ec=1.-.-.- def=IPR016161:Aldehyde/histidinol dehydrogenase;	80.52	1	1	3	6	15.2605	7.98568		9.23687		80.52	80.52		58.44		2	1		2		77	7.92397	4.71631
c101159_g1_i2:109:942:1:+	len=278 acc=c101159_g1_i2:109:942:1:+ id=c101159_g1_i2:109:942:1:+ go=GO:0016020 interpro_family=IPR001107 interpro_raw=IPR001107,IPR000163 def=IPR001107:Band 7 protein;	80.51	1	8	12	13	33.6013	25.6468			29.4761	43.68	66.43	0		43.68	5	4			3	277	30.4043	6.58057
c105223_g3_i3:1:495:3:+	len=164	80.49	1	5	28	44	44.4319	28.4935	68.1104	124.9	11.7459	73.17	67.07	80.49	70.73	71.34	5	6	9	9	3	164	16.743	7.56201
c102471_g2_i4:1:247:1:+	len=82 acc=c102471_g2_i4:1:247:1:+ id=c102471_g2_i4:1:247:1:+ interpro_domain=IPR020683 go=GO:0005515 interpro_raw=IPR002110,IPR020683 def=IPR020683:Ankyrin repeat-containing domain;	80.49	1	2	4	6		11.0022	3.22347	4.71802			71.95	73.17	70.73			2	1	1		82	9.62491	6.02393
c103651_g3_i8:318:950:3:+	len=211 acc=c103651_g3_i8:318:950:3:+ id=c103651_g3_i8:318:950:3:+ ec=2.3.-.- interpro_raw=IPR000542 go=GO:0016746 interpro_family=IPR000542 def=IPR000542:Acyltransferase ChoActase/COT/CPT;	80.48	3	1	3	3		4.47123			6.35729		31.9	0	0	22.38		1			1	210	23.7667	7.48877
c101569_g2_i2:1:1923:1:+	len=641 acc=c101569_g2_i2:1:1923:1:+ interpro_domain=IPR001606 id=c101569_g2_i2:1:1923:1:+ go=GO:0003677 interpro_raw=IPR001606 def=IPR001606:ARID DNA-binding domain;	80.47	2	1	98	127	88.7327	92.0862	139.518	370.575	32.6308	64.84	70.94	58.13	59.69	25.78	14	29	23	34	5	640	67.3006	8.79248
c74360_g2_i1:32:555:2:+	len=174 acc=c74360_g2_i1:32:555:2:+ interpro_domain=IPR027409,IPR027410 id=c74360_g2_i1:32:555:2:+ interpro_raw=IPR002423,IPR027410,IPR027409 interpro_family=IPR002423 go=GO:0005524 def=IPR002423:Chaperonin Cpn60/TCP-1 family; IPR027409:GroEL-like apical domain; IPR027410:TCP-1-like chaperonin intermediate domain;	80.46	1	1	14	18	15.8627	18.993	3.40061	28.0905	28.9396	54.6	69.54	14.37	50	56.9	4	4	1	2	4	174	19.3039	6.53662
CL3753Contig1:120:935:3:+	len=272 acc=CL3753Contig1:120:935:3:+ interpro_raw=IPR000425,IPR023271 interpro_family=IPR000425 go=GO:0016020,GO:0006810,GO:0005215 interpro_domain=IPR023271 id=CL3753Contig1:120:935:3:+ def=IPR000425:Major intrinsic protein; IPR023271:Aquaporin-like;	80.44	1	2	13	14	18.5178	13.6635	3.37389	6.41266	25.0018	41.33	32.84	17.71	38.38	40.59	4	1	2	3	3	271	28.534	7.43018
c94098_g1_i1:271:549:1:+	len=93	80.43	1	1	3	3	5.46773		2.40365		4.43208	60.87		13.04		64.13	1		1		1	92	10.7795	8.17725
c108067_g1_i1:1:310:3:+	len=102	80.39	1	2	17	17	3.41139	14.4106	22.6449	12.309	14.4551	28.43	43.14	75.49	44.12	76.47	1	4	5	2	5	102	10.9274	9.99365
CL6923Contig1:2799:2969:1:-	len=57	80.36	1	1	3	3	5.21123	3.99869			4.17784	62.5	66.07			51.79	1	1			1	56	6.25641	8.6167
c97436_g5_i1:1:338:2:+	len=112 acc=c97436_g5_i1:1:338:2:+ id=c97436_g5_i1:1:338:2:+ go=GO:0003735,GO:0005840,GO:0006412 interpro_family=IPR000851 interpro_raw=IPR014721,IPR020568,IPR000851,IPR005324 def=IPR000851:Ribosomal protein S5;	80.36	1	3	6	6	11.1445	1.31268		20.4778	5.83691	71.43	10.71	0	77.68	41.96	2	1		2	1	112	11.4844	10.4478
	>sp|K1C15_SHEEP|	80.35	1	14	37	42	44.7187	45.7624	47.5675	19.4912	15.8891	54.97	59.6	33.33	33.11	28.04	11	11	11	5	3	453	48.7401	4.79248
c101748_g1_i1:2228:2749:2:+	len=174 acc=c101748_g1_i1:2228:2749:2:+ go=GO:0000166,GO:0003676 interpro_raw=IPR012677,IPR000504 interpro_domain=IPR012677 id=c101748_g1_i1:2228:2749:2:+ def=IPR012677:Nucleotide-binding alpha-beta plait domain;	80.35	2	3	15	25	47.5918	38.1753	23.3213	33.2967	57.74	58.38	51.45	67.05	47.98	57.23	4	4	3	3	4	173	19.8993	11.854
c99907_g1_i2:270:1799:3:+	len=510 acc=c99907_g1_i2:270:1799:3:+ id=c99907_g1_i2:270:1799:3:+ interpro_domain=IPR020846 interpro_raw=IPR011701,IPR020846,IPR001958 go=GO:0016021,GO:0005215,GO:0055085 interpro_family=IPR011701 def=IPR011701:Major facilitator superfamily; IPR020846:Major facilitator superfamily domain;	80.35	1	1	49	63	128.556	97.5999	38.1381	67.6114	38.9488	58.15	60.71	41.45	54.42	58.15	19	11	5	11	8	509	54.4906	8.25049
c89719_g1_i1:1:553:2:+	len=184 acc=c89719_g1_i1:1:553:2:+ interpro_raw=IPR007023 go=GO:0005634,GO:0042254 interpro_family=IPR007023 id=c89719_g1_i1:1:553:2:+ def=IPR007023:Ribosomal biogenesis regulatory protein;	80.33	1	1	5	5	9.52091			7.71049	6.9165	59.02	0	0	37.16	27.87	2			2	1	183	21.0052	9.92041
c101246_g4_i1:78:1208:3:+	len=377 acc=c101246_g4_i1:78:1208:3:+ id=c101246_g4_i1:78:1208:3:+ interpro_raw=IPR004001,IPR004000,IPR020902 interpro_family=IPR004000 def=IPR004000:Actin family;	80.32	1	7	39	113	32.1095	121.038	164.766	137.657	18.4179	31.38	63.56	63.83	27.93	14.1	6	14	21	14	3	376	41.7589	5.47803
c95190_g1_i2:1:566:1:+	len=188 acc=c95190_g1_i2:1:566:1:+ = interpro_raw=IPR008160 id=c95190_g1_i2:1:566:1:+ def=IPR008160:Collagen triple helix repeat;	80.32	2	66	89	110	35.3795	132.185	108.386	102.925	175.352	67.55	68.62	64.36	63.3	63.3	9	21	25	18	27	188	18.3972	9.05615
c98333_g1_i2:1:948:1:+	len=316 acc=c98333_g1_i2:1:948:1:+ interpro_raw=IPR007854 interpro_domain=IPR007854 id=c98333_g1_i2:1:948:1:+ def=IPR007854:Pre-mRNA polyadenylation factor Fip1;	80.32	1	1	37	47	67.466	60.2219	70.1749	22.2574	73.7931	47.3	29.84	57.14	43.49	45.08	10	6	11	3	10	315	34.9895	4.4751
c101111_g1_i2:1:780:1:+	len=260	80.31	1	9	20	21	24.0053	27.2359	14.8095	23.741	21.2897	38.22	31.27	45.95	59.46	33.59	4	4	5	4	3	259	29.0242	4.81787
c98486_g1_i2:1:782:3:+	len=260 acc=c98486_g1_i2:1:782:3:+ interpro_raw=IPR009003,IPR001254 go=GO:0004252,GO:0006508 id=c98486_g1_i2:1:782:3:+ interpro_domain=IPR009003 ec=3.4.21.- def=IPR009003:Trypsin-like cysteine/serine peptidase domain;	80.31	1	1	13	14	8.83325	30.3466	19.3036		4.19182	35.52	66.02	78.38		18.53	2	5	5		1	259	27.9849	4.41162
c109795_g1_i1:146:346:2:+	len=67	80.3	1	1	2	2		3.60466	6.71745				80.3	63.64				1	1			66	7.48367	9.29053
c70034_g2_i1:1:202:3:+	len=66 acc=c70034_g2_i1:1:202:3:+ interpro_family=IPR001971 go=GO:0006412,GO:0003735,GO:0005840 interpro_raw=IPR001971 id=c70034_g2_i1:1:202:3:+ def=IPR001971:Ribosomal protein S11;	80.3	1	1	4	4		3.81387	7.00728	7.62838			42.42	77.27	75.76	0		1	1	2		66	6.87151	9.31982
c102129_g1_i1:101:1822:2:+	len=574 acc=c102129_g1_i1:101:1822:2:+ go=GO:0000049,GO:0004812,GO:0000166,GO:0004826,GO:0043039,GO:0006432,GO:0005524,GO:0006418,GO:0005737 interpro_family=IPR004529 interpro_raw=IPR011991,IPR006195,IPR004529,IPR002319 pathways=KEGG:ec00970+6.1.1.20 ec=6.1.1.-,6.1.1.20 id=c102129_g1_i1:101:1822:2:+ interpro_domain=IPR011991 def=IPR004529:Phenylalanyl-tRNA synthetase, class IIc, alpha subunit; IP…	80.28	1	14	26	33	24.222	20.0368	19.922	33.0865	20.3193	30.72	28.27	12.04	42.41	33.68	5	7	4	6	5	573	64.6071	6.0874
c103342_g4_i1:1:1309:1:+	len=436 acc=c103342_g4_i1:1:1309:1:+ interpro_raw=IPR000477,IPR003286 interpro_family=IPR003286 go=GO:0006278,GO:0003964,GO:0003723 id=c103342_g4_i1:1:1309:1:+ ec=2.7.7.49 def=IPR003286:RNA-directed DNA polymerase, eukaryota;	80.28	1	5	22	25	42.9301	15.9846	11.7154	30.505	29.2744	55.05	42.43	10.32	42.89	23.85	8	3	1	5	6	436	48.9397	9.34912
c75324_g2_i1:1:217:3:+	len=71	80.28	1	1	3	3				4.22232	11.504	0	0		64.79	80.28				1	2	71	8.05283	4.75439
c98760_g1_i3:877:2187:1:+	len=437	80.28	2	46	113	152	375.404	186.814	77.8571	148.036	278.838	72.48	70.18	56.65	50	51.38	36	25	12	22	36	436	46.9196	10.2427
c76871_g1_i1:1:444:3:+	len=147 acc=c76871_g1_i1:1:444:3:+ interpro_raw=IPR011527 go=GO:0016021,GO:0005524,GO:0042626,GO:0006810,GO:0055085 id=c76871_g1_i1:1:444:3:+ interpro_domain=IPR011527 def=IPR011527:ABC transporter type 1, transmembrane domain;	80.27	1	1	4	5	11.7015		11.0967			80.27		46.26			3		2			147	16.8295	10.1694
c104775_g1_i1:242:1930:2:+	len=563 acc=c104775_g1_i1:242:1930:2:+ interpro_family=IPR019394 interpro_raw=IPR019394 id=c104775_g1_i1:242:1930:2:+ def=IPR019394:Predicted transmembrane/coiled-coil 2 protein;	80.25	4	7	32	34	27.8374	26.9442	24.5097	22.4882	33.2671	41.64	35.23	29.72	42.17	36.65	7	7	6	7	5	562	62.6926	7.10791
c50113_g1_i1:48:519:3:+	len=157 acc=c50113_g1_i1:48:519:3:+ interpro_raw=IPR004753 interpro_family=IPR004753 go=GO:0000902 id=c50113_g1_i1:48:519:3:+ def=IPR004753:Cell shape determining protein MreB/Mrl;	80.25	1	3	4	5		2.65309			9.81226		24.84	0	0	63.06		2			2	157	16.5857	4.99561
CL3403Contig1:254:757:2:+	len=168 acc=CL3403Contig1:254:757:2:+ id=CL3403Contig1:254:757:2:+ interpro_family=IPR019269 interpro_raw=IPR019269 def=IPR019269:Biogenesis of lysosome-related organelles complex-1, subunit 2;	80.24	1	1	4	4	4.06062		11.2282	2.49313		32.93	0	66.47	10.18		1		2	1		167	19.0995	5.43994
c53577_g1_i1:1:503:2:+	len=167 acc=c53577_g1_i1:1:503:2:+ interpro_raw=IPR002549 interpro_family=IPR002549 id=c53577_g1_i1:1:503:2:+ def=IPR002549:Uncharacterised protein family UPF0118;	80.24	1	4	5	6	3.25044	4.91156	3.23341		12.4405	27.54	26.95	29.34		61.08	1	1	1		3	167	18.0571	7.60596
c92701_g1_i1:71:891:2:+	len=273 acc=c92701_g1_i1:71:891:2:+ id=c92701_g1_i1:71:891:2:+ interpro_raw=IPR013657 go=GO:0055085 interpro_family=IPR013657 def=IPR013657:UAA transporter;	80.22	1	2	9	15	16.4337	24.0438	2.93183	4.26313	2.92843	66.3	44.69	32.97	13.55	20.88	3	4	2	1	1	273	30.4791	9.53955
c94116_g1_i2:1:276:2:+	len=91	80.22	1	2	21	24	68.503	4.53518	13.7883	7.39157	28.1066	78.02	24.18	78.02	50.55	71.43	13	1	3	2	5	91	9.47586	5.8335
CL330Contig2:410:1306:2:+	len=299 acc=CL330Contig2:410:1306:2:+ pathways=KEGG:ec00230+6.3.4.13,MetaCyc:PWY-6277,MetaCyc:PWY-6122,MetaCyc:PWY-6121,UniPathway:UPA00074 interpro_raw=IPR000115,IPR013816,IPR020562,IPR016185,IPR011761,IPR013815,IPR020561 go=GO:0009113,GO:0046872,GO:0003824,GO:0004637,GO:0005524 interpro_family=IPR006284,IPR000115 id=CL330Contig2:410:1306:2:+ ec=6.3.4.13 def=IPR000115:Phosphoribosylglycinamide s…	80.2	1	14	20	26	37.6172	12.4083	23.7207	33.1881	33.7958	37.25	26.85	49.33	45.64	77.85	5	3	6	5	4	298	31.9823	6.1001
CL9543Contig1:1360:1665:1:-	len=102	80.2	1	1	5	6	4.25083	3.87818			18.942	56.44	26.73			80.2	1	1			3	101	11.1416	9.48096
c104318_g4_i10:1:1864:2:+	len=621 acc=c104318_g4_i10:1:1864:2:+ interpro_raw=IPR001478,IPR016313 go=GO:0005515 interpro_family=IPR016313 id=c104318_g4_i10:1:1864:2:+ def=IPR016313:Disks large 1;	80.19	2	1	59	73	95.6851	73.2236	151.169	71.6855	58.3127	60.55	58.45	68.6	49.76	39.13	15	10	20	11	9	621	66.9202	6.02393
c113905_g1_i1:1:318:1:+	len=106 acc=c113905_g1_i1:1:318:1:+ pathways=UniPathway:UPA00378 interpro_raw=IPR027791,IPR029044 id=c113905_g1_i1:1:318:1:+ interpro_domain=IPR027791,IPR029044 def=IPR027791:Galactosyltransferase, C-terminal; IPR029044:Nucleotide-diphospho-sugar transferases;	80.19	1	1	10	14	7.71625	6.26531	17.7197	3.65615	12.4738	30.19	46.23	36.79	72.64	51.89	2	1	3	2	3	106	11.5985	5.8335
c106381_g1_i1:1883:8194:2:+	len=2104 acc=c106381_g1_i1:1883:8194:2:+ go=GO:0005319,GO:0006869 interpro_raw=IPR015818,IPR015817,IPR015255,IPR015819,IPR009454 pathways= id=c106381_g1_i1:1883:8194:2:+ interpro_domain=IPR015819 def=IPR015819:Lipid transport protein, beta-sheet shell;	80.17	1	180	189	343	365.601	316.869	299.7	328.202	201.966	43.41	46.22	42.94	37.61	38.42	57	60	64	59	28	2103	232.825	7.09326
c64625_g1_i1:1:352:3:+	len=116 acc=c64625_g1_i1:1:352:3:+ interpro_raw=IPR017970,IPR020479,IPR009057,IPR001356 go=GO:0003677,GO:0006355,GO:0043565 id=c64625_g1_i1:1:352:3:+ interpro_domain=IPR009057 def=IPR009057:Homeodomain-like;	80.17	1	1	7	9	20.0173	5.42638	10.3386	3.61033	5.83656	72.41	31.03	43.97	37.07	43.97	3	2	1	1	1	116	13.7103	11.4878
c97397_g1_i1:176:919:2:+	len=248 acc=c97397_g1_i1:176:919:2:+ interpro_domain=IPR002939 id=c97397_g1_i1:176:919:2:+ go=GO:0051082,GO:0006457 interpro_raw=IPR002939,IPR008971 def=IPR002939:Chaperone DnaJ, C-terminal;	80.16	1	4	9	10	14.4349	5.97769	6.36351	9.89459	6.15903	49.39	27.94	23.89	36.03	19.03	3	2	1	2	1	247	27.2403	4.93213
c97097_g1_i1:1:518:3:+	len=172 acc=c97097_g1_i1:1:518:3:+ interpro_raw=IPR002068,IPR001436,IPR008978,IPR031107 interpro_family=IPR001436,IPR031107 id=c97097_g1_i1:1:518:3:+ def=IPR001436:Alpha crystallin/Heat shock protein; IPR031107:Small heat shock protein HSP20;	80.12	1	2	5	5	3.61925	3.83115	5.08363	5.6438	6.63791	23.98	39.77	23.39	23.98	24.56	1	1	1	1	1	171	19.8569	8.45557
c101107_g3_i2:189:719:3:+	len=177	80.11	1	1	8	10	11.9441	5.94268	17.9041		22.7428	56.82	30.68	72.73		78.98	2	1	3		4	176	20.3887	8.85107
c104588_g4_i1:80:1665:2:+	len=528 acc=c104588_g4_i1:80:1665:2:+ id=c104588_g4_i1:80:1665:2:+ ec=3.6.1.3 interpro_raw=IPR026983,IPR026980 interpro_family=IPR026983 go=GO:0003777,GO:0005858,GO:0016887,GO:0007018,GO:0001539 def=IPR026983:Dynein heavy chain;	80.11	1	9	23	27	3.00054	31.7899	19.2778	26.6884	50.8921	14.39	43.56	33.33	22.92	38.07	2	8	5	4	6	528	61.7872	5.32568
c91619_g3_i1:1:559:2:+	len=186	80.11	1	2	6	6	5.30556	15.0189	2.90106		5.93642	40.32	63.44	32.26		29.03	1	3	1		1	186	20.5634	4.32275
CL7318Contig1:353:1606:2:+	len=418 acc=CL7318Contig1:353:1606:2:+ interpro_raw=IPR006089,IPR013786,IPR009100,IPR009075,IPR006091 go=GO:0055114,GO:0016627,GO:0003995,GO:0008152,GO:0050660 id=CL7318Contig1:353:1606:2:+ interpro_domain=IPR009075,IPR009100,IPR013786 ec=1.3.99.3 def=IPR009075:Acyl-CoA dehydrogenase/oxidase C-terminal; IPR009100:Acyl-CoA dehydrogenase/oxidase, N-terminal and middle domain; IPR013786:Acyl-CoA deh…	80.1	2	17	56	85	99.2866	100.376	153.749	95.1754	75.2487	60.91	64.99	60.67	45.8	44.84	17	14	15	13	10	417	45.5081	8.22119
c102081_g1_i9:24:1487:3:+	len=488 acc=c102081_g1_i9:24:1487:3:+ go=GO:0005515 interpro_raw=IPR002110,IPR020683 id=c102081_g1_i9:24:1487:3:+ interpro_domain=IPR020683 def=IPR020683:Ankyrin repeat-containing domain;	80.08	6	12	27	30	35.8465	44.8272	19.8448	9.99794	21.1876	48.25	53.39	19.3	21.77	30.8	9	7	5	2	5	487	54.2767	9.45166
c95547_g1_i1:30:1039:3:+	len=336 acc=c95547_g1_i1:30:1039:3:+ id=c95547_g1_i1:30:1039:3:+ interpro_domain=IPR005135 interpro_raw=IPR005135 def=IPR005135:Endonuclease/exonuclease/phosphatase;	80.06	1	1	23	25	38.9173	4.09608	42.8562	42.4485	24.4722	45.54	8.33	61.01	40.77	24.7	8	1	7	6	2	336	37.6635	9.48096
CL31Contig4:329:1111:2:+	len=261 acc=CL31Contig4:329:1111:2:+ id=CL31Contig4:329:1111:2:+ interpro_domain=IPR027806 interpro_raw=IPR027806 def=IPR027806:Harbinger transposase-derived nuclease domain;	80	1	1	9	9		16.3874	7.10579	6.14828	19.1632	0	54.62	24.23	26.54	36.92		4	1	1	3	260	29.6138	9.23193
c102595_g1_i1:207:1049:3:+	len=281 acc=c102595_g1_i1:207:1049:3:+ id=c102595_g1_i1:207:1049:3:+ interpro_domain=IPR011074,IPR001251 interpro_raw=IPR001251,IPR011074 def=IPR001251:CRAL-TRIO domain; IPR011074:CRAL/TRIO, N-terminal domain;	80	1	2	12	16	3.59332	10.246	7.01029	8.70506	34.0259	20.36	47.5	23.57	26.79	40	1	3	2	2	4	280	32.9821	5.60498
c103202_g2_i1:845:1566:2:+	len=240	80	1	1	36	40	50.7705	71.6778	17.9706	13.0189	62.1741	71.67	74.17	42.92	42.08	73.33	9	13	3	3	10	240	25.649	10.6675
c57927_g1_i1:1:228:3:+	len=75 acc=c57927_g1_i1:1:228:3:+ interpro_family=IPR001734 go=GO:0016020,GO:0005215,GO:0006810,GO:0055085 interpro_raw=IPR001734 id=c57927_g1_i1:1:228:3:+ def=IPR001734:Sodium/solute symporter;	80	1	2	7	18	23.7502	16.5258	34.1714	5.7023	23.9151	78.67	60	60	57.33	77.33	4	1	1	1	3	75	7.97129	8.00146
c66848_g2_i1:106:317:1:+	len=70	80	1	3	4	4	10.4551		3.96062	4.74301		72.86		40	57.14		2		1	1		70	7.55785	5.70654
c91808_g3_i1:1:529:3:+	len=175 acc=c91808_g3_i1:1:529:3:+ ec=3.6.1.- interpro_domain=IPR012340,IPR010339 id=c91808_g3_i1:1:529:3:+ interpro_family=IPR027238 go=GO:0043141,GO:0003678,GO:0005524 interpro_raw=IPR012340,IPR027238,IPR010339 def=IPR010339:TIP49, C-terminal; IPR012340:Nucleic acid-binding, OB-fold; IPR027238:RuvB-like;	80	1	2	10	11	23.1159	23.4828	10.3801		4.65299	35.43	77.14	27.43		22.29	2	4	3		1	175	19.4669	5.16064
c97432_g1_i1:1:226:2:+	len=75 acc=c97432_g1_i1:1:226:2:+ interpro_raw=IPR027417 id=c97432_g1_i1:1:226:2:+ interpro_domain=IPR027417 def=IPR027417:P-loop containing nucleoside triphosphate hydrolase;	80	1	2	3	3	3.80373				16.4607	41.33			0	80	1				2	75	8.09124	8.76318
c97710_g1_i4:1:451:1:+	len=150 acc=c97710_g1_i4:1:451:1:+ go=GO:0006508,GO:0004252 interpro_raw=IPR009003,IPR018114,IPR001254 ec=3.4.21.- interpro_domain=IPR009003 id=c97710_g1_i4:1:451:1:+ def=IPR009003:Trypsin-like cysteine/serine peptidase domain;	80	3	2	4	5	3.85521	12.0637		3.63151		23.33	66.67	0	20		1	3		1		150	16.5991	4.58936
c99858_g2_i5:1:227:2:+	len=75 acc=c99858_g2_i5:1:227:2:+ go=GO:0016627,GO:0003995,GO:0055114,GO:0008152 interpro_raw=IPR006091,IPR009100,IPR006089 ec=1.3.99.3 id=c99858_g2_i5:1:227:2:+ interpro_domain=IPR009100 def=IPR009100:Acyl-CoA dehydrogenase/oxidase, N-terminal and middle domain;	80	1	1	5	6	5.30586	3.4122		6.48619		45.33	49.33		53.33		2	1		2		75	8.27515	9.1001
c104187_g1_i1:125:322:2:+	len=66 acc=c104187_g1_i1:125:322:2:+ interpro_raw=IPR028626,IPR000289,IPR012340 go=GO:0006412,GO:0005622,GO:0003735,GO:0005840 interpro_family=IPR000289 id=c104187_g1_i1:125:322:2:+ def=IPR000289:Ribosomal protein S28e; IPR028626:Ribosomal protein S28e conserved site;	80	1	5	5	6			5.03921	15.6377			0	33.85	80				1	4		65	7.38109	10.3745
c59104_g1_i1:1:241:2:+	len=80	80	1	2	6	6		11.1101		8.86012	5.77634		71.25		65	46.25		3		2	1	80	8.35721	11.7222
c91780_g1_i1:1:305:3:+	len=101 acc=c91780_g1_i1:1:305:3:+ ec=3.4.23.- interpro_domain=IPR021109 id=c91780_g1_i1:1:305:3:+ interpro_family=IPR001461 go=GO:0004190,GO:0006508 interpro_raw=IPR001461,IPR021109 def=IPR001461:Aspartic peptidase; IPR021109:Aspartic peptidase domain;	80	2	1	3	4		3.7369		18.2662	12.1426		23		80	76		1		2	1	100	11.2009	7.94287
c104593_g1_i4:1789:1941:1:+	len=51	80	1	1	1	1				4.36271					80					1		50	5.73	10.8726
c94187_g3_i1:1:287:2:+	len=95 acc=c94187_g3_i1:1:287:2:+ go=GO:0003677 interpro_raw=IPR009057,IPR006600 interpro_domain=IPR009057 id=c94187_g3_i1:1:287:2:+ def=IPR009057:Homeodomain-like;	80	1	1	2	3				16.146	12.8393				78.95	80				1	1	95	11.214	10.4624
c105060_g2_i5:120:1302:3:+	len=394 acc=c105060_g2_i5:120:1302:3:+ interpro_domain=IPR030402 id=c105060_g2_i5:120:1302:3:+ interpro_family=IPR001902 go=GO:0055085,GO:0008272,GO:0016021,GO:0015116,GO:0016020,GO:0008271 interpro_raw=IPR001902,IPR011547,IPR030402 pathways= def=IPR001902:Sulphate anion transporter; IPR030402:Sulfate transporter N-terminal domain with GLY motif;	79.95	1	12	80	107	166.017	146.67	54.735	130.552	213.044	69.04	40.1	53.05	60.66	64.97	26	15	10	15	21	394	43.5676	8.32373
c102346_g1_i2:97:1011:1:+	len=305 acc=c102346_g1_i2:97:1011:1:+ interpro_raw=IPR023395,IPR018108 = interpro_domain=IPR023395 id=c102346_g1_i2:97:1011:1:+ def=IPR023395:Mitochondrial carrier domain;	79.93	3	6	21	28	13.8309	14.8617	40.1591	17.3493	39.9358	45.39	31.58	33.88	50	44.74	3	3	9	4	4	304	33.8303	9.42236
c96264_g2_i1:149:1675:2:+	len=509 acc=c96264_g2_i1:149:1675:2:+ interpro_raw=IPR013822,IPR003593,IPR000897,IPR004125,IPR006325,IPR027417,IPR022941 go=GO:0048500,GO:0005525,GO:0003924,GO:0008312,GO:0006614 interpro_family=IPR006325,IPR022941 pathways= id=c96264_g2_i1:149:1675:2:+ interpro_domain=IPR027417 def=IPR006325:Signal recognition particle, SRP54 subunit, eukaryotic; IPR022941:Signal recognition particle, SRP54 subu…	79.92	1	15	32	54	64.3602	50.8754	47.9778	28.6897	25.7349	35.63	52.76	40.35	23.82	40.16	8	10	10	6	5	508	55.7216	8.67529
CL1438Contig1:5068:5814:1:-	len=249 acc=CL1438Contig1:5068:5814:1:- id=CL1438Contig1:5068:5814:1:- interpro_raw=IPR017986,IPR019775,IPR001680,IPR020472,IPR015943 go=GO:0005515 interpro_family=IPR016453 def=IPR016453:Coatomer beta' subunit (COPB2); IPR019775:WD40 repeat, conserved site;	79.84	1	1	8	12	12.4854	30.9804	8.57907	12.8235	3.97354	43.55	46.37	25	35.08	26.21	2	3	2	2	1	248	27.1385	6.78564
CL4139Contig1:240:2489:3:+	len=750 acc=CL4139Contig1:240:2489:3:+ interpro_raw=IPR005617,IPR017986,IPR019775,IPR009146,IPR001680,IPR015943 go=GO:0005634,GO:0006355,GO:0005515 interpro_family=IPR009146 id=CL4139Contig1:240:2489:3:+ interpro_domain=IPR005617,IPR015943 def=IPR005617:Groucho/TLE, N-terminal Q-rich domain; IPR009146:Groucho/transducin-like enhancer; IPR015943:WD40/YVTN repeat-like-containing domain;	79.84	1	232	269	377	572.483	508.421	466.089	256.673	513.831	49.4	55.54	52.2	53	48.6	80	74	66	48	61	749	80.5063	7.1958
c103363_g1_i2:1:1536:1:+	len=512 acc=c103363_g1_i2:1:1536:1:+ pathways= go=GO:0016020,GO:0016021,GO:0022891,GO:0022857,GO:0055085,GO:0005215 interpro_family=IPR005828 interpro_raw=IPR020846,IPR003663,IPR005828,IPR005829 id=c103363_g1_i2:1:1536:1:+ interpro_domain=IPR020846 def=IPR005828:General substrate transporter; IPR020846:Major facilitator superfamily domain;	79.84	2	32	72	104	144.531	110.174	106.9	100.982	279.997	41.29	64.97	55.97	47.16	60.47	15	15	15	12	25	511	55.3913	8.93896
c100429_g1_i1:105:1520:3:+	len=472 acc=c100429_g1_i1:105:1520:3:+ interpro_raw=IPR003663,IPR005828,IPR020846,IPR005829 go=GO:0016021,GO:0005215,GO:0022891,GO:0022857,GO:0055085,GO:0016020 interpro_family=IPR005828 pathways= id=c100429_g1_i1:105:1520:3:+ interpro_domain=IPR020846 def=IPR005828:General substrate transporter; IPR020846:Major facilitator superfamily domain;	79.83	1	10	36	45	50.2416	49.1295	62.5902	14.094	89.9722	55.2	46.92	40.98	19.96	58.81	10	9	7	2	10	471	50.6127	8.26514
c96579_g2_i1:1:1089:1:+	len=363 acc=c96579_g2_i1:1:1089:1:+ interpro_raw=IPR002731 id=c96579_g2_i1:1:1089:1:+ interpro_domain=IPR002731 def=IPR002731:ATPase, BadF/BadG/BcrA/BcrD type;	79.83	2	7	11	14	2.79222	20.6273	10.1886			32.32	48.9	49.72	0	0	2	6	4			362	39.5106	7.40088
c97427_g1_i2:86:802:2:+	len=239	79.83	3	7	20	26	21.4809	36.7212	6.15451	6.68336	14.1158	64.71	51.26	18.07	23.95	23.95	6	10	1	2	3	238	25.9037	4.48779
c105116_g2_i2:394:1941:1:+	len=516	79.81	1	2	94	141	87.8882	73.2991	88.8596	258.176	37.1831	54.37	77.67	79.42	79.22	43.5	17	23	23	30	8	515	54.9096	5.8335
c68914_g1_i1:104:415:2:+	len=104 acc=c68914_g1_i1:104:415:2:+ id=c68914_g1_i1:104:415:2:+ interpro_raw=IPR001734 go=GO:0055085,GO:0006810,GO:0005215,GO:0016020 interpro_family=IPR001734 def=IPR001734:Sodium/solute symporter;	79.81	1	1	4	6	3.68108	7.6467	2.82425			39.42	65.38	50	0	0	1	3	1			104	11.4136	5.78271
c97436_g3_i1:1429:1743:1:+	len=105 acc=c97436_g3_i1:1429:1743:1:+ id=c97436_g3_i1:1429:1743:1:+ go=GO:0005840,GO:0003735,GO:0005622,GO:0006412 interpro_family=IPR003256 interpro_raw=IPR005825,IPR008991,IPR003256,IPR005824,IPR014722 def=IPR003256:Ribosomal protein L24;	79.81	1	1	4	4		3.53814	3.56022		3.63502	0	26.92	30.77	0	54.81		1	1		2	104	11.4233	10.1841
c99562_g2_i2:242:1195:2:+	len=318 acc=c99562_g2_i2:242:1195:2:+ interpro_domain=IPR023395 id=c99562_g2_i2:242:1195:2:+ interpro_raw=IPR023395,IPR018108 = def=IPR023395:Mitochondrial carrier domain;	79.81	1	1	11	11	14.2557	9.08879	2.86793	3.45973	22.5929	34.7	30.91	4.42	10.73	53.31	3	3	1	1	3	317	35.1659	9.43701
CL2307Contig1:1443:2633:3:+	len=397 acc=CL2307Contig1:1443:2633:3:+ id=CL2307Contig1:1443:2633:3:+ ec=2.7.1.6 pathways=MetaCyc:PWY-3821,MetaCyc:PWY-6317,MetaCyc:PWY-6527,KEGG:ec00052+2.7.1.6,KEGG:ec00520+2.7.1.6,UniPathway:UPA00214 interpro_raw=IPR000705,IPR006206,IPR013750,IPR014721,IPR019539,IPR019741,IPR006203,IPR020568,IPR006204 interpro_family=IPR006206 go=GO:0005737,GO:0005524,GO:0004335,GO:0016301,GO:0006012,GO:00468…	79.8	2	14	37	45	44.8733	45.8212	56.8864	24.2912	36.8162	61.62	33.33	51.26	34.6	40.66	11	7	10	6	5	396	43.0681	7.92822
CL4640Contig1:372:2096:3:+	len=575 acc=CL4640Contig1:372:2096:3:+ id=CL4640Contig1:372:2096:3:+ ec=2.7.1.30 interpro_raw=IPR018485,IPR018483,IPR005999,IPR018484,IPR000577 interpro_family=IPR000577 go=GO:0005975,GO:0006072,GO:0004370,GO:0016773 pathways=KEGG:ec00561+2.7.1.30,UniPathway:UPA00618,MetaCyc:PWY-4261 def=IPR000577:Carbohydrate kinase, FGGY;	79.79	3	1	36	44	69.4777	35.9757	15.0007	27.1427	70.2399	47.56	23.69	21.95	41.64	51.05	11	7	4	6	10	574	63.6081	5.98584
c102087_g1_i3:1:1132:2:+	len=377 acc=c102087_g1_i3:1:1132:2:+ interpro_family=IPR011701 go=GO:0016021,GO:0055085 interpro_raw=IPR011701,IPR020846 interpro_domain=IPR020846 id=c102087_g1_i3:1:1132:2:+ def=IPR011701:Major facilitator superfamily; IPR020846:Major facilitator superfamily domain;	79.79	1	53	74	97	132.234	173.962	54.5759	27.0077	58.7301	61.44	53.99	32.18	48.94	47.34	24	28	11	7	12	376	40.9451	6.93213
c102312_g3_i4:1:1455:1:+	len=485 acc=c102312_g3_i4:1:1455:1:+ interpro_raw=IPR019819,IPR002018,IPR029058 id=c102312_g3_i4:1:1455:1:+ interpro_domain=IPR029058 def=IPR029058:Alpha/Beta hydrolase fold;	79.79	1	13	23	27	22.5142	51.0247	19.1871	6.00728	28.3246	42.27	51.55	31.13	12.37	44.95	4	8	2	2	8	485	54.1468	7.28369
c28776_g1_i1:1:287:3:+	len=95 acc=c28776_g1_i1:1:287:3:+ id=c28776_g1_i1:1:287:3:+ interpro_family=IPR011768,IPR001884 go=GO:0045901,GO:0003723,GO:0045905,GO:0003746,GO:0043022,GO:0006452 interpro_raw=IPR020189,IPR008991,IPR001884,IPR014722,IPR012340 def=IPR001884:Translation elongation factor IF5A; IPR011768:Translation elongation factor P;	79.79	1	1	4	4		8.37858	3.58667		3.46384	0	79.79	41.49		36.17		2	1		1	94	10.8792	5.07178
c103366_g1_i1:377:646:2:+	len=90 acc=c103366_g1_i1:377:646:2:+ id=c103366_g1_i1:377:646:2:+ interpro_raw=IPR029383 interpro_family=IPR029383 def=IPR029383:ADP-ribosylation factor-like protein 6-interacting protein 6;	79.78	1	1	3	4		5.52363			3.5441	0	43.82			40.45		2			1	89	10.4512	9.34912
c105571_g2_i1:196:465:1:+	len=90 acc=c105571_g2_i1:196:465:1:+ id=c105571_g2_i1:196:465:1:+ interpro_domain=IPR009072 go=GO:0006352,GO:0046982,GO:0005634 interpro_raw=IPR004823,IPR009072 def=IPR009072:Histone-fold;	79.78	1	3	3	3	11.4097					79.78				0	3					89	9.95716	6.30322
c75848_g2_i1:1:270:3:+	len=89 acc=c75848_g2_i1:1:270:3:+ id=c75848_g2_i1:1:270:3:+ interpro_domain=IPR017853,IPR013781 ec=3.2.1.- interpro_raw=IPR013781,IPR015883,IPR017853 go=GO:0004553,GO:0005975 pathways=KEGG:ec00520+3.2.1.52,KEGG:ec00511+3.2.1.52,KEGG:ec00603+3.2.1.52,KEGG:ec00513+3.2.1.52,MetaCyc:PWY-6902,KEGG:ec00531+3.2.1.52,KEGG:ec00604+3.2.1.52 def=IPR013781:Glycoside hydrolase, catalytic domain; IPR017853:Gly…	79.78	1	1	5	6	4.40883	8.33241				55.06	58.43			0	2	3				89	9.74758	4.81787
CL5438Contig1:835:2127:1:+	len=431 acc=CL5438Contig1:835:2127:1:+ interpro_raw=IPR012677,IPR000504 go=GO:0000166,GO:0003676 id=CL5438Contig1:835:2127:1:+ interpro_domain=IPR012677 def=IPR012677:Nucleotide-binding alpha-beta plait domain;	79.77	1	3	7	8	8.80175	9.66131			16.9747	18.37	25.35	0	0	38.37	1	2			4	430	49.9549	5.12256
c106389_g2_i1:905:10840:2:+	len=3312 acc=c106389_g2_i1:905:10840:2:+ id=c106389_g2_i1:905:10840:2:+ interpro_raw=IPR003598,IPR013783,IPR013098,IPR003599,IPR007110 interpro_family=IPR020777 go=GO:0005515 def=IPR020777:Tyrosine-protein kinase, neurotrophic receptor;	79.76	1	97	160	192	231.399	262.653	231.877	145.566	107.466	40.8	47.12	39.35	25.46	29.87	40	44	38	25	24	3311	365.884	4.56396
c105223_g3_i4:1:477:3:+	len=158	79.75	1	6	20	40	39.0876	10.8028	68.22	162.776	6.21797	74.68	42.41	79.75	70.25	45.57	6	2	12	8	1	158	16.0747	6.93213
c97570_g1_i1:113:841:2:+	len=243 acc=c97570_g1_i1:113:841:2:+ pathways= interpro_family=IPR001353 go=GO:0051603,GO:0004175,GO:0005839,GO:0019773,GO:0004298,GO:0006511 interpro_raw=IPR000426,IPR023332,IPR029055,IPR001353 ec=3.4.25.- interpro_domain=IPR029055,IPR000426 id=c97570_g1_i1:113:841:2:+ def=IPR000426:Proteasome alpha-subunit, N-terminal domain; IPR001353:Proteasome, subunit alpha/beta; IPR029055:Nucleophile amino…	79.75	1	1	9	9	15.0965	19.2194	11.0319	3.59277	1.93155	27.27	67.36	27.69	15.29	8.68	2	3	2	1	1	242	26.566	4.89404
c103635_g1_i5:132:1302:3:+	len=390 acc=c103635_g1_i5:132:1302:3:+ interpro_raw=IPR022159,IPR000467 go=GO:0003676 interpro_domain=IPR000467,IPR022159 id=c103635_g1_i5:132:1302:3:+ def=IPR000467:G-patch domain; IPR022159:Tuftelin interacting protein, N-terminal domain;	79.74	3	1	35	38	59.8137	29.1246	39.9632	37.2833	66.5234	50.77	44.62	52.05	57.95	54.1	9	6	6	7	9	390	43.662	6.82959
c104141_g4_i1:68:484:2:+	len=139 acc=c104141_g4_i1:68:484:2:+ interpro_family=IPR002691 go=GO:0003712,GO:0005634,GO:0030274 interpro_raw=IPR002691 id=c104141_g4_i1:68:484:2:+ def=IPR002691:LIM-domain binding protein;	79.71	1	3	6	6	8.61653		6.19351	1.35558	4.39464	34.06	0	28.99	42.75	26.09	1		2	2	1	138	14.5659	6.94678
CL2337Contig1:921:1913:3:+	len=331 acc=CL2337Contig1:921:1913:3:+ id=CL2337Contig1:921:1913:3:+ interpro_domain=IPR016040,IPR016102 pathways=KEGG:ec00720+6.2.1.5,KEGG:ec00640+6.2.1.5,UniPathway:UPA00223,MetaCyc:PWY-5538,MetaCyc:PWY-5690,MetaCyc:PWY-5913,MetaCyc:PWY-7384,MetaCyc:PWY-6728,KEGG:ec00660+6.2.1.5,MetaCyc:PWY-5392,KEGG:ec00020+6.2.1.5,MetaCyc:PWY-6969,MetaCyc:PWY-5537 go=GO:0048037,GO:0003824,GO:0008152 interpro_…	79.7	2	36	110	144	220.358	277.004	194.291	105.114	173.387	63.64	55.45	56.36	65.76	63.03	32	31	23	17	20	330	34.7182	8.86572
c91211_g2_i1:1:196:2:+	len=65	79.69	1	1	3	3	4.57842			1.30875		79.69	0		20.31		2			1		64	7.62607	10.0083
c106190_g1_i1:27:1550:3:+	len=508 acc=c106190_g1_i1:27:1550:3:+ interpro_domain=IPR017853,IPR013781,IPR029070 id=c106190_g1_i1:27:1550:3:+ ec=3.2.1.14 interpro_raw=IPR017853,IPR029070,IPR001223,IPR011583,IPR013781 go=GO:0005975,GO:0004553,GO:0006032,GO:0004568 def=IPR013781:Glycoside hydrolase, catalytic domain; IPR017853:Glycoside hydrolase superfamily; IPR029070:Chitinase insertion domain;	79.68	1	24	31	36	13.5128	31.9767	23.489	18.0716	3.89356	28.01	66.27	33.14	42.21	19.53	6	10	7	8	2	507	56.2428	4.66553
CL1083Contig1:146:886:2:+	len=247 acc=CL1083Contig1:146:886:2:+ id=CL1083Contig1:146:886:2:+ interpro_raw=IPR019376 interpro_family=IPR019376 def=IPR019376:Myeloid leukemia factor;	79.67	2	2	15	17	8.372	11.0802	27.7368	7.84698	5.93224	19.51	57.32	52.85	21.14	10.16	2	4	5	2	2	246	26.9957	7.32764
c103852_g2_i1:1:370:2:+	len=123 acc=c103852_g2_i1:1:370:2:+ id=c103852_g2_i1:1:370:2:+ interpro_domain=IPR015424 go=GO:0003824,GO:0009058,GO:0030170 interpro_raw=IPR004839,IPR015421,IPR015424 def=IPR015424:Pyridoxal phosphate-dependent transferase;	79.67	1	1	4	4	2.71084	11.8474	2.60051			24.39	61.79	27.64			1	2	1			123	13.8149	5.18604
c95729_g2_i1:1:374:3:+	len=124 acc=c95729_g2_i1:1:374:3:+ id=c95729_g2_i1:1:374:3:+ interpro_family=IPR002293 go=GO:0016020,GO:0015171,GO:0003333 interpro_raw=IPR002293 def=IPR002293:Amino acid/polyamine transporter I;	79.67	1	1	5	6	14.611			2.60124	5.78551	79.67	0		17.07	33.33	3			1	1	123	13.8442	9.31982
CL210Contig1:1565:3499:2:+	len=645 acc=CL210Contig1:1565:3499:2:+ pathways=UniPathway:UPA00261,KEGG:ec00250+1.2.1.88,KEGG:ec00330+1.2.1.88,MetaCyc:PWY-6853 interpro_raw=IPR016161,IPR015590,IPR016163,IPR016160,IPR016162,IPR005931 interpro_family=IPR005931 go=GO:0055114,GO:0006561,GO:0016620,GO:0006537,GO:0003842,GO:0016491,GO:0008152 interpro_domain=IPR016161 id=CL210Contig1:1565:3499:2:+ ec=1.5.1.12,1.2.1.- def=IPR005931:D…	79.66	1	70	122	147	207.787	207.763	285.681	91.8223	200.348	51.24	52.95	53.88	46.89	55.28	28	33	35	16	20	644	72.1272	8.90967
	>sp|LEP_HUMAN|	79.64	1	5	8	8	10.5904	15.7888	3.77965		18.3067	44.31	55.69	21.56		37.13	1	3	1		3	167	18.6287	6.3667
c106420_g1_i1:1:1106:2:+	len=368 acc=c106420_g1_i1:1:1106:2:+ interpro_raw=IPR005845,IPR016055,IPR005846,IPR005844,IPR016066 go=GO:0005975,GO:0000287,GO:0016868 pathways=KEGG:ec00520+5.4.2.10,MetaCyc:PWY-6749 id=c106420_g1_i1:1:1106:2:+ interpro_domain=IPR016055 ec=5.4.2.- def=IPR016055:Alpha-D-phosphohexomutase, alpha/beta/alpha I/II/III;	79.62	1	9	17	17	28.936	9.31313		12.6489	5.1825	58.15	44.84	0	28.26	49.73	6	4		3	4	368	41.1573	5.64307
c71937_g2_i1:1:297:2:+	len=98 acc=c71937_g2_i1:1:297:2:+ interpro_raw=IPR009071 id=c71937_g2_i1:1:297:2:+ interpro_domain=IPR009071 def=IPR009071:High mobility group box domain;	79.59	1	2	4	4	3.46656	5.82922		3.32231	2.8352	40.82	54.08		18.37	22.45	1	1		1	1	98	11.4097	9.72998
CL3397Contig1:427:855:1:+	len=143	79.58	1	3	34	56	109.37	62.8246	50.5228	30.6304	67.285	72.54	73.24	76.76	71.13	71.13	15	9	6	6	11	142	15.0628	11.6489
c100376_g3_i3:1:280:1:+	len=93 acc=c100376_g3_i3:1:280:1:+ interpro_raw=IPR002110,IPR020683 go=GO:0005515 id=c100376_g3_i3:1:280:1:+ interpro_domain=IPR020683 def=IPR020683:Ankyrin repeat-containing domain;	79.57	1	2	5	5	5.22496		11.3805	4.51933	10.5354	34.41	0	60.22	23.66	70.97	1		2	1	1	93	10.0424	5.80811
c104025_g3_i4:1:987:3:+	len=328 acc=c104025_g3_i4:1:987:3:+ interpro_raw=IPR003959,IPR027417,IPR003593 go=GO:0005524 id=c104025_g3_i4:1:987:3:+ interpro_domain=IPR027417,IPR003959 def=IPR003959:ATPase, AAA-type, core; IPR027417:P-loop containing nucleoside triphosphate hydrolase;	79.57	3	3	12	15	11.8875	15.5149	26.1079	2.86894	9.24235	18.9	31.1	46.95	4.88	40.85	2	4	4	1	2	328	36.4212	9.0415
c113697_g1_i1:1:282:3:+	len=93	79.57	1	1	3	3	3.87533	7.43906	6.46777			30.11	67.74	79.57			1	1	1			93	10.8436	9.20264
c90998_g3_i1:1:415:3:+	len=137 acc=c90998_g3_i1:1:415:3:+ id=c90998_g3_i1:1:415:3:+ interpro_domain=IPR009695 ec=2.4.1.- interpro_raw=IPR009695 go=GO:0009247,GO:0016758 def=IPR009695:Diacylglycerol glucosyltransferase, N-terminal;	79.56	1	1	11	12	9.55145	4.01876	10.1729	9.37898	23.489	52.55	52.55	49.64	49.64	54.01	2	2	2	2	3	137	15.0538	8.00146
c101786_g1_i3:1497:1763:3:+	len=89	79.55	1	1	4	4	2.76605	4.82911	4.18887	3.65244		15.91	62.5	26.14	29.55		1	1	1	1		88	10.9355	5.80811
c104423_g1_i3:258:656:3:+	len=133 acc=c104423_g1_i3:258:656:3:+ interpro_domain=IPR024518 id=c104423_g1_i3:258:656:3:+ interpro_raw=IPR024518,IPR006616 = def=IPR024518:Domain of unknown function DUF3421;	79.55	1	2	8	10	18.7757		4.33479	5.65421	25.9085	50	0	30.3	37.12	71.21	2		1	1	4	132	14.5326	9.14404
c99471_g1_i1:1:1456:2:+	len=485 acc=c99471_g1_i1:1:1456:2:+ go=GO:0005515 interpro_family=IPR007583 interpro_raw=IPR024958,IPR007583,IPR001478 id=c99471_g1_i1:1:1456:2:+ interpro_domain=IPR001478 def=IPR001478:PDZ domain; IPR007583:GRASP55/65;	79.55	1	55	85	106	93.9216	119.648	98.6681	59.8405	100.41	58.26	55.99	52.89	42.98	60.95	21	24	20	11	19	484	51.2064	4.93213
c113533_g1_i1:1:383:3:+	len=127 acc=c113533_g1_i1:1:383:3:+ go=GO:0004018,GO:0006188,GO:0003824 interpro_family=IPR000362 interpro_raw=IPR013539,IPR000362,IPR008948,IPR022761,IPR020557 pathways=MetaCyc:PWY-6123,UniPathway:UPA00075,MetaCyc:PWY-7219,KEGG:ec00230+4.3.2.2,MetaCyc:PWY-6124,UniPathway:UPA00074,KEGG:ec00250+4.3.2.2,MetaCyc:PWY-7234 ec=4.3.2.2 id=c113533_g1_i1:1:383:3:+ interpro_domain=IPR008948 def=IPR000362:F…	79.53	1	1	6	6		11.031		2.93439	23.3354		58.27	0	48.03	79.53		2		1	3	127	14.1866	8.77783
CL8137Contig1:1:851:3:+	len=283 acc=CL8137Contig1:1:851:3:+ id=CL8137Contig1:1:851:3:+ ec=1.14.-.- pathways= interpro_raw=IPR001128 go=GO:0055114,GO:0005506,GO:0020037,GO:0016705 interpro_family=IPR001128 def=IPR001128:Cytochrome P450;	79.51	1	2	8	9	4.25226	12.5547	4.04352		9.71128	15.55	56.54	22.61	0	44.52	1	4	2		2	283	33.158	8.93896
c101643_g1_i1:94:1692:1:+	len=533 acc=c101643_g1_i1:94:1692:1:+ interpro_family=IPR011701 go=GO:0055085,GO:0016021 interpro_raw=IPR020846,IPR011701 interpro_domain=IPR020846 id=c101643_g1_i1:94:1692:1:+ def=IPR011701:Major facilitator superfamily; IPR020846:Major facilitator superfamily domain;	79.51	2	2	36	43	41.3002	45.7927	39.7051	33.3123	64.832	46.99	52.07	43.23	40.23	47.18	10	8	6	6	10	532	59.3042	7.43018
c104601_g1_i3:88:939:1:+	len=284 acc=c104601_g1_i3:88:939:1:+ id=c104601_g1_i3:88:939:1:+ interpro_domain=IPR029045 go=GO:0008152,GO:0003824 interpro_family=IPR001753 interpro_raw=IPR029045,IPR001753 def=IPR001753:Crotonase superfamily; IPR029045:ClpP/crotonase-like domain;	79.51	2	7	14	19	35.0855	9.60319	5.05734	7.79539	12.4743	69.96	18.73	16.96	21.55	20.49	7	2	1	2	3	283	31.5312	8.26514
c104608_g1_i1:1:487:3:+	len=161	79.5	1	1	4	5			6.2817	6.30388	14.6801			18.63	27.33	60.87			1	1	2	161	18.4556	7.53271
c94090_g3_i1:1:587:2:+	len=195	79.49	1	24	33	40	97.5752	20.1688	22.0078	45.3368	79.2398	67.69	54.36	40	67.69	73.33	14	4	2	5	13	195	21.5318	10.272
c99769_g1_i3:1:707:3:+	len=235 acc=c99769_g1_i3:1:707:3:+ id=c99769_g1_i3:1:707:3:+ interpro_raw=IPR008914 interpro_family=IPR008914 def=IPR008914:Phosphatidylethanolamine-binding protein PEBP;	79.49	1	1	11	12	28.6118	29.9064	7.79158	4.5284		66.67	46.58	17.52	20.09		4	4	2	1		234	26.3874	8.5874
	>sp|CASK_BOVIN|	79.47	1	6	13	17	9.32712	16.5836		9.38664	25.9491	31.05	55.26	0	35.79	64.74	2	4		3	5	190	21.2559	6.771
c98146_g1_i1:1899:2660:3:+	len=254	79.45	1	1	24	24	45.5157	46.1981	3.09348	6.33595	36.6374	39.92	60.87	13.83	17	56.52	7	8	1	1	7	253	28.1153	7.32764
c99664_g1_i1:242:1558:2:+	len=439 acc=c99664_g1_i1:242:1558:2:+ interpro_family=IPR011701 go=GO:0016021,GO:0055085 interpro_raw=IPR011701,IPR020846 interpro_domain=IPR020846 id=c99664_g1_i1:242:1558:2:+ def=IPR011701:Major facilitator superfamily; IPR020846:Major facilitator superfamily domain;	79.45	2	1	25	37	7.54963	28.3939	11.8621	60.7026	74.463	37.21	33.79	14.61	66.67	61.19	3	4	3	10	8	438	48.4691	9.83252
c83068_g1_i3:148:468:1:+	len=107	79.44	1	7	14	30	6.68087	16.614	33.8784	24.6872	1.45646	34.58	64.49	79.44	74.77	14.95	1	5	6	7	2	107	12.0626	12.0151
c96709_g1_i3:136:765:1:+	len=210 acc=c96709_g1_i3:136:765:1:+ interpro_raw=IPR003388 interpro_family=IPR003388 id=c96709_g1_i3:136:765:1:+ def=IPR003388:Reticulon;	79.43	2	1	11	24	22.0083	34.4448	4.56625	7.78353	30.7927	36.84	33.49	19.62	25.84	72.73	3	4	1	2	4	209	24.4399	8.98291
c102965_g3_i2:342:549:2:-	len=69	79.41	1	1	2	2	6.32264		6.39742			60.29		63.24	0		1		1			68	7.20593	6.21436
c108424_g1_i1:1:207:2:+	len=68 acc=c108424_g1_i1:1:207:2:+ interpro_raw=IPR020683,IPR002110 go=GO:0005515 interpro_domain=IPR020683 id=c108424_g1_i1:1:207:2:+ def=IPR020683:Ankyrin repeat-containing domain;	79.41	1	1	4	4	6.04677			7.48621	6.69861	57.35			79.41	44.12	1			1	2	68	7.24602	9.24658
c93918_g1_i1:1:412:2:+	len=137 acc=c93918_g1_i1:1:412:2:+ go=GO:0016491,GO:0050661,GO:0055114,GO:0004616,GO:0006098 interpro_family=IPR012799 interpro_raw=IPR012284,IPR013328,IPR006114,IPR008927 pathways=KEGG:ec00480+1.1.1.44,UniPathway:UPA00115,KEGG:ec00030+1.1.1.44 ec=1.1.1.44 id=c93918_g1_i1:1:412:2:+ interpro_domain=IPR012284,IPR006114 def=IPR006114:6-phosphogluconate dehydrogenase, C-terminal; IPR012284:6-phosphog…	79.41	1	1	19	23	47.7122	38.5682	13.7293	11.555	14.8688	54.41	53.68	55.15	61.03	64.71	7	7	3	1	3	136	15.0397	8.00146
c95393_g1_i1:1:1025:3:+	len=341 acc=c95393_g1_i1:1:1025:3:+ interpro_raw=IPR000814,IPR015445,IPR012295 go=GO:0006352,GO:0003677 interpro_family=IPR000814 id=c95393_g1_i1:1:1025:3:+ def=IPR000814:TATA-box binding protein;	79.41	1	10	15	18	21.2047	14.5143	3.9135	20.083	9.39984	39.41	42.65	9.71	31.76	20.88	5	4	1	4	3	340	37.6292	8.80713
c103931_g2_i5:1:208:2:+	len=69 acc=c103931_g2_i5:1:208:2:+ id=c103931_g2_i5:1:208:2:+ ec=1.14.-.- interpro_raw=IPR001128 interpro_family=IPR001128 go=GO:0005506,GO:0020037,GO:0055114,GO:0016705 pathways= def=IPR001128:Cytochrome P450;	79.41	1	1	1	1		6.34082					79.41		0			1				68	8.03234	8.96826
c60553_g1_i1:1:310:2:+	len=103	79.41	1	1	2	2				8.79636	5.54825				69.61	65.69				1	1	102	11.6761	8.22119
c95026_g2_i1:1:863:3:+	len=287 acc=c95026_g2_i1:1:863:3:+ go=GO:0016021 interpro_raw=IPR006614,IPR006624 = interpro_domain=IPR006614 id=c95026_g2_i1:1:863:3:+ def=IPR006614:Peroxin/Ferlin domain;	79.37	1	12	30	37	42.8415	27.8547	30.1026	18.4829	34.6353	56.29	71.33	59.44	55.94	53.15	9	6	9	3	5	286	31.8931	9.1001
CL32Contig1:146:802:2:+	len=219 acc=CL32Contig1:146:802:2:+ interpro_domain=IPR016040 id=CL32Contig1:146:802:2:+ interpro_raw=IPR016040 def=IPR016040:NAD(P)-binding domain;	79.36	1	7	32	40	32.995	38.243	48.4533	29.9211	80.6007	45.87	69.27	77.06	73.85	47.71	5	7	9	6	7	218	24.0015	6.94678
c95205_g1_i2:208:675:1:+	len=156 acc=c95205_g1_i2:208:675:1:+ interpro_raw=IPR017340,IPR000690,IPR003604,IPR013085 interpro_family=IPR017340 go=GO:0005685,GO:0000398,GO:0000387,GO:0003676,GO:0008270,GO:0005634 interpro_domain=IPR003604 id=c95205_g1_i2:208:675:1:+ def=IPR003604:Zinc finger, U1-type; IPR017340:U1 small nuclear ribonucleoprotein C;	79.35	1	11	13	27	27.6991	20.7848	17.2028	6.10349	14.3639	37.42	55.48	70.97	27.74	67.1	4	4	3	2	5	155	16.8419	9.5542
c95795_g1_i5:64:996:1:+	len=311	79.35	1	7	37	46		56.3403	37.12	71.9388	26.8388	0	76.13	57.42	67.1	62.9		17	9	12	5	310	29.4203	9.5249
c36296_g1_i1:20:382:2:+	len=121 acc=c36296_g1_i1:20:382:2:+ interpro_domain=IPR012336 id=c36296_g1_i1:20:382:2:+ interpro_family=IPR004480 go=GO:0009055,GO:0045454,GO:0015035 interpro_raw=IPR014434,IPR004480,IPR012336,IPR002109 def=IPR004480:Monothiol glutaredoxin-related; IPR012336:Thioredoxin-like fold;	79.34	1	1	3	5	8.0786		12.0421		13.1879	32.23		64.46		61.16	1		2		1	121	13.9882	8.41162
c97136_g1_i1:130:1221:1:+	len=364 acc=c97136_g1_i1:130:1221:1:+ id=c97136_g1_i1:130:1221:1:+ interpro_raw=IPR013861 interpro_family=IPR013861 def=IPR013861:Protein of unknown function DUF1751, integral membrane, eukaryotic;	79.34	1	1	12	12	6.23683	29.1943	10.3765	10.1675	3.20812	16.25	61.98	34.44	37.47	7.44	1	6	2	2	1	363	40.369	9.1001
CL1288Contig1:1:1354:2:+	len=451 acc=CL1288Contig1:1:1354:2:+ interpro_domain=IPR013088 id=CL1288Contig1:1:1354:2:+ interpro_raw=IPR013088,IPR008946,IPR001723,IPR001628,IPR000536 interpro_family=IPR001723 go=GO:0006355,GO:0003707,GO:0005634,GO:0008270,GO:0003677,GO:0043565,GO:0043401,GO:0003700 pathways= def=IPR001723:Steroid hormone receptor; IPR013088:Zinc finger, NHR/GATA-type;	79.33	1	4	24	28	60.5362	18.9898		28.8201	35.1195	45.56	36.89	0	24.67	66.44	8	5		4	8	450	50.4405	8.33838
c95553_g1_i1:92:718:2:+	len=209 acc=c95553_g1_i1:92:718:2:+ id=c95553_g1_i1:92:718:2:+ interpro_family=IPR003083 go=GO:0005515 interpro_raw=IPR012336,IPR004045,IPR010987 def=IPR003083:S-crystallin;	79.33	1	1	8	8	6.93544	6.76202	5.06929		8.05529	23.08	25.96	53.85		40.38	2	2	2		2	208	23.2426	5.47803
c100376_g3_i1:1:264:3:+	len=87 acc=c100376_g3_i1:1:264:3:+ interpro_domain=IPR020683 id=c100376_g3_i1:1:264:3:+ go=GO:0005515 interpro_raw=IPR020683,IPR002110 def=IPR020683:Ankyrin repeat-containing domain;	79.31	1	4	12	13	19.866	5.35955	7.28257	11.072	14.5273	79.31	45.98	28.74	47.13	54.02	3	1	3	3	3	87	9.33893	5.08447
c76658_g1_i1:77:337:2:+	len=87 acc=c76658_g1_i1:77:337:2:+ interpro_domain=IPR003807 id=c76658_g1_i1:77:337:2:+ interpro_raw=IPR003807 def=IPR003807:Domain of unknown function DUF202;	79.31	1	1	4	8	33.5548	5.84944			15.6054	78.16	56.32			67.82	3	1			1	87	9.72021	10.3599
c96036_g1_i2:201:811:3:+	len=203	79.31	1	4	9	10	15.9205	3.91039		9.89898	5.64653	45.32	54.19	0	37.93	23.65	3	2		3	1	203	22.578	9.15869
CL3917Contig1:264:788:3:+	len=175 acc=CL3917Contig1:264:788:3:+ interpro_raw=IPR003114 id=CL3917Contig1:264:788:3:+ interpro_domain=IPR003114 def=IPR003114:Phox-associated domain;	79.31	1	1	6	6		7.62153	3.17628	4.35715	23.2881		59.77	19.54	27.01	45.4		2	1	1	2	174	20.4419	9.36377
CL3526Contig1:546:722:3:+	len=59	79.31	1	1	1	1					3.98801				0	79.31					1	58	6.54837	11.8394
c100841_g1_i4:360:1100:3:+	len=247 acc=c100841_g1_i4:360:1100:3:+ id=c100841_g1_i4:360:1100:3:+ interpro_domain=IPR024518 = interpro_raw=IPR006616,IPR024518 def=IPR024518:Domain of unknown function DUF3421;	79.27	1	3	23	31	54.7221	38.1432	32.4199	35.5626	12.2463	53.66	52.03	51.22	60.57	19.92	8	6	5	5	2	246	26.792	5.31299
CL9115Contig1:1:406:2:+	len=135	79.26	1	5	7	7	12.5336	6.3577		17.3807	6.97367	54.81	72.59		71.11	52.59	2	2		2	1	135	15.4983	9.05615
c102432_g2_i2:179:1975:2:+	len=599 acc=c102432_g2_i2:179:1975:2:+ ec=3.2.1.52 interpro_domain=IPR017853,IPR029018,IPR015883 id=c102432_g2_i2:179:1975:2:+ pathways=KEGG:ec00603+3.2.1.52,KEGG:ec00604+3.2.1.52,KEGG:ec00513+3.2.1.52,KEGG:ec00520+3.2.1.52,KEGG:ec00511+3.2.1.52,KEGG:ec00531+3.2.1.52,MetaCyc:PWY-6902 interpro_family=IPR025705 go=GO:0004553,GO:0005975,GO:0004563 interpro_raw=IPR029018,IPR013781,IPR015883,IPR017853…	79.26	1	1	25	32	60.6694	17.873	16.2035	11.8075	16.06	32.27	32.44	31.1	29.43	32.44	7	5	4	5	5	598	67.5604	4.90674
c104288_g1_i1:186:506:3:+	len=107 acc=c104288_g1_i1:186:506:3:+ id=c104288_g1_i1:186:506:3:+ interpro_domain=IPR012677 go=GO:0000166,GO:0003676 interpro_raw=IPR000504,IPR012677 def=IPR012677:Nucleotide-binding alpha-beta plait domain;	79.25	1	1	5	5	19.2345		4.86382			51.89		42.45			4		1			106	12.2743	9.30518
CL843Contig2:157:1503:1:+	len=449 acc=CL843Contig2:157:1503:1:+ interpro_domain=IPR001662 id=CL843Contig2:157:1503:1:+ interpro_raw=IPR001662,IPR004046,IPR010987,IPR012336,IPR004045 interpro_family=IPR003083 go=GO:0005515,GO:0003746,GO:0006414 def=IPR001662:Translation elongation factor EF1B, gamma chain, conserved; IPR003083:S-crystallin;	79.24	2	14	21	46	25.6937	22.5118	32.8351	21.1899	52.8165	16.29	59.82	33.26	26.79	25.45	3	7	8	5	5	448	51.299	8.67529
c93807_g1_i1:223:846:1:+	len=208 acc=c93807_g1_i1:223:846:1:+ id=c93807_g1_i1:223:846:1:+ go=GO:0007034 interpro_family=IPR005024 interpro_raw=IPR005024 def=IPR005024:Snf7 family;	79.23	1	1	25	33	23.3	27.3618	20.432	13.5523	77.184	40.58	79.23	36.71	47.34	56.04	5	7	1	3	10	207	23.0576	5.71924
c24667_g1_i1:1:234:2:+	len=77 acc=c24667_g1_i1:1:234:2:+ interpro_raw=IPR027417 interpro_domain=IPR027417 id=c24667_g1_i1:1:234:2:+ def=IPR027417:P-loop containing nucleoside triphosphate hydrolase;	79.22	1	1	3	5	6.69674	2.99527			7.94184	79.22	64.94			33.77	2	1			1	77	8.37642	8.41162
c93379_g2_i1:35:268:2:+	len=78 acc=c93379_g2_i1:35:268:2:+ interpro_domain=IPR029058 id=c93379_g2_i1:35:268:2:+ interpro_raw=IPR002018,IPR029058 def=IPR029058:Alpha/Beta hydrolase fold;	79.22	1	2	2	2	2.17403		4.85921			27.27	0	51.95		0	1		1			77	8.57237	8.22119
c87877_g1_i1:96:400:3:+	len=101 acc=c87877_g1_i1:96:400:3:+ id=c87877_g1_i1:96:400:3:+ interpro_domain=IPR029062 interpro_raw=IPR029062,IPR002818 def=IPR029062:Class I glutamine amidotransferase-like;	79.21	1	3	11	12	21.1508	8.29616	6.75497	3.97657	24.0517	66.34	66.34	50.5	22.77	79.21	3	1	2	2	4	101	10.7546	5.89697
CL1194Contig1:72:1112:3:-	len=347 acc=CL1194Contig1:72:1112:3:- id=CL1194Contig1:72:1112:3:- interpro_domain=IPR000905 interpro_family=IPR017861 interpro_raw=IPR017861,IPR000905,IPR017860 def=IPR000905:Gcp-like domain; IPR017861:Kae1/TsaD family;	79.19	1	3	19	27	48.3354	35.6127		33.3625	41.1173	32.37	38.15	0	33.53	59.83	5	4		6	6	346	38.4924	6.41748
c96892_g1_i1:199:719:1:+	len=173	79.19	1	1	15	15	25.231	17.5562	7.33885	11.5558	26.5042	68.21	29.48	21.39	48.55	33.53	4	3	2	3	3	173	19.7972	9.59814
c103558_g1_i7:121:411:1:+	len=97	79.17	1	1	11	12	6.70285	17.9055	17.6322	13.0106	9.77783	40.63	58.33	79.17	56.25	63.54	1	3	4	2	2	96	10.6565	10.5796
c109079_g1_i1:1:218:3:+	len=72 acc=c109079_g1_i1:1:218:3:+ id=c109079_g1_i1:1:218:3:+ go=GO:0055085,GO:0005215,GO:0006810,GO:0016020 interpro_family=IPR001734 interpro_raw=IPR001734 def=IPR001734:Sodium/solute symporter;	79.17	1	1	2	3	13.2909	6.25938				79.17	79.17				2	1				72	7.81016	9.24658
c92281_g1_i1:16:162:1:+	len=49	79.17	1	2	2	2	3.31001					79.17					2					48	5.54295	10.3745
c62180_g1_i1:1:493:2:+	len=164	79.14	1	1	4	4	6.03118	9.17019			14.7072	24.54	28.83	0	0	74.23	1	1			2	163	18.2458	7.06396
c102669_g1_i1:1:1511:1:+	len=503 acc=c102669_g1_i1:1:1511:1:+ interpro_domain=IPR020846 id=c102669_g1_i1:1:1511:1:+ interpro_raw=IPR020846,IPR011701 interpro_family=IPR011701 go=GO:0055085,GO:0016021 def=IPR011701:Major facilitator superfamily; IPR020846:Major facilitator superfamily domain;	79.13	1	1	24	30	69.3346	7.59696	14.5638	9.16769	78.8667	56.06	28.23	35.98	15.71	39.56	9	3	5	1	6	503	55.165	8.35303
c67480_g1_i1:1:277:3:+	len=91	79.12	1	1	3	4	2.79572	9.94166				59.34	53.85		0		1	2				91	9.92594	7.28369
c95680_g1_i1:220:897:1:+	len=226 acc=c95680_g1_i1:220:897:1:+ interpro_raw=IPR003140,IPR029058 go=GO:0016787 id=c95680_g1_i1:220:897:1:+ interpro_domain=IPR029058 ec=3.-.-.- def=IPR029058:Alpha/Beta hydrolase fold;	79.11	1	5	14	17	24.8269	21.3893	10.4369	12.847	22.7324	71.11	55.56	20.44	21.78	28	5	4	1	1	4	225	24.9781	6.44287
c104425_g1_i1:167:901:2:+	len=245 acc=c104425_g1_i1:167:901:2:+ interpro_raw=IPR026610,IPR029063 go=GO:0008171,GO:0001510,GO:0008173 interpro_family=IPR026610 id=c104425_g1_i1:167:901:2:+ interpro_domain=IPR029063 ec=2.1.1.- def=IPR026610:3'-RNA ribose 2'-O-methyltransferase, Hen1; IPR029063:S-adenosyl-L-methionine-dependent methyltransferase;	79.1	3	1	7	10		34.3791	15.6416	3.50372	15.9465		55.74	31.56	9.43	34.02		3	2	1	2	244	28.2373	6.07471
CL749Contig2:128:646:2:+	len=173 acc=CL749Contig2:128:646:2:+ pathways= go=GO:0016020,GO:0015031,GO:0007264,GO:0005525,GO:0007165,GO:0005622 interpro_family=IPR001806 interpro_raw=IPR003578,IPR001806,IPR003579,IPR020849,IPR027417 id=CL749Contig2:128:646:2:+ interpro_domain=IPR027417 def=IPR001806:Small GTPase superfamily; IPR027417:P-loop containing nucleoside triphosphate hydrolase;	79.07	3	1	11	17	27.4967	14.7462	6.99623	2.77334	6.09405	73.84	35.47	31.98	11.05	45.93	5	3	2	1	1	172	19.5698	7.78174
CL2179Contig1:99:1189:3:+	len=363 acc=CL2179Contig1:99:1189:3:+ id=CL2179Contig1:99:1189:3:+ ec=1.14.-.- interpro_raw=IPR002401,IPR001128 interpro_family=IPR001128 go=GO:0020037,GO:0016705,GO:0005506,GO:0055114 pathways= def=IPR001128:Cytochrome P450;	79.06	1	7	16	17		28.326	45.5073	2.60992		0	34.99	64.74	34.16	0		5	8	3		363	41.5132	7.26904
c99048_g1_i1:243:1448:3:+	len=402 acc=c99048_g1_i1:243:1448:3:+ id=c99048_g1_i1:243:1448:3:+ interpro_domain=IPR015943 interpro_raw=IPR015943,IPR017986,IPR001680,IPR019775 go=GO:0005515 def=IPR015943:WD40/YVTN repeat-like-containing domain;	79.05	2	2	20	25	20.67	23.7459	23.0548	15.6355	13.1393	27.18	47.88	46.38	29.43	35.66	5	6	3	4	5	401	44.1422	6.354
c93753_g1_i1:1:504:2:+	len=167 acc=c93753_g1_i1:1:504:2:+ interpro_raw=IPR002198,IPR016040,IPR002347 go=GO:0016491,GO:0008152 interpro_family=IPR002347 id=c93753_g1_i1:1:504:2:+ ec=1.-.-.- def=IPR002347:Glucose/ribitol dehydrogenase;	79.04	1	2	25	28	66.6734	20.6354	23.1691		47.0334	40.72	63.47	35.33	0	79.04	10	5	3		8	167	17.7244	5.64307
c99261_g1_i1:460:1521:1:+	len=354 acc=c99261_g1_i1:460:1521:1:+ interpro_domain=IPR007223,IPR001452 id=c99261_g1_i1:460:1521:1:+ go=GO:0005777,GO:0016560,GO:0016021,GO:0005515 interpro_raw=IPR007223,IPR011511,IPR001452 def=IPR001452:SH3 domain; IPR007223:Peroxin 13, N-terminal;	79.04	1	11	28	35	32.9985	57.374	68.8185	10.5029	60.8491	57.79	65.44	40.51	13.88	64.59	5	10	4	4	7	353	38.8393	7.47412
c102220_g1_i4:254:1243:2:+	len=330 acc=c102220_g1_i4:254:1243:2:+ id=c102220_g1_i4:254:1243:2:+ ec=1.5.1.5 pathways=MetaCyc:PWY-1722,KEGG:ec00720+1.5.1.5,UniPathway:UPA00193,MetaCyc:PWY-5497,MetaCyc:PWY-6613,MetaCyc:PWY-3841,KEGG:ec00670+1.5.1.5,MetaCyc:PWY-5030,MetaCyc:PWY-2201 interpro_raw=IPR020630,IPR020867,IPR016040,IPR000672,IPR020631 go=GO:0055114,GO:0009396,GO:0004488,GO:0003824 interpro_family=IPR000672 def=IPR000…	79.03	5	1	15	17	24.2575	32.4627	33.0381	11.5009	2.91642	31.91	37.08	34.35	24.01	48.02	4	5	3	1	3	329	35.9861	9.24658
c97325_g4_i7:382:1313:1:+	len=310	79.03	3	1	27	31	10.6759	40.6511	54.0663	6.73524	51.5448	24.84	66.13	52.26	15.16	45.48	2	8	11	1	8	310	33.2271	4.38623
c102912_g2_i2:1:1160:1:+	len=386 acc=c102912_g2_i2:1:1160:1:+ interpro_domain=IPR020683 id=c102912_g2_i2:1:1160:1:+ go=GO:0005515 interpro_raw=IPR002110,IPR020683 def=IPR020683:Ankyrin repeat-containing domain;	79.02	1	6	12	15	2.43969	35.6297	5.60628	10.7274	3.6756	4.15	76.68	17.1	13.73	6.48	1	7	1	2	1	386	41.9112	5.99854
c86725_g1_i1:138:569:3:+	len=144 acc=c86725_g1_i1:138:569:3:+ id=c86725_g1_i1:138:569:3:+ interpro_raw=IPR004127,IPR009053,IPR011599 interpro_family=IPR011599,IPR009053 go=GO:0051082,GO:0016272,GO:0006457 def=IPR009053:Prefoldin; IPR011599:Prefoldin alpha subunit, archaea-type;	79.02	1	1	6	8	46.603			5.07951	3.43379	79.02		0	43.36	19.58	4			1	1	143	16.3616	5.65576
CL8895Contig1:105:593:3:+	len=163 acc=CL8895Contig1:105:593:3:+ id=CL8895Contig1:105:593:3:+ interpro_family=IPR001232 go=GO:0006511 interpro_raw=IPR001232,IPR011333,IPR016897,IPR016073,IPR016072 pathways=UniPathway:UPA00143 def=IPR001232:S-phase kinase-associated protein 1-like;	79.01	1	1	3	5	8.10548	10.2623				12.96	79.01	0			1	2				162	18.5412	4.53857
c101104_g1_i1:73:804:1:+	len=244 acc=c101104_g1_i1:73:804:1:+ id=c101104_g1_i1:73:804:1:+ interpro_raw=IPR010562 interpro_family=IPR010562 def=IPR010562:Haemolymph juvenile hormone binding;	79.01	1	1	18	21	54.2619	29.5292	19.1817	17.1822	23.9696	62.96	32.1	39.92	50.21	52.26	7	3	3	3	4	243	27.1962	7.73779
CL2821Contig1:1:417:1:+	len=139 acc=CL2821Contig1:1:417:1:+ pathways=MetaCyc:PWY-1042,KEGG:ec00051+2.7.1.11,UniPathway:UPA00109,MetaCyc:PWY-1861,KEGG:ec00030+2.7.1.11,KEGG:ec00010+2.7.1.11,KEGG:ec00052+2.7.1.11,MetaCyc:PWY-7385,MetaCyc:PWY-5484,KEGG:ec00680+2.7.1.11 go=GO:0006002,GO:0003872,GO:0006096 interpro_family=IPR022953 interpro_raw=IPR022953,IPR000023,IPR015912 ec=2.7.1.11 id=CL2821Contig1:1:417:1:+ interpro_dom…	78.99	1	2	11	11	8.03462	7.15888	12.1131	12.4438	30.5544	51.45	44.2	55.07	63.77	78.26	1	2	2	1	5	138	14.6927	8.11865
[truncated: 11,041 more rows]
